# Supplementary material for: Mammary-specific expression of Trim24 establishes a mouse model of human metaplastic breast cancer
Source: PubMed Central journal article supplement (PMC8433435; doi:10.1038/s41467-021-25650-z), 2021-09-10
Supplement: 41467_2021_25650_MOESM1_ESM.pdf [file 41467_2021_25650_MOESM1_ESM.pdf]

## **Supplementary Information**

**Mammary-specific expression of *Trim24* establishes a mouse model of human metaplastic breast cancer**

**Shah *et al.***

**Supplementary Figures 1-5**

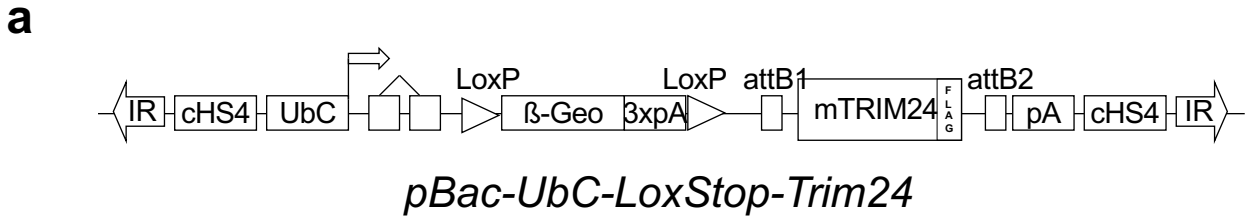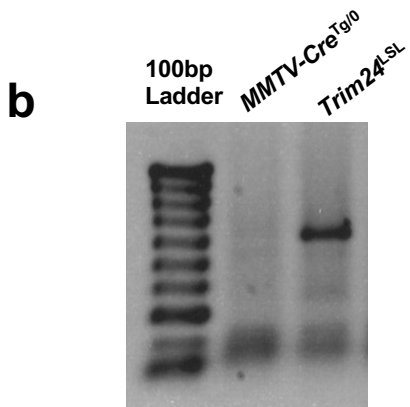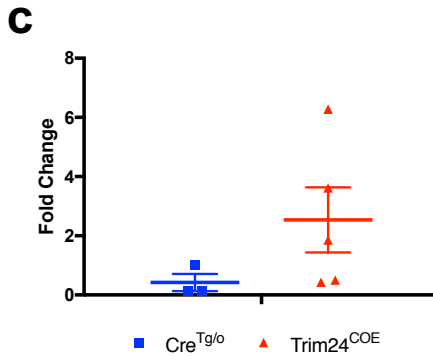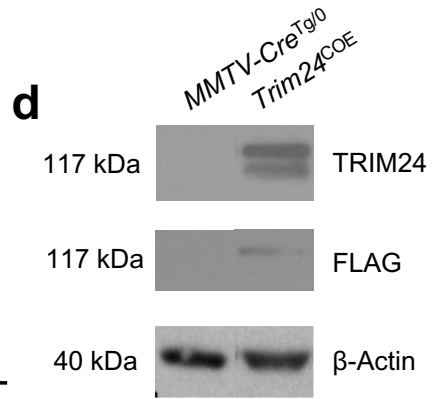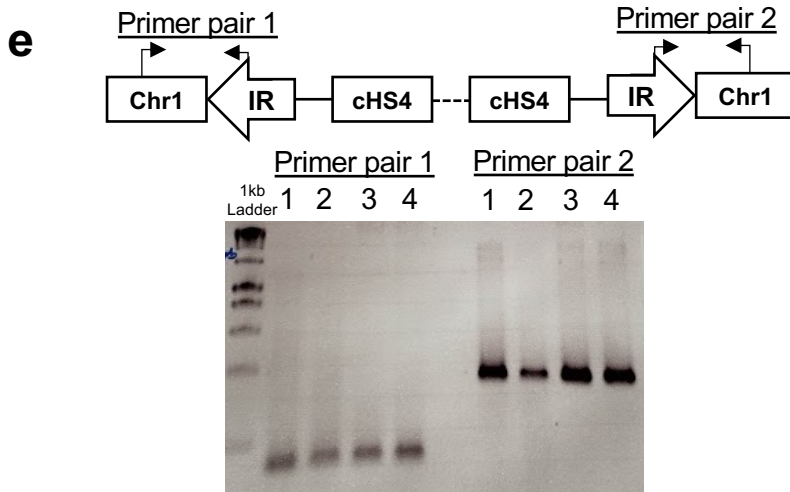

1 **SUPPLEMENTARY FIGURE LEGENDS**

2 **Supplementary Figure 1 (Related to Figure 1):** Generation of piggyBac-Ubc-TRIM24  
3 conditional over expression mouse model. **a** Schematic representation of UBC- $\beta$ -Geo-TRIM24-  
4 FLAG piggyBac construct. IR: Inverted Repeats, cHS4: beta-globin, UbC: human UbC promoter,  
5  $\beta$ -Geo: Beta-galactosidase, 3XpA: polyadenylation sequence. **b** Genotyping analysis (PCR) of  
6 *MMTV-Cre<sup>Tg/0</sup>* and *Trim24<sup>LSL</sup>* mice, showing positive band at 650 base pairs. This image is  
7 representative of >50 experiments. **c** qRT-PCR showing fold change of *Trim24* RNA expression  
8 in *Trim24<sup>CO</sup>* mouse mammary glands compared to *MMTV-Cre<sup>Tg/0</sup>* (n= 5 biological replicates). Data  
9 represented in this graph as mean  $\pm$  SEM. **d** Western blot analysis with TRIM24, Flag and  $\beta$ -  
10 Actin antibodies of *MMTV-Cre<sup>Tg/0</sup>* and *Trim24<sup>COE</sup>* mouse mammary gland protein lysates. This  
11 image is representative of >10 experiments. **e** Schematic representation of primers used to  
12 validate the position of UBC- $\beta$ -Geo-TRIM24-FLAG piggyBac transgene within chromosome 1q.  
13 Gel electrophoresis of PCR amplification of genomic DNA from 4 individual mice in a cohort shows  
14 derivation from a single founder. This image is representative of 3 experiments.

*Trim24*<sup>COE</sup>  
Carcinosarcomas

Positive  
Control

ER

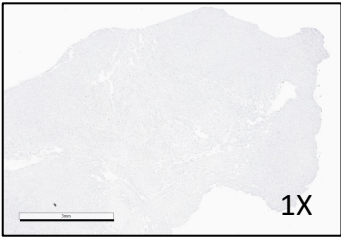

1X

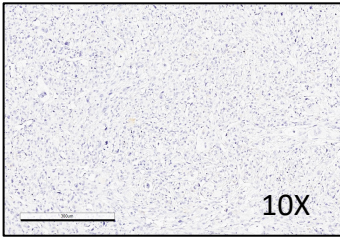

10X

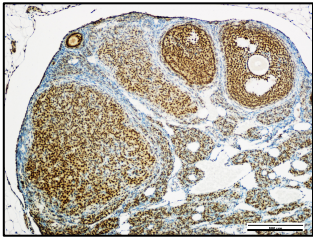

PR

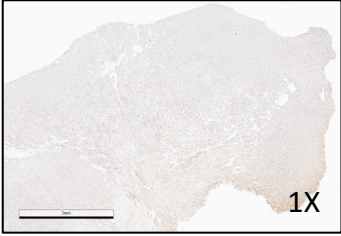

1X

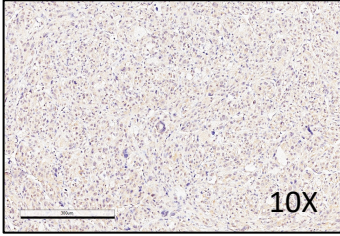

10X

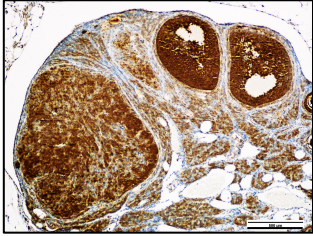

ERRB2

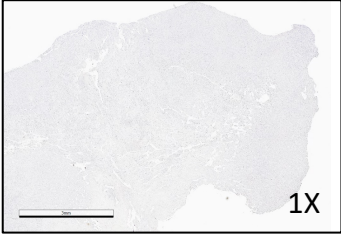

1X

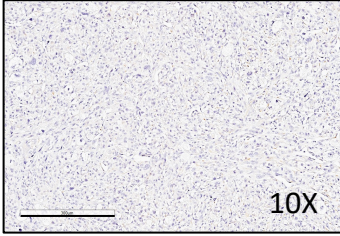

10X

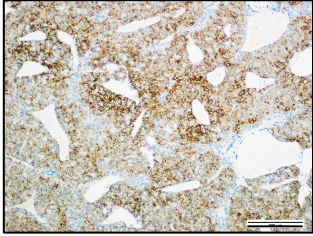

15 **Supplementary Figure 2 (Related to Figure 2):** IHC staining of *Trim24*<sup>COE</sup> metaplastic  
16 carcinosarcomas for ER, PR and ERRB2 (HER2) at 1X and 10X magnifications (first two  
17 columns). The third column shows positive control IHC for each antibody: ER and PR IHC of a  
18 mouse uterus; ERRB2 IHC of a HER2-positive mouse mammary tumor (Scale bar= 500μM).  
19 Images are representative of 10 experiments. Scale bar = 3mM (1X) and 300μM (10X).

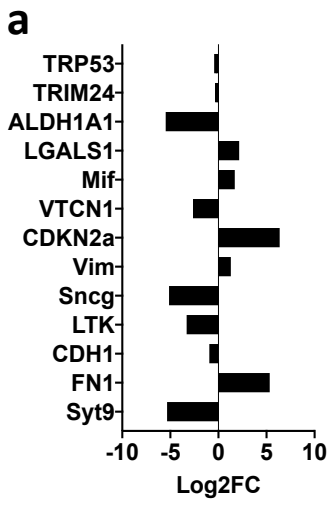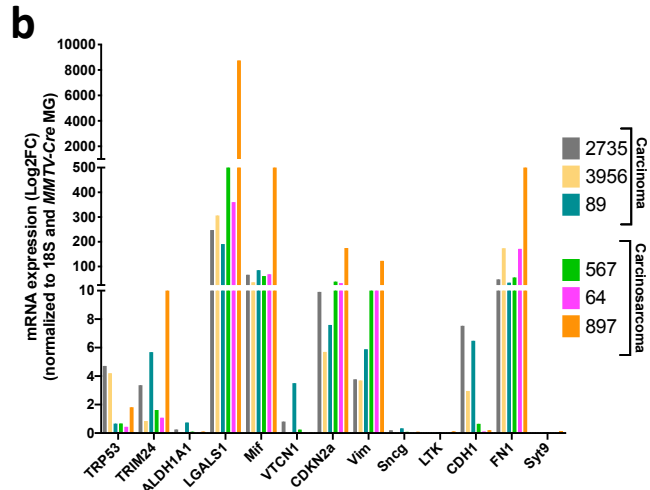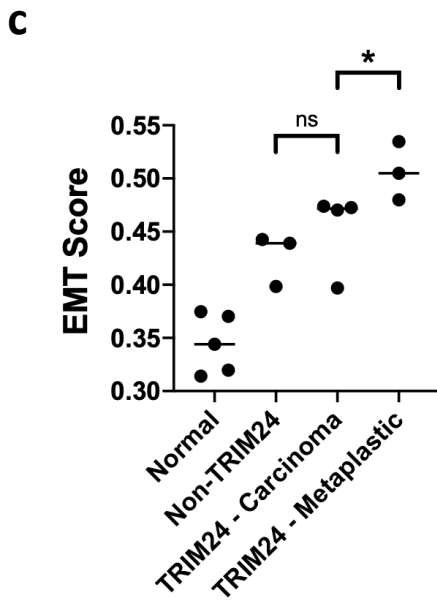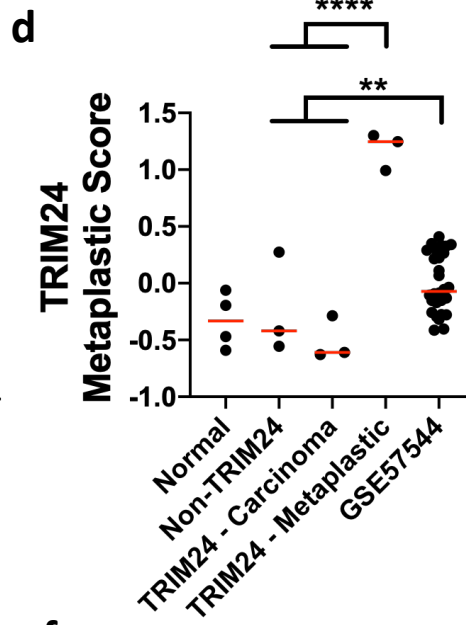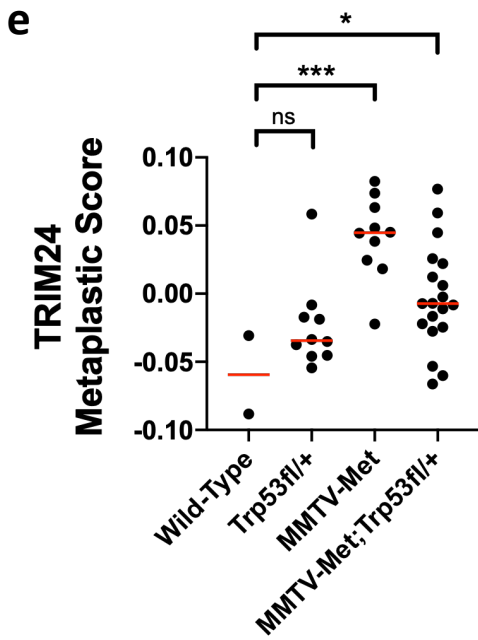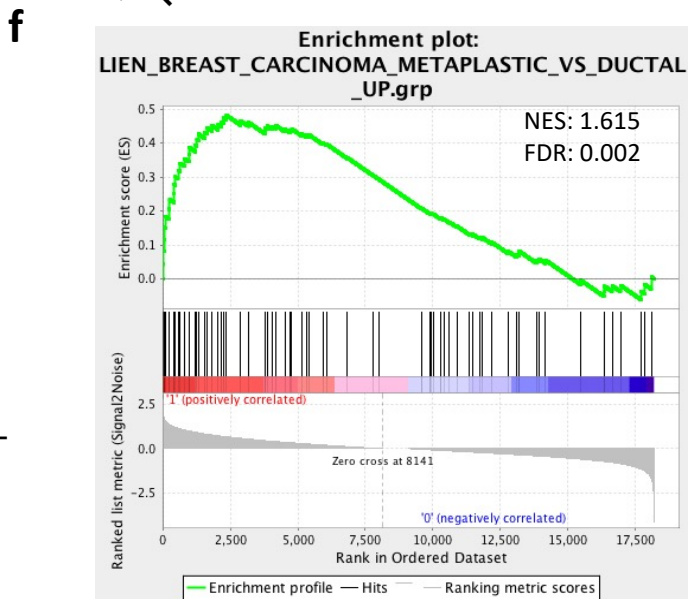

20 **Supplementary Figure 3 (Related to Figure 4):** Assessment of genes differentially expressed  
21 in *Trim24*<sup>COE</sup> tumors. **a** Log<sub>2</sub> fold change of expression of selected genes from RNA-Seq analysis  
22 of *Trim24*<sup>COE</sup> metaplastic carcinosarcoma tumors. **b** qRT-PCR validation of individual tumor  
23 samples matched to selected genes from A. These values are normalized to 18S and delta-C<sub>t</sub>  
24 values are normalized to *MMTV-Cre*<sup>Tg/0</sup> mammary gland analyses to calculate fold change. **c**  
25 Representative graph shows EMT pathway scores of Normal *MMTV-Cre*<sup>Tg/0</sup> mammary glands  
26 (n=5 independent samples), Non-TRIM24 driven mammary carcinomas (n= 3 independent  
27 tumors) , TRIM24-driven carcinomas (n= 4 independent tumors), and *Trim24*<sup>COE</sup> metaplastic  
28 carcinosarcomas (n= 3 independent tumors). **d** Microarray expression of human breast  
29 metaplastic carcinoma (GSE57544) is compared to various genotypes of our cohort using  
30 TRIM24 metaplastic score. All samples are biologically independent replicates (normal: n= 4,  
31 Non-TRIM24, TRIM24-Carcinosarcoma and TRIM24- Metaplastic: n= 3 per group, and  
32 GSE57544: n=28). **e** The TRIM24 signature scores (Y-axis) are shown for biologically  
33 independent samples of wild type (WT) (n=2), Trp53<sup>fl/+</sup>(n=10), MMTV-Met (n=10), and MMTV-  
34 Met;Trp53<sup>fl/+</sup> mammary cells (n=19). **f** GSEA enrichment plot of metaplastic breast cancer gene  
35 set aligned to RNA-Seq data of *Trim24*<sup>COE</sup> tumors (1) compared to *MMTV-Cre*<sup>Tg/0</sup> mammary  
36 glands (0). Data represented in graph **c-e** as median values and p-values are calculated using  
37 one-way ANOVA for multiple comparison using Fisher's test. (ns- non-significant, \* p<0.05, \*\*  
38 p<0.01, \*\*\* p<0.001, \*\*\*\* p<0.0001)

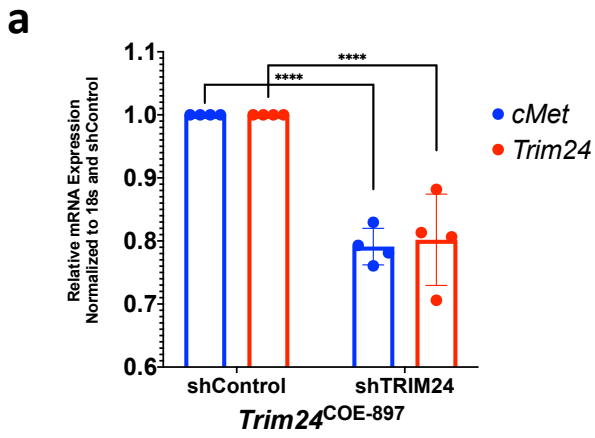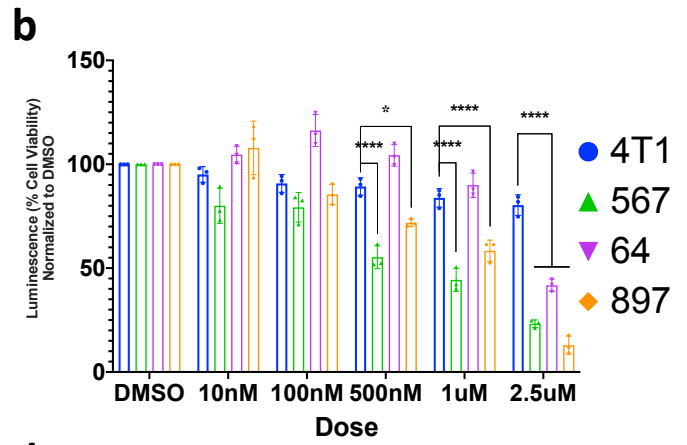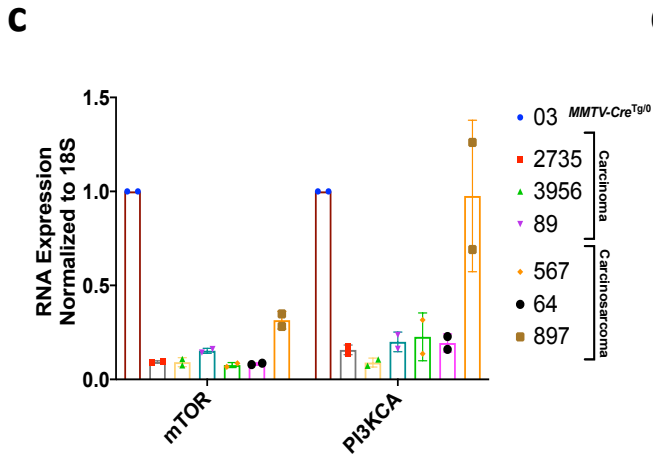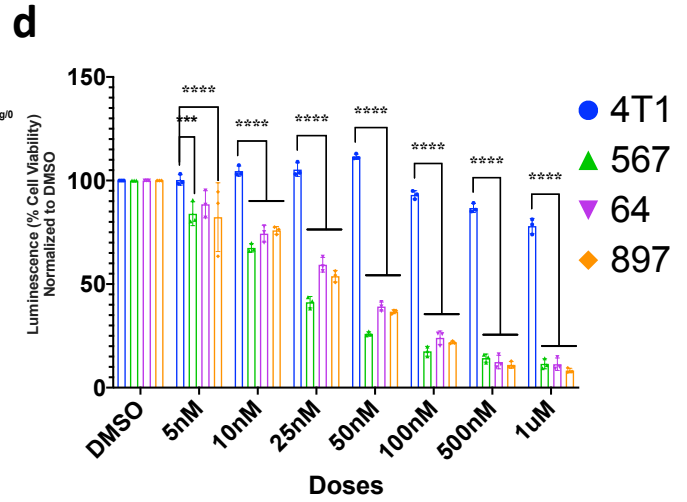



39 **Supplementary Figure 4 (Related to Figure 5):** TRIM24 activates c-MET and its downstream  
40 targets PI3K-mTOR to support metaplastic carcinosarcoma cell viability. **a** qRT-PCR analysis  
41 shows significant reduction of both *Trim24* and *cMet* at mRNA level in *Trim24* knockdown  
42 (shTRIM24) compared to control cell line (shControl) using *Trim24*<sup>COE</sup> primary cell line 897 (n= 4  
43 biological replicates). **b** Cell viability assay of 4T1 (mouse TNBC cell line, non-metaplastic) and  
44 *Trim24*<sup>COE</sup> primary cell lines (567, 64 and 897) after treatment with PHA-665752, a selective small  
45 molecule inhibitor of c-Met. Percent cell viability is measured using a luminescence reader and  
46 values are normalized to DMSO, a vehicle control (n= 3 biological replicates). **c** qRT-PCR  
47 validation of mTOR and PI3KCA RNA expression in *Trim24*<sup>COE</sup> tumors compared to *MMTV-Cre*<sup>Tg/0</sup>  
48 mammary gland (03) (n= 2 technical replicates). **d** Cell viability assay of 4T1 (mouse TNBC cell  
49 line, non-metaplastic) and *Trim24*<sup>COE</sup> primary cell lines (567, 64 and 897) treated with Dactolisib,  
50 a dual ATP-competitive PI3K and mTOR inhibitor. Percent cell viability is measured using a  
51 luminescence reader and values are normalized to DMSO, a vehicle control (n= 3 biological  
52 replicates). Data represented as mean  $\pm$  SEM in **a**, **c**, **d** and as median in **b**. p-values are  
53 calculated by two-way ANOVA for multiple comparison using Holm-Sidak method in **a**, **c**, **d**. (\*  
54 p<0.05, \*\* p<0.01, \*\*\* p<0.001, \*\*\*\* p<0.0001)

**a**

| PDX Model | BC Type | VB Subtype |
|-----------|---------|------------|
| PIM056    | MpBC    | BL2        |
| PIM010    | MpBC    | M*         |
| PIM077    | MpBC    | BL2        |
| PIM228    | MpBC    | MSL        |
| PIM091    | TNBCC   | LAR        |
| PIM172    | TNBCC   | UNS        |
| PIM262    | TNBCC   | LAR        |
| PIM190    | TNBCC   | BL1        |

**b**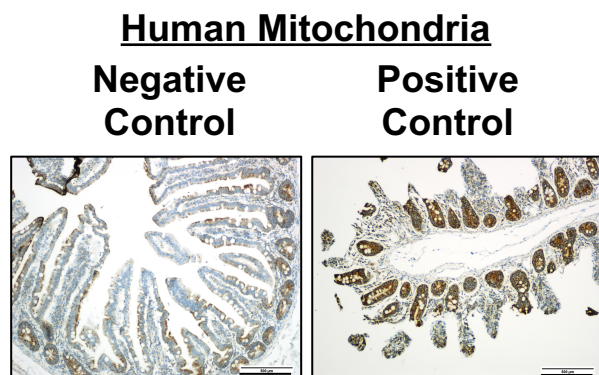**c**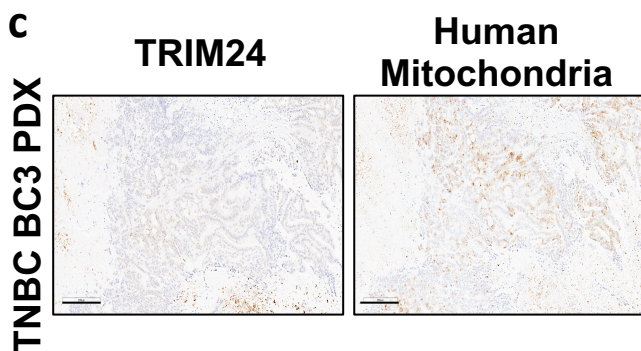**d**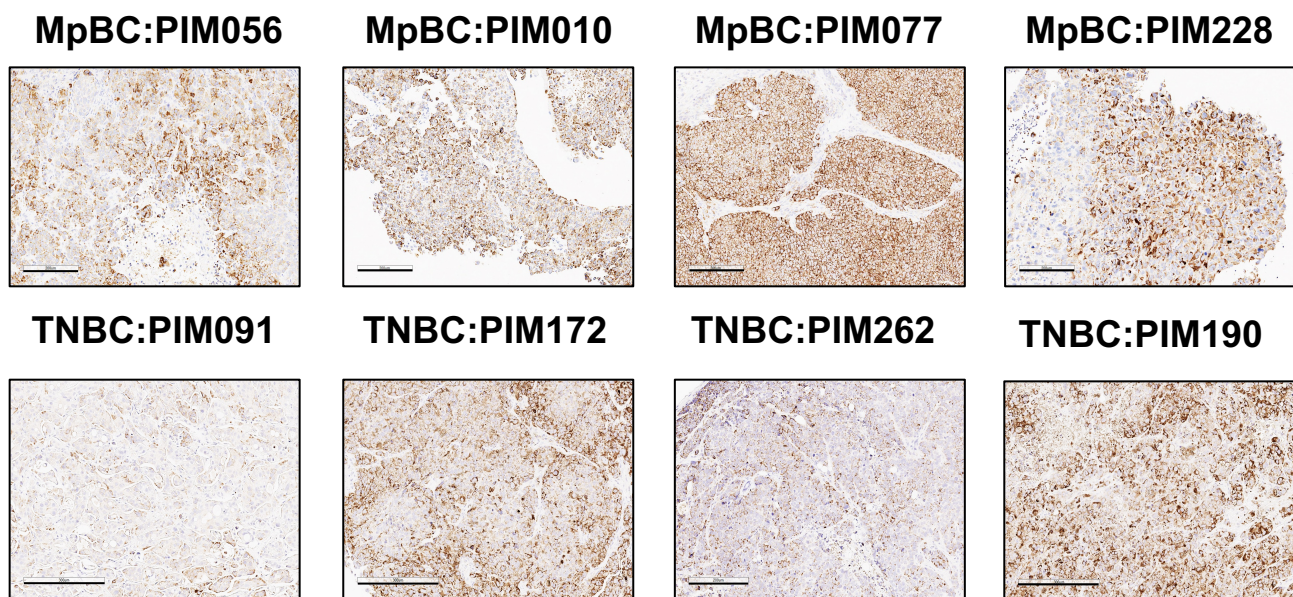**e**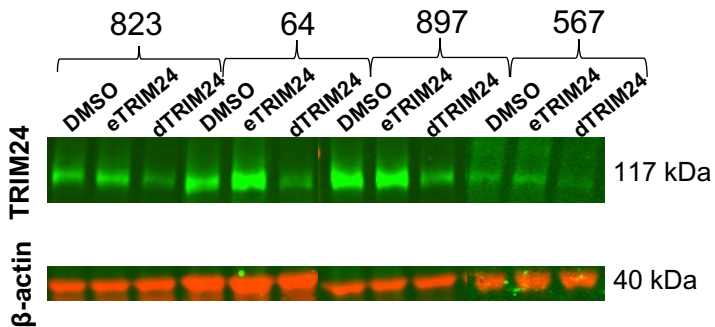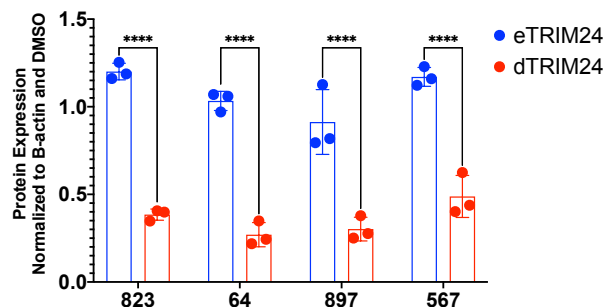

55 **Supplementary Figure 5 (Related to Figure 7):** Human mitochondria stain confirms expression  
56 of TRIM24 in MpBC and TNBC PDXs and degradation of TRIM24 via PROTAC reduces TRIM24  
57 protein expressions in primary cell lines. **a** TNBC patient tumor samples were used to generate  
58 PDX mouse models. Breast cancer diagnosis (BC): MpBC and (non-MpBC) TNBC. Vanderbilt  
59 (VB) subtyping: BL- basal like, IM- immunomodulatory, LAR- luminal androgen receptor, M\*-  
60 mesenchymal, MSL- mesenchymal stem-like and UNS- unstable tumor type **b** Representative  
61 images of positive and negative controls of human mitochondria stain using human intestine  
62 tissue. The image shown is representative of 3 experiments. Scale bar = 500 $\mu$ M. **c** Representative  
63 images of TNBC BC3 PDX for TRIM24 and human mitochondria stain at 10X magnification shows  
64 minimum expression of TRIM24. The image is representative of 3 experiments. Scale bar= 200 $\mu$ M  
65 **d** Representative images of human mitochondrial IHC staining of human MpBC PDXs compared  
66 to nonMpBC-TNBC PDXs. The image is representative of >5 experiments. Scale bars = 200 $\mu$ M  
67 for all MpBC set and PIM262, 300 $\mu$ M for PIM091, PIM172 and PIM190. **e** The PROTAC dTRIM24  
68 reduced TRIM24 protein levels, as compared to eTRIM24 and DMSO treatments. A  
69 representative western blot analysis of control cell line, 823, and metaplastic carcinosarcoma  
70 derived cell lines, 64, 897 and 567, shows reduction of TRIM24 protein in dTRIM24 treatment  
71 compared to DMSO and eTRIM24 treatments. Green- TRIM24, Red- beta-actin (used as an  
72 endogenous control) (n= 3 biological replicates). The graph below shows Image J-analyzed/semi-  
73 quantification of three biological replicates of drug treatments. Data represented as mean  $\pm$  SEM  
74 and p-values are calculated based on two-way ANOVA for multiple comparison using Holm-Sidak  
75 method (\*\*\*\*  $p < 0.0001$ ).

76 **SUPPLEMENTARY DATA**

77 **Supplementary Data 1:** List of antibodies used for western-blot analysis, immunohistochemistry  
78 and CyTOF.

79 **Supplementary Data 2:** List of primers used for Piggybac cloning, qRT-PCR and genotyping.

80 **Supplementary Data 3:** Table of discordant reads to identify Trim24-Flag insertion in mouse  
81 genome using 2 biological replicates.

82 **Supplementary Data 4:** List of TRIM24-driven mouse tumors and their pathological classification,  
83 necropsy details and samples selected for RNA-Seq.

84 **Supplementary Data 5:** TRIM24 IHC scoring on human MpBC patient samples and associated  
85 tumor subtypes.

86 **Supplementary Data 6:** List of differentially expressed genes of murine TRIM24-driven tumors  
87 and control mammary glands.

88 **Supplementary Data 7:** List of antibodies used in RPPA and normalized linear scores associated  
89 with Cre control and TRIM24-driven tumors.

90 **Supplementary Data 8:** Differentially expressed genes between TRIM24-driven carcinosarcoma  
91 and carcinoma tumors.

92 **Supplementary Data 9:** List of human TNBC and MpBC patient tumor details including response  
93 to chemotherapy, percentage of vimentin staining and tumor classification.

94
