# Supplementary material for: Mammary-specific expression of Trim24 establishes a mouse model of human metaplastic breast cancer
Source: PubMed Central journal article supplement (PMC8433435; doi:10.1038/s41467-021-25650-z), 2021-09-10
Supplement: 41467_2021_25650_MOESM4_ESM.pdf [file 41467_2021_25650_MOESM4_ESM.pdf]

**Supplementary Table 1: List of antibodies used for western-blot analysis and immunohistochemistry.**

| <b>Antibody</b> | <b>Target</b>           | <b>Company</b>                  | <b>Application</b> |
|-----------------|-------------------------|---------------------------------|--------------------|
| TRIM24          | TRIM24                  | Protein Technologies            | WB, IHC            |
| ER              | Estrogen Receptor Alpha | Santa Cruz                      | IHC                |
| PR              | Progesterone Receptor   | Abcam                           | IHC                |
| ERBB2           | ERBB2                   | Cell Signaling                  | IHC                |
| VIMENTIN        | VIMENTIN                | Abcam                           | IHC                |
| E-CADHERIN      | E-CADHERIN              | Protein Technologies            | IHC                |
| FLAG            | M2(FLAG) epitope        | Santa Cruz                      | IHC                |
| FLAG-HRP        | M2(FLAG) epitope        | Sigma                           | IHC                |
| K8              | Keratin 8               | Sigma                           | WB                 |
| K14             | Keratin 14              | Covance                         | IHC                |
| TRIM24          | TRIM24                  | Protein Technologies 14208-1-AP | CyTOF              |
| p-PI3K(p85/p55) | Phospho-PI3K            | Cell Signaling Tech 4228BF      | CyTOF              |
| pAKT            | Phospho-AKT             | BD Biosciences 560397           | CyTOF              |
| mTOR            | mTOR                    | GenScript A01154                | CyTOF              |
| pan-CK          | Pan-Cytokeratin         | BioLegend 628602                | CyTOF              |

| <b>WB</b>  | <b>Western blot</b>         |
|------------|-----------------------------|
| <b>IHC</b> | <b>Immunohistochemistry</b> |
