# Supplementary material for: Mammary-specific expression of Trim24 establishes a mouse model of human metaplastic breast cancer
Source: PubMed Central journal article supplement (PMC8433435; doi:10.1038/s41467-021-25650-z), 2021-09-10
Supplement: 41467_2021_25650_MOESM5_ESM.pdf [file 41467_2021_25650_MOESM5_ESM.pdf]

**Supplementary Table 2: List of primers used for Piggybac cloning, qRT-PCR and genotyping.**

piggyback Cloning

|                  |                                                                                                   |
|------------------|---------------------------------------------------------------------------------------------------|
| mTRIM24-FL F     | CACCATGGAGGTGGCTGTGGAGAAG                                                                         |
| mTRIM24-3XFlag-R | TACTTGTCATCGTCATCCTTGTAATCGATATCATGATCTTTATAATCACCGTCATG<br>GTCTTTGTAGTCCTTAAGCAGCTGGCGATCCTCGGTG |

|           |                          |
|-----------|--------------------------|
| qRT-PCR   |                          |
| TRI24 F   | CGGCCGGTGGTCCTT          |
| TRI24 R   | CAAACCTGGCATCGAATGAC     |
| VIMF1     | CAGGCCAAGCAGGAGTCAAA     |
| VIMR1     | CTCCAGGGACTCGTTAGTGC     |
| CDH1F1    | AACCCAAGCACGTATCAGGG     |
| CDH1R1    | GAGTGTTGGGGGCATCATCA     |
| TRP53F1   | CATCCTGGCTGTAGGTAGCG     |
| TRP53R1   | TGGCAGTCATCCAGTCTTCG     |
| MifF1     | CGGACCGGGTCTACATCAAC     |
| MifR1     | GGA CTCAAGCGAAGGTGGAA    |
| Vtn1F1    | TGGGGCAGATCATCTTTTGGGA   |
| Vtn1R1    | CGTGATGAAAGTGCTTGCCTGA   |
| CDKN2aF1  | CGCTCTGGCTTTCGTGAAC      |
| CDKN2aR1  | TTGCCCATCATCATCACCTGG    |
| FN1F1     | TACGCCATTGGAGAGGAGTG     |
| FN1R1     | GGCACCATTTAGATGAATCGCA   |
| Aldh1A1F1 | TCAGGAGTTTACATCAACTGGGA  |
| Aldh1A1R1 | ACCCCAAAC TCCAACCAAGA    |
| Lgals1F1  | GCCAAGAGCTTTGTGCTGAA     |
| Lgals1R1  | TGGGCATTGAAGCGAGGATT     |
| LTKF1     | CTACAGCCTCTGGCAGTCAC     |
| LTKR1     | TGGCAGTCTTTGAAAGGGCA     |
| SYT9F1    | GACCCAGATATCTCTGTGAGCCTG |
| SYT9R1    | AGACACCAAAAAGGGCCAGA     |
| SNCGF1    | GTATGTGGGCACCAAAAACCA    |
| SNCCR1    | CAGCTTCACTCACGGCATTG     |
| cMETF1    | GTGCCCCGAAGTGTAAGTCCA    |
| cMETR1    | TGCATGCTCCATTCTGAGAGG    |
| cMETF2    | TGATCATTGGTGCGGTCTCA     |
| cMETR2    | AGCGAACTAATTC ACTGCCCA   |
| aktF1     | GCCGCCTGATCAAGTTCTCC     |
| aktR1     | TTCAGATGATCCATGCGGGG     |
| mTORF1    | CCGCTACTGTGTCTTGGCAT     |
| mTORR1    | CAGCTCGCGGATCTCAAAGA     |
| pi3kcaF1  | TGCAGAGGGTCAGAGCAATG     |
| pi3kcaR1  | CTAGGATTCGTGGGGGCATC     |
| pi3kcaF2  | TCATGGATGCTTTGCAGGGT     |
| pi3kcaR2  | AACCACAGTGGCCTTTTTGC     |

## Genotyping Primers

|                |                           |
|----------------|---------------------------|
| Trim24 F (P23) | AATGAAGACTGGTGTGCTGTTTGT  |
| Trim24 R (P24) | TCGTCTGAGTCGTCACTGAACTTAC |
| Cre F          | GCGGTCTGGCAGTAAAACTATC    |
| Cre R          | GTGAAACAGCATTGCTGTCACTT   |
| P53 X6         | AGCGTGGTGGTACCTTATGAGC    |
| P53 X7         | GGATGGTGGTATACTCAGAGCC    |
| P53 Neo        | GCTATCAGGACATAGCGTTGGC    |
