# Supplementary material for: Mammary-specific expression of Trim24 establishes a mouse model of human metaplastic breast cancer
Source: PubMed Central journal article supplement (PMC8433435; doi:10.1038/s41467-021-25650-z), 2021-09-10
Supplement: 41467_2021_25650_MOESM6_ESM.pdf [file 41467_2021_25650_MOESM6_ESM.pdf]

**Supplementary Table 3: Table of discordant reads to identify Trim24-Flag insertion in mouse genome using 2 biological replicates.**

| ReadID                                 | Flag | Vector        | Start | MapQ | CIGAR   | Chr | Start2    | Seq                                                                           |
|----------------------------------------|------|---------------|-------|------|---------|-----|-----------|-------------------------------------------------------------------------------|
| J00180:83:H22V2BBXY:8:2112:18923:24788 | 81   | trim24_vector | 1253  | 60   | 75M     | 19  | 4180516   | AACTCTTTTTCCGAAGGTAAGTGGCTTCAGCAGAGCGCAGATACCAAATACTGTTCTTCTAGTGTAGCCGTAGTA   |
| J00180:83:H22V2BBXY:8:1209:20466:28797 | 81   | trim24_vector | 1884  | 60   | 75M     | 19  | 22915592  | AGCCCAACGACCGAGCGCAGCGAGTCAGTGCAGGAGGAAAGCGGCAACATACGCAAACCGCTCTCCCC          |
| J00180:83:H22V2BBXY:8:2204:24271:31769 | 129  | trim24_vector | 3148  | 0    | 40M35S  | 1   | 10940389  | CGTCCCTGGAGGTGATGAAGAACGGTGGGGATGTGGCACTCAGGCACGTGGCAGGTGGCCACAGGGGTGGTGGTG   |
| J00180:83:H22V2BBXY:8:2202:20405:16172 | 177  | trim24_vector | 3237  | 0    | 12S63M  | 12  | 38141962  | GTCAAAACCTCAGATCTGGGAGGCGCTTTCCAGCCTTCATGATTTGACGATTGTATGAACATCTACATGGCAATT   |
| J00180:83:H22V2BBXY:8:2202:22587:15451 | 1201 | trim24_vector | 3237  | 0    | 12S63M  | 12  | 38141962  | GTCAAAACCTCAGATCTGGGAGGCGCTTTCCAGCCTTCATGATTTGACGATTGTATGAACATCTACATGGCAATT   |
| J00180:83:H22V2BBXY:8:2106:26991:34231 | 161  | trim24_vector | 3342  | 0    | 71M2D4M | 17  | 69719441  | TCCAGGCAAGCTCTTCCACCCCTTCTGCTTGATCCAGACACCATCAAACATGCAGGCTCAGACACGGGGGAAGCA   |
| J00180:83:H22V2BBXY:8:2203:3711:12919  | 161  | trim24_vector | 3346  | 0    | 42M33S  | 9   | 108241122 | GGCAAGCTCTCCACCCCTTCTGCTTGATCCAGACACCATCCACAGAGACTGACCACCCACAGAGACTGACT       |
| J00180:83:H22V2BBXY:8:2128:16985:46082 | 145  | trim24_vector | 3377  | 0    | 75M     | 8   | 92937552  | CAGACACCATCAAACATGCAGGCTCAGACAGGACGACAGTGTCTGTGGCTTTTTGTCTCTCCATGC            |
| J00180:83:H22V2BBXY:8:2127:32319:6677  | 129  | trim24_vector | 3400  | 0    | 75M     | 9   | 104967896 | TCAGACACAGGACAGCAGAGCCTGTGGCAATTTGTGCGCTCTCCATGCTGGGGTTAACGTGCTTTGTGTC        |
| J00180:83:H22V2BBXY:8:1104:2412:11688  | 145  | trim24_vector | 3469  | 0    | 75M     | 9   | 40477302  | TTTGTCTTCTATCTATCTTCTTATCTTAAAGGCTGTTCTGAACGCTGTGACTTGGAGAGTGTCCAGAGCCCT      |
| J00180:83:H22V2BBXY:8:1108:29640:38609 | 177  | trim24_vector | 3499  | 0    | 75M     | X   | 145552353 | AAGCTGTCTTCAACGCTGTGACTTGGAGAGTGTCCAGAGCCCTCAACACCTGCATGTCCACGCTCATGCTGT      |
| J00180:83:H22V2BBXY:8:2109:6563:49019  | 177  | trim24_vector | 3579  | 0    | 75M     | 2   | 136711412 | ACTCTTATCCCAAGCATCTGCTCTCCGTGATGCATCTGAATTTGGCAAACTGTTCACCAAGACCAACAATN       |
| J00180:83:H22V2BBXY:8:2214:19248:31646 | 145  | trim24_vector | 3775  | 0    | 25S50M  | 18  | 50260846  | GGAGTGTGTGGGTAGGAGAGCAGGGTGCCCAAGAGGCTGTGGATGCCCATCCCTGCAGGCATTCAAGGCCAGG     |
| J00180:83:H22V2BBXY:8:1125:8044:23768  | 113  | trim24_vector | 3791  | 0    | 75M     | 18  | 51408257  | GGATGCCCATCCCTGCAGGCATGAAGGCCAGGCTGGATGTGGCTCTGGCAGCCTGGGCTGCTGTTGATGCC       |
| J00180:83:H22V2BBXY:8:1109:6563:36534  | 129  | trim24_vector | 4481  | 60   | 28S47M  | 16  | 27215565  | CCACCCCGCGCGCTTATATAATCATCGGCTTTCTGCGGAGGGATCTCCGTGGGGCGGTGAACGCCGATGA        |
| J00180:83:H22V2BBXY:8:1109:6563:36534  | 401  | trim24_vector | 4517  | 60   | 39H36M  | 16  | 27215565  | AAGCCGATGATTATAGCGCGCGCGGCTGTGG                                               |
| J00180:83:H22V2BBXY:8:2215:25134:15856 | 81   | trim24_vector | 4663  | 60   | 75M     | 2   | 135704973 | CCGCGGGCGCTCGTGGGACGGAAGCGTGTGGAGAGACCCCAAGGGCTGTAGTCTGGGTCCGCGAGCAAGGT       |
| J00180:83:H22V2BBXY:8:2212:3782:6501   | 1105 | trim24_vector | 5159  | 60   | 75M     | 5   | 101427655 | TTTGGTCGGTTTTAAGTACTATCTTCTAAGTAGCTGAAGCTCCGGTTTTGAACATATGCGCTCGGGTTGGCGA     |
| J00180:83:H22V2BBXY:8:2212:3873:6378   | 81   | trim24_vector | 5159  | 60   | 75M     | 5   | 101427655 | TTTGGTCGGTTTTATGTACTATCTTCTAAGTAGCTGAAGCTCCGGTTTTGAACATATGCGCTCGGGTTGGCGA     |
| J00180:83:H22V2BBXY:8:1224:23064:41352 | 129  | trim24_vector | 5204  | 60   | 53M22S  | 17  | 78104787  | GGTTTTGAACATATGCGCTGGGGTTGGCAGTGTGTTTTGAAGTATTTAGCACTAGAGGTTCTGTATTTG         |
| J00180:83:H22V2BBXY:8:1224:23784:43058 | 1153 | trim24_vector | 5204  | 60   | 53M22S  | 17  | 78104787  | GGTTTTGAACATATGCGCTGGGGTTGGCAGTGTGTTTTGAAGTATTTAGCACTAGAGGTTCTGTATTTG         |
| J00180:83:H22V2BBXY:8:2212:30472:10124 | 145  | trim24_vector | 5249  | 60   | 11S64M  | 11  | 107529015 | GTATTTCTGAATTTTTAGGCACCTTTGAAATGTAATCATTGGGTCAATATGTAATTTTCTAGTGTAGACTAG      |
| J00180:83:H22V2BBXY:8:1209:32552:22766 | 97   | trim24_vector | 9331  | 60   | 57M18S  | X   | 106203640 | NCGATTCGACGCGCATCGCTTCTATCGCTTCTTGACGAGTCTTCTGAGGGGATCGATCCGCTGTAAGTCTGC      |
| J00180:83:H22V2BBXY:8:1222:15615:10018 | 177  | trim24_vector | 10501 | 45   | 13S62M  | 1   | 154057290 | ATCGAGGGACCTAATAACTTCGTATAGCATACTATACGAAGTTATAGATCTAATTAACCTCACTAAAGGGAA      |
| J00180:83:H22V2BBXY:8:1222:15615:10053 | 1201 | trim24_vector | 10501 | 45   | 13S62M  | 1   | 154057290 | ATCGAGGGACCTAATAACTTCGTATAGCATACTATACGAAGTTATAGATCTAATTAACCTCACTAAAGGGAA      |
| J00180:83:H22V2BBXY:8:1222:16082:10194 | 1201 | trim24_vector | 10501 | 45   | 13S62M  | 1   | 154057290 | ATCGAGGGACCTAATAACTTCGTATAGCATACTATACGAAGTTATAGATCTAATTAACCTCACTAAAGGGAA      |
| J00180:83:H22V2BBXY:8:1111:25053:20287 | 177  | trim24_vector | 11171 | 0    | 18S57M  | 9   | 3019927   | ACGAAATCACTGAAAAACGTGAAGACAATGCAGAAGCTAATGGTTTTGTGTAGAGTGTGTTGAATGCTCTGCA     |
| J00180:83:H22V2BBXY:8:1103:19624:20621 | 417  | trim24_vector | 11256 | 0    | 38H37M  | 6   | 37915172  | GAGTTTCAAAAAGACCCACAGTCAGGCAGAAAAGAA                                          |
| J00180:83:H22V2BBXY:8:1103:19624:20621 | 177  | trim24_vector | 11280 | 60   | 29S46M  | 2   | 26524787  | AGAGGAGAGTGTCCACCAAGCAGGAGCAGAAAGAAAGTATCTCCAGAGGCAGTTGGGGTGACCACT            |
| J00180:83:H22V2BBXY:8:1103:19624:20621 | 177  | trim24_vector | 11346 | 0    | 33S42M  | 6   | 37915172  | TTCTTTCTGCTGACTGTGTGCTTTTGTGAACCTCCATAAAAAGGAGCAGTTGAAACTTTACTGTGAAACATG      |
| J00180:83:H22V2BBXY:8:2219:15483:30151 | 353  | trim24_vector | 11392 | 0    | 39H36M  | 6   | 37915309  | AAACTGACCTGTGAGACTGCCAGCTGTAGAACAC                                            |
| J00180:83:H22V2BBXY:8:2107:4046:19162  | 97   | trim24_vector | 11454 | 0    | 75M     | 12  | 118500706 | AGAAGCTTTTGAAGTCAAAAAGTATCATAGATACCTAATCCAAAAGTATGAAAAAACAATAATATAAAA         |
| J00180:83:H22V2BBXY:8:2218:24292:24665 | 177  | trim24_vector | 11509 | 60   | 75M     | 14  | 16689068  | GAAAAACAAAATATAAAGTATACAGGAAATCAGATCCAAAATAAGATAATTGAAATAAATCAAACAAAAG        |
| J00180:83:H22V2BBXY:8:2103:3447:21078  | 1169 | trim24_vector | 11530 | 60   | 30S45M  | 15  | 52936244  | TAAAAGGAACAAGCAAGAAATCATATAATAATATACAGGGAATCAGATCCAAAATAGGATAAATTGAAATAAATCAA |
| J00180:83:H22V2BBXY:8:2103:4553:14414  | 145  | trim24_vector | 11530 | 60   | 30S45M  | 15  | 52936244  | TAAAAGGAACAAGCAAGAAATCATATAATAATATACAGGGAATCAGATCCAAAATAGGATAAATTGAAATAAATCAA |
| J00180:83:H22V2BBXY:8:2222:25814:29624 | 113  | trim24_vector | 11538 | 47   | 75M     | 6   | 121915259 | AAATCAGATCCAAAATAGGATAAATTGAAATAAATCAAACAAAAGCAGGTGGAAACGGATATAAAGTTGCCAT     |
| J00180:83:H22V2BBXY:8:1105:20811:38433 | 81   | trim24_vector | 11579 | 0    | 75M     | 12  | 61252405  | AAAAGAGGTGGACAGGATATAAAGTTGCCATCTTCACTTATGATGTTGAGATAAACCAAAAAGGAAAGCTC       |
| J00180:83:H22V2BBXY:8:2113:12804:2475  | 145  | trim24_vector | 11699 | 0    | 23S52M  | 1   | 109580470 | AAAAACAAAAGAGTTGATTAAATTCATGCAACCAACAGCAGGAAGTGGCTGGGCTTTCTAAGCAGTTAGAGCACGT  |
| J00180:83:H22V2BBXY:8:1103:14194:48878 | 1105 | trim24_vector | 11761 | 52   | 75M     | 12  | 38622091  | TCTAAATGGGCTGTTCCAGTGGCAGCAGCACAGCCTTCTGTACAGCAAGCGGCTGATTACATACAGGTTACGG     |
| J00180:83:H22V2BBXY:8:1104:13119:1543  | 1105 | trim24_vector | 11761 | 52   | 75M     | 12  | 38622091  | TCTAAATGGGCTGTTCCAGTGGCAGCAGCACAGCCTTCTGTACAGCAAGCGGCTGATTACATACAGGTTACGG     |
| J00180:83:H22V2BBXY:8:2104:9841:3987   | 81   | trim24_vector | 11761 | 52   | 75M     | 12  | 38622091  | TCTAAATGGGCTGTTCCAGTGGCAGCAGCACAGCCTTCTGTACAGCAAGCGGCTGATTACATACAGGTTACGG     |
| J00180:83:H22V2BBXY:8:1124:25763:19408 | 65   | trim24_vector | 11783 | 60   | 75M     | 16  | 88039581  | GCAGCAGCACAGCCTTCTGTACAGCAAGCGGCTGATTACATACAGGTTACGGCACCTTCTCGTCAAGGTGTG      |
| J00180:83:H22V2BBXY:8:1124:26200:19707 | 1089 | trim24_vector | 11783 | 60   | 75M     | 16  | 88039581  | GCAGCAGCACAGCCTTCTGTACAGCAAGCGGCTGATTACATACAGGTTACGGCACCTTCTCGTCAAGGTGTG      |
| J00180:83:H22V2BBXY:8:1225:32522:17509 | 81   | trim24_vector | 11991 | 0    | 68M7S   | 6   | 37945170  | TGTCGTGGAGCAGAGTTACAGCCACCAGGTGGTTTACCTTCCAACAGTTATCCAAGTCCCAACACGCAACCN      |
| J00180:83:H22V2BBXY:8:2213:2808:30450  | 81   | trim24_vector | 11991 | 0    | 75M     | 2   | 102117011 | TGTCGTGGAGCAGAGTTACAGCCACCAGGTGGTTTACCTTCCAACAGTTATCCAAGTCCCAACACAGATCAG      |
| J00180:83:H22V2BBXY:8:2228:7608:37783  | 65   | trim24_vector | 12455 | 0    | 75M     | 6   | 37951525  | TCACAAGTGCAGCTTGTACGAGCAAAAGCTTTAGTCCCAATGATTGATGTTGCAAAATGAGTGTGGGGAAAGG     |
| J00180:83:H22V2BBXY:8:2218:21856:38521 | 81   | trim24_vector | 12548 | 23   | 75M     | 6   | 53731021  | TTCCAGATATTGATTGTTCAAGTACTATAATGTTGGACAACATTGCAAGGAAAGACACAGGTGTAGATCACGCC    |
| J00180:83:H22V2BBXY:8:2218:24819:39154 | 177  | trim24_vector | 12846 | 0    | 24S51M  | 6   | 37957061  | TTTGCTGGGGCAAATCTTATCATACAGGAAAACAGTGGACCACCTGAAAATGATTTTTCTGTTGTTATAGT       |
| J00180:83:H22V2BBXY:8:1104:14712:6730  | 161  | trim24_vector | 13049 | 0    | 75M     | 6   | 37957722  | GACTCCATCAAGAAAATCTCAAATGGAAAGTCTGAGTGGTGGATGCTCCCAAGACTCCCTGTGCATGTGCG       |
| J00180:83:H22V2BBXY:8:2118:9820:16049  | 113  | trim24_vector | 13123 | 0    | 7568M   | 5   | 117337515 | AAGAGAGGAGCAGAGTGAAGGAAAGAGGACTTAAAGTCCCAATGAGTGTGGTGTGTTGTTGCAAAATGGTGGGAACT |
| J00180:83:H22V2BBXY:8:1104:6370:16717  | 177  | trim24_vector | 13149 | 0    | 75M     | 6   | 95682727  | CAATGAAGACTGGTGTGCTGTTGTCAAATGGTGGGAACTCCTATGCTGTGAGAAATGCTCAAAGTATTCCA       |
| J00180:83:H22V2BBXY:8:2220:29406:27338 | 161  | trim24_vector | 13273 | 0    | 75M     | 15  | 16219793  | ATCTGACTTTCTGCGGAGACTTACTAAGCCAGAGTTGACTATGATTGTGATGTTCCAGTCAACTCAGAG         |

|                                        |      |               |       |    |          |    |           |                                                                             |
|----------------------------------------|------|---------------|-------|----|----------|----|-----------|-----------------------------------------------------------------------------|
| J00180:83:H22V2BBXY:8:1110:3386:18757  | 65   | trim24_vector | 13401 | 6  | 75M      | 5  | 142170463 | TGAACGCCTACTTCTGTTTCTTACTGCCATGAAATGAGCCTGGCTTCCAAGACCTGTTCTCTAACTGTGCC     |
| J00180:83:H22V2BBXY:8:2207:22638:14871 | 65   | trim24_vector | 13557 | 0  | 58M17S   | 8  | 29103654  | AAAGCCTGAAGACTTTGTAGCTGATTTTAGATTGATCTTTCAAACCTGTGCTGAATTTCTGGTCATAGTATCATT |
| J00180:83:H22V2BBXY:8:1213:10500:19654 | 81   | trim24_vector | 13849 | 60 | 75M      | 6  | 37965626  | GATTATAAAGATCATGATATCGATTACAAGGATGACGATGACAAGTAAAAGGGTGGGCGCGCCGACCCAGCTTTC |
| J00180:83:H22V2BBXY:8:2217:26078:28745 | 113  | trim24_vector | 13908 | 60 | 75M      | 19 | 18201969  | CGCCGACCCAGCTTCTTGTACAAGTGGTTGATGGGGGATCCACTAGTTCTAGAGCGGCCGCTAGTGGATCC     |
| J00180:83:H22V2BBXY:8:2224:11363:26529 | 113  | trim24_vector | 14040 | 60 | 75M      | 10 | 83043536  | TCTCCTGGCCCTGGAAGTTGCCACTCCAGTGCCACCAGCCTTGTCTAATAAAAATTAAGTTGCATCATTTTGTCT |
| J00180:83:H22V2BBXY:8:1118:5731:31540  | 113  | trim24_vector | 14055 | 60 | 4S71M    | 11 | 115062867 | TCTCAGTTGCCACTCCAGTGCCACCAGCCTTGTCTAATAAAAATTAAGTTGCATCATTTTGTCTGACTAGGTGT  |
| J00180:83:H22V2BBXY:8:2102:18345:26072 | 65   | trim24_vector | 14133 | 60 | 53M22S   | 1  | 172023718 | TAATATTATGGGGTGGAGGGGGTGGTATGGAGCAAGGGGCAAGTTGGGAAGAGTATGTTCTCAGCATCTGACA   |
| J00180:83:H22V2BBXY:8:2102:12936:11143 | 81   | trim24_vector | 14163 | 60 | 4S71M    | X  | 23931629  | ATATGAGCAAGGGGCAAGTTGGGAAGACAACCTGTAGGGCCTGCGGGTCTATTGGGAACCAAGCTGGAGTGCAG  |
| J00180:83:H22V2BBXY:8:2214:23043:24190 | 1153 | trim24_vector | 14171 | 60 | 75M      | 15 | 61540052  | GGCAAGTTGGGAAGACAACCTGTAGGGCCTGCGGGTCTATTGGGAACCAAGCTGGAGTGCAGTGGCACAATCTT  |
| J00180:83:H22V2BBXY:8:2214:23094:24067 | 129  | trim24_vector | 14171 | 60 | 75M      | 15 | 61540052  | GGCAAGTTGGGAAGACAACCTGTAGGGCCTGCGGGTCTATTGGGAACCAAGCTGGAGTGCAGTGGCACAATCTT  |
| J00180:83:H22V2BBXY:8:1228:5284:13886  | 81   | trim24_vector | 14179 | 60 | 40S35M   | 10 | 66798547  | TGGAAGTCATTAAGAGCCTCTAACATGAGGCCAGGAATCGGGAAGACAACCTGTAGGGCCTGCGGGTCTATTG   |
| J00180:83:H22V2BBXY:8:1111:9171:40561  | 97   | trim24_vector | 14247 | 60 | 75M      | 4  | 148883451 | GCTCACTGCAATCTCCGCTCTGGGTTCAAGCGATTCTCTGCCTCAGCCTCCCGAGTTGTTGGGATTCCAGGC    |
| J00180:83:H22V2BBXY:8:1112:10226:11618 | 113  | trim24_vector | 14286 | 0  | 21S54M   | 13 | 28516230  | GGCCTCAAACCTCAGAAATCCGCTCTGCCTCCCGAGTTGTTGGGATTCCAGGCATGCATGACCAGGCTCAA     |
| J00180:83:H22V2BBXY:8:2123:25997:4163  | 65   | trim24_vector | 14543 | 60 | 75M      | 17 | 75824074  | GCCATGCCCAACCGTGGGACATTTGAGTTGCTTGGCACTGTCTCTCATGCGTTGGGTTCCACTCAGTAGA      |
| J00180:83:H22V2BBXY:8:2209:17919:3459  | 145  | trim24_vector | 14547 | 60 | 75M      | 17 | 5140667   | TGCCCAACCGTGGGACATTTGAGTTGCTTGGCACTGTCTCTCATGCGTTGAGTCCACTCAGTAGATGCC       |
| J00180:83:H22V2BBXY:8:1223:22607:19988 | 145  | trim24_vector | 14601 | 60 | 3S33M39S | 1  | 122275171 | GTGTGGGTCCACTCAGTAGATGCTGTTGAATTCGATATCAAGCTTATCGATAAGCTTATATCCATGCTAGGGT   |
| J00180:83:H22V2BBXY:8:1223:22719:19935 | 1169 | trim24_vector | 14601 | 60 | 3S33M39S | 1  | 122275171 | GTGTGGGTCCACTCAGTAGATGCTGTTGAATTCGATATCAAGCTTATCGATAAGCTTATATCCATGCTAGGGT   |
| J00180:83:H22V2BBXY:8:1208:8501:23329  | 145  | trim24_vector | 14680 | 0  | 75M      | 12 | 3109884   | AGAGATAATGGCCTTACGTTGTGACAGGGGAGGGGCGGGTGGACTCAGCAAGACTTACCTCTCCAAAGAGCGG   |
| J00180:83:H22V2BBXY:8:1121:11657:32314 | 161  | trim24_vector | 14811 | 0  | 53M22S   | 8  | 128312809 | TGAAGAACTGTGGGATGTGGCACTGAGGGACATGCCAGTGGGCACGGTGGGAGGGAGGGAGGAAGGAAGGAAG   |
| J00180:83:H22V2BBXY:8:2225:27499:12321 | 177  | trim24_vector | 14905 | 0  | 75M      | 8  | 126607545 | GCCTTCATGATTGACGATTGTATGAACATCTACATGGCAATCTCCAGCTGCTGCCAGTCTACTGACCCA       |
| J00180:83:H22V2BBXY:8:1203:19218:28745 | 65   | trim24_vector | 14936 | 0  | 56M19S   | 6  | 48350261  | TACATGGCAATCTCCAGCTGCTGCCAGTCTACTGACCCAGCTGATCTCTCATATTTAGTGCACATGTT        |
| J00180:83:H22V2BBXY:8:2110:18791:39717 | 161  | trim24_vector | 15019 | 0  | 75M      | 7  | 139845108 | TGCATCCAGACACCATCAAACATGCAGGCTCAGACACAGGGACCAGCAGTGTCTGTGGCCTTTTGTGCTCCTCT  |
| J00180:83:H22V2BBXY:8:1218:25408:40315 | 113  | trim24_vector | 15221 | 0  | 19S56M   | 6  | 28231845  | TCTTTAAACCAACCTGTTTCTGCACTTCTTATCCCAAGATCTGCCTCCGTGATGCACTGAATTGGCAA        |
| J00180:83:H22V2BBXY:8:1106:7710:43515  | 177  | trim24_vector | 15369 | 0  | 75M      | 6  | 123563684 | TTGATATGAGGAGGCAGTTTTTCCCCAGAGGGTGGTGACGCACTAACAGGTTGCCAAGGAGGCTGTGGATG     |
| J00180:83:H22V2BBXY:8:2103:4087:25316  | 1105 | trim24_vector | 15884 | 60 | 75M      | 2  | 5954067   | CCCGGGCTGCAGGAATTCGATAAAAGTTTTGTTACTTTATAGAAGAAATTTGAGTTTTTGTTTTTTAATAAA    |
| J00180:83:H22V2BBXY:8:2103:4198:23997  | 81   | trim24_vector | 15884 | 60 | 75M      | 2  | 5954067   | CCCGGGCTGCAGGAATTCGATAAAAGTTTTGTTACTTTATAGAAGAAATTTGAGTTTTTGTTTTTTAATAAA    |

| ReadID                                 | Flag | Vector        | Start | MapQ | CIGAR  | Chr | Start2    | Seq                                                                         |
|----------------------------------------|------|---------------|-------|------|--------|-----|-----------|-----------------------------------------------------------------------------|
| J00180:83:H22V2BBXY:8:2228:18933:28674 | 81   | trim24_vector | 2738  | 60   | 75M    | 1   | 182070041 | ATCTCAGTCGCCCTTGGAGCTCCCGTGAGCGTGCTTGTCAATGCGGTAAAGTGTCACTGATTTTTGAACATAAC  |
| J00180:83:H22V2BBXY:8:2119:2483:25914  | 113  | trim24_vector | 4709  | 60   | 15560M | 1   | 85109564  | GGTTTTCTGGGGACTTGGGCTGTAGTCTGGGTCGCGAGCAAGTTGCCCTGAACCTGGGGTTGGGGGGAGCGCAG  |
| J00180:83:H22V2BBXY:8:2122:26798:43040 | 113  | trim24_vector | 5183  | 60   | 75M    | 1   | 41153484  | TTCTTAAGTAGCTGAAGCTCCGGTTTTGAACTATGCGCTCGGGTTGGCGAGTGTGTTTTGTGAAGTTTTTAGG   |
| J00180:83:H22V2BBXY:8:1213:5954:36218  | 129  | trim24_vector | 11332 | 0    | 75M    | 1   | 173235504 | CCAGTGTGTTTGTCCCTCCATAAAAAGGAGCAGTTGAACTTTACTGTGAAACATGTGATAAACTGACCTGCGA   |
| J00180:83:H22V2BBXY:8:1118:29751:34055 | 145  | trim24_vector | 11634 | 27   | 33542M | 1   | 133019799 | CAGGGCTACAGCAAGAACCTGCTCGGAAAAAAACAAAAAGGAAAGCTGTGCTCCAGCTGTAGAGTCT         |
| J00180:83:H22V2BBXY:8:1127:3731:15557  | 1121 | trim24_vector | 13274 | 0    | 54M21S | 1   | 137636167 | TCTGTACTTCTGCCGAGACTTATCTAAGCCAGAGGTTGACTATGATTGTGATGGGTAATCTATTAGTTTGGAA   |
| J00180:83:H22V2BBXY:8:1217:23378:1736  | 161  | trim24_vector | 13274 | 0    | 54M21S | 1   | 137636167 | TCTGTACTTCTGCCGAGACTTATCTAAGCCAGAGGTTGACTATGATTGTGATGGGTAATCTATTAGTTTGGAA   |
| J00180:83:H22V2BBXY:8:1127:1235:27795  | 65   | trim24_vector | 13593 | 60   | 57M18S | 1   | 169099437 | CTTCAAACACTGTGCTGAATCAATGAGCCTGATTCTGAAGTAGCCAATGCTGGTATCTAACTCGTAGGCTTCT   |
| J00180:83:H22V2BBXY:8:2101:6685:17966  | 65   | trim24_vector | 13982 | 60   | 75M    | 1   | 34593441  | CCCCGGCTCAGCCCGGGGATCTGGGTGGCATCCCTGTGACCCCTCCCAAGTGCTCTCCGGCCGGAAG         |
| J00180:83:H22V2BBXY:8:1119:5700:29729  | 145  | trim24_vector | 14141 | 60   | 13S62M | 1   | 46445954  | CCTGGGCTTTTTTTGGGGTGAGGGGGGGTGGTATGGAGCAAGGGGCAAGTTGGGAAGACAACCTGTAGGGCCTGC |
| J00180:83:H22V2BBXY:8:1218:7283:40139  | 161  | trim24_vector | 14155 | 60   | 75M    | 1   | 74201579  | GTGGTATGGAGCAAGGGGCAAGTTGGGAAGACAACCTGTAGGGCCTCGGGGTCTATTGGAAACCAAGCTGGAGT  |
| J00180:83:H22V2BBXY:8:2218:10287:20586 | 161  | trim24_vector | 16070 | 60   | 75M    | 1   | 182070175 | ATAAAAACACATGCATCAATTTTACACATGATTATCTTAAACGTACGTACAATATTGATTATCTTTCTAGGTTAA |
| J00180:83:H22V2BBXY:8:1226:6360:44095  | 145  | trim24_vector | 3579  | 0    | 16S59M | 2   | 49418985  | TTGAGTTCAGCTCTGACTTCTTATCCCAAGATCTGCTCCGTGATGCATCAATTTGGCAACACTGTGTCA       |
| J00180:83:H22V2BBXY:8:1214:20009:18159 | 81   | trim24_vector | 13978 | 9    | 45S30M | 2   | 155050907 | ACCTAGTGGAAAGCTAAAAGCAAGGAAATCTAGAGTACCCGGTTGTGATCCCGGGCTGCAGCCCGGGGATCTG   |
| J00180:83:H22V2BBXY:8:2116:10338:4180  | 161  | trim24_vector | 14164 | 60   | 47M28S | 2   | 142999523 | AGCAAGGGGCAAGTTGGGAAGACAACCTGTAGGGCCTCGGGGTCTAAGGTTTTAATAAGTGTAAACAAATATG   |
| J00180:83:H22V2BBXY:8:2116:11688:3846  | 1185 | trim24_vector | 14164 | 60   | 47M28S | 2   | 142999523 | AGCAAGGGGCAAGTTGGGAAGACAACCTGTAGGGCCTCGGGGTCTAAGGTTTTAATAAGTGTAAACAAATATG   |
| J00180:83:H22V2BBXY:8:2227:30919:44060 | 129  | trim24_vector | 14390 | 60   | 47M28S | 2   | 128119787 | TGGTCTCAACTCTAATCTCAGGTGATCTACCCACTTGGCCTCCCAAGCTCCAGTACTGTTGTGCCACTTG      |
| J00180:83:H22V2BBXY:8:2106:21227:39471 | 65   | trim24_vector | 14425 | 60   | 68M7S  | 2   | 70319739  | CCTTGGCTCCCAATTTGCTGGGATTACAGGCGTGAACCACTGTTCCCTCCCTGCTCTTCTGATTTTTCTGTAT   |
| J00180:83:H22V2BBXY:8:1209:12662:36552 | 129  | trim24_vector | 14455 | 60   | 57M18S | 2   | 70255817  | CGGTGAACCACTGCTCCCTCCCTGCTCTTCTGATTTAAATAACTATACCAGCAGATTTGGTCCAAACACATC    |
| J00180:83:H22V2BBXY:8:2108:10318:14484 | 145  | trim24_vector | 3116  | 0    | 75M    | 3   | 132262919 | GGCACAGCTGCCACGAGGTGGGGGGGTACCGTCCCTGGAGGTGATGAAGAACTGTGGGATGTGGCACTGAG     |
| J00180:83:H22V2BBXY:8:2109:22465:47665 | 145  | trim24_vector | 3481  | 0    | 75M    | 3   | 60168935  | TCCTATCTTCTTACCTTAAAGCTGTTCTGAACGCTGTGACTTGGAGAGTGTCCAGAGCCCTCAACACTGCAT    |
| J00180:83:H22V2BBXY:8:1123:19999:22502 | 129  | trim24_vector | 12328 | 58   | 75M    | 3   | 152755808 | ATAAAGCCCAACTCTTGCATGCTTTTGGTCAACAGGCCATAAAACAGTGGCAGATCAGCAGTGTACAG        |
| J00180:83:H22V2BBXY:8:1227:14935:29694 | 129  | trim24_vector | 14150 | 60   | 75M    | 3   | 103404085 | GGGGGTTGGTATGGAAGCAAGGAAAGACTTGGGAAGACAACCTGTTCCCTCCCTGCTCTTCTGATTTTTCTGTAT |
| J00180:83:H22V2BBXY:8:2204:1844:5464   | 145  | trim24_vector | 14391 | 60   | 75M    | 3   | 133449106 | GGTCTCAACTCTAATCTCAGGTGATCTACCCACTTGGCCTCCCAATTTGCTGGGATTACAGACGTGAACCCAC   |
| J00180:83:H22V2BBXY:8:2124:22435:39418 | 97   | trim24_vector | 14468 | 60   | 61M14S | 3   | 148236135 | CTCCCTCCCTGCTCTTCTGATTTTTAAATAACTATACCAGCAGGAGGACGTCCAGACACAAGCACAGTTTTAA   |
| J00180:83:H22V2BBXY:8:2224:24637:2650  | 81   | trim24_vector | 15006 | 0    | 26S49M | 3   | 19230214  | GTGGAAGAATTCCTCGTACTTTTTACCCTTCTGCTTGCATCCAGACACCATCAAACTGCAGGCTCAGACA      |
| J00180:83:H22V2BBXY:8:1205:14083:19249 | 161  | trim24_vector | 13502 | 0    | 75M    | 4   | 31524170  | CAATGGACTTGTCAACCATCAAGAAAAGACTTCAAGAGGATTTGATGATATACAAAGCCGTGAAGACTTTGTAG  |
| J00180:83:H22V2BBXY:8:2105:1732:12093  | 129  | trim24_vector | 14264 | 60   | 75M    | 4   | 155776224 | CCTCCTGGGTTCAAGCGATTCTCCTGCTCAGCCTCCGAGTTGTTGGGATTCAGGCATGATGACCCAGGCTCA    |
| J00180:83:H22V2BBXY:8:2106:13098:29747 | 129  | trim24_vector | 14278 | 60   | 75M    | 4   | 5316364   | CGGATTCCTGCTCAGCCTCCGAGTTGTTGGGATTCAGGCATGATGACCAGGCTCAGTAATTTTTGTTT        |
| J00180:83:H22V2BBXY:8:1206:16244:17896 | 81   | trim24_vector | 14326 | 60   | 75M    | 4   | 137157517 | ATGACCAAGCTCAGTAATTTTTGTTTTTTGGTAGAGACGGGTTCCACCATTTGGCAGGCTGGTCTCCAAC      |
| J00180:83:H22V2BBXY:8:2109:28341:16946 | 161  | trim24_vector | 14387 | 60   | 75M    | 4   | 58884014  | GGCTGTCTCAACTCTAATCTCAGGTGATCTACCCACTTGGCTCCCAATTTGCTGGGATTACAGCGCTGAA      |
| J00180:83:H22V2BBXY:8:1128:28442:27672 | 81   | trim24_vector | 14460 | 60   | 30S45M | 4   | 40684322  | CGCTGTGAGTTAGTCAGATTTGAATCATAACCCTGCTCCCTCCCTGCTCTGATTTAAAATAACTATA         |
| J00180:83:H22V2BBXY:8:2202:27854:24331 | 177  | trim24_vector | 14465 | 60   | 75M    | 4   | 150193160 | CTGCTCCCTCCCTGCTCTTCTGATTTAAAATAACTATACCAGCAGGAGGACGTCAGACACAGCATAGGCTAC    |
| J00180:83:H22V2BBXY:8:2202:27864:24278 | 1201 | trim24_vector | 14465 | 60   | 75M    | 4   | 150193160 | CTGCTCCCTCCCTGCTCTTCTGATTTAAAATAACTATACCAGCAGGAGGACGTCAGACACAGCATAGGCTAC    |
| J00180:83:H22V2BBXY:8:2126:8988:45906  | 145  | trim24_vector | 11520 | 60   | 75M    | 5   | 140701312 | ATATATAAAGTATACAGGAAATCAGATCCAAAATAGGATAAATTGAATAAATCAAACCAAAAGCAGGTGGAAAC  |
| J00180:83:H22V2BBXY:8:1128:5416:13482  | 1153 | trim24_vector | 14069 | 60   | 75M    | 5   | 44402139  | TGCCACCAGCCTTGCTCAATAAAAATTAAGTTGCATCATTTTTGCTGACTTGGTCTCCTCTATAATATTATGG   |
| J00180:83:H22V2BBXY:8:1128:6766:17192  | 129  | trim24_vector | 14069 | 60   | 75M    | 5   | 44402139  | TGCCACCAGCCTTGCTCAATAAAAATTAAGTTGCATCATTTTTGCTGACTAGGTGCTCTCTATAATATTATGG   |
| J00180:83:H22V2BBXY:8:1211:15930:36059 | 97   | trim24_vector | 14344 | 60   | 50M25S | 5   | 149971426 | TTTTGTTTTTTTTGGTAGAGACGGGTTTACCATATTGGCCAGGCTGTTTTTTGTGCACAGACATTTTTCAITTT  |
| J00180:83:H22V2BBXY:8:1107:6786:29008  | 113  | trim24_vector | 14532 | 60   | 75M    | 5   | 102609117 | TAGGCTACCTGGCCATGCCAACCCGGTGGGACATTTGAGTTCGCTTGGCTGCTCTCATCGTGTGGGCTC       |
| J00180:83:H22V2BBXY:8:1119:19603:7468  | 161  | trim24_vector | 14599 | 60   | 35M40S | 5   | 72639067  | GTTGGTCCAATCAGTATGATCGCTGTAAGTTGATTAAGCTATTAAGCTTATCCAGTCTAGGTTCTGGATGTTG   |
| J00180:83:H22V2BBXY:8:2127:22150:19795 | 145  | trim24_vector | 15566 | 0    | 19S56M | 5   | 87788798  | CCCGAGTTCACATGTAGACAGCCGCTTCTATGATTCTGCTTAACTCTCTTTCAGCCTAAAGCTTTTT         |
| J00180:83:H22V2BBXY:8:2113:29112:35339 | 81   | trim24_vector | 11526 | 33   | 52M23S | 6   | 37915218  | AAAGTATACAGGAAATCAGATCCAAAATAGGATAATTGAAAAGAACTAACTGGATAGAGACAATCATCCAT     |
| J00180:83:H22V2BBXY:8:1106:17868:43462 | 145  | trim24_vector | 11530 | 60   | 47M28S | 6   | 37919394  | TATACAGGAAATCAGATCCAAAATAGGATAATTGAAAATAAATCAAAGAAAGAGAAGATGGAGAAACAGGAAAAG |
| J00180:83:H22V2BBXY:8:2107:19735:21553 | 81   | trim24_vector | 11781 | 60   | 75M    | 6   | 37931362  | TGGCAGCAGCACAGCCTTCTGCTACAGCAAGCGGCTGATTACATACAGGTTAAGGCACCTTCTCGTCAAGGTG   |
| J00180:83:H22V2BBXY:8:1212:30482:12568 | 177  | trim24_vector | 12110 | 0    | 37S38M | 6   | 37945658  | CCCCCCCAGCTAGGCCCTTCTCTAGCCCTGGAAGTTGCCACTCCAGTCAACAGGTGCAACAGGTGCAACAGGTG  |
| J00180:83:H22V2BBXY:8:2128:26169:39277 | 161  | trim24_vector | 12315 | 23   | 75M    | 6   | 84113763  | TCGGCAGACAACAATAAAGCCCAACCCCTTCAAATGGCTTTTTGGCTCAACAGGCCATAAAAACAGTGGCAGAT  |
| J00180:83:H22V2BBXY:8:2107:1773:43251  | 353  | trim24_vector | 13151 | 0    | 43H32M | 6   | 37957726  | ATGAAGACTGGTGTCTGTTTTGCAAAATGGT                                             |
| J00180:83:H22V2BBXY:8:2109:24312:33000 | 161  | trim24_vector | 13470 | 3    | 32S43M | 6   | 37964754  | CCTGTTACTTAGCCTCTCTGGGTTGTAGATTGTGCCTGATTATTATAAAAATAAATAAAAACCAATGGACTTG   |
| J00180:83:H22V2BBXY:8:1228:20943:42987 | 97   | trim24_vector | 14020 | 60   | 68M7S  | 6   | 125068723 | TGTGACCCCTCCAGTCACTGACCTTCTAGCCCTGGAAGTTGCCACTCCAGTGCCACCAGCCTTCTCTGCTAGTT  |
| J00180:83:H22V2BBXY:8:2117:14681:3899  | 145  | trim24_vector | 14218 | 60   | 75M    | 6   | 132222160 | CCAAGCTGGAGTGCAGTGCCACAATCTTGGCTCACTGCAATCTCCGCTCCTGGTTCAAGCGATTCTCTGCTCT   |
| J00180:83:H22V2BBXY:8:1208:1955:19689  | 145  | trim24_vector | 14334 | 60   | 75M    | 6   | 119637417 | GCTCAGTAATTTTTGTTTTTTGGTAGAGACGGGTTTACCATATTGGCCAGGCTGGTCTCCAACCTCTAATC     |
| J00180:83:H22V2BBXY:8:1208:2087:19918  | 1169 | trim24_vector | 14334 | 60   | 75M    | 6   | 119637417 | GCTCAGTAATTTTTGTTTTTTGGTAGAGACGGGTTTACCATATTGGCCAGGCTGGTCTCCAACCTCTAATC     |
| J00180:83:H22V2BBXY:8:2207:2960:15346  | 97   | trim24_vector | 14366 | 60   | 75M    | 6   | 82480666  | GGGGTTTTACCATATTGGCCAGGCTGGTCTCAACTCTAATCTCAGGTGATCTACCCACTTGGCCTCCAAAT     |

|                                        |                    |       |           |    |           |                                                                          |
|----------------------------------------|--------------------|-------|-----------|----|-----------|--------------------------------------------------------------------------|
| J00180:83:H22V2BBXY:8:2214:3539:17403  | 113 trim24_vector  | 15389 | 0 75M     | 6  | 4426030   | TTTCCCCAGAGGGTGGTGACGCACTGAACAGTTGCCAAGGAGGCTGTGGATGCCCATCCCTGCAGGCATTC  |
| J00180:83:H22V2BBXY:8:2105:7070:17016  | 1137 trim24_vector | 14139 | 60 75M    | 7  | 127519486 | TATGGGGTGGAGGGGGTGGTATGGAGCAAGGGGCAAGTTGGGAAGACAACCTGTAGGGCTGCGGGTCTATTG |
| J00180:83:H22V2BBXY:8:2105:7436:16665  | 113 trim24_vector  | 14139 | 60 75M    | 7  | 127519486 | TATGGGGTGGAGGGGGTGGTATGGAGCAAGGGGCAAGTTGGGAAGACAACCTGTAGGGCTGCGGGTCTATTG |
| J00180:83:H22V2BBXY:8:2105:7902:17016  | 1137 trim24_vector | 14139 | 60 75M    | 7  | 127519486 | TATGGGGTGGAGGGGGTGGTATGGAGCAAGGGGCAAGTTGGGAAGACAACCTGTAGGGCTGCGGGTCTATTG |
| J00180:83:H22V2BBXY:8:1119:6076:28692  | 177 trim24_vector  | 14141 | 0 13562M  | 7  | 103109060 | CCTGGGCTTTTTTGGGGTGGGGGGTGGTATGGAGCAAGGGGCAAGTTGGGAAGACAACCTGTAGGGCTGCG  |
| J00180:83:H22V2BBXY:8:2217:12428:36429 | 65 trim24_vector   | 14332 | 60 54M21S | 7  | 45378472  | AGGCTCAGTAATTTTTGTTTTTGGTAGAGACGGGTTCCACCATTTGGCCTAGCTCATTGTTAGACTGTGA   |
| J00180:83:H22V2BBXY:8:2217:12652:35479 | 1089 trim24_vector | 14332 | 60 54M21S | 7  | 45378472  | AGGCTCAGTAATTTTTGTTTTTGGTAGAGACGGGTTCCACCATTTGGCCTAGCTCATTGTTAGACTGTGA   |
| J00180:83:H22V2BBXY:8:1111:12246:19724 | 129 trim24_vector  | 14550 | 60 68M7S  | 7  | 64886209  | CCAACCGTGGGACATTTGAGTTGCTTGCTGGCAGTGTCTCTCATGCGTTGGTCCACTCAGTAGACTGTTGC  |
| J00180:83:H22V2BBXY:8:1126:11363:28956 | 161 trim24_vector  | 14804 | 0 49M26S  | 7  | 52306132  | GAGGTGATGAAGAAGTGTGGGATGTGGCAGTGGGACATGGCCAGTGTTCAGTGGGGTGGGGGAGGGGGC    |
| J00180:83:H22V2BBXY:8:2108:11018:20691 | 113 trim24_vector  | 3787  | 0 75M     | 8  | 105568136 | CTGTGGATGCCCATCCCTGCAGGCATTAAGGCCAGGCTGATGTGGCTCTGGGCAGCTGGGCTGCTGGTTGA  |
| J00180:83:H22V2BBXY:8:1118:14001:11864 | 97 trim24_vector   | 4239  | 60 75M    | 8  | 105794146 | GGTTTTGCGCCTCCCGCGGCGCCCCCTCTCACGCGAGCGTCCACGTCAGACGAAGGCGCAGCGAGCG      |
| J00180:83:H22V2BBXY:8:1118:16731:11319 | 1121 trim24_vector | 4239  | 60 75M    | 8  | 105794146 | GGTTTTGCGCCTCCCGCGGCGCCCCCTCTCACGCGAGCGTCCACGTCAGACGAAGGCGCAGCGAGCG      |
| J00180:83:H22V2BBXY:8:1223:22861:7240  | 81 trim24_vector   | 11805 | 33 75M    | 8  | 113421416 | CAGCAAGCGGCTGATTACATACAGATTACGGCACCTTCTCGTCAAGGTGTGATGCTTCTCTGTGACCAACAC |
| J00180:83:H22V2BBXY:8:1203:14529:49036 | 97 trim24_vector   | 14231 | 60 60M15S | 8  | 12838153  | NAGTGGCACAATTTGGCTACTGCAATCTCCGCTCTGGTTCAAGCGATTCTCTGTAGGACACTTCCAT      |
| J00180:83:H22V2BBXY:8:2211:14742:15574 | 97 trim24_vector   | 14603 | 60 31M44S | 8  | 84701308  | GTTCCACTCAGTAGTGCCTGTTGAATTCGATCAAGCTTATCGATAAGCTTATTCATGCTAGGGTTCTGG    |
| J00180:83:H22V2BBXY:8:2209:12875:20674 | 113 trim24_vector  | 4466  | 60 75M    | 9  | 3024100   | AAAAGTAGTCCCTTCTCGGCGATTCTCGGAGGGATCTCCGTGGGCGGTGAACCCGATGATTATAAGGACG   |
| J00180:83:H22V2BBXY:8:2108:12428:35514 | 81 trim24_vector   | 13167 | 0 33S42M  | 9  | 99983112  | GGTAGTAAATGACAGCTGTATCCTAAGGATGCTTTGTTTCAAATGGTGGGAACTCCTATGCTGTGAGAAATG |
| J00180:83:H22V2BBXY:8:1115:30969:43902 | 161 trim24_vector  | 14036 | 60 75M    | 9  | 90829644  | TGCTCTCTGGCCCTGGAAGTTGCCACTCCAGTGGCCACCAGCTTGTCTAATAAAAATTAAGTTGCATCATT  |
| J00180:83:H22V2BBXY:8:2121:25256:9491  | 161 trim24_vector  | 14099 | 60 50M25S | 9  | 83755445  | GTTGCATCATTGTTGCTGACTAGGTGCTCTCTATAATATTATGGGGTGGGGGTAGAAATGAGAGAGGACAT  |
| J00180:83:H22V2BBXY:8:2204:13301:22151 | 65 trim24_vector   | 14169 | 60 47M28S | 9  | 58213813  | GGGCAAGTTGGGAAGACAACCTGTAGGGCTGCGGGTCTATTGGGAAGGGACTAGGCTGAGGGACTCTCCTC  |
| J00180:83:H22V2BBXY:8:1109:6664:20357  | 129 trim24_vector  | 14256 | 60 71M4S  | 9  | 93887241  | AATCTCCGCTCTGGTTCAAGCGATTCTCTGCTCAGCCTCCGAGTTGTTGGATACCAGGCATGCAATTG     |
| J00180:83:H22V2BBXY:8:1218:7436:41000  | 97 trim24_vector   | 14392 | 60 41M34S | 9  | 34753385  | GTCTCAACTCTAATCTCAGGTGATCTACCCACTTGGCCCTCATGCTGCTGTTTTATTTAAAGTTTCGAA    |
| J00180:83:H22V2BBXY:8:2114:5061:6325   | 177 trim24_vector  | 14405 | 60 75M    | 9  | 48106860  | AATCTCAGTGATCTACCACCTTGGCCTCCAAATTCAGCGGATACAGGCGTGAACCACTGCTCCCTCCCTG   |
| J00180:83:H22V2BBXY:8:2216:25002:9684  | 97 trim24_vector   | 14467 | 60 75M    | 9  | 21402835  | GCTCCCTCCCTGCTCTGATTTTTAAATAACTATACAGTACGACGACGCTCCAGCATGACTAGGCTACCT    |
| J00180:83:H22V2BBXY:8:2209:30279:47700 | 113 trim24_vector  | 14468 | 60 31S44M | 9  | 49222118  | CCCATTCTCTTCTAACTCTCCCTACTCTCCCTCTCTGCTCTGATTTTAAATAACTATACCAGCAG        |
| J00180:83:H22V2BBXY:8:2209:30634:47436 | 1137 trim24_vector | 14468 | 60 31S44M | 9  | 49222118  | CCCATTCTCTTCTAACTCTCCCTACTCTCCCTCTCTGCTCTGATTTTAAATAACTATACCAGCAG        |
| J00180:83:H22V2BBXY:8:2213:16376:29237 | 1121 trim24_vector | 14607 | 48 27M48S | 9  | 8000039   | CACTCAGTAGCTGCTGTAATTCGATATCAAGCTTATTCATGCTAGGGTCTGGTATTGGTGCCTGGGGT     |
| J00180:83:H22V2BBXY:8:2213:16386:27637 | 97 trim24_vector   | 14607 | 48 27M48S | 9  | 8000039   | CACTCAGTAGCTGCTGTAATTCGATATCAAGCTTATTCATGCTAGGGTCTGGTATTGGTGCCTGGGGT     |
| J00180:83:H22V2BBXY:8:1221:2828:36394  | 161 trim24_vector  | 3149  | 0 75M     | 10 | 61613839  | GTCCCTGGAGGTGATGAAGAAGTGTGGGATGTGGCACTGAGGGACATGGCCAGTGGGCACGGTGGTGGTTGG |
| J00180:83:H22V2BBXY:8:2205:19918:35163 | 177 trim24_vector  | 12267 | 0 75M     | 10 | 117663921 | TGCTCTTATCTCAGCAGCTGAGATTTACCAAGCCAGAATGTACCTCGGCAGACAACAATAAGCCCAACCC   |
| J00180:83:H22V2BBXY:8:1127:10399:18212 | 1153 trim24_vector | 14020 | 60 75M    | 10 | 12767587  | TCTGACCCCTCCCAAGTGCCTCTCTGGCCTGGAAGTTGCCACTCCAGTGGCCACCAGCTTGTCTAATAAAA  |
| J00180:83:H22V2BBXY:8:1127:9546:15117  | 129 trim24_vector  | 14020 | 60 75M    | 10 | 12767587  | TGTGACCCCTCCCAAGTGCCTCTCTGGCCTGGAAGTTGCCACTCCAGTGGCCACCAGCTTGTCTAATAAAA  |
| J00180:83:H22V2BBXY:8:2215:17980:21219 | 129 trim24_vector  | 14066 | 60 43M32S | 10 | 3828486   | CAGTGCCCAACCGCTGCTCAATAAAATTAAGTTGCATCATGATTTGTTGATGATGTTTCTTATTTTATGG   |
| J00180:83:H22V2BBXY:8:1105:20192:31101 | 161 trim24_vector  | 14140 | 60 75M    | 10 | 79740271  | ATGGGGTGGAGGGGGTGGTATGGAGCAAGGGGCAAGTTGGGAAGACAACCTGTAGGGCTGCGGGTCTATTGG |
| J00180:83:H22V2BBXY:8:1119:6086:28674  | 177 trim24_vector  | 14141 | 60 13S62M | 10 | 104231877 | CCTGGGCTTTTTTGGGGTGGAGGGGGTGGTATGGAGCAAGGGGCAAGTTGGGAAGACAACCTGTAGGGCTGC |
| J00180:83:H22V2BBXY:8:1216:9567:34565  | 113 trim24_vector  | 14168 | 60 75M    | 10 | 126238233 | ATGGGCAAGTTGGGAAGACAACCTGTAGGGCTGCGGGTCTATTGGGAACCAAGCTGGAGTGCAGTGGCAAT  |
| J00180:83:H22V2BBXY:8:2221:29924:5974  | 177 trim24_vector  | 14262 | 60 75M    | 10 | 77367719  | TGCTCTGGGTTCAAGCGATTTCTCTGCTCAGCTCCGAGTTGTTGGGATTCCAGGCATGATGACCAAGCT    |
| J00180:83:H22V2BBXY:8:1104:29640:37800 | 65 trim24_vector   | 14308 | 60 75M    | 10 | 128694540 | TTGGGATTCCAGGCATGCATGACCAGGCTCAGCTAATTTTTGTTTTTGGTAGAGACGGGGTTCCACCATTTG |
| J00180:83:H22V2BBXY:8:2112:4208:23276  | 177 trim24_vector  | 14361 | 60 14S61M | 10 | 76101364  | GTGCCAATCTGTTGGAGACGGGTTCCACCATTTGGCCAGGCTGCTCCAACCTCTAATCTCAGGTGATCTAC  |
| J00180:83:H22V2BBXY:8:1203:29295:18001 | 161 trim24_vector  | 14604 | 60 30M45S | 10 | 127044882 | GTTCCACTCAGTAGTGCCTGTTGAATTCGATCAAGCTTATCGATAAGCTTATTCATGCTAGGGTCTGGT    |
| J00180:83:H22V2BBXY:8:2127:2301:33404  | 113 trim24_vector  | 14144 | 60 8S67M  | 11 | 45504724  | TCAGCTTGTGGAGGGGGTGGTATGGAGCAAGGGGCAAGTTGGGAAGACAACCTGTAGGGCTGCGGGTCTA   |
| J00180:83:H22V2BBXY:8:1111:1651:7486   | 161 trim24_vector  | 14196 | 60 75M    | 11 | 85009402  | GGCTCTGGGGTCTATTGGGAACCAAGCTGGAGTGCAGTGGCACAATCTGGCTCACTGCAATCTCCGCTCTG  |
| J00180:83:H22V2BBXY:8:1128:3356:47190  | 129 trim24_vector  | 14271 | 60 58M17S | 11 | 96189951  | GGTTCAAGCGATTCTCTGCTCAGCCTCCGAGTTGTTGGATTCCAGGCATGCATGCGCCGGCTGAACATTG   |
| J00180:83:H22V2BBXY:8:2209:12327:47155 | 145 trim24_vector  | 14348 | 60 75M    | 11 | 104683371 | TGTTTTTGGTAGAGACGGGTTCCACCATTTGGCCAGGCTGCTCCAACCTCTAATCTCAGGTGATCTACC    |
| J00180:83:H22V2BBXY:8:2209:12479:46680 | 1169 trim24_vector | 14348 | 60 75M    | 11 | 104683371 | TGTTTTTGGTAGAGACGGGTTCCACCATTTGGCCAGGCTGCTCCAACCTCTAATCTCAGGTGATCTACC    |
| J00180:83:H22V2BBXY:8:2209:15869:44359 | 1169 trim24_vector | 14348 | 60 75M    | 11 | 104683371 | TGTTTTTGGTAGAGACGGGTTCCACCATTTGGCCAGGCTGCTCCAACCTCTAATCTCAGGTGATCTACC    |
| J00180:83:H22V2BBXY:8:1204:29082:14502 | 97 trim24_vector   | 14375 | 60 75M    | 11 | 109134366 | CCATATTGGCCAGGCTGCTCCAACCTCTAATCTCAGGTGATCTACCCACTTGGCTCCAAATTTGCTGGGAT  |
| J00180:83:H22V2BBXY:8:1116:11718:6818  | 161 trim24_vector  | 14511 | 60 75M    | 11 | 39311631  | GGAGGACGTCACAGACAGCATAGGCTACCTGGCCATGCCCAACCGTGGGACATTTGAGTTGCTTGGCCAC   |
| J00180:83:H22V2BBXY:8:2219:21866:11425 | 129 trim24_vector  | 14515 | 60 75M    | 11 | 55921424  | GACGTCACAGACAGCATAGGCTACCTGGCCATGCCCAACCGTGGGACATTTGAGTTGCTTGGCCACTGTC   |
| J00180:83:H22V2BBXY:8:1227:24931:2211  | 113 trim24_vector  | 14542 | 60 75M    | 11 | 8538434   | GGCCATGCCCAACCGTGGGATTTGAGTTGCTTGGCACTGCTTCAACCTCTAATCTCAGGTGATCTACC     |
| J00180:83:H22V2BBXY:8:1107:1692:21061  | 97 trim24_vector   | 14561 | 60 73M2S  | 11 | 32089265  | GACATTTGAGTGTCTGCTTGTACTGTCTCTCATGCGTTGGTCCACTCAGTAGATGCTGTTGAATTCGATA   |
| J00180:83:H22V2BBXY:8:2128:13514:1525  | 97 trim24_vector   | 3214  | 0 41M34S  | 12 | 42596322  | GGTGGTTGGGGTGGTCTGGGGATCTGGAGGCTTTCTCAAAGACCAGCTCCTTATTGTTAGATTCTTT      |
| J00180:83:H22V2BBXY:8:1117:19989:12321 | 113 trim24_vector  | 14426 | 60 75M    | 12 | 22209179  | CTTGGCTCCAAATTTGCTGGGATACAGGCGTGAACCACTGCTCCCTCTCTGATTTTAAATAAAC         |
| J00180:83:H22V2BBXY:8:1210:6827:17298  | 81 trim24_vector   | 14951 | 0 75M     | 12 | 119597719 | CAGTGCCTGCCAGTCTACTGACCCAGCTGATCTCCAGGCAAGCTTCCACCCCTTCTGCTGATCC         |

|                                        |      |               |       |    |        |    |           |                                                                               |
|----------------------------------------|------|---------------|-------|----|--------|----|-----------|-------------------------------------------------------------------------------|
| J00180:83:H22V2BBXY:8:1222:27072:23012 | 113  | trim24_vector | 13168 | 0  | 75M    | 13 | 106148682 | GTTTGTCAAATGGTGGGAACTCTATGCTGTGAGAAATGCTCAAAGTATTCATCTTACTTGTCTATGTGCC        |
| J00180:83:H22V2BBXY:8:2214:2301:23839  | 145  | trim24_vector | 13425 | 0  | 28547M | 13 | 47799246  | TTCTTTTTCATTATGCTAACACTTCTTACTGCAATGAAATGAGCCTGGCTTCCAAGACCTGTTCTCTAACTG      |
| J00180:83:H22V2BBXY:8:2209:7588:45344  | 129  | trim24_vector | 14112 | 60 | 41M34S | 13 | 53883918  | GTCTGACTAGGTGTCTTCTATAATATTATGGGGTGGAGGGAGGAGTGGGGAAGGGAAGAGTGGGGAGGGGAGGA    |
| J00180:83:H22V2BBXY:8:1113:24353:20058 | 1121 | trim24_vector | 14198 | 60 | 75M    | 13 | 20481200  | CCTGCGGGGTCTATTGGGAACCAAGCTGGAGTGCAGTGGCACAATCTTGGCTCACTGCAATCTCCGCTCTGGG     |
| J00180:83:H22V2BBXY:8:1113:24464:19478 | 97   | trim24_vector | 14198 | 60 | 75M    | 13 | 20481200  | CCTGCGGGGTCTATTGGGAACCAAGCTGGAGTGCAGTGGCACAATCTTGGCTCACTGCAATCTCCGCTCTGGG     |
| J00180:83:H22V2BBXY:8:2224:1986:21922  | 81   | trim24_vector | 14278 | 60 | 22553M | 13 | 73148351  | ATGCTGAACATCTGCTCTGCGATTCTGCTCAGCTCCGAGTTGTGGTCACTGCAATCTCCGCTCTGGG           |
| J00180:83:H22V2BBXY:8:1207:25357:46803 | 113  | trim24_vector | 14336 | 60 | 27S48M | 13 | 28291057  | GCATCCACCTAGGAAATACCAATATAATCAGCTAATTTTTGTTTTTTTGGTAGAGACGGGGTTCCACCATTTGG    |
| J00180:83:H22V2BBXY:8:2204:1773:5728   | 145  | trim24_vector | 14391 | 60 | 75M    | 13 | 10925779  | GGTCTCCAACCTCTAATCTCAGGTGATCTACCACCTGGCCTCCCAAATGCTGGGATTACAGACGTGAACCAC      |
| J00180:83:H22V2BBXY:8:1215:22171:9596  | 129  | trim24_vector | 14099 | 60 | 52M23S | 14 | 30952065  | GTTCATCATTTTTGTCTGACTAGGTGTCTTCTATAATATTATGGGGTGGAGATGCCGTTTGACCTAGTGACAG     |
| J00180:83:H22V2BBXY:8:2220:7801:5376   | 145  | trim24_vector | 14210 | 60 | 75M    | 14 | 58237308  | ATTGGGAACCAAGCTGGAGTGCAGTGGCACAATCTTGGCTCACTGCAATCTCCGCTCTGGGTTCAAGCATTTC     |
| J00180:83:H22V2BBXY:8:1208:10561:35233 | 97   | trim24_vector | 14260 | 60 | 75M    | 14 | 54140366  | TCCGCTCTGGGTTCAAGCGATTCTCTGCTCAGCCTCCGAGTTGTTGGGATTCCAGGCATGCATGACCAGG        |
| J00180:83:H22V2BBXY:8:1111:20669:39559 | 177  | trim24_vector | 14344 | 51 | 22553M | 14 | 38085291  | GGTTTTTTTTTTTTTTTTTTTTTTTTTTTTTTTTTTTTGGTAGAGACGGGGTTCCACCATTTGGCCAGACTGGTCTC |
| J00180:83:H22V2BBXY:8:1215:15463:37818 | 129  | trim24_vector | 2792  | 60 | 58M17S | 15 | 17455155  | TCACTGATTTTGAACATAACGACCGCGTGAGTCAAAATGACGCATGATTATCTTTTAGGTTGCTAGTTTGATCC    |
| J00180:83:H22V2BBXY:8:2222:11089:41774 | 145  | trim24_vector | 4650  | 60 | 75M    | 15 | 103513304 | GGGGCTTTCGTGGCCGCGCGGCCCTCGTGGGACGGAAGCGTGGAGAGACCGCCAAGGGCTGTAGTCTGGGT       |
| J00180:83:H22V2BBXY:8:1114:19136:23399 | 129  | trim24_vector | 13808 | 60 | 75M    | 15 | 4321927   | AGGATCGAGCTGGCTTAAAGACTCAAAGACCATACGGTGTATTATAAAGATCATGATATCGAATACAAGGATTG    |
| J00180:83:H22V2BBXY:8:2110:22597:36464 | 177  | trim24_vector | 14111 | 60 | 75M    | 15 | 62733788  | TGCTGACTAGGTGTCTTCTATAATATTATGGGGTGGAGAGGGGTGGTATGGAGCAAGGGGCAAGTTGGGAAGA     |
| J00180:83:H22V2BBXY:8:2205:11069:13183 | 161  | trim24_vector | 14133 | 60 | 48M27S | 15 | 62277971  | TAATATTATGGGGTGGAGGGGGTGGTATGGAGCAAGGGGCAAGTTGGTACCAGACTGTAGGGTGTGTTTTTG      |
| J00180:83:H22V2BBXY:8:1119:7172:27356  | 177  | trim24_vector | 14141 | 60 | 13S62M | 15 | 7928590   | CCTGGGCTTTTTTTGGGGTGGAGGGGGTGGTATGGAGCAAGGGGCAAGTTGGGAAGACAACCTGTAGGGCCTGC    |
| J00180:83:H22V2BBXY:8:2118:19928:7785  | 81   | trim24_vector | 14148 | 60 | 75M    | 15 | 97593531  | GAGGGGGTGGTATGGAGCAAGGGGCAAGTTGGGAAGACAACCTGTAGGGCCTGCGGGTCTATTGGGAACCAAG     |
| J00180:83:H22V2BBXY:8:1117:9414:29694  | 161  | trim24_vector | 14192 | 60 | 75M    | 15 | 62138554  | GTAGGGCTCGGGGTCTATTGGGAACCAAGCTGGAGTGCAGTGGCACAATCTGGCTCACTGCAATCTCCGCTC      |
| J00180:83:H22V2BBXY:8:2222:9587:38539  | 65   | trim24_vector | 14241 | 60 | 61M14S | 15 | 61913605  | ATCTTGGCTCACTGCAATCTCCGCTCTGGTTCAGCGATTCTCTGCTCAGCCTCCCTACTGGCCTCCAGG         |
| J00180:83:H22V2BBXY:8:1226:27732:12867 | 65   | trim24_vector | 14276 | 60 | 75M    | 15 | 101120443 | AAGCGATTCTCTGCTCAGCCTCCGAGTTGTTGGGATTCCAGGCATGCATGACCAGGCTCAGCTAATTTTTGT      |
| J00180:83:H22V2BBXY:8:2108:28534:35075 | 81   | trim24_vector | 14344 | 60 | 17S58M | 15 | 52034725  | GCACCAATGACCACTTTTTTTTTTTTTTTTTGGTAGAGACGGGGTTCCACCATTTGGCCAGCTGGTCTCCAAT     |
| J00180:83:H22V2BBXY:8:1108:1925:9051   | 177  | trim24_vector | 14353 | 60 | 75M    | 15 | 20658294  | TTTTGGTAGAGCTGGTATGGAGCAAGGGGCAAGTTGGGAGCAACCTGTAGGGCCTGCTCAACTCTCAAGCTC      |
| J00180:83:H22V2BBXY:8:1211:21876:21465 | 113  | trim24_vector | 14613 | 12 | 21M54S | 15 | 58870365  | GTAGATGCTGTGAATTGATATCAAGCTTATCGATAAGCTTATATTCATGCTAGGGTCTGGTGTGGTGCG         |
| J00180:83:H22V2BBXY:8:1123:7192:10440  | 129  | trim24_vector | 12790 | 0  | 75M    | 16 | 77207186  | GGAGCTGATTCTACTCACAGGTCCAGTAGTCTGCTGGAGCCAATCGAATAAAACAGGAAACAGTGACCA         |
| J00180:83:H22V2BBXY:8:2116:11424:33387 | 177  | trim24_vector | 13978 | 60 | 23S52M | 16 | 52366080  | TGATTTAGAGGTACCGGTGTTGATCCCCGGGCTGCAGCCGGGGATCTGGGGTGGCATCCCTGTGACCCCT        |
| J00180:83:H22V2BBXY:8:1202:6329:45203  | 113  | trim24_vector | 14194 | 60 | 75M    | 16 | 91907465  | AGGGCTGCGGGGTCTATTGGGAACCAAGCTGGAGTGCAGTGGCACAATCTGGCTCACTGCAATCTCCGCTC       |
| J00180:83:H22V2BBXY:8:1211:7222:39787  | 97   | trim24_vector | 14214 | 60 | 75M    | 16 | 49309711  | GGAACCAAGCTGGAGTGCAGTGGCACAATCTGGCTCACTGCAATCTCCGCTCTGGGTTCAAGCGATTCTCT       |
| J00180:83:H22V2BBXY:8:1214:1499:33563  | 129  | trim24_vector | 14346 | 60 | 45M30S | 16 | 33207375  | TTGTTTTTTTTGGTAGAGACGGGGTTCCACCATTTGGCCAGGCTTGGTGGAGCATTCTATAACTTAAATGTTAG    |
| J00180:83:H22V2BBXY:8:1119:26423:39506 | 113  | trim24_vector | 14461 | 60 | 35S40M | 16 | 80539184  | TTTGGCACTTCTTTCTTAAAGCAGAGCTTCTACCACTGCTCCCTCCCTGTCTTCTGATTTTAAATAAC          |
| J00180:83:H22V2BBXY:8:1116:11799:7310  | 129  | trim24_vector | 14511 | 60 | 75M    | 16 | 5709215   | GGAGACCTCCAGACAGCATGCTACTGCGCCATGGCCCAACCTGGGACATTTGATTTGCTTGGTGAC            |
| J00180:83:H22V2BBXY:8:2211:1773:4743   | 129  | trim24_vector | 14596 | 60 | 38M37S | 16 | 22372547  | TGCGTTGGTTCAGCACAGTAGTCTGGTGAATTTGAATTCAGATACAAGCTTATAGTCCATGCTAGGGTCTGGT     |
| J00180:83:H22V2BBXY:8:1210:6664:17403  | 81   | trim24_vector | 3303  | 0  | 75M    | 17 | 68303734  | CAGCTGCTGCCAGTCTACTGACCCAGCTGATCTCCAGGCAAGCTTCCACCCCTTCTGCTTGCATCC            |
| J00180:83:H22V2BBXY:8:1209:19451:12058 | 129  | trim24_vector | 14087 | 60 | 67M8S  | 17 | 46016794  | TAATAAAATTAAGTTGCATCATTTTTGTCTGACTAGGTGCTTCTATAATATTATGGGGCGGAGGGGAGATGGCT    |
| J00180:83:H22V2BBXY:8:1216:21745:1332  | 81   | trim24_vector | 14128 | 60 | 13S62M | 17 | 16703367  | AACCAATCTTAAATCTATAATATTATGGGGTGGAGGGGGTGGTATGGAGCAAGGGGCAAGTTGGGAAGACAAC     |
| J00180:83:H22V2BBXY:8:1222:17584:10581 | 97   | trim24_vector | 14206 | 60 | 75M    | 17 | 70912287  | GTCTATTGGGAACCAAGCTGGAGTGCAGTGGCACAATCTTGGCTCACTGCAATCTCCGCTCTGGGTTCAAGCG     |
| J00180:83:H22V2BBXY:8:1222:17624:10862 | 1121 | trim24_vector | 14206 | 60 | 75M    | 17 | 70912287  | GTCTATTGGGAACCAAGCTGGAGTGCAGTGGCACAATCTTGGCGCACTGCAATCTCCGCTCTGGGTTCAAGCG     |
| J00180:83:H22V2BBXY:8:1225:6786:33510  | 161  | trim24_vector | 14234 | 60 | 72M3S  | 17 | 45513383  | TGGCACAATCTTGGCTCACTGCAATCTCCGCTCTGGGTTCAAGCGATTCTCTGCTCTCCGCTCCGAGTCT        |
| J00180:83:H22V2BBXY:8:2225:24424:20181 | 161  | trim24_vector | 14401 | 60 | 75M    | 17 | 32812476  | TCTAATCTCAGGTGATCTACCACTTGGCTCCCAAATGCTGGGATTACAGGGCTGAACCTGCTCCCTCT          |
| J00180:83:H22V2BBXY:8:1121:2290:9438   | 177  | trim24_vector | 14413 | 60 | 75M    | 17 | 11371872  | GTGATCTACCACTTGCTCCCAATGCTGGGATTACAGCGTGAACCACTGCTCCCTTCCCTGCTCTCTG           |
| J00180:83:H22V2BBXY:8:1217:10490:35954 | 113  | trim24_vector | 14442 | 60 | 75M    | 17 | 39771995  | GCTGGGATTACAGCGTGAACCACTGCTCCCTCCCTGCTTCTGATTTTAAATAACTATACCAGCAGGAGGA        |
| J00180:83:H22V2BBXY:8:2105:8085:19795  | 65   | trim24_vector | 13444 | 60 | 59M16S | 18 | 79278524  | GCTTCCAAAGACCTGTTCTCTAACTGTGCTGATTATTATAAAATAAATAAAACCCCTGAGGGATGAATCTT       |
| J00180:83:H22V2BBXY:8:2110:11373:10405 | 177  | trim24_vector | 13978 | 35 | 39S36M | 18 | 80463692  | TGGAAGCTAAAAAGCCGAATCTAGAGGTACCGGTTGTTGATCCCCGGGCTGCAGCCCGGGGAATCTGGGGTGG     |
| J00180:83:H22V2BBXY:8:1217:22171:4180  | 1169 | trim24_vector | 14124 | 60 | 75M    | 18 | 81530281  | GTCTTATAAATATTATGGGGTGGAGGGGGTGGTATGGAGCAAGGGGCAAGTTGGGAAGACAACCTGTAGGGC      |
| J00180:83:H22V2BBXY:8:2202:2493:39787  | 81   | trim24_vector | 14124 | 60 | 75M    | 18 | 81530281  | GTCTTATAAATATTATGGGGTGGAGGGGGTGGTATGGAGCAAGGGGCAAGTTGGGAAGACAACCTGTAGGGC      |
| J00180:83:H22V2BBXY:8:2202:3102:39611  | 1105 | trim24_vector | 14124 | 60 | 75M    | 18 | 81530281  | GTCTTATAAATATTATGGGGTGGAGGGGGTGGTATGGAGCAAGGGGCAAGTTGGGAAGACAACCTGTAGGGC      |
| J00180:83:H22V2BBXY:8:2220:18385:46153 | 97   | trim24_vector | 15033 | 0  | 75M    | 18 | 15504685  | ATCAAACATGCAGGCTCAGACAGGACAGCAGCAGTGTCTGTGGCCTTTTTGTGCTCTCCATCTGGCTGGTTTG     |
| J00180:83:H22V2BBXY:8:1221:20770:25984 | 145  | trim24_vector | 11628 | 60 | 75M    | 19 | 18467181  | GGAGATAAATAATTATGGGGTGGAGGGGGTGGTATGGAGCAAGGGGCAAGTTGGGAAGACAACCTGTAGGGC      |
| J00180:83:H22V2BBXY:8:2215:8684:2017   | 177  | trim24_vector | 12029 | 0  | 3S72M  | 19 | 37305743  | GGGCTTCCAACCAAGTTATCCAAGTTCCAACACAGATCAGCCTAGTCTAGTTACAACCTCCAGCATATTAGCAAC   |
| J00180:83:H22V2BBXY:8:1225:23155:8031  | 65   | trim24_vector | 14195 | 60 | 75M    | 19 | 44344006  | GGGCTGCGGGTCTATTGGGAACCAAGCTGGAGTGCAGTGGCACAATCTTGGCTCACTGCAATCTCCGCTCCT      |
| J00180:83:H22V2BBXY:8:1225:23165:8013  | 1089 | trim24_vector | 14195 | 60 | 75M    | 19 | 44344006  | GGGCTGCGGGTCTATTGGGAACCAAGCTGGAGTGCAGTGGCACAATCTTGGCTCACTGCAATCTCCGCTCCT      |
| J00180:83:H22V2BBXY:8:1102:13423:38328 | 97   | trim24_vector | 3319  | 0  | 75M    | MT | 16232     | TCCTACTGACCCAGCTGATCTCTCCAGGCAAGCTTCCACCCCTTCTGCTGCATCCAGACACCATCAAACAC       |

|                                        |                   |       |    |        |    |           |                                                                            |
|----------------------------------------|-------------------|-------|----|--------|----|-----------|----------------------------------------------------------------------------|
| J00180:83:H22V2BBXY:8:2215:25540:43638 | 177 trim24_vector | 14212 | 60 | 75M    | MT | 11424     | TGGGAACCAAGCTGGAGTGCAGTGGCACAATCTTGGCTACTGCAATCTCCGCTCCTGGGTTCAAGCGATTCTC  |
| J00180:83:H22V2BBXY:8:2114:18791:27268 | 113 trim24_vector | 57    | 60 | 75M    | X  | 47052592  | CATTCAAATATGTATCCGCTCATGAGACAATAACCCTGATAAATGCTTCAATAATTTGAAAAAGGAAGAGTATG |
| J00180:83:H22V2BBXY:8:2227:12905:40807 | 129 trim24_vector | 14136 | 60 | 75M    | X  | 93386038  | TATTATGGGGTGGAGGGGGTGGTATGGAGCAAGGGGCAAGTTGGGAAGACAACCTGTAGGGCCTGCGGGGTCTA |
| J00180:83:H22V2BBXY:8:2102:12997:11073 | 81 trim24_vector  | 14163 | 60 | 4S71M  | X  | 23931629  | ATATGAGCAAGGGGCAAGTTGGGAAGACAACCTGTAGGGCTGCGGGGTCTATTGGGAACCAAGCTGGAGTGCA  |
| J00180:83:H22V2BBXY:8:1117:11160:13341 | 177 trim24_vector | 14178 | 60 | 75M    | X  | 122334535 | TGGGAAGACAACCTGTAGGGCTGCGGGGTCTATTGGGAACCAAGCTGGAGTGCAGTGGCACAATCTTGGCTCAC |
| J00180:83:H22V2BBXY:8:2105:2067:1736   | 161 trim24_vector | 14187 | 60 | 75M    | X  | 141829210 | AACCTGTAGGGCTGCGGGGTCTATTGGGAACCAAGCTGGAGTGCAGTGGCACAATCTTGGCTCACTGCAATCTC |
| J00180:83:H22V2BBXY:8:1203:4574:27496  | 129 trim24_vector | 14226 | 60 | 75M    | X  | 107381999 | GAGTGCAGTGGCACAATCTTGGCTACTGCAATCTCCGCTCCTGGGTTCAAGCGATTCTCCTGCCTCAGCCTCC  |
| J00180:83:H22V2BBXY:8:1205:9283:2985   | 97 trim24_vector  | 14391 | 60 | 45M30S | X  | 67300498  | GGTCTCCAACCTCAATCTCAGGTGATCTACCCACCTTGGCCTCCACATAGATGTCCAATCTCCACAGCACCT   |
| J00180:83:H22V2BBXY:8:2102:31680:40877 | 97 trim24_vector  | 14604 | 60 | 30M45S | X  | 21738312  | GTCCACTCAGTAGATGCCTGTTGAATTCGATATCAAGCTTATCGATAAGCTTATATCCATGCTAGGGTGCTGGT |
