# Supplementary material for: Mammary-specific expression of Trim24 establishes a mouse model of human metaplastic breast cancer
Source: PubMed Central journal article supplement (PMC8433435; doi:10.1038/s41467-021-25650-z), 2021-09-10
Supplement: 41467_2021_25650_MOESM7_ESM.pdf [file 41467_2021_25650_MOESM7_ESM.pdf]

**Supplementary Table 4: List of TRIM24-driven mouse tumors and their pathological classification, necropsy details and samples selected for RNA-Seq.**

| Mouse Number | Age | Pathologist-1                 | Pathologist-2    | Mets  | Number of tumors | Tumor weight (g)    | RNA-Seq | Call based on RNA-Seq |
|--------------|-----|-------------------------------|------------------|-------|------------------|---------------------|---------|-----------------------|
| 64           | 13m | Carcinosarcoma                | Carcinosarcoma   | Lung  | 3                | 2.13, 0.48, 0.19    |         | Carcinosarcoma        |
| 89           | 13m | Carcinosarcoma                | Carcinoma        |       | 1                | 1.2                 |         | Carcinoma             |
| 567          | 11m | Spindle Cell Carcinoma        | Carcinosarcoma   |       | 1                | 1.09                |         | Carcinosarcoma        |
| 629          | 8m  | Carcinosarcoma                | Carcinosarcoma   | Liver | 2                | 9.22,0.24           |         |                       |
| 630          | 10m | Carcinosarcoma                | Carcinosarcoma   |       | 1                |                     |         |                       |
| 779          | 11m | Adenocarcinoma;Carcinosarcoma | Carcinosarcoma   |       | 2                |                     |         |                       |
| 801          | 10m | Carcinosarcoma                | Carcinosarcoma   |       | 4                | 1, 0.77, 0.53, 0.21 |         |                       |
| 897          | 19m | Carcinosarcoma                | Carcinosarcoma   |       | 2                | 2.09                |         | Carcinosarcoma        |
| 1781         | 21m | Adenoma                       | Adenoma          |       | 1                |                     |         |                       |
| 2642         | 9m  | Carcinosarcoma                | Carcinosarcoma   |       | 1                |                     |         |                       |
| 3956         | 19m | Carcinosarcoma                | Carcinoma(solid) |       | 1                |                     |         |                       |
| 273-5        | 9m  | Carcinoma                     | Carcinoma(solid) |       | 1                |                     |         | Carcinoma             |
