# Supplementary material for: Mammary-specific expression of Trim24 establishes a mouse model of human metaplastic breast cancer
Source: PubMed Central journal article supplement (PMC8433435; doi:10.1038/s41467-021-25650-z), 2021-09-10
Supplement: 41467_2021_25650_MOESM8_ESM.pdf [file 41467_2021_25650_MOESM8_ESM.pdf]

Supplementary Table 5: TRIM24 IHC scoring on human MpBC patient samples and associated tumor subtypes.

| Patient No | TRIM24 nuc | TRIM24 cyt | TRIM cat Nuc | TRIM cat CYT | p53    | date_diagnosis | date_OS  | days  | OS | MpBC Subtype                    |
|------------|------------|------------|--------------|--------------|--------|----------------|----------|-------|----|---------------------------------|
| 1          |            | 0 95 M     | low          | low          | pos    | 5/4/07         | 10/14/08 | 529   |    | 1 spindle cell/matrix producing |
| 2          |            | 0 100 M    | low          | low          | pos    | 9/3/87         | 11/5/89  | 794   |    | 0 spindle cell                  |
| 3          |            | 0 90 S     | low          | high         | pos NA |                | 12/10/19 | 11381 |    | 1 spindle cell                  |
| 4          | 15 W       | 5 M        | low          | low          | neg    | 1/0/00         | 10/10/02 | 37539 |    | 1 spindle cell/matrix producing |
| 5          | 10 W       | 20 W       | low          | low          | neg    | 11/22/02       | 10/26/03 | 338   |    | 1 matrix producing              |
| 6          | 30 M       | 60 M       | high         | high         | neg    | 3/14/01        | 2/25/02  | 348   |    | 1 squamous                      |
| 7          |            | 0 10 W     | low          | low          | neg    | 1/28/02        | 7/1/03   | 519   |    | 0 matrix producing              |
| 8          | 5 W        | 60 W       | low          | low          | pos    | 12/10/02       | 4/12/04  | 489   |    | 0 matrix producing              |
| 9          | 10 M       | 60 M       | low          | low          | neg    | 5/20/03        | 2/5/07   | 1357  |    | 0 matrix producing              |
| 10         | 30 M       | 5 W        | high         | high         | neg    | 8/8/03         | 10/1/19  | 5898  |    | 1 matrix producing              |
| 11         | 60 M       | 50 W       | high         | high         | neg    | 1/6/04         | 1/7/20   | 5845  |    | 0 matrix producing              |
| 12         | 70 M       | 90 W       | high         | high         | neg    | 6/2/03         | 3/15/07  | 1382  |    | 1 matrix producing              |
| 13         | 1 M        | 40 M       | low          | low          | pos    | 1/19/04        | 10/10/06 | 995   |    | 0 matrix producing              |
| 14         | 20 W       | 40 M       | low          | low          | pos    | 9/24/04        | 7/20/07  | 1029  |    | 0 spindle cell                  |
| 15         | 10 M       | 30 M       | low          | low          | neg    | 10/25/04       | 1/4/07   | 801   |    | 1 spindle cell/matrix producing |
| 16         | 10 S       | 60 S       | high         | high         | neg    | 8/10/01        | 9/2/11   | 3675  |    | 1 spindle cell                  |
| 17         | 5 W        | 80 S       | low          | high         | neg    | 3/24/05        | 4/6/18   | 4761  |    | 1 matrix producing              |
| 18         | 10 M       | 70 W       | low          | low          | pos    | 3/22/06        | 12/10/18 | 4646  |    | 0 spindle cell                  |
| 19         |            | 0 40 M     | low          | low          | pos    | 4/7/06         | 3/28/12  | 2182  |    | 0 matrix producing              |
| 20         |            | 0 80 W     | low          | low          | neg    | 8/25/06        | 1/4/19   | 4515  |    | 0 spindle cell                  |
| 21         | 50 M       | 5 W        | high         | high         | pos    | 2/23/07        | 10/3/08  | 588   |    | 0 matrix producing              |
| 22         | 20 W       | 50 W       | low          | low          | neg    | 3/13/07        | 1/29/20  | 4705  |    | 0 matrix producing              |
| 23         | 20 S       | 95W        | high         | high         | pos    | 3/30/05        | 6/12/17  | 4457  |    | 1 NA                            |
| 24         |            | 0 1W       | low          | low          | pos    | 2/5/09         | 1/3/20   | 3984  |    | 1 spindle cell                  |
| 25         | 3W         | 10 W       | low          | low          | neg    | 6/5/07         | 7/15/19  | 4423  |    | 0 matrix producing              |
| 26         |            | 0 50 M     | low          | low          | pos    | 3/17/08        | 3/5/20   | 4371  |    | 1 spindle cell/matrix producing |
| 27         | 5M         | 40 W       | low          | low          | pos    | 7/16/08        | 4/22/09  | 280   |    | 0 spindle cell/matrix producing |
| 28         | 1W         | 95M        | low          | low          | neg    | 6/25/08        | 2/10/20  | 4247  |    | 1 spindle cell                  |
| 29         | 10 W       | 25 M       | low          | low          | neg    | 11/16/08       | 5/6/19   | 3823  |    | 1 spindle cell                  |
| 30         | 20 W       | 70 M       | low          | low          | neg    | 5/5/09         | 9/1/16   | 2676  |    | 0 matrix producing              |
| 31         |            | 0 10 S     | low          | high         | pos    | 8/27/10        | 2/13/11  | 170   |    | 1 spindle cell                  |
| 32         | 20 M       | 10 W       | high         | high         | neg    | 1/25/10        | 3/17/16  | 2243  |    | 0 matrix producing              |
| 33         | 15 M       | 60 M       | high         | high         | pos    | 8/31/10        | 3/11/20  | 3480  |    | 1 matrix producing              |
| 34         | 10 W       | 10 W       | low          | low          | pos    | 10/20/10       | 2/13/20  | 3403  |    | 1 spindle cell                  |
| 35         |            | 0 50 M     | low          | low          | neg    | 10/8/10        | 1/10/20  | 3381  |    | 1 osteochondroid                |
| 36         | 60 S       | 20 M       | high         | high         | pos    | 12/15/10       | 10/23/11 | 312   |    | 1 spindle cell/matrix producing |
| 37         | 20 M       | 15 W       | high         | high         | pos    | 6/28/10        | 1/17/12  | 568   |    | 1 matrix producing              |
| 38         |            | 0 90 M     | low          | low          | pos    | 3/24/11        | 7/30/19  | 3050  |    | 0 NA                            |
| 39         | 70 S       | 30 W       | high         | high         | pos    | 4/12/11        | 3/12/14  | 1065  |    | 1 matrix producing              |
| 40         | 5 W        | 20 W       | low          | low          | neg    | 4/28/11        | 7/24/19  | 3009  |    | 0 spindle cell                  |
| 41         | 30 M       | 90 M       | high         | high         | pos    | 4/26/11        | 9/29/12  | 522   |    | 0 spindle cell                  |
| 42         | 40 S       |            | 0 high       | high         | pos    | 8/30/11        | 6/19/13  | 659   |    | 1 matrix producing              |
| 43         | 70 W       | 70 M       | high         | high         | pos    | 10/25/11       | 8/12/19  | 2848  |    | 0 matrix producing              |
| 44         | 20 M       | 50 M       | high         | high         | neg    | 11/7/11        | 3/6/20   | 3042  |    | 0 chondrosarcomatoid            |
| 45         | 15 M       | 60 M       | high         | high         | pos    | 2/6/12         | 4/4/18   | 2249  |    | 0 spindle cell                  |
| 46         | 3W         | 60 M       | low          | low          | neg    | 4/10/09        | 10/17/12 | 1286  |    | 1 spindle cell/matrix producing |
| 47         | 10 M       | 90 M       | low          | low          | neg    | 6/14/12        | 8/12/19  | 2615  |    | 1 spindle cell                  |
