# Supplementary material for: Mammary-specific expression of Trim24 establishes a mouse model of human metaplastic breast cancer
Source: PubMed Central journal article supplement (PMC8433435; doi:10.1038/s41467-021-25650-z), 2021-09-10
Supplement: 41467_2021_25650_MOESM9_ESM.pdf [file 41467_2021_25650_MOESM9_ESM.pdf]

Supplementary Table 6: List of differentially expressed genes of murine TRIM24-driven tumors and control mammary glands.

| Gene ID                | Gene Name     | p.value  | FDR      | Num Samples Normal | Num Samples TRIM24 | Mean Normal | Mean TRIM24  | Delta        | Log <sub>2</sub> Fold Change | Log <sub>2</sub> Fold Change (MLE) | Direction        | MMTV-Cre Mammary glands |           |       |       | TRIM24-driven mammary tumors |        |        |        |        |        |
|------------------------|---------------|----------|----------|--------------------|--------------------|-------------|--------------|--------------|------------------------------|------------------------------------|------------------|-------------------------|-----------|-------|-------|------------------------------|--------|--------|--------|--------|--------|
|                        |               |          |          |                    |                    |             |              |              |                              |                                    |                  | 133                     | 392_417_3 | 517_3 | 273_5 | 3956                         | 567    | 64     | 89     | 897    |        |
| ENSMUSG00000025804.5   | Ccr1          | 2.92E-53 | 8.90E-49 | 4                  | 6                  | 143.25      | 3454.833333  | 3311.583333  | 4.440113706                  | 4.506918366                        | Higher in TRIM24 | 137                     | 133       | 138   | 165   | 2374                         | 3179   | 3781   | 1935   | 2660   | 6800   |
| ENSMUSG00000027875.12  | Hmgcs2        | 1.05E-46 | 1.60E-42 | 4                  | 6                  | 3701        | 24.16666667  | 3676.833333  | 7.137844125                  | 7.406464                           | Higher in Normal | 1242                    | 2139      | 5064  | 6359  | 17                           | 6      | 27     | 5      | 30     | 60     |
| ENSMUSG00000025044.16  | Msr1          | 1.02E-34 | 1.03E-30 | 4                  | 6                  | 234.5       | 7429.833333  | 7195.333333  | 4.740280899                  | 4.870923304                        | Higher in TRIM24 | 213                     | 205       | 253   | 267   | 3453                         | 7175   | 6984   | 5365   | 3456   | 18146  |
| ENSMUSG000000030669.13 | Calca         | 1.66E-32 | 1.27E-28 | 4                  | 6                  | 6848        | 15           | 6833         | 7.952548375                  | 8.682478214                        | Higher in Normal | 2753                    | 2850      | 8267  | 13522 | 7                            | 1      | 11     | 38     | 15     | 18     |
| ENSMUSG00000029304.14  | Spp1          | 3.55E-31 | 2.16E-27 | 4                  | 6                  | 1984.5      | 118640.8333  | 116656.3333  | 5.577599525                  | 5.82594988                         | Higher in TRIM24 | 1300                    | 549       | 1134  | 2125  | 98837                        | 77637  | 67916  | 104924 | 146527 | 216004 |
| ENSMUSG00000029915.14  | Clec5a        | 1.42E-28 | 7.22E-25 | 4                  | 6                  | 74          | 1455.166667  | 1381.166667  | 4.147579805                  | 4.254781871                        | Higher in TRIM24 | 84                      | 79        | 62    | 71    | 766                          | 1451   | 2021   | 1015   | 1202   | 2276   |
| ENSMUSG00000024386.8   | Proc          | 2.52E-28 | 1.10E-24 | 4                  | 6                  | 153         | 9.5          | 143.5        | 4.001860471                  | 4.098672659                        | Higher in Normal | 97                      | 153       | 158   | 204   | 7                            | 8      | 9      | 5      | 13     | 15     |
| ENSMUSG00000017309.11  | Cd300lg       | 3.13E-28 | 1.19E-24 | 4                  | 6                  | 6303.25     | 400.166667   | 5903.833333  | 4.02670184                   | 4.124149453                        | Higher in Normal | 5788                    | 6042      | 5883  | 7500  | 168                          | 219    | 551    | 170    | 687    | 606    |
| ENSMUSG00000004136.10  | Abcc8         | 4.25E-27 | 1.29E-23 | 4                  | 6                  | 635.25      | 15           | 620.25       | 5.357006666                  | 5.605350996                        | Higher in Normal | 671                     | 359       | 800   | 711   | 4                            | 5      | 15     | 3      | 37     | 26     |
| ENSMUSG000000031410.14 | Nxf7          | 1.50E-26 | 3.92E-23 | 4                  | 6                  | 932.25      | 11.83333333  | 920.4166667  | 6.001647914                  | 6.369676288                        | Higher in Normal | 413                     | 412       | 1274  | 1630  | 5                            | 6      | 17     | 1      | 25     | 17     |
| ENSMUSG00000024679.10  | Ms4a6d        | 1.55E-26 | 3.92E-23 | 4                  | 6                  | 230.25      | 4494         | 4263.75      | 3.964873421                  | 4.065911469                        | Higher in TRIM24 | 187                     | 338       | 182   | 214   | 2760                         | 3416   | 4777   | 2555   | 2901   | 10555  |
| ENSMUSG00000019768.16  | Esr1          | 1.81E-24 | 4.24E-21 | 4                  | 6                  | 1885.25     | 287.166667   | 1598.833333  | 2.80159839                   | 2.839162107                        | Higher in Normal | 1795                    | 1620      | 2106  | 2020  | 149                          | 115    | 336    | 248    | 374    | 501    |
| ENSMUSG00000041324.14  | Inhba         | 7.58E-24 | 1.65E-20 | 4                  | 6                  | 252.25      | 8512.666667  | 8260.416667  | 4.92986552                   | 5.158499526                        | Higher in TRIM24 | 288                     | 166       | 210   | 345   | 1954                         | 9015   | 10649  | 8644   | 12528  | 8286   |
| ENSMUSG000000037613.16 | Tnfrsf23      | 1.52E-23 | 3.09E-20 | 4                  | 6                  | 138.5       | 5009.666667  | 4871.166667  | 5.041437199                  | 5.291340913                        | Higher in TRIM24 | 164                     | 109       | 127   | 154   | 1565                         | 8734   | 4492   | 3961   | 4894   | 6412   |
| ENSMUSG0000001547.3    | Nt5dc2        | 1.91E-23 | 3.64E-20 | 4                  | 6                  | 178         | 3895.333333  | 3717.333333  | 4.054370849                  | 4.179036994                        | Higher in TRIM24 | 130                     | 100       | 218   | 264   | 1250                         | 1091   | 3621   | 2664   | 3408   | 11338  |
| ENSMUSG000000025927.13 | Tfap2b        | 3.29E-23 | 5.89E-20 | 4                  | 6                  | 1983        | 45.16666667  | 1937.833333  | 5.503939734                  | 5.827984245                        | Higher in Normal | 692                     | 1789      | 2652  | 2799  | 14                           | 5      | 26     | 19     | 81     | 126    |
| ENSMUSG00000003213.16  | AA467197      | 4.49E-23 | 7.59E-20 | 4                  | 6                  | 26          | 908.166667   | 882.166667   | 4.789527414                  | 5.007982938                        | Higher in TRIM24 | 22                      | 44        | 20    | 18    | 682                          | 808    | 1059   | 787    | 350    | 1763   |
| ENSMUSG000000030792.8  | Dkl1          | 1.82E-22 | 2.92E-19 | 4                  | 6                  | 983         | 40.33333333  | 942.6666667  | 4.510128679                  | 4.689632491                        | Higher in Normal | 590                     | 659       | 1085  | 1598  | 35                           | 9      | 57     | 14     | 78     | 49     |
| ENSMUSG000000047562.3  | Mmp10         | 1.02E-21 | 1.55E-18 | 4                  | 6                  | 13.5        | 5922.666667  | 5909.166667  | 7.171348661                  | 8.154707331                        | Higher in TRIM24 | 11                      | 10        | 16    | 17    | 143                          | 2724   | 2307   | 643    | 3392   | 26327  |
| ENSMUSG00000042265.13  | Trem1         | 1.13E-21 | 1.64E-18 | 4                  | 6                  | 23.75       | 865.666667   | 841.9166667  | 4.966849541                  | 5.230536701                        | Higher in TRIM24 | 24                      | 11        | 27    | 33    | 311                          | 997    | 1544   | 265    | 945    | 1132   |
| ENSMUSG000000023913.17 | Pla2g7        | 1.19E-21 | 1.64E-18 | 4                  | 6                  | 1362.25     | 13438.833333 | 12076.583333 | 2.993838829                  | 3.046884569                        | Higher in TRIM24 | 838                     | 999       | 1473  | 2139  | 9346                         | 5691   | 10925  | 5622   | 11602  | 37447  |
| ENSMUSG000000066000.12 | Zfp979        | 1.87E-21 | 2.48E-18 | 4                  | 6                  | 710.75      | 89.33333333  | 621.4166667  | 3.130419765                  | 3.191389685                        | Higher in Normal | 1039                    | 592       | 606   | 606   | 48                           | 38     | 100    | 52     | 130    | 168    |
| ENSMUSG000000022156.7  | Gzme          | 3.26E-21 | 4.14E-18 | 4                  | 6                  | 4.25        | 965.83333333 | 961.58333333 | 6.890487172                  | 7.1780042331                       | Higher in TRIM24 | 10                      | 2         | 4     | 1     | 363                          | 763    | 1668   | 162    | 2375   | 464    |
| ENSMUSG00000001403.13  | Ube2c         | 6.66E-21 | 8.12E-18 | 4                  | 6                  | 446.25      | 3943.333333  | 3497.083333  | 3.006415208                  | 3.062314488                        | Higher in TRIM24 | 327                     | 261       | 477   | 720   | 2723                         | 1391   | 4198   | 3795   | 3641   | 7912   |
| ENSMUSG000000047631.3  | Apof          | 9.78E-21 | 1.15E-17 | 4                  | 6                  | 360.75      | 4            | 356.75       | 6.06671852                   | 6.591480758                        | Higher in Normal | 58                      | 130       | 527   | 728   | 3                            | 1      | 2      | 7      | 9      | 9      |
| ENSMUSG000000058914.12 | C1qtnf3       | 1.09E-20 | 1.23E-17 | 4                  | 6                  | 30.75       | 2529.833333  | 2499.833333  | 5.827004607                  | 6.308614431                        | Higher in TRIM24 | 50                      | 18        | 25    | 30    | 414                          | 777    | 6314   | 1671   | 3954   | 2049   |
| ENSMUSG000000037280.12 | Gaint6        | 2.48E-20 | 2.70E-17 | 4                  | 6                  | 92          | 616.33333333 | 524.33333333 | 2.571298827                  | 2.606989894                        | Higher in TRIM24 | 52                      | 91        | 111   | 114   | 356                          | 397    | 678    | 385    | 576    | 1306   |
| ENSMUSG000000111602.1  | Gm32014       | 2.14E-19 | 2.23E-16 | 4                  | 6                  | 82.5        | 5.66666667   | 76.83333333  | 3.868260841                  | 4.001822149                        | Higher in Normal | 85                      | 71        | 109   | 65    | 6                            | 3      | 2      | 3      | 10     | 10     |
| ENSMUSG000000011311.11 | Timp1         | 2.20E-19 | 2.23E-16 | 4                  | 6                  | 382.75      | 18645.166667 | 18262.41667  | 5.235960479                  | 5.596938273                        | Higher in TRIM24 | 146                     | 331       | 388   | 666   | 9187                         | 6484   | 15933  | 34687  | 5504   | 40076  |
| ENSMUSG000000095497.2  | Igkv1-122     | 4.14E-19 | 4.07E-16 | 4                  | 6                  | 260.25      | 1.5          | 258.75       | 6.821895327                  | 7.741674372                        | Higher in Normal | 48                      | 399       | 238   | 356   | 0                            | 1      | 3      | 0      | 0      | 5      |
| ENSMUSG000000024039.14 | Cbs           | 4.79E-19 | 4.56E-16 | 4                  | 6                  | 471.25      | 28.66666667  | 442.58333333 | 4.032106395                  | 4.184961771                        | Higher in Normal | 357                     | 309       | 520   | 699   | 37                           | 4      | 30     | 8      | 42     | 51     |
| ENSMUSG000000030849.18 | Fgfr2         | 1.28E-18 | 1.18E-15 | 4                  | 6                  | 4240.5      | 223.166667   | 4017.333333  | 4.053231055                  | 4.1212961504                       | Higher in Normal | 1566                    | 2370      | 6540  | 6486  | 171                          | 116    | 407    | 104    | 291    | 250    |
| ENSMUSG000000031209.14 | Heph          | 2.60E-18 | 2.33E-15 | 4                  | 6                  | 2306.25     | 136.666667   | 2169.583333  | 4.105865193                  | 4.275408671                        | Higher in Normal | 2465                    | 2357      | 2194  | 2211  | 40                           | 54     | 183    | 52     | 307    | 184    |
| ENSMUSG000000022211.8  | Carmil3       | 4.14E-18 | 3.60E-15 | 4                  | 6                  | 108.25      | 12.33333333  | 95.91666667  | 3.21478479                   | 3.295592675                        | Higher in Normal | 116                     | 121       | 113   | 83    | 12                           | 6      | 7      | 9      | 18     | 22     |
| ENSMUSG000000026193.15 | Fn1           | 5.04E-18 | 4.27E-15 | 4                  | 6                  | 4037.25     | 165664.5     | 161627.25    | 5.043252865                  | 5.392248262                        | Higher in TRIM24 | 2187                    | 2623      | 5379  | 5960  | 34887                        | 204775 | 175420 | 165761 | 39975  | 373169 |
| ENSMUSG000000020672.14 | Sntg2         | 7.02E-18 | 5.78E-15 | 4                  | 6                  | 216.5       | 13.66666667  | 202.83333333 | 3.981792694                  | 4.140209919                        | Higher in Normal | 140                     | 186       | 247   | 293   | 4                            | 3      | 18     | 7      | 29     | 21     |
| ENSMUSG000000056071.12 | S100a9        | 7.17E-18 | 6.03E-15 | 4                  | 6                  | 41.5        | 3028.333333  | 2986.833333  | 5.440349089                  | 5.901603969                        | Higher in TRIM24 | 45                      | 42        | 28    | 51    | 1697                         | 226    | 1219   | 1403   | 9368   | 4257   |
| ENSMUSG00000003477.5   | Inmt          | 7.73E-18 | 6.03E-15 | 4                  | 6                  | 857         | 22           | 835          | 5.468218142                  | 5.906327331                        | Higher in Normal | 1325                    | 1179      | 359   | 565   | 4                            | 2      | 16     | 8      | 20     | 82     |
| ENSMUSG000000049115.15 | Agtr1a        | 1.24E-17 | 9.02E-15 | 4                  | 6                  | 1808.75     | 98           | 1710.75      | 4.120888697                  | 4.300365178                        | Higher in Normal | 1656                    | 2086      | 1665  | 1828  | 41                           | 30     | 123    | 89     | 224    | 81     |
| ENSMUSG000000063430.9  | Wscd2         | 1.24E-17 | 9.02E-15 | 4                  | 6                  | 382.25      | 25           | 357.25       | 4.010141136                  | 4.175037875                        | Higher in Normal | 562                     | 372       | 286   | 309   | 10                           | 8      | 10     | 25     | 46     | 51     |
| ENSMUSG000000097383.1  | 1500026H17Rik | 1.56E-17 | 1.11E-14 | 4                  | 6                  | 74.25       | 6.833333333  | 67.41666667  | 3.424608927                  | 3.527950919                        | Higher in Normal | 71                      | 72        | 71    | 83    | 7                            | 2      | 5      | 8      | 10     | 9      |
| ENSMUSG000000029282.3  | Amtn          | 1.77E-17 | 1.23E-14 | 4                  | 6                  | 462.25      | 2.16666667   | 460.83333333 | 6.864705261                  | 7.91411774                         | Higher in Normal | 29                      | 272       | 634   | 914   | 4                            | 1      | 0      | 0      | 1      | 7      |
| ENSMUSG000000017724.14 | Etv4          | 2.01E-17 | 1.36E-14 | 4                  | 6                  | 484         | 3672.833333  | 3189.833333  | 2.95191398                   | 3.016912567                        | Higher in TRIM24 | 289                     | 233       | 639   | 775   | 2784                         | 3314   | 3767   | 3110   | 4150   | 4912   |
| ENSMUSG000000052316.9  | Lrrc15        | 2.56E-17 | 1.66E-14 | 4                  | 6                  | 142.75      | 7229.166667  | 7086.416667  | 5.269207678                  | 5.697128865                        | Higher in TRIM24 | 114                     | 56        | 173   | 228   | 831                          | 6247   | 17824  | 2659   | 5769   | 10045  |
| ENSMUSG000000058297.16 | Spock2        | 2.92E-17 | 1.84E-14 | 4                  | 6                  | 2211        | 70.5         | 2140.5       | 4.677886409                  | 4.95391688                         | Higher in Normal | 705                     | 903       | 3551  | 3685  | 20                           | 23     | 114    | 59     | 122    | 85     |
| ENSMUSG000000029335.5  | Bmp3          | 2.96E-17 | 1.84E-14 | 4                  | 6                  | 2197.75     | 61           | 2136.75      | 4.836667083                  | 5.144529312                        | Higher in Normal | 1674                    | 3437      | 1801  | 1879  | 21                           | 96     | 46     | 39     | 123    | 41     |
| ENSMUSG000000048776.13 | Phlh          | 3.07E-17 | 1.87E-14 | 4                  | 6                  | 104.25      | 1601.833333  | 1497.833333  | 3.797550747                  | 3.942826567                        | Higher in TRIM24 | 44                      | 49        | 152   | 172   | 1224                         | 1430   | 809    | 722    | 2909   | 2517   |
| ENSMUSG000000042684.8  | Npl           | 3.14E-17 | 1.87E-14 | 4                  | 6                  | 182.5       | 3059.833333  | 2877.333333  | 3.770649242                  | 3.912951293                        | Higher in TRIM24 | 349                     | 133       | 109   | 139   | 3026                         | 1666   | 3063   | 2498   | 1400   | 6706   |
| ENSMUSG000000028996.9  | Rbp7          | 4.33E-17 | 2.54E-14 | 4                  | 6                  | 1408        | 115.83333333 | 1292.166667  | 3.608943258                  | 3.73183271                         | Higher in Normal | 1837                    | 1445      | 848   | 1502  | 84                           | 32     | 80     | 156    | 145    | 198    |
| ENSMUSG00000002349.14  | Clec4n        | 5.04E-17 | 2.90E-14 | 4                  | 6                  | 278         | 7083.333333  | 6805.333333  | 4.404930548                  | 4.643665878                        | Higher in TRIM24 | 230                     | 168       | 311   | 403   | 1787                         | 5654   | 15402  | 3696   | 3208   | 12753  |
| ENSMUSG000000027931.12 | Npr1          | 8.14E-17 | 4.59E-14 | 4                  | 6                  | 2458.25     | 448          | 2010.25      | 2.563043619                  | 2.606522446                        | Higher in Normal | 1886                    | 2088      | 2977  | 2882  | 328                          | 158    | 558    | 203    | 692    | 749    |
| ENSMUSG000000050315.13 | Sympo2        | 8.90E-17 |          |                    |                    |             |              |              |                              |                                    |                  |                         |           |       |       |                              |        |        |        |        |        |

|                       |               |          |          |   |   |          |             |             |             |                  |                  |       |      |        |       |       |       |        |        |       |        |
|-----------------------|---------------|----------|----------|---|---|----------|-------------|-------------|-------------|------------------|------------------|-------|------|--------|-------|-------|-------|--------|--------|-------|--------|
| ENSMUSG00000028132.15 | Tmem56        | 5.45E-15 | 1.89E-12 | 4 | 6 | 6054.25  | 159         | 5895.25     | 4.788295353 | 5.142685416      | Higher in Normal | 2374  | 4027 | 9902   | 7914  | 105   | 32    | 397    | 152    | 198   | 70     |
| ENSMUSG00000044811.13 | Cd300c2       | 8.67E-15 | 2.93E-12 | 4 | 6 | 229      | 1674.166667 | 1445.166667 | 2.70510641  | 2.7651202        | Higher in TRIM24 | 154   | 258  | 214    | 290   | 953   | 1314  | 2161   | 1173   | 1054  | 3390   |
| ENSMUSG00000048329.17 | Mfsd6l        | 9.39E-15 | 3.14E-12 | 4 | 6 | 161.25   | 21          | 140.25      | 2.989234175 | 3.07019606       | Higher in Normal | 115   | 93   | 183    | 254   | 15    | 10    | 22     | 5      | 34    | 40     |
| ENSMUSG00000079227.10 | Ccr5          | 9.71E-15 | 3.21E-12 | 4 | 6 | 408.5    | 4105.166667 | 3696.666667 | 3.104756863 | 3.197392838      | Higher in TRIM24 | 375   | 548  | 375    | 336   | 2243  | 3844  | 5480   | 2466   | 2432  | 8166   |
| ENSMUSG00000044303.6  | Cdkn2a        | 1.01E-14 | 3.29E-12 | 4 | 6 | 143.5    | 18831       | 18687.5     | 5.739321027 | 6.478346601      | Higher in TRIM24 | 83    | 320  | 71     | 100   | 3687  | 1385  | 22212  | 16559  | 3397  | 65746  |
| ENSMUSG00000038765.13 | Lmx1b         | 1.06E-14 | 3.43E-12 | 4 | 6 | 1508.25  | 50.66666667 | 1457.583333 | 4.601299076 | 4.920238272      | Higher in Normal | 422   | 569  | 2490   | 2552  | 38    | 13    | 40     | 21     | 145   | 47     |
| ENSMUSG00000028364.15 | Tnc           | 1.09E-14 | 3.50E-12 | 4 | 6 | 1388.5   | 60393.5     | 59005       | 5.1970191   | 5.708320423      | Higher in TRIM24 | 665   | 349  | 2216   | 2324  | 9496  | 46138 | 119603 | 104670 | 33322 | 49132  |
| ENSMUSG00000082908.4  | Gm13736       | 1.21E-14 | 3.84E-12 | 4 | 6 | 12.75    | 1311.5      | 1298.75     | 5.772752215 | 6.542242109      | Higher in TRIM24 | 12    | 15   | 9      | 15    | 1590  | 10    | 903    | 1841   | 972   | 2553   |
| ENSMUSG00000049036.7  | Tmem121       | 1.27E-14 | 3.95E-12 | 4 | 6 | 15.25    | 483.3333333 | 468.0833333 | 4.555318861 | 4.882350802      | Higher in TRIM24 | 13    | 15   | 15     | 18    | 209   | 134   | 488    | 825    | 118   | 1126   |
| ENSMUSG00000074093.4  | Svip          | 1.27E-14 | 3.95E-12 | 4 | 6 | 732.25   | 124.5       | 607.75      | 2.775469235 | 2.840635052      | Higher in Normal | 897   | 872  | 565    | 595   | 66    | 42    | 127    | 68     | 181   | 263    |
| ENSMUSG00000030731.13 | Syt13         | 1.38E-14 | 4.21E-12 | 4 | 6 | 168.5    | 32.83333333 | 135.6666667 | 2.545372934 | 2.595377018      | Higher in Normal | 211   | 171  | 132    | 160   | 20    | 12    | 32     | 18     | 45    | 70     |
| ENSMUSG00000042845.7  | Wfd1c2        | 1.42E-14 | 4.29E-12 | 4 | 6 | 542.25   | 2           | 540.25      | 6.644191286 | 7.887537117      | Higher in Normal | 22    | 25   | 852    | 1270  | 1     | 1     | 3      | 2      | 4     | 1      |
| ENSMUSG00000004609.11 | Cd33          | 1.47E-14 | 4.40E-12 | 4 | 6 | 336.5    | 2114.333333 | 1777.833333 | 2.558425733 | 2.609827244      | Higher in TRIM24 | 397   | 231  | 374    | 344   | 931   | 2149  | 2091   | 1592   | 1958  | 3965   |
| ENSMUSG00000033777.3  | Tlr13         | 1.53E-14 | 4.54E-12 | 4 | 6 | 101.75   | 1598        | 1496.25     | 3.501096854 | 3.639175861      | Higher in TRIM24 | 102   | 181  | 64     | 60    | 1085  | 1196  | 1205   | 675    | 1215  | 4212   |
| ENSMUSG00000032294.17 | Pkm           | 1.75E-14 | 5.11E-12 | 4 | 6 | 14980.25 | 114329.3333 | 99349.08333 | 2.648555975 | 2.706103396      | Higher in TRIM24 | 13186 | 9397 | 16505  | 20833 | 76210 | 37673 | 99353  | 87349  | 62707 | 322684 |
| ENSMUSG00000068196.4  | Col8a1        | 1.80E-14 | 5.22E-12 | 4 | 6 | 999.75   | 11785.83333 | 10786.08333 | 3.558829779 | 3.704811867      | Higher in TRIM24 | 718   | 993  | 1153   | 1135  | 7544  | 9854  | 17478  | 17125  | 10811 | 7903   |
| ENSMUSG00000024998.17 | Ptce1         | 2.28E-14 | 6.48E-12 | 4 | 6 | 2392     | 239.8333333 | 2152.166667 | 3.226966093 | 3.333183281      | Higher in Normal | 1367  | 1114 | 4027   | 3060  | 193   | 92    | 220    | 149    | 513   | 272    |
| ENSMUSG00000024827.9  | Gldc          | 2.30E-14 | 6.49E-12 | 4 | 6 | 420.25   | 45.16666667 | 375.0833333 | 3.327027976 | 3.443637661      | Higher in Normal | 414   | 236  | 530    | 501   | 13    | 10    | 67     | 25     | 47    | 109    |
| ENSMUSG00000022840.8  | Adcy5         | 2.38E-14 | 6.65E-12 | 4 | 6 | 2613.5   | 208.5       | 2405        | 3.618821502 | 3.771212192      | Higher in Normal | 2224  | 3647 | 2387   | 2196  | 140   | 113   | 284    | 80     | 465   | 169    |
| ENSMUSG00000019916.14 | P4ha1         | 2.48E-14 | 6.87E-12 | 4 | 6 | 1530.75  | 11793.33333 | 10262.58333 | 2.644868471 | 2.702880703      | Higher in TRIM24 | 1101  | 1156 | 1784   | 2082  | 5785  | 4981  | 9140   | 9393   | 6819  | 34642  |
| ENSMUSG00000005815.3  | Sez6l         | 2.56E-14 | 7.02E-12 | 4 | 6 | 305      | 13          | 292         | 4.600132422 | Higher in Normal | 137              | 70    | 508  | 505    | 12    | 2     | 12    | 6      | 26     | 20    |        |
| ENSMUSG00000066687.5  | Zbtb16        | 2.84E-14 | 7.64E-12 | 4 | 6 | 1316     | 40.5        | 1275.5      | 4.876381612 | 5.276881969      | Higher in Normal | 881   | 849  | 2259   | 1275  | 4     | 13    | 33     | 6      | 117   | 70     |
| ENSMUSG00000042961.13 | Egflam        | 3.12E-14 | 8.32E-12 | 4 | 6 | 1128.25  | 186.3333333 | 941.9166667 | 2.585953914 | 2.64011479       | Higher in Normal | 1053  | 862  | 1197   | 1401  | 155   | 76    | 320    | 145    | 145   | 277    |
| ENSMUSG00000036813.11 | Entpd8        | 3.37E-14 | 8.93E-12 | 4 | 6 | 416      | 3.833333333 | 412.1666667 | 6.00159607  | 6.844302365      | Higher in Normal | 79    | 58   | 760    | 767   | 1     | 0     | 3      | 1      | 13    | 5      |
| ENSMUSG00000056758.14 | Hmga2         | 3.53E-14 | 9.27E-12 | 4 | 6 | 40       | 9396        | 9356        | 6.479305777 | 7.803875689      | Higher in TRIM24 | 99    | 37   | 8      | 16    | 2712  | 19321 | 5586   | 5256   | 160   | 23341  |
| ENSMUSG000000076564.2 | Igkv12-46     | 3.59E-14 | 9.35E-12 | 4 | 6 | 133.5    | 12          | 121.5       | 3.664151251 | 3.823602909      | Higher in Normal | 205   | 95   | 98     | 136   | 6     | 2     | 12     | 3      | 14    | 35     |
| ENSMUSG00000045318.6  | Adra2c        | 3.80E-14 | 9.80E-12 | 4 | 6 | 224.5    | 3           | 221.5       | 5.519725511 | 6.161340521      | Higher in Normal | 56    | 104  | 319    | 419   | 0     | 2     | 5      | 1      | 9     | 1      |
| ENSMUSG00000027221.5  | Chst1         | 3.96E-14 | 1.01E-11 | 4 | 6 | 4831.5   | 838         | 3993.5      | 2.613526626 | 2.669938392      | Higher in Normal | 5761  | 4609 | 4921   | 4935  | 443   | 439   | 12848  | 668    | 566   | 1664   |
| ENSMUSG00000051652.4  | Lrrc3         | 4.34E-14 | 1.10E-11 | 4 | 6 | 429.5    | 38          | 391.5       | 3.331868749 | 3.452571463      | Higher in Normal | 339   | 404  | 456    | 519   | 61    | 26    | 43     | 17     | 56    | 25     |
| ENSMUSG00000062937.7  | Mtap          | 4.49E-14 | 1.12E-11 | 4 | 6 | 1078.25  | 6940.333333 | 5862.083333 | 2.552795758 | 2.605899613      | Higher in TRIM24 | 1229  | 938  | 961    | 1185  | 2632  | 5899  | 6659   | 6513   | 6525  | 13414  |
| ENSMUSG00000016942.5  | Tmprss6       | 4.51E-14 | 1.12E-11 | 4 | 6 | 3502     | 46.5        | 3455.5      | 5.52785791  | 6.15403554       | Higher in Normal | 158   | 333  | 6134   | 7383  | 34    | 18    | 34     | 44     | 81    | 68     |
| ENSMUSG00000039349.5  | C130074G19Rik | 4.58E-14 | 1.13E-11 | 4 | 6 | 11148.5  | 1274.833333 | 9873.666667 | 3.057866512 | 3.150005731      | Higher in Normal | 11890 | 9301 | 101003 | 13300 | 577   | 927   | 1737   | 751    | 2398  | 1159   |
| ENSMUSG00000034450.7  | Gulo          | 5.63E-14 | 1.38E-11 | 4 | 6 | 75       | 2.666666667 | 72.33333333 | 4.621423865 | 4.977339757      | Higher in Normal | 108   | 31   | 97     | 64    | 0     | 3     | 4      | 0      | 2     | 7      |
| ENSMUSG00000027199.14 | gatm          | 6.13E-14 | 1.49E-11 | 4 | 6 | 614      | 8018        | 7404        | 3.629530346 | 3.792426522      | Higher in TRIM24 | 585   | 699  | 577    | 595   | 7006  | 8064  | 5072   | 13141  | 3720  | 11105  |
| ENSMUSG00000053411.16 | Cbx7          | 6.94E-14 | 1.67E-11 | 4 | 6 | 3563.5   | 544.8333333 | 3018.666667 | 2.815571084 | 2.887993025      | Higher in Normal | 2227  | 3358 | 4461   | 4208  | 699   | 254   | 326    | 164    | 697   | 1129   |
| ENSMUSG00000029163.9  | Emilin1       | 6.98E-14 | 1.67E-11 | 4 | 6 | 415.25   | 5205        | 4789.75     | 3.551961619 | 3.704658739      | Higher in TRIM24 | 312   | 333  | 498    | 518   | 3630  | 2145  | 5272   | 9539   | 2540  | 8104   |
| ENSMUSG00000028713.17 | Cyp4b1        | 8.01E-14 | 1.91E-11 | 4 | 6 | 2395.5   | 139.5       | 2256        | 4.040379034 | 4.266649341      | Higher in Normal | 1929  | 2783 | 2114   | 2756  | 64    | 34    | 249    | 42     | 317   | 131    |
| ENSMUSG00000041828.15 | Abca8a        | 9.33E-14 | 2.18E-11 | 4 | 6 | 1743.25  | 258.1666667 | 1485.083333 | 2.767747609 | 2.837232485      | Higher in Normal | 2058  | 1584 | 1735   | 1596  | 90    | 205   | 306    | 169    | 424   | 355    |
| ENSMUSG00000045534.4  | Kcna5         | 1.06E-13 | 2.46E-11 | 4 | 6 | 292.75   | 35.33333333 | 257.4166667 | 3.132471154 | 3.234924643      | Higher in Normal | 438   | 238  | 233    | 262   | 12    | 14    | 44     | 21     | 64    | 57     |
| ENSMUSG00000030711.15 | Sult1a1       | 1.15E-13 | 2.65E-11 | 4 | 6 | 3812.75  | 182.5       | 3630.25     | 4.303477672 | 4.584894733      | Higher in Normal | 6209  | 6125 | 1191   | 1726  | 67    | 122   | 213    | 122    | 361   | 210    |
| ENSMUSG00000051048.17 | P4ha3         | 1.52E-13 | 3.47E-11 | 4 | 6 | 42.5     | 926.8333333 | 884.3333333 | 4.138014097 | 4.398453777      | Higher in TRIM24 | 88    | 31   | 24     | 27    | 257   | 726   | 1428   | 666    | 1667  | 817    |
| ENSMUSG00000034810.7  | Scn7a         | 1.75E-13 | 3.95E-11 | 4 | 6 | 5652.25  | 425         | 5227.25     | 3.714016952 | 3.892392283      | Higher in Normal | 5683  | 6364 | 5810   | 4752  | 161   | 156   | 487    | 207    | 1169  | 370    |
| ENSMUSG00000076549.2  | Igkv4-68      | 1.96E-13 | 4.38E-11 | 4 | 6 | 75.75    | 7.333333333 | 68.41666667 | 3.277709415 | 3.400485506      | Higher in Normal | 58    | 50   | 86     | 109   | 11    | 6     | 6      | 1      | 10    | 10     |
| ENSMUSG00000074677.11 | Sirpb1c       | 2.04E-13 | 4.54E-11 | 4 | 6 | 30.25    | 582.6666667 | 552.4166667 | 4.196348832 | Higher in TRIM24 | 45               | 29    | 21   | 26     | 86    | 689   | 655   | 438    | 608    | 1020  |        |
| ENSMUSG00000022696.17 | Sid1t         | 2.38E-13 | 5.26E-11 | 4 | 6 | 2448     | 72.16666667 | 2375.833333 | 4.825754204 | 5.248197099      | Higher in Normal | 1141  | 728  | 3981   | 3942  | 62    | 7     | 12     | 14     | 206   | 112    |
| ENSMUSG00000041794.13 | Myrip         | 2.58E-13 | 5.65E-11 | 4 | 6 | 280.25   | 19.16666667 | 261.0833333 | 3.831917263 | 4.032237268      | Higher in Normal | 174   | 268  | 369    | 310   | 28    | 6     | 31     | 2      | 38    | 30     |
| ENSMUSG00000029371.7  | Cxcl5         | 2.90E-13 | 6.27E-11 | 4 | 6 | 32.25    | 4509.166667 | 4476.916667 | 5.825476916 | 6.757345351      | Higher in TRIM24 | 19    | 22   | 21     | 67    | 3309  | 43    | 1289   | 528    | 11536 | 10350  |
| ENSMUSG00000056602.11 | Fry           | 2.90E-13 | 6.27E-11 | 4 | 6 | 3037.75  | 468.3333333 | 2569.416667 | 2.79388629  | 2.868528735      | Higher in Normal | 3792  | 3603 | 2741   | 2015  | 578   | 174   | 467    | 227    | 665   | 699    |
| ENSMUSG00000017716.15 | Birc5         | 3.04E-13 | 6.52E-11 | 4 | 6 | 369.5    | 3311.5      | 2942        | 2.970005317 | 3.061536497      | Higher in TRIM24 | 399   | 188  | 371    | 520   | 2662  | 860   | 3048   | 3833   | 2072  | 7394   |
| ENSMUSG00000032332.17 | Col12a1       | 3.09E-13 | 6.57E-11 | 4 | 6 | 877.5    | 24232.66667 | 23355.16667 | 4.452584149 | 4.795528888      | Higher in TRIM24 | 567   | 184  | 1548   | 1211  | 3821  | 16427 | 52259  | 8842   | 26546 | 37501  |
| ENSMUSG00000046245.13 | Pilra         | 3.21E-13 | 6.79E-11 | 4 | 6 | 131      | 1531.833333 | 1400.833333 | 3.428859275 | 3.573808723      | Higher in TRIM24 | 107   | 135  | 107    | 175   | 661   | 1762  | 2678   | 1045   | 832   | 2213   |
| ENSMUSG00000021255.17 | Esrrb         | 3.41E-13 | 7.16E-11 | 4 | 6 | 1295.5   | 22.5        | 1273        | 5.300879626 | 5.893857699      | Higher in Normal | 158   | 90   | 2429   | 2505  | 33    | 5     | 13     | 8      | 27    | 49     |
| ENSMUSG00000095407.1  | Tmem200c      | 3.60E-13 | 7.50E-11 | 4 | 6 | 117      | 0.833333333 | 116.1666667 | 5.956334721 | 6.994413974      | Higher in Normal | 16    | 36   | 192    | 224   | 1     | 1     | 1      | 0      | 2     | 0      |
| ENSMUSG00000037852.8  | Cpe           | 3.72E-13 | 7.71E-11 | 4 | 6 | 2063.75  | 24350.16667 | 22286.41667 |             |                  |                  |       |      |        |       |       |       |        |        |       |        |

|                       |                |          |          |   |   |          |             |             |             |             |                  |       |       |       |       |      |       |       |       |       |       |
|-----------------------|----------------|----------|----------|---|---|----------|-------------|-------------|-------------|-------------|------------------|-------|-------|-------|-------|------|-------|-------|-------|-------|-------|
| ENSMUSG00000021763.16 | BC067074       | 2.48E-12 | 4.20E-10 | 4 | 6 | 297.75   | 36.33333333 | 261.4166667 | 3.01265394  | 3.115670336 | Higher in Normal | 237   | 231   | 462   | 261   | 14   | 15    | 48    | 23    | 76    | 42    |
| ENSMUSG00000033174.17 | Mgll           | 2.87E-12 | 4.83E-10 | 4 | 6 | 31817.75 | 2695.5      | 29122.25    | 3.617754725 | 3.802164606 | Higher in Normal | 46769 | 51955 | 11921 | 16626 | 1990 | 1036  | 2831  | 1743  | 5010  | 3563  |
| ENSMUSG00000074813.12 | Gml14005       | 3.07E-12 | 5.14E-10 | 4 | 6 | 124      | 1164.333333 | 1040.333333 | 2.994629534 | 3.098184218 | Higher in TRIM24 | 136   | 145   | 89    | 126   | 426  | 594   | 1317  | 1478  | 832   | 2339  |
| ENSMUSG0000004891.16  | Nes            | 3.16E-12 | 5.26E-10 | 4 | 6 | 985.25   | 12688       | 11702.75    | 3.425838041 | 3.580557498 | Higher in TRIM24 | 704   | 857   | 1117  | 1263  | 4724 | 6262  | 19141 | 13768 | 3616  | 28617 |
| ENSMUSG00000058833.2  | Gml13003       | 3.22E-12 | 5.33E-10 | 4 | 6 | 47.25    | 2.5         | 44.75       | 4.41634848  | 4.406566719 | Higher in Normal | 46    | 37    | 72    | 34    | 4    | 2     | 0     | 1     | 1     | 7     |
| ENSMUSG00000022098.9  | Bmp1           | 3.76E-12 | 6.19E-10 | 4 | 6 | 1882.75  | 17057.33333 | 15174.58333 | 3.054082063 | 3.165128495 | Higher in TRIM24 | 1139  | 1721  | 2246  | 2425  | 4561 | 17846 | 19237 | 15787 | 12582 | 32331 |
| ENSMUSG00000024215.13 | Spdef          | 4.10E-12 | 6.72E-10 | 4 | 6 | 206.25   | 19.33333333 | 186.9166667 | 3.42814318  | 3.585624188 | Higher in Normal | 162   | 133   | 221   | 309   | 11   | 3     | 14    | 8     | 51    | 29    |
| ENSMUSG00000015947.10 | Fcgr1          | 4.35E-12 | 7.05E-10 | 4 | 6 | 150      | 2583.5      | 2433.5      | 3.763190994 | 3.983150301 | Higher in TRIM24 | 141   | 313   | 74    | 72    | 1932 | 2195  | 2717  | 3057  | 1548  | 4052  |
| ENSMUSG00000030340.16 | Scn1a          | 4.54E-12 | 7.31E-10 | 4 | 6 | 1154.25  | 86.66666667 | 1067.583333 | 3.573557527 | 3.754636521 | Higher in Normal | 232   | 740   | 1752  | 1893  | 81   | 37    | 86    | 38    | 176   | 102   |
| ENSMUSG00000075707.5  | Dio3           | 4.65E-12 | 7.46E-10 | 4 | 6 | 4        | 274.333333  | 270.333333  | 5.38993812  | 6.195972243 | Higher in TRIM24 | 3     | 0     | 7     | 6     | 18   | 100   | 605   | 257   | 499   | 167   |
| ENSMUSG00000037962.7  | Rfina          | 5.51E-12 | 8.73E-10 | 4 | 6 | 41.25    | 499.1666667 | 307.9166667 | 3.025443541 | 3.135171496 | Higher in TRIM24 | 3     | 18    | 32    | 54    | 330  | 282   | 582   | 236   | 233   | 432   |
| ENSMUSG00000073680.2  | Tmem88b        | 6.96E-12 | 1.09E-09 | 4 | 6 | 2347.5   | 80.5        | 2267        | 4.544640305 | 4.948575428 | Higher in Normal | 462   | 230   | 4185  | 4513  | 89   | 18    | 44    | 33    | 128   | 171   |
| ENSMUSG00000086847.1  | Tbx3os2        | 7.75E-12 | 1.20E-09 | 4 | 6 | 71.75    | 4.83333333  | 66.91666667 | 3.928624508 | 4.180695636 | Higher in Normal | 67    | 68    | 62    | 90    | 0    | 1     | 8     | 3     | 2     | 15    |
| ENSMUSG00000024395.7  | Lims2          | 8.35E-12 | 1.29E-09 | 4 | 6 | 1459     | 114.5       | 1394.5      | 3.729285237 | 3.942657215 | Higher in Normal | 1914  | 2378  | 676   | 868   | 57   | 59    | 114   | 37    | 274   | 146   |
| ENSMUSG00000025479.9  | Cyp2e1         | 8.69E-12 | 1.34E-09 | 4 | 6 | 4232.75  | 43.3333333  | 4184.16667  | 5.918004692 | 6.96703866  | Higher in Normal | 11080 | 5400  | 186   | 265   | 38   | 15    | 47    | 2     | 94    | 64    |
| ENSMUSG00000074607.11 | Tox2           | 9.30E-12 | 1.42E-09 | 4 | 6 | 699.5    | 40          | 659.5       | 3.85984879  | 4.098764477 | Higher in Normal | 379   | 493   | 896   | 1030  | 67   | 5     | 59    | 19    | 63    | 27    |
| ENSMUSG00000095571.2  | Ighv5-17       | 1.00E-11 | 1.52E-09 | 4 | 6 | 97.25    | 1.666666667 | 95.58333333 | 5.236420845 | 5.96074656  | Higher in Normal | 11    | 180   | 73    | 125   | 3    | 1     | 0     | 2     | 2     | 2     |
| ENSMUSG00000095657.4  | Sfza2l1        | 1.01E-11 | 1.52E-09 | 4 | 6 | 1.25     | 180.833333  | 179.583333  | 5.593638217 | 6.650882964 | Higher in TRIM24 | 3     | 1     | 1     | 0     | 54   | 20    | 22    | 66    | 387   | 536   |
| ENSMUSG00000040284.4  | Gzmg           | 1.22E-11 | 1.84E-09 | 4 | 6 | 3        | 963.1666667 | 960.1666667 | 6.368280887 | 8.313067131 | Higher in TRIM24 | 3     | 3     | 4     | 2     | 6    | 1207  | 1610  | 8     | 2408  | 540   |
| ENSMUSG00000001739.14 | Cldn15         | 1.25E-11 | 1.88E-09 | 4 | 6 | 773.5    | 90          | 683.5       | 3.310815242 | 3.459597222 | Higher in Normal | 759   | 1314  | 436   | 585   | 32   | 23    | 90    | 76    | 101   | 218   |
| ENSMUSG00000101389.1  | Ms4a4a         | 1.39E-11 | 2.06E-09 | 4 | 6 | 133.25   | 1923.5      | 1790.25     | 3.366944889 | 3.528252097 | Higher in TRIM24 | 151   | 122   | 99    | 161   | 937  | 742   | 2625  | 943   | 462   | 5832  |
| ENSMUSG00000036144.6  | Meox2          | 1.63E-11 | 2.42E-09 | 4 | 6 | 1118.5   | 195         | 923.5       | 2.539778752 | 2.605559355 | Higher in Normal | 1158  | 1016  | 1013  | 1287  | 164  | 60    | 328   | 118   | 266   | 234   |
| ENSMUSG00000029334.14 | Prkg2          | 1.82E-11 | 2.68E-09 | 4 | 6 | 75.25    | 5574.83333  | 5499.583333 | 5.365212767 | 6.214162593 | Higher in TRIM24 | 165   | 37    | 58    | 41    | 262  | 8610  | 2469  | 8008  | 634   | 13466 |
| ENSMUSG00000037010.7  | Apln           | 1.88E-11 | 2.75E-09 | 4 | 6 | 303.25   | 3065.66667  | 2762.416667 | 3.200660443 | 3.339581295 | Higher in TRIM24 | 559   | 172   | 188   | 294   | 4027 | 2279  | 2891  | 2930  | 1261  | 5006  |
| ENSMUSG00000030867.7  | Plk1           | 2.01E-11 | 2.91E-09 | 4 | 6 | 181      | 1272.66667  | 1091.66667  | 2.784740489 | 2.874162042 | Higher in TRIM24 | 157   | 58    | 234   | 275   | 1516 | 444   | 1389  | 1289  | 1344  | 1654  |
| ENSMUSG00000056569.10 | Mpz            | 2.02E-11 | 2.91E-09 | 4 | 6 | 1632.25  | 70.66666667 | 1561.583333 | 4.357178013 | 4.727361077 | Higher in Normal | 163   | 2344  | 1810  | 2212  | 44   | 21    | 75    | 18    | 184   | 82    |
| ENSMUSG0000000223.13  | Drp2           | 2.26E-11 | 3.24E-09 | 4 | 6 | 911.25   | 71.16666667 | 840.083333  | 3.630147508 | 3.83514423  | Higher in Normal | 357   | 435   | 1521  | 1332  | 14   | 24    | 88    | 27    | 139   | 135   |
| ENSMUSG00000015085.8  | Entpd2         | 2.34E-11 | 3.35E-09 | 4 | 6 | 639.5    | 94          | 545.5       | 2.700800597 | 2.781797099 | Higher in Normal | 456   | 590   | 655   | 857   | 132  | 27    | 80    | 83    | 143   | 99    |
| ENSMUSG00000052062.14 | Pard3b         | 2.37E-11 | 3.37E-09 | 4 | 6 | 1013.5   | 154.6666667 | 858.833333  | 2.683612468 | 2.762981867 | Higher in Normal | 578   | 645   | 1603  | 1228  | 53   | 80    | 188   | 113   | 271   | 223   |
| ENSMUSG00000024140.9  | Epas1          | 2.44E-11 | 3.45E-09 | 4 | 6 | 15459.5  | 2889        | 12570.5     | 2.39890511  | 2.455063767 | Higher in Normal | 11566 | 10708 | 19172 | 20392 | 1709 | 2120  | 2916  | 1298  | 5835  | 3456  |
| ENSMUSG00000040147.14 | Maob           | 2.44E-11 | 3.45E-09 | 4 | 6 | 1390.25  | 162.5       | 1227.75     | 3.119029591 | 3.246188356 | Higher in Normal | 1439  | 1378  | 1238  | 1506  | 114  | 24    | 73    | 133   | 354   | 197   |
| ENSMUSG00000040170.13 | Fmo2           | 2.47E-11 | 3.47E-09 | 4 | 6 | 3753.5   | 178.1666667 | 3575.333333 | 4.226631905 | 4.564546967 | Higher in Normal | 1775  | 1762  | 5946  | 5531  | 198  | 38    | 173   | 17    | 456   | 287   |
| ENSMUSG00000033308.16 | Dpyd           | 2.49E-11 | 3.48E-09 | 4 | 6 | 868.75   | 43          | 825.75      | 4.154991314 | 4.474623234 | Higher in Normal | 629   | 586   | 1155  | 1105  | 45   | 10    | 39    | 2     | 115   | 47    |
| ENSMUSG00000022651.5  | Retnlg         | 2.93E-11 | 4.08E-09 | 4 | 6 | 8        | 258.6666667 | 250.6666667 | 4.37035045  | 4.778101587 | Higher in TRIM24 | 20    | 3     | 5     | 4     | 678  | 46    | 233   | 186   | 626   | 393   |
| ENSMUSG00000109305.1  | 1810010001Rlik | 3.04E-11 | 4.21E-09 | 4 | 6 | 318.25   | 14.66666667 | 303.5833333 | 4.350476929 | 4.727581843 | Higher in Normal | 33    | 389   | 360   | 491   | 4    | 7     | 23    | 4     | 8     | 42    |
| ENSMUSG00000085183.1  | Wincr1         | 3.22E-11 | 4.43E-09 | 4 | 6 | 5        | 883.333333  | 878.333333  | 5.816878895 | 7.111621844 | Higher in TRIM24 | 7     | 10    | 0     | 3     | 658  | 692   | 685   | 1102  | 2160  |       |
| ENSMUSG00000045392.8  | Ofrr1033       | 3.68E-11 | 5.03E-09 | 4 | 6 | 139      | 13.16666667 | 125.833333  | 3.447629449 | 3.625823993 | Higher in Normal | 78    | 94    | 200   | 184   | 5    | 12    | 3     | 3     | 18    | 38    |
| ENSMUSG00000005540.10 | Fcer2a         | 3.71E-11 | 5.05E-09 | 4 | 6 | 62       | 5.83333333  | 56.16666667 | 3.289309994 | 3.445905701 | Higher in Normal | 25    | 48    | 90    | 85    | 4    | 7     | 3     | 3     | 8     | 10    |
| ENSMUSG00000020407.13 | Upp1           | 3.75E-11 | 5.07E-09 | 4 | 6 | 578.75   | 5042.83333  | 4464.08333  | 2.787611076 | 2.880029401 | Higher in TRIM24 | 264   | 257   | 749   | 1045  | 3526 | 1952  | 3739  | 2052  | 3724  | 15264 |
| ENSMUSG00000031883.13 | Car7           | 3.95E-11 | 5.30E-09 | 4 | 6 | 205.5    | 28.3333333  | 177.1666667 | 2.934244399 | 3.04174432  | Higher in Normal | 358   | 163   | 125   | 176   | 13   | 11    | 31    | 19    | 51    | 45    |
| ENSMUSG00000024366.7  | Gfra3          | 4.07E-11 | 5.43E-09 | 4 | 6 | 67.75    | 4.16666667  | 63.58333333 | 3.840219679 | 4.098238464 | Higher in Normal | 53    | 53    | 84    | 81    | 1    | 2     | 3     | 2     | 14    | 3     |
| ENSMUSG00000033948.3  | Zswim5         | 4.30E-11 | 5.71E-09 | 4 | 6 | 285.5    | 20          | 265.5       | 3.677423479 | 3.898321371 | Higher in Normal | 136   | 56    | 522   | 428   | 10   | 6     | 14    | 13    | 43    | 34    |
| ENSMUSG00000024989.14 | Cep55          | 4.87E-11 | 6.44E-09 | 4 | 6 | 208.75   | 1207.16667  | 998.4166667 | 2.44310864  | 2.504931865 | Higher in TRIM24 | 143   | 56    | 331   | 305   | 996  | 728   | 1145  | 688   | 1412  | 2274  |
| ENSMUSG00000020193.3  | Zpbp           | 5.11E-11 | 6.74E-09 | 4 | 6 | 53.25    | 11.16666667 | 42.0833333  | 2.327146955 | 2.380147198 | Higher in Normal | 59    | 32    | 65    | 57    | 6    | 8     | 9     | 6     | 15    | 23    |
| ENSMUSG00000022853.6  | Ehhadh         | 5.23E-11 | 6.86E-09 | 4 | 6 | 1311.5   | 223.833333  | 1087.66667  | 2.454310622 | 2.516784268 | Higher in Normal | 1041  | 748   | 1600  | 1857  | 317  | 136   | 252   | 93    | 298   | 247   |
| ENSMUSG00000078532.9  | Nkain1         | 5.28E-11 | 6.91E-09 | 4 | 6 | 76.75    | 846.666667  | 769.9166667 | 3.334276763 | 3.5013753   | Higher in TRIM24 | 132   | 63    | 55    | 357   | 359  | 1007  | 1226  | 856   | 481   | 1151  |
| ENSMUSG00000032322.14 | Pstpip1        | 5.31E-11 | 6.91E-09 | 4 | 6 | 269.25   | 1868.83333  | 1599.583333 | 2.57237096  | 2.645389256 | Higher in TRIM24 | 269   | 337   | 185   | 286   | 1003 | 965   | 1662  | 2312  | 1307  | 3964  |
| ENSMUSG00000104213.5  | Lghd           | 5.88E-11 | 7.61E-09 | 4 | 6 | 232.5    | 16          | 216.5       | 3.635333446 | 3.85390767  | Higher in Normal | 103   | 383   | 199   | 245   | 6    | 18    | 23    | 14    | 24    | 11    |
| ENSMUSG00000095901.12 | Adamts14       | 5.92E-11 | 7.62E-09 | 4 | 6 | 128      | 2371        | 2243        | 3.850132497 | 4.120517632 | Higher in TRIM24 | 155   | 162   | 120   | 75    | 559  | 3999  | 2044  | 1149  | 1093  | 5382  |
| ENSMUSG00000041757.16 | Plekha6        | 6.01E-11 | 7.72E-09 | 4 | 6 | 4226.25  | 410.666667  | 3815.583333 | 3.238182192 | 3.387706964 | Higher in Normal | 2419  | 2271  | 6588  | 5627  | 394  | 96    | 246   | 313   | 1008  | 407   |
| ENSMUSG00000044092.8  | C130050018Rlik | 6.20E-11 | 7.90E-09 | 4 | 6 | 34       | 249.5       | 215.5       | 2.809502313 | 2.906925215 | Higher in TRIM24 | 29    | 32    | 40    | 35    | 141  | 315   | 361   | 133   | 192   | 355   |
| ENSMUSG00000055733.6  | Nap1l3         | 6.24E-11 | 7.92E-09 | 4 | 6 | 179.5    | 12.3333333  | 167.1666667 | 3.665830802 | 3.889785508 | Higher in Normal | 148   | 105   | 226   | 239   | 6    | 8     | 21    | 1     | 28    | 10    |
| ENSMUSG00000095256.6  | Gzmd           | 6.30E-11 | 7.96E-09 | 4 | 6 | 9.25     | 1130.83333  | 1121.583333 | 5.691149854 | 6.903466484 | Higher in TRIM24 | 25    | 0     | 5     | 7     | 178  | 1013  | 1880  | 66    | 3138  | 510   |
| ENSMUSG00000020808.3  | Pimreg         | 7.02E-11 | 8.80E-09 | 4 | 6 | 114.75   | 928.833333  | 814.083333  | 2.849253894 | 2.951333529 | Higher in TRIM24 | 93    | 37    | 135   | 194   | 398  | 406   |       |       |       |       |

|                       |               |          |          |   |   |          |             |              |             |             |                  |       |       |        |        |       |       |       |       |       |       |
|-----------------------|---------------|----------|----------|---|---|----------|-------------|--------------|-------------|-------------|------------------|-------|-------|--------|--------|-------|-------|-------|-------|-------|-------|
| ENSMUSG00000062329.4  | Cyt1          | 2.81E-10 | 3.07E-08 | 4 | 6 | 547.5    | 10          | 537.5        | 5.059693458 | 5.787247022 | Higher in Normal | 177   | 333   | 666    | 1014   | 12    | 1     | 12    | 0     | 33    | 2     |
| ENSMUSG00000072553.10 | Gm525         | 3.17E-10 | 3.42E-08 | 4 | 6 | 162      | 9           | 153          | 4.036285831 | 4.371447793 | Higher in Normal | 232   | 184   | 95     | 137    | 8     | 0     | 22    | 2     | 10    | 12    |
| ENSMUSG00000045775.15 | Slc16a5       | 3.30E-10 | 3.55E-08 | 4 | 6 | 372.25   | 19.33333333 | 352.9166667  | 4.065376188 | 4.408233078 | Higher in Normal | 203   | 39    | 598    | 649    | 9     | 16    | 18    | 2     | 15    | 56    |
| ENSMUSG00000039476.13 | Prrn2         | 3.35E-10 | 3.59E-08 | 4 | 6 | 116.75   | 1342        | 1225.25      | 3.075313388 | 3.216980251 | Higher in TRIM24 | 172   | 117   | 76     | 102    | 1464  | 283   | 1188  | 895   | 521   | 3701  |
| ENSMUSG00000059742.10 | Kcnh7         | 3.52E-10 | 3.77E-08 | 4 | 6 | 159      | 27.33333333 | 131.6666667  | 2.71355999  | 2.807037873 | Higher in Normal | 140   | 149   | 152    | 195    | 9     | 12    | 27    | 6     | 50    | 60    |
| ENSMUSG00000072966.11 | Grasp2        | 3.58E-10 | 3.79E-08 | 4 | 6 | 440.5    | 20          | 420.5        | 4.103770359 | 4.460201273 | Higher in Normal | 166   | 350   | 582    | 660    | 4     | 1     | 24    | 37    | 27    | 27    |
| ENSMUSG00000064247.14 | Plicd1        | 3.58E-10 | 3.79E-08 | 4 | 6 | 125      | 19.33333333 | 105.6666667  | 2.699549111 | 2.791925037 | Higher in Normal | 91    | 51    | 157    | 201    | 10    | 11    | 9     | 12    | 36    | 38    |
| ENSMUSG00000041423.16 | Paq6          | 3.60E-10 | 3.79E-08 | 4 | 6 | 554      | 41.66666667 | 512.3333333  | 3.719226394 | 3.975355301 | Higher in Normal | 268   | 591   | 588    | 769    | 22    | 9     | 38    | 5     | 118   | 58    |
| ENSMUSG00000071005.7  | Ccl19         | 3.62E-10 | 3.80E-08 | 4 | 6 | 101.75   | 2           | 99.75        | 4.967120386 | 5.686564956 | Higher in Normal | 6     | 46    | 119    | 236    | 0     | 1     | 3     | 1     | 4     | 3     |
| ENSMUSG00000031870.16 | Pgr           | 3.72E-10 | 3.90E-08 | 4 | 6 | 1283     | 90.66666667 | 1192.3333333 | 3.747734832 | 4.010976301 | Higher in Normal | 670   | 569   | 2320   | 1573   | 29    | 7     | 166   | 38    | 112   | 192   |
| ENSMUSG000000108624.1 | Gm45091       | 3.83E-10 | 3.99E-08 | 4 | 6 | 104.5    | 15.5        | 89           | 2.741343699 | 2.839293863 | Higher in Normal | 95    | 121   | 85     | 117    | 10    | 7     | 21    | 10    | 31    | 14    |
| ENSMUSG00000053964.7  | Lgals4        | 3.85E-10 | 4.00E-08 | 4 | 6 | 898.25   | 102         | 796.25       | 3.240865035 | 3.406078367 | Higher in Normal | 680   | 1396  | 744    | 773    | 111   | 51    | 23    | 37    | 202   | 188   |
| ENSMUSG00000052336.7  | Cx3cr1        | 3.92E-10 | 4.06E-08 | 4 | 6 | 309.25   | 4141        | 3831.75      | 3.530637898 | 3.755155569 | Higher in TRIM24 | 403   | 472   | 156    | 206    | 2846  | 3495  | 5246  | 6670  | 1569  | 5020  |
| ENSMUSG00000026343.6  | Gpr39         | 4.00E-10 | 4.13E-08 | 4 | 6 | 3.25     | 138.3333333 | 135.0833333  | 4.971495333 | 5.763731948 | Higher in TRIM24 | 7     | 1     | 2      | 3      | 45    | 420   | 140   | 79    | 78    | 68    |
| ENSMUSG00000026500.12 | Snat1         | 4.03E-10 | 4.14E-08 | 4 | 6 | 1241.5   | 6691.333333 | 5449.833333  | 2.323060097 | 2.381868384 | Higher in TRIM24 | 787   | 771   | 1718   | 1690   | 3675  | 4946  | 8020  | 5475  | 3327  | 14705 |
| ENSMUSG00000044628.4  | Rnf208        | 4.25E-10 | 4.36E-08 | 4 | 6 | 533.25   | 43.83333333 | 489.4166667  | 3.37181913  | 3.560692826 | Higher in Normal | 201   | 338   | 640    | 954    | 52    | 31    | 32    | 12    | 103   | 33    |
| ENSMUSG00000030554.16 | Symn          | 4.78E-10 | 4.86E-08 | 4 | 6 | 3861.75  | 346.3333333 | 3515.416667  | 3.306225432 | 3.48437138  | Higher in Normal | 1357  | 1434  | 6585   | 6071   | 191   | 153   | 642   | 109   | 535   | 448   |
| ENSMUSG00000105300.1  | Gm30613       | 4.88E-10 | 4.96E-08 | 4 | 6 | 80       | 1.166666667 | 78.83333333  | 5.436179636 | 6.458901996 | Higher in Normal | 18    | 23    | 145    | 134    | 0     | 0     | 1     | 0     | 0     | 6     |
| ENSMUSG00000034245.10 | Hdac11        | 4.92E-10 | 4.98E-08 | 4 | 6 | 1430     | 235.8333333 | 1194.166667  | 2.616165493 | 2.701411191 | Higher in Normal | 823   | 1050  | 1712   | 2135   | 359   | 66    | 160   | 100   | 331   | 399   |
| ENSMUSG00000056457.6  | Pr12c3        | 5.09E-10 | 5.11E-08 | 4 | 6 | 35.5     | 7437.166667 | 7401.666667  | 5.700524374 | 7.164568347 | Higher in TRIM24 | 98    | 16    | 11     | 17     | 808   | 235   | 6422  | 43    | 18794 | 18321 |
| ENSMUSG00000028194.15 | Ddah1         | 5.13E-10 | 5.14E-08 | 4 | 6 | 171.5    | 2021.5      | 1850         | 3.315388923 | 3.500653829 | Higher in TRIM24 | 225   | 219   | 106    | 136    | 662   | 1860  | 4304  | 963   | 2326  | 2014  |
| ENSMUSG00000048905.4  | 4930539E08Rik | 5.17E-10 | 5.16E-08 | 4 | 6 | 444.25   | 26          | 418.25       | 3.823687517 | 4.110806576 | Higher in Normal | 139   | 85    | 791    | 762    | 43    | 7     | 13    | 9     | 39    | 45    |
| ENSMUSG00000029762.6  | Akr1b8        | 5.18E-10 | 5.16E-08 | 4 | 6 | 702.5    | 5013.166667 | 4310.666667  | 2.534640662 | 2.612959682 | Higher in TRIM24 | 555   | 757   | 626    | 872    | 1842  | 2362  | 7592  | 3249  | 2825  | 12209 |
| ENSMUSG00000030345.3  | Fosb          | 5.32E-10 | 5.28E-08 | 4 | 6 | 73760.75 | 463.1666667 | 73297.58333  | 5.944638296 | 6.296662422 | Higher in Normal | 711   | 85    | 144009 | 150238 | 89    | 437   | 345   | 95    | 525   | 1288  |
| ENSMUSG00000057614.6  | Gnal1         | 5.42E-10 | 5.36E-08 | 4 | 6 | 3663     | 242.6666667 | 3420.333333  | 3.790358096 | 4.069715805 | Higher in Normal | 6371  | 6069  | 1086   | 1126   | 175   | 190   | 320   | 121   | 438   | 212   |
| ENSMUSG00000046782.14 | Ttcc6         | 5.90E-10 | 5.81E-08 | 4 | 6 | 607.25   | 17.83333333 | 589.4166667  | 4.690590641 | 5.270374384 | Higher in Normal | 318   | 526   | 991    | 594    | 47    | 1     | 3     | 1     | 17    | 38    |
| ENSMUSG00000004043.14 | Stat5a        | 5.98E-10 | 5.87E-08 | 4 | 6 | 5534.25  | 1069.333333 | 4464.916667  | 2.379059513 | 2.443183826 | Higher in Normal | 5068  | 2420  | 7318   | 7331   | 1243  | 369   | 1040  | 421   | 1762  | 1581  |
| ENSMUSG00000071178.11 | Serpina1b     | 6.03E-10 | 5.90E-08 | 4 | 6 | 747      | 76.83333333 | 670.1666667  | 3.232087047 | 3.399993304 | Higher in Normal | 1386  | 441   | 470    | 691    | 52    | 22    | 98    | 39    | 182   | 68    |
| ENSMUSG00000046093.9  | Hpcal4        | 6.10E-10 | 5.95E-08 | 4 | 6 | 342      | 5.5         | 336.5        | 5.138586131 | 5.956622395 | Higher in Normal | 43    | 23    | 658    | 644    | 2     | 3     | 5     | 0     | 17    | 6     |
| ENSMUSG00000012705.16 | Rtn1          | 6.52E-10 | 6.34E-08 | 4 | 6 | 10545    | 98.83333333 | 10446.16667  | 5.792723048 | 7.106322177 | Higher in Normal | 22417 | 19533 | 100    | 130    | 118   | 22    | 98    | 13    | 219   | 123   |
| ENSMUSG00000036777.8  | Anln          | 6.53E-10 | 6.34E-08 | 4 | 6 | 606      | 5005.166667 | 4399.166667  | 2.773161491 | 2.878548302 | Higher in TRIM24 | 383   | 215   | 1037   | 789    | 2015  | 1781  | 7053  | 2779  | 3581  | 12822 |
| ENSMUSG00000048644.6  | Ctbn1         | 6.64E-10 | 6.42E-08 | 4 | 6 | 200.25   | 1827.666667 | 1627.416667  | 3.130203786 | 3.28587332  | Higher in TRIM24 | 142   | 75    | 225    | 359    | 1252  | 922   | 3727  | 1837  | 794   | 2434  |
| ENSMUSG00000024053.10 | Emilin2       | 6.67E-10 | 6.42E-08 | 4 | 6 | 718.25   | 5906.166667 | 5187.916667  | 2.674940967 | 2.769070471 | Higher in TRIM24 | 724   | 914   | 626    | 609    | 1634  | 3286  | 8229  | 3654  | 3921  | 14713 |
| ENSMUSG00000083494.1  | Gm12873       | 6.74E-10 | 6.47E-08 | 4 | 6 | 523.25   | 9.83333333  | 513.4166667  | 4.977943445 | 5.709183037 | Higher in Normal | 95    | 878   | 444    | 676    | 2     | 0     | 7     | 27    | 16    | 7     |
| ENSMUSG00000040675.17 | Mthfd11       | 6.89E-10 | 6.60E-08 | 4 | 6 | 380.75   | 2413.666667 | 2032.916667  | 2.490690449 | 2.56594138  | Higher in TRIM24 | 282   | 145   | 522    | 574    | 1092  | 1122  | 3347  | 1768  | 1576  | 5577  |
| ENSMUSG00000045362.8  | Tnfrsf26      | 6.98E-10 | 6.66E-08 | 4 | 6 | 85.5     | 594.6666667 | 509.1666667  | 2.661545065 | 2.754460435 | Higher in TRIM24 | 77    | 65    | 97     | 103    | 138   | 525   | 820   | 358   | 840   | 887   |
| ENSMUSG00000026424.8  | Gpr371        | 7.36E-10 | 7.00E-08 | 4 | 6 | 46.25    | 4.166666667 | 42.08333333  | 3.350437258 | 3.54604324  | Higher in Normal | 78    | 27    | 49     | 31     | 2     | 3     | 4     | 8     | 5     | 5     |
| ENSMUSG00000022803.12 | Popdc2        | 7.71E-10 | 7.31E-08 | 4 | 6 | 402.75   | 38          | 364.75       | 3.349963911 | 3.54086965  | Higher in Normal | 316   | 327   | 418    | 550    | 8     | 14    | 72    | 10    | 77    | 47    |
| ENSMUSG00000084772.1  | Gm15473       | 8.16E-10 | 7.72E-08 | 4 | 6 | 5        | 384.1666667 | 379.1666667  | 5.05641107  | 5.946515941 | Higher in TRIM24 | 6     | 6     | 4      | 4      | 463   | 10    | 529   | 228   | 12    | 1063  |
| ENSMUSG00000050914.16 | Ankrd37       | 8.45E-10 | 7.94E-08 | 4 | 6 | 37.25    | 312.5       | 275.25       | 2.731845245 | 2.834108301 | Higher in TRIM24 | 2     | 3     | 34     | 39     | 153   | 65    | 201   | 289   | 562   | 605   |
| ENSMUSG00000037813.13 | D630003M21Rik | 8.47E-10 | 7.94E-08 | 4 | 6 | 230.5    | 39.66666667 | 190.8333333  | 2.522180699 | 2.600458899 | Higher in Normal | 199   | 95    | 294    | 334    | 38    | 10    | 32    | 26    | 75    | 57    |
| ENSMUSG00000100502.1  | Gm28286       | 8.75E-10 | 8.18E-08 | 4 | 6 | 520.5    | 5.166666667 | 45.08333333  | 3.344154904 | 3.536572056 | Higher in Normal | 40    | 72    | 43     | 46     | 5     | 2     | 2     | 1     | 11    | 10    |
| ENSMUSG00000012282.2  | Wnt8a         | 8.80E-10 | 8.19E-08 | 4 | 6 | 162.25   | 1.833333333 | 160.4166667  | 5.30186909  | 6.290963871 | Higher in Normal | 45    | 33    | 282    | 289    | 5     | 1     | 0     | 0     | 5     | 0     |
| ENSMUSG00000035914.11 | Cd276         | 8.99E-10 | 8.34E-08 | 4 | 6 | 754.75   | 4565.166667 | 3810.416667  | 2.584625242 | 2.670446754 | Higher in TRIM24 | 354   | 278   | 1090   | 1297   | 5761  | 2662  | 4406  | 3838  | 3303  | 7421  |
| ENSMUSG00000022546.4  | Gpt           | 9.05E-10 | 8.36E-08 | 4 | 6 | 3151.5   | 404.1666667 | 2747.333333  | 3.098281239 | 3.248412    | Higher in Normal | 4782  | 4849  | 1274   | 1701   | 251   | 162   | 270   | 284   | 777   | 681   |
| ENSMUSG00000015476.6  | Prrt1         | 9.06E-10 | 8.36E-08 | 4 | 6 | 262.5    | 36          | 226.5        | 2.939911191 | 3.06734299  | Higher in Normal | 181   | 486   | 187    | 196    | 32    | 19    | 32    | 18    | 70    | 45    |
| ENSMUSG00000021190.14 | Lgmn          | 9.87E-10 | 9.06E-08 | 4 | 6 | 4019     | 25394       | 21375        | 2.441896745 | 2.514057328 | Higher in TRIM24 | 2199  | 3729  | 4338   | 5810   | 16409 | 10335 | 26013 | 25823 | 11645 | 62139 |
| ENSMUSG000000091956.2 | C2cd4b        | 9.87E-10 | 9.06E-08 | 4 | 6 | 1213.75  | 5           | 1208.75      | 6.009714912 | 7.659186881 | Higher in Normal | 8     | 12    | 1889   | 2946   | 15    | 1     | 2     | 2     | 9     | 1     |
| ENSMUSG00000050952.15 | Trrp1         | 9.98E-10 | 9.13E-08 | 4 | 6 | 129.5    | 3.333333333 | 126.1666667  | 4.824192271 | 5.503672504 | Higher in Normal | 306   | 133   | 48     | 31     | 3     | 1     | 0     | 2     | 11    | 3     |
| ENSMUSG000000095788.6 | Sirpb1a       | 1.08E-09 | 9.83E-08 | 4 | 6 | 48.75    | 314.1666667 | 265.4166667  | 2.488584245 | 2.565905847 | Higher in TRIM24 | 38    | 73    | 29     | 55     | 184   | 296   | 368   | 202   | 251   | 584   |
| ENSMUSG00000044156.14 | Hepacam2      | 1.11E-09 | 1.01E-07 | 4 | 6 | 1240.5   | 57          | 1183.5       | 4.040196164 | 4.400719355 | Higher in Normal | 520   | 495   | 1822   | 2125   | 37    | 9     | 175   | 15    | 60    | 46    |
| ENSMUSG00000032374.1  | Plod2         | 1.23E-09 | 1.11E-07 | 4 | 6 | 821.75   | 7146.5      | 6324.75      | 2.721234377 | 2.824097033 | Higher in TRIM24 | 640   | 650   | 1040   | 957    | 3512  | 2795  | 5588  | 5579  | 2035  | 23370 |
| ENSMUSG00000016200.14 | Syt14         | 1.27E-09 | 1.15E-07 | 4 | 6 | 127.75   | 9.666666667 | 118.0833333  | 3.829116687 | 4.130946434 | Higher in Normal | 194   | 82    | 134    | 104    | 1     | 0     | 12    | 3     | 13    | 29    |
| ENSMUSG00000052353.13 | Cemip         | 1.30E-09 | 1.17E-07 | 4 | 6 | 48.5     | 780         | 731.5        | 3.583741008 | 3.837483996 | Higher in TRIM24 | 83    | 16    | 54     | 41     | 391   | 104   | 436   | 603   | 2086  |       |

|                        |                |          |          |   |   |          |             |             |             |             |                  |       |       |        |        |        |       |        |        |       |        |
|------------------------|----------------|----------|----------|---|---|----------|-------------|-------------|-------------|-------------|------------------|-------|-------|--------|--------|--------|-------|--------|--------|-------|--------|
| ENSMUSG00000021250.13  | Fos            | 3.27E-09 | 2.66E-07 | 4 | 6 | 111375   | 1960.333333 | 109414.6667 | 4.997312801 | 5.819013341 | Higher in Normal | 1785  | 1699  | 198923 | 243093 | 1605   | 657   | 1249   | 1555   | 2661  | 4035   |
| ENSMUSG00000052485.7   | Tmem171        | 3.47E-09 | 2.82E-07 | 4 | 6 | 9.5      | 280.333333  | 270.833333  | 4.386637285 | 4.945592257 | Higher in TRIM24 | 11    | 6     | 15     | 6      | 14     | 593   | 203    | 146    | 122   | 604    |
| ENSMUSG00000032572.9   | Col6a4         | 3.62E-09 | 2.93E-07 | 4 | 6 | 550.5    | 37.66666667 | 512.833333  | 3.781907585 | 4.093090466 | Higher in Normal | 329   | 155   | 984    | 734    | 4      | 6     | 60     | 11     | 57    | 88     |
| ENSMUSG00000034675.17  | Dbn1           | 3.65E-09 | 2.94E-07 | 4 | 6 | 827.25   | 6777        | 5949.75     | 2.865351791 | 2.994800545 | Higher in TRIM24 | 420   | 704   | 1016   | 1169   | 3460   | 5077  | 11726  | 4919   | 1990  | 13490  |
| ENSMUSG00000025330.6   | Pad14          | 3.65E-09 | 2.94E-07 | 4 | 6 | 109.25   | 2355.666667 | 2246.416667 | 4.179193423 | 4.6442634   | Higher in TRIM24 | 162   | 35    | 98     | 142    | 1235   | 5491  | 875    | 342    | 4530  | 1661   |
| ENSMUSG00000113769.1   | 5033406009Rrik | 3.96E-09 | 3.17E-07 | 4 | 6 | 30       | 209.1666667 | 179.1666667 | 2.649227772 | 2.750894857 | Higher in TRIM24 | 19    | 36    | 36     | 29     | 80     | 165   | 215    | 264    | 133   | 398    |
| ENSMUSG00000026271.5   | Gpr35          | 4.09E-09 | 3.26E-07 | 4 | 6 | 209      | 1339.666667 | 1130.666667 | 2.592275657 | 2.686924057 | Higher in TRIM24 | 307   | 61    | 250    | 218    | 920    | 1427  | 1595   | 520    | 1423  | 2153   |
| ENSMUSG00000030865.4   | Chp2           | 4.13E-09 | 3.28E-07 | 4 | 6 | 761      | 80.66666667 | 680.333333  | 3.283796714 | 3.481640235 | Higher in Normal | 631   | 667   | 869    | 877    | 20     | 9     | 91     | 37     | 202   | 125    |
| ENSMUSG00000009687.14  | Fxyd5          | 4.27E-09 | 3.38E-07 | 4 | 6 | 1276.25  | 9550.166667 | 8273.916667 | 2.761115059 | 2.877175755 | Higher in TRIM24 | 970   | 1827  | 955    | 1353   | 3239   | 10321 | 11744  | 10224  | 7056  | 14717  |
| ENSMUSG00000105541.1   | Gm43136        | 4.62E-09 | 3.63E-07 | 4 | 6 | 82.75    | 15.33333333 | 67.41666667 | 2.396959039 | 2.470964353 | Higher in Normal | 37    | 59    | 103    | 132    | 17     | 6     | 18     | 10     | 17    | 24     |
| ENSMUSG000000046807.0  | Lrrc75b        | 4.65E-09 | 3.64E-07 | 4 | 6 | 1869     | 143.333333  | 1725.666667 | 3.658267453 | 3.941803074 | Higher in Normal | 1114  | 833   | 2785   | 2744   | 37     | 20    | 79     | 42     | 444   | 238    |
| ENSMUSG00000012889.8   | Podn11         | 4.73E-09 | 3.69E-07 | 4 | 6 | 80.25    | 2930.166667 | 2849.916667 | 4.397064883 | 4.970603309 | Higher in TRIM24 | 81    | 121   | 57     | 62     | 73     | 1365  | 2771   | 4941   | 676   | 7755   |
| ENSMUSG00000030495.12  | Sic7a10        | 4.98E-09 | 3.87E-07 | 4 | 6 | 1389.5   | 15.66666667 | 1373.833333 | 5.552156307 | 6.867590925 | Higher in Normal | 2429  | 3064  | 29     | 36     | 12     | 3     | 11     | 1      | 57    | 10     |
| ENSMUSG00000026582.6   | Sele           | 5.00E-09 | 3.87E-07 | 4 | 6 | 4361     | 35.83333333 | 4325.166667 | 5.581538572 | 6.925684714 | Higher in Normal | 68    | 34    | 9210   | 8132   | 4      | 11    | 68     | 3      | 92    | 37     |
| ENSMUSG00000032315.6   | Cyp1a1         | 5.08E-09 | 3.92E-07 | 4 | 6 | 32.75    | 2           | 30.75       | 3.900045889 | 4.259232218 | Higher in Normal | 41    | 14    | 43     | 33     | 0      | 1     | 0      | 1      | 4     | 6      |
| ENSMUSG00000005611.15  | Mrv1           | 5.10E-09 | 3.93E-07 | 4 | 6 | 1120.25  | 115.3333333 | 1004.916667 | 3.106086391 | 3.273902996 | Higher in Normal | 396   | 387   | 1914   | 1784   | 60     | 39    | 181    | 60     | 222   | 130    |
| ENSMUSG000000049410.8  | Zfp683         | 5.25E-09 | 4.03E-07 | 4 | 6 | 57       | 3           | 54          | 4.053438503 | 4.459794866 | Higher in Normal | 58    | 13    | 92     | 65     | 3      | 0     | 0      | 1      | 6     | 8      |
| ENSMUSG00000028528.16  | Dnajc6         | 5.51E-09 | 4.20E-07 | 4 | 6 | 663.25   | 42.16666667 | 621.083333  | 3.801223558 | 4.127095875 | Higher in Normal | 309   | 167   | 1210   | 967    | 9      | 28    | 21     | 5      | 106   | 84     |
| ENSMUSG000000085651.1  | Gm11695        | 5.70E-09 | 4.33E-07 | 4 | 6 | 43.5     | 0.16666667  | 43.333333   | 5.681238368 | 7.250047389 | Higher in Normal | 10    | 6     | 84     | 74     | 0      | 0     | 0      | 1      | 0     | 0      |
| ENSMUSG00000049107.13  | Nfñ3           | 5.94E-09 | 4.50E-07 | 4 | 6 | 90       | 9.66666667  | 80.333333   | 3.227032424 | 3.419693279 | Higher in Normal | 80    | 141   | 77     | 62     | 7      | 3     | 19     | 2      | 15    | 12     |
| ENSMUSG00000019856.14  | Fam184a        | 5.96E-09 | 4.50E-07 | 4 | 6 | 141.25   | 19.8333333  | 121.4166667 | 3.084363907 | 3.248885155 | Higher in Normal | 208   | 113   | 144    | 100    | 4      | 3     | 20     | 7      | 25    | 60     |
| ENSMUSG00000031636.7   | Pdlim3         | 6.18E-09 | 4.66E-07 | 4 | 6 | 15892.75 | 541.333333  | 15351.41667 | 4.291747898 | 4.788133696 | Higher in Normal | 4862  | 5301  | 23354  | 30054  | 580    | 155   | 1280   | 32     | 965   | 236    |
| ENSMUSG00000021903.11  | Galtnt15       | 6.26E-09 | 4.71E-07 | 4 | 6 | 3612.75  | 418.5       | 3194.25     | 3.343764389 | 3.559291336 | Higher in Normal | 3001  | 4410  | 3608   | 3432   | 70     | 98    | 353    | 74     | 848   | 1068   |
| ENSMUSG00000021573.15  | Tppp           | 6.66E-09 | 4.98E-07 | 4 | 6 | 705.25   | 67.3333333  | 637.9166667 | 3.279102207 | 3.482305018 | Higher in Normal | 614   | 425   | 951    | 831    | 93     | 16    | 31     | 16     | 183   | 65     |
| ENSMUSG00000032735.14  | Abllim3        | 6.95E-09 | 5.19E-07 | 4 | 6 | 2420.25  | 272.1666667 | 2148.08333  | 3.240860104 | 3.437043026 | Higher in Normal | 2877  | 3000  | 1907   | 1897   | 43     | 147   | 314    | 65     | 607   | 457    |
| ENSMUSG000000043518.7  | Rai2           | 6.99E-09 | 5.20E-07 | 4 | 6 | 584      | 40.3333333  | 543.6666667 | 3.66838039  | 3.962751253 | Higher in Normal | 425   | 518   | 622    | 771    | 10     | 15    | 84     | 5      | 97    | 31     |
| ENSMUSG00000022836.10  | Myk1           | 7.27E-09 | 5.40E-07 | 4 | 6 | 22407.75 | 1424.5      | 20983.25    | 3.51951057  | 3.776838282 | Higher in Normal | 5123  | 5815  | 37527  | 41166  | 1033   | 471   | 2118   | 2107   | 1677  | 1141   |
| ENSMUSG00000026691.0   | Fmo3           | 7.36E-09 | 5.45E-07 | 4 | 6 | 64.25    | 2           | 62.25       | 4.559938162 | 5.198874528 | Higher in Normal | 20    | 10    | 102    | 125    | 0      | 1     | 2      | 2      | 2     | 7      |
| ENSMUSG00000027073.5   | Prg2           | 7.41E-09 | 5.48E-07 | 4 | 6 | 70.5     | 2.5         | 68          | 4.534931226 | 5.16696838  | Higher in Normal | 10    | 175   | 51     | 46     | 0      | 1     | 2      | 2      | 5     | 5      |
| ENSMUSG00000026420.16  | Iz4            | 7.43E-09 | 5.48E-07 | 4 | 6 | 12       | 680.833333  | 668.833333  | 4.96716439  | 5.949656695 | Higher in TRIM24 | 10    | 1     | 8      | 29     | 1166   | 796   | 57     | 13     | 1332  | 721    |
| ENSMUSG00000044062.7   | Plekhd10s      | 7.48E-09 | 5.50E-07 | 4 | 6 | 18.25    | 0.33333333  | 17.91666667 | 4.815360519 | 5.675707146 | Higher in Normal | 19    | 16    | 23     | 15     | 0      | 0     | 0      | 1      | 1     | 0      |
| ENSMUSG000000059498.13 | Fcgr3          | 7.59E-09 | 5.56E-07 | 4 | 6 | 591.5    | 6989        | 6397.5      | 3.16721209  | 3.355291164 | Higher in TRIM24 | 740   | 1061  | 250    | 315    | 3356   | 6374  | 10891  | 3984   | 3832  | 13497  |
| ENSMUSG000000096035.2  | Odaph          | 7.64E-09 | 5.58E-07 | 4 | 6 | 12.75    | 483.833333  | 471.083333  | 4.739509113 | 5.548681721 | Higher in TRIM24 | 31    | 11    | 6      | 3      | 166    | 1286  | 357    | 749    | 75    | 270    |
| ENSMUSG000000049112.9  | Xotr           | 7.68E-09 | 5.60E-07 | 4 | 6 | 3322     | 112.833333  | 3209.166667 | 4.306798905 | 4.817640582 | Higher in Normal | 2659  | 2701  | 3580   | 4348   | 259    | 13    | 224    | 13     | 145   | 23     |
| ENSMUSG00000029797.13  | Sspo           | 7.71E-09 | 5.60E-07 | 4 | 6 | 317.25   | 41          | 276.25      | 2.843950847 | 2.974131298 | Higher in Normal | 247   | 69    | 654    | 299    | 24     | 27    | 48     | 16     | 66    | 65     |
| ENSMUSG00000015652.9   | Steap1         | 8.02E-09 | 5.80E-07 | 4 | 6 | 49       | 1608.83333  | 1559.83333  | 4.167116331 | 4.655701259 | Higher in TRIM24 | 78    | 27    | 51     | 40     | 41     | 639   | 1536   | 1316   | 348   | 5773   |
| ENSMUSG00000020593.15  | Lpin1          | 8.24E-09 | 5.93E-07 | 4 | 6 | 5235.75  | 873.333333  | 4362.416667 | 2.568740392 | 2.663527278 | Higher in Normal | 7587  | 3417  | 5244   | 4695   | 954    | 464   | 739    | 279    | 1942  | 862    |
| ENSMUSG000000059201.12 | Lep            | 8.73E-09 | 6.25E-07 | 4 | 6 | 17564.25 | 159.666667  | 17404.58333 | 5.681707889 | 7.228635447 | Higher in Normal | 32541 | 37552 | 131    | 123    | 62     | 35    | 95     | 15     | 627   | 124    |
| ENSMUSG00000019987.9   | Arg1           | 8.94E-09 | 6.39E-07 | 4 | 6 | 1208.75  | 11105.5     | 9896.75     | 2.84856668  | 2.983036508 | Higher in TRIM24 | 749   | 1785  | 949    | 1352   | 13002  | 7981  | 6624   | 1774   | 15792 | 21460  |
| ENSMUSG000000044788.10 | Fads6          | 9.06E-09 | 6.46E-07 | 4 | 6 | 719.5    | 88.16666667 | 631.333333  | 2.84266602  | 2.974053612 | Higher in Normal | 288   | 426   | 1146   | 1018   | 176    | 50    | 66     | 33     | 89    | 115    |
| ENSMUSG00000028518.8   | Prkaa2         | 9.20E-09 | 6.54E-07 | 4 | 6 | 1130.25  | 96.3333333  | 1033.916667 | 3.39286273  | 3.6246926   | Higher in Normal | 645   | 421   | 2097   | 1358   | 66     | 28    | 100    | 17     | 274   | 93     |
| ENSMUSG00000025780.7   | Ithi5          | 9.23E-09 | 6.55E-07 | 4 | 6 | 7414.75  | 987.333333  | 6427.416667 | 2.991443977 | 3.145994677 | Higher in Normal | 8353  | 10655 | 5778   | 4873   | 503    | 596   | 1385   | 164    | 1836  | 1440   |
| ENSMUSG00000039092.9   | Sptlc3         | 9.53E-09 | 6.75E-07 | 4 | 6 | 174      | 10.8333333  | 163.1666667 | 3.856777052 | 4.211314834 | Higher in Normal | 96    | 94    | 226    | 280    | 7      | 0     | 9      | 1      | 31    | 17     |
| ENSMUSG000000071715.11 | Ncf4           | 9.62E-09 | 6.79E-07 | 4 | 6 | 253.25   | 2352.83333  | 2099.583333 | 3.021939535 | 3.185776167 | Higher in TRIM24 | 200   | 449   | 157    | 207    | 843    | 2262  | 3731   | 2520   | 2396  | 2365   |
| ENSMUSG00000036395.15  | Glib12         | 1.00E-08 | 7.04E-07 | 4 | 6 | 2647.75  | 77.16666667 | 2570.58333  | 4.7799982   | 5.539984436 | Higher in Normal | 4882  | 5334  | 213    | 162    | 51     | 15    | 54     | 15     | 228   | 100    |
| ENSMUSG00000015733.13  | Capza2         | 1.01E-08 | 7.05E-07 | 4 | 6 | 7240.5   | 381459.8333 | 374219.3333 | 4.731931129 | 5.548248159 | Higher in TRIM24 | 5004  | 5938  | 7769   | 10251  | 878329 | 9163  | 331340 | 137212 | 9770  | 922945 |
| ENSMUSG00000096844.1   | Igkv6-14       | 1.08E-08 | 7.50E-07 | 4 | 6 | 52.5     | 1.5         | 51          | 4.371814581 | 4.975285982 | Higher in Normal | 63    | 33    | 57     | 57     | 5      | 2     | 2      | 0      | 0     | 0      |
| ENSMUSG00000031785.16  | Adgrg1         | 1.08E-08 | 7.51E-07 | 4 | 6 | 8650.5   | 799.666667  | 7850.83333  | 3.222948113 | 3.421359831 | Higher in Normal | 2967  | 3282  | 13402  | 14951  | 613    | 279   | 826    | 326    | 2146  | 608    |
| ENSMUSG00000054196.6   | Ctscr1         | 1.26E-08 | 8.70E-07 | 4 | 6 | 244      | 4984.83333  | 4740.83333  | 3.769480514 | 4.121393267 | Higher in TRIM24 | 136   | 97    | 290    | 453    | 626    | 586   | 5603   | 5589   | 1847  | 15658  |
| ENSMUSG00000030187.15  | Klra2          | 1.33E-08 | 9.16E-07 | 4 | 6 | 115.75   | 694.1666667 | 578.416667  | 2.533974609 | 2.628970729 | Higher in TRIM24 | 99    | 128   | 92     | 144    | 506    | 1073  | 381    | 469    | 708   | 1028   |
| ENSMUSG00000030351.5   | Tspan11        | 1.41E-08 | 9.63E-07 | 4 | 6 | 128.75   | 1520.5      | 1391.75     | 2.968609178 | 3.127115877 | Higher in TRIM24 | 87    | 112   | 141    | 175    | 270    | 415   | 1497   | 757    | 706   | 5478   |
| ENSMUSG000000044206.3  | Vsig4          | 1.44E-08 | 9.84E-07 | 4 | 6 | 4.75     | 124.833333  | 120.083333  | 3.989548177 | 4.435287223 | Higher in TRIM24 | 11    | 4     | 3      | 1      | 65     | 66    | 246    | 13     | 76    | 283    |
| ENSMUSG00000027496.15  | Aurka          | 1.46E-08 | 9.92E-07 | 4 | 6 | 318.75   | 1937        | 1618.25     | 2.50878861  | 2.60121427  | Higher in TRIM24 | 207   | 123   | 403    | 542    | 1687   | 551   | 2045   | 2323   | 1309  | 3707   |
| ENSMUSG000000031137.17 | Igf13          | 1.53E-08 | 1.03E-06 | 4 | 6 | 563.25   | 41.16666667 | 522.083333  | 3.585       |             |                  |       |       |        |        |        |       |        |        |       |        |

|                         |            |          |          |   |   |          |             |             |             |             |                  |        |        |       |       |       |       |        |        |        |        |
|-------------------------|------------|----------|----------|---|---|----------|-------------|-------------|-------------|-------------|------------------|--------|--------|-------|-------|-------|-------|--------|--------|--------|--------|
| ENSMUSG00000036353.13   | P2ry12     | 2.68E-08 | 1.68E-06 | 4 | 6 | 73.75    | 525.3333333 | 451.5833333 | 2.516546879 | 2.61405214  | Higher in TRIM24 | 75     | 103    | 53    | 64    | 247   | 527   | 433    | 319    | 255    | 1371   |
| ENSMUSG00000024578.2    | Il17b      | 2.70E-08 | 1.68E-06 | 4 | 6 | 608      | 11.8333333  | 596.1666667 | 4.819811153 | 5.678139993 | Higher in Normal | 216    | 229    | 791   | 1196  | 13    | 0     | 19     | 0      | 36     | 3      |
| ENSMUSG00000007034.15   | Slc44a4    | 2.80E-08 | 1.74E-06 | 4 | 6 | 445.5    | 45.8333333  | 399.6666667 | 3.301172029 | 3.529670276 | Higher in Normal | 251    | 204    | 601   | 726   | 20    | 6     | 30     | 9      | 121    | 89     |
| ENSMUSG000000086284.1   | Fmripd1os  | 2.82E-08 | 1.75E-06 | 4 | 6 | 52       | 0.666666667 | 51.33333333 | 4.985665648 | 6.115993437 | Higher in Normal | 25     | 24     | 63    | 96    | 4     | 0     | 0      | 0      | 0      | 0      |
| ENSMUSG000000041592.16  | Sdk2       | 2.87E-08 | 1.78E-06 | 4 | 6 | 856.25   | 95.8333333  | 760.4166667 | 3.089283758 | 3.274283051 | Higher in Normal | 523    | 230    | 1635  | 1037  | 119   | 53    | 44     | 13     | 134    | 212    |
| ENSMUSG000000053279.6   | Alhd1a1    | 2.91E-08 | 1.80E-06 | 4 | 6 | 1739.75  | 90          | 1649.75     | 4.066245052 | 4.528696976 | Higher in Normal | 3172   | 2948   | 391   | 448   | 66    | 35    | 102    | 18     | 271    | 48     |
| ENSMUSG000000086416.1   | Gm14002    | 3.00E-08 | 1.84E-06 | 4 | 6 | 0.25     | 105         | 104.75      | 5.653629857 | 8.295179538 | Higher in TRIM24 | 0      | 0      | 1     | 0     | 5     | 8     | 221    | 157    | 3      | 236    |
| ENSMUSG000000063234.4   | Gpr84      | 3.03E-08 | 1.86E-06 | 4 | 6 | 18.25    | 206         | 187.75      | 3.37750404  | 3.635240604 | Higher in TRIM24 | 10     | 9      | 17    | 37    | 32    | 162   | 338    | 239    | 308    | 157    |
| ENSMUSG000000015745.9   | Plekha1    | 3.06E-08 | 1.87E-06 | 4 | 6 | 1041.75  | 6371.5      | 5329.75     | 2.346692236 | 2.4253288   | Higher in TRIM24 | 1043   | 1417   | 740   | 967   | 3756  | 2905  | 9124   | 5886   | 3158   | 13400  |
| ENSMUSG000000031980.9   | Agt        | 3.06E-08 | 1.87E-06 | 4 | 6 | 902.5    | 48.5        | 854         | 3.916241242 | 4.324405809 | Higher in Normal | 916    | 954    | 711   | 1029  | 134   | 4     | 23     | 5      | 71     | 54     |
| ENSMUSG000000020891.11  | Alox8      | 3.09E-08 | 1.88E-06 | 4 | 6 | 69.5     | 9.666666667 | 59.83333333 | 2.990864019 | 3.156151207 | Higher in Normal | 57     | 29     | 108   | 84    | 4     | 2     | 5      | 2      | 15     | 30     |
| ENSMUSG000000058396.7   | Gpr182     | 3.20E-08 | 1.94E-06 | 4 | 6 | 435.5    | 55.66666667 | 379.8333333 | 2.973285022 | 3.138049842 | Higher in Normal | 403    | 426    | 376   | 537   | 23    | 20    | 86     | 10     | 134    | 61     |
| ENSMUSG000000034911.8   | Ushbp1     | 3.25E-08 | 1.97E-06 | 4 | 6 | 2980.25  | 577.3333333 | 2402.916667 | 2.566318139 | 2.669700537 | Higher in Normal | 4075   | 4214   | 1695  | 1937  | 170   | 307   | 496    | 358    | 947    | 1186   |
| ENSMUSG000000048534.7   | Jaml       | 3.36E-08 | 2.03E-06 | 4 | 6 | 93.25    | 715.1666667 | 621.9166667 | 2.739768717 | 2.869656627 | Higher in TRIM24 | 120    | 88     | 77    | 88    | 239   | 596   | 1436   | 472    | 338    | 1210   |
| ENSMUSG000000090665.2   | Gad1-ps    | 3.41E-08 | 2.06E-06 | 4 | 6 | 7.25     | 96.5        | 89.25       | 3.365711952 | 3.62598592  | Higher in TRIM24 | 12     | 7      | 8     | 2     | 44    | 98    | 63     | 30     | 234    | 110    |
| ENSMUSG000000042821.7   | Snai1      | 3.46E-08 | 2.08E-06 | 4 | 6 | 423.5    | 2791.833333 | 2368.333333 | 2.543546695 | 2.645931386 | Higher in TRIM24 | 226    | 200    | 565   | 703   | 1348  | 1285  | 3379   | 2810   | 1133   | 6796   |
| ENSMUSG00000002068.11   | Il18rap    | 3.57E-08 | 2.14E-06 | 4 | 6 | 82.5     | 1097.33333  | 1014.833333 | 3.049290173 | 3.234271292 | Higher in TRIM24 | 116    | 77     | 82    | 55    | 151   | 326   | 645    | 724    | 662    | 4076   |
| ENSMUSG000000054675.5   | Tmem119    | 3.59E-08 | 2.14E-06 | 4 | 6 | 459.75   | 3407.33333  | 2947.583333 | 2.724185197 | 2.852167312 | Higher in TRIM24 | 496    | 633    | 293   | 417   | 1190  | 2451  | 5013   | 4696   | 2352   | 4742   |
| ENSMUSG000000006675.10  | P4htm      | 3.61E-08 | 2.15E-06 | 4 | 6 | 202      | 37.8333333  | 164.1666667 | 2.507530221 | 2.604129133 | Higher in Normal | 156    | 173    | 210   | 269   | 13    | 10    | 46     | 16     | 83     | 59     |
| ENSMUSG000000076441.9   | Ass1       | 3.61E-08 | 2.15E-06 | 4 | 6 | 426.25   | 2874.83333  | 2448.833333 | 2.813094494 | 2.955127518 | Higher in TRIM24 | 221    | 263    | 533   | 688   | 5045  | 1456  | 2599   | 3864   | 2361   | 1924   |
| ENSMUSG000000086040.8   | Wipf3      | 3.72E-08 | 2.21E-06 | 4 | 6 | 811      | 45.5        | 765.5       | 3.801768078 | 4.175979236 | Higher in Normal | 161    | 166    | 1443  | 1474  | 25    | 23    | 30     | 7      | 140    | 48     |
| ENSMUSG000000043157.7   | Ar11       | 3.78E-08 | 2.25E-06 | 4 | 6 | 37       | 506.1666667 | 469.1666667 | 3.270426117 | 3.505978419 | Higher in TRIM24 | 67     | 58     | 7     | 16    | 359   | 369   | 583    | 317    | 242    | 1167   |
| ENSMUSG00000001095.5    | Slc13a2    | 3.82E-08 | 2.26E-06 | 4 | 6 | 295      | 19.8333333  | 275.1666667 | 3.809836708 | 4.187411804 | Higher in Normal | 139    | 408    | 285   | 348   | 5     | 8     | 10     | 1      | 69     | 26     |
| ENSMUSG000000028174.12  | Rpe65      | 3.85E-08 | 2.27E-06 | 4 | 6 | 298.75   | 7           | 291.75      | 4.968414474 | 5.962702681 | Higher in Normal | 32     | 66     | 486   | 611   | 0     | 1     | 1      | 0      | 9      | 31     |
| ENSMUSG000000041431.16  | Ccna1      | 3.85E-08 | 2.27E-06 | 4 | 6 | 301.5    | 2233.83333  | 1932.333333 | 2.697564795 | 2.822093225 | Higher in TRIM24 | 164    | 65     | 468   | 509   | 2871  | 625   | 1658   | 1305   | 2081   | 4863   |
| ENSMUSG000000030376.8   | Slc8a2     | 3.91E-08 | 2.30E-06 | 4 | 6 | 288.5    | 13.5        | 275         | 3.884901712 | 4.291801197 | Higher in Normal | 134    | 33     | 514   | 473   | 28    | 6     | 19     | 1      | 14     | 13     |
| ENSMUSG000000012428.9   | Steap4     | 3.94E-08 | 2.31E-06 | 4 | 6 | 9690.75  | 1379        | 8311.75     | 2.89347716  | 3.046791622 | Higher in Normal | 14662  | 11179  | 6218  | 6704  | 1672  | 240   | 908    | 630    | 2961   | 1863   |
| ENSMUSG000000004522.5   | Tlr8       | 3.95E-08 | 2.31E-06 | 4 | 6 | 67.75    | 469.5       | 401.75      | 2.690560215 | 2.814288695 | Higher in TRIM24 | 38     | 36     | 111   | 86    | 372   | 609   | 467    | 113    | 336    | 920    |
| ENSMUSG000000030905.5   | Crym       | 3.97E-08 | 2.32E-06 | 4 | 6 | 300.75   | 14.8333333  | 285.9166667 | 4.160749645 | 4.672598618 | Higher in Normal | 123    | 25     | 411   | 644   | 2     | 1     | 13     | 3      | 23     | 47     |
| ENSMUSG0000000036923.12 | Stox1      | 4.03E-08 | 2.35E-06 | 4 | 6 | 157.75   | 33.5        | 124.25      | 2.354643372 | 2.434368912 | Higher in Normal | 115    | 77     | 215   | 224   | 11    | 8     | 41     | 19     | 41     | 81     |
| ENSMUSG000000026204.15  | Ptprn      | 4.08E-08 | 2.37E-06 | 4 | 6 | 104      | 1927.166667 | 1823.166667 | 3.892486745 | 4.325666959 | Higher in TRIM24 | 201    | 31     | 96    | 88    | 134   | 1368  | 2824   | 3842   | 886    | 2509   |
| ENSMUSG000000026840.4   | Lamc3      | 4.15E-08 | 2.41E-06 | 4 | 6 | 867.5    | 86.16666667 | 781.3333333 | 3.107313359 | 3.30122538  | Higher in Normal | 853    | 388    | 1230  | 999   | 12    | 126   | 111    | 44     | 53     | 171    |
| ENSMUSG000000093894.1   | Ighv1-53   | 4.29E-08 | 2.49E-06 | 4 | 6 | 42.5     | 1.33333333  | 41.16666667 | 4.491142062 | 5.211103308 | Higher in Normal | 8      | 76     | 41    | 45    | 1     | 0     | 1      | 0      | 5      | 1      |
| ENSMUSG000000015568.16  | Lpl        | 4.41E-08 | 2.55E-06 | 4 | 6 | 93459.25 | 3086.83333  | 90372.41667 | 4.47728756  | 5.152801092 | Higher in Normal | 183386 | 180084 | 4666  | 5701  | 2638  | 960   | 4562   | 1965   | 6250   | 2146   |
| ENSMUSG000000023992.14  | Trem2      | 4.51E-08 | 2.60E-06 | 4 | 6 | 126.25   | 2257.5      | 2131.25     | 3.550614979 | 3.865878856 | Higher in TRIM24 | 198    | 241    | 42    | 24    | 1441  | 1196  | 2371   | 2409   | 786    | 5342   |
| ENSMUSG0000000022227.4  | Mcpt1      | 4.64E-08 | 2.67E-06 | 4 | 6 | 1.75     | 101         | 99.25       | 4.766656168 | 5.807155068 | Higher in TRIM24 | 5      | 2      | 0     | 0     | 35    | 81    | 69     | 92     | 317    | 12     |
| ENSMUSG000000036896.5   | C1qc       | 4.73E-08 | 2.71E-06 | 4 | 6 | 2687.25  | 19624.16667 | 16936.91667 | 2.621839605 | 2.737194874 | Higher in TRIM24 | 2035   | 4480   | 1672  | 2562  | 11715 | 12828 | 23001  | 23641  | 8724   | 37836  |
| ENSMUSG000000021010.8   | Npas3      | 4.92E-08 | 2.87E-06 | 4 | 6 | 405.25   | 57.66666667 | 347.5833333 | 2.845947221 | 2.993482169 | Higher in Normal | 357    | 133    | 578   | 553   | 44    | 6     | 26     | 41     | 105    | 124    |
| ENSMUSG000000026580.16  | Selp       | 4.97E-08 | 2.84E-06 | 4 | 6 | 6963.25  | 115.833333  | 6847.416667 | 4.895231572 | 5.857791655 | Higher in Normal | 226    | 234    | 14342 | 13051 | 18    | 28    | 224    | 14     | 332    | 69     |
| ENSMUSG000000032033.11  | Barx2      | 5.07E-08 | 2.89E-06 | 4 | 6 | 3156.25  | 143.1666667 | 3013.083333 | 4.129440945 | 4.639524556 | Higher in Normal | 988    | 1770   | 4170  | 5697  | 29    | 20    | 75     | 19     | 603    | 113    |
| ENSMUSG000000035451.7   | Foxa1      | 5.13E-08 | 2.92E-06 | 4 | 6 | 2904.25  | 173.1666667 | 2731.083333 | 3.553095201 | 3.858837343 | Higher in Normal | 1208   | 1733   | 4183  | 4493  | 521   | 84    | 184    | 65     | 115    | 70     |
| ENSMUSG000000055430.4   | Nap15      | 5.18E-08 | 2.94E-06 | 4 | 6 | 320.25   | 16.5        | 303.75      | 4.099674061 | 4.599822296 | Higher in Normal | 480    | 680    | 518   | 63    | 9     | 6     | 16     | 5      | 50     | 13     |
| ENSMUSG000000046711.15  | Hmga1      | 5.55E-08 | 3.14E-06 | 4 | 6 | 854.25   | 9258.666667 | 8404.416667 | 3.165270525 | 3.381505844 | Higher in TRIM24 | 330    | 354    | 1288  | 1445  | 1052  | 6026  | 15388  | 5999   | 6847   | 20240  |
| ENSMUSG000000022132.15  | Cldn10     | 5.57E-08 | 3.15E-06 | 4 | 6 | 789.25   | 57.16666667 | 732.0833333 | 3.58697173  | 3.904172008 | Higher in Normal | 317    | 641    | 902   | 1297  | 22    | 2     | 92     | 31     | 138    | 58     |
| ENSMUSG000000079056.12  | Kcnip3     | 5.61E-08 | 3.16E-06 | 4 | 6 | 342      | 61.8333333  | 280.1666667 | 2.328031045 | 2.407262223 | Higher in Normal | 121    | 199    | 460   | 588   | 41    | 34    | 76     | 65     | 75     | 80     |
| ENSMUSG000000037872.5   | Ackr1      | 5.62E-08 | 3.16E-06 | 4 | 6 | 1527     | 63.16666667 | 1463.833333 | 4.0655779   | 4.553045306 | Higher in Normal | 270    | 347    | 2279  | 3212  | 14    | 24    | 105    | 14     | 192    | 30     |
| ENSMUSG000000036745.15  | Tll7       | 5.72E-08 | 3.21E-06 | 4 | 6 | 236.5    | 1823.166667 | 1586.666667 | 2.761816285 | 2.900170438 | Higher in TRIM24 | 172    | 213    | 308   | 253   | 503   | 1024  | 2771   | 2366   | 681    | 3594   |
| ENSMUSG00000001506.10   | Col1a1     | 5.96E-08 | 3.33E-06 | 4 | 6 | 10844.5  | 167144.5    | 156500      | 3.519108361 | 3.831210419 | Higher in TRIM24 | 11700  | 13641  | 8187  | 9850  | 12115 | 71689 | 450842 | 110415 | 164221 | 193585 |
| ENSMUSG00000003310.8    | Tmem132d   | 5.98E-08 | 3.33E-06 | 4 | 6 | 59.25    | 4           | 55.25       | 3.938615927 | 4.374338741 | Higher in Normal | 104    | 29     | 68    | 36    | 0     | 2     | 2      | 0      | 3      | 17     |
| ENSMUSG000000019326.14  | Aoc3       | 6.05E-08 | 3.36E-06 | 4 | 6 | 14841.5  | 740.833333  | 14100.66667 | 4.07443819  | 4.568291723 | Higher in Normal | 28346  | 27032  | 60027 | 1981  | 639   | 373   | 768    | 233    | 1949   | 483    |
| ENSMUSG000000023940.14  | Srgo1      | 6.11E-08 | 3.38E-06 | 4 | 6 | 132.75   | 967.333333  | 834.5833333 | 2.636884689 | 2.756471686 | Higher in TRIM24 | 115    | 30     | 186   | 200   | 535   | 251   | 713    | 620    | 2058   | 1627   |
| ENSMUSG000000062132.9   | Arhgap33os | 6.17E-08 | 3.41E-06 | 4 | 6 | 19.75    | 1           | 18.75       | 4.067567541 | 4.582406471 | Higher in Normal | 27     | 14     | 18    | 20    | 0     | 0     | 1      | 1      | 1      | 4      |
| ENSMUSG000000096515.5   | Igkv14-100 | 6.61E-08 | 3.64E-06 | 4 | 6 | 51.75    | 1.33333333  | 50.41666667 | 4.410874244 | 5.139696026 | Higher in Normal | 4      | 57     | 66    | 80    | 1     | 3     | 2      | 1      | 0      | 1      |
| ENSMUSG000000031444.16  | F10        | 6.66E-08 | 3.66E-06 | 4 | 6 | 66.5     | 1466.166667 | 1399.666667 | 3.971950941 | 4.459       |                  |        |        |       |       |       |       |        |        |        |        |

|                        |           |          |          |   |   |          |             |             |             |             |                  |       |       |       |       |       |        |        |        |        |        |
|------------------------|-----------|----------|----------|---|---|----------|-------------|-------------|-------------|-------------|------------------|-------|-------|-------|-------|-------|--------|--------|--------|--------|--------|
| ENSMUSG00000079685.10  | Ulbp1     | 1.15E-07 | 5.84E-06 | 4 | 6 | 289      | 2741.5      | 2452.5      | 3.105253132 | 3.320025144 | Higher in TRIM24 | 174   | 87    | 494   | 401   | 781   | 3191   | 4670   | 1618   | 874    | 5315   |
| ENSMUSG000000091971.3  | Hspa1a    | 1.24E-07 | 6.24E-06 | 4 | 6 | 17704.75 | 359.5       | 17345.25    | 4.830782129 | 5.832490167 | Higher in Normal | 175   | 181   | 31410 | 39053 | 47    | 84     | 167    | 331    | 306    | 1222   |
| ENSMUSG000000038077.7  | Kcna6     | 1.24E-07 | 6.25E-06 | 4 | 6 | 133.25   | 14.66666667 | 118.5833333 | 2.955476037 | 3.135573648 | Higher in Normal | 52    | 106   | 176   | 199   | 4     | 13     | 34     | 7      | 15     | 15     |
| ENSMUSG000000029379.10 | Cxcl3     | 1.28E-07 | 6.39E-06 | 4 | 6 | 50       | 1659.333333 | 1609.333333 | 4.217554511 | 4.869094479 | Higher in TRIM24 | 63    | 11    | 58    | 68    | 99    | 225    | 1808   | 195    | 6283   | 1346   |
| ENSMUSG000000015441.3  | Gzmf      | 1.28E-07 | 6.41E-06 | 4 | 6 | 8.25     | 1122.333333 | 1114.083333 | 5.218520164 | 7.042493201 | Higher in TRIM24 | 25    | 1     | 5     | 1     | 5     | 1140   | 2202   | 53     | 2790   | 548    |
| ENSMUSG000000025185.14 | Lx1d4     | 1.29E-07 | 6.45E-06 | 4 | 6 | 71       | 831.5       | 760.5       | 3.496598515 | 3.822746243 | Higher in TRIM24 | 29    | 37    | 133   | 85    | 318   | 1890   | 1031   | 437    | 235    | 1078   |
| ENSMUSG000000086077.7  | Gm14396   | 1.30E-07 | 6.48E-06 | 4 | 6 | 18.25    | 0.33333333  | 17.91666667 | 4.771313525 | 5.717270946 | Higher in Normal | 19    | 9     | 31    | 14    | 0     | 0      | 0      | 0      | 0      | 2      |
| ENSMUSG000000037379.7  | Spon2     | 1.32E-07 | 6.55E-06 | 4 | 6 | 2900     | 197.5       | 2702.5      | 3.641472847 | 3.999090685 | Higher in Normal | 998   | 1108  | 3887  | 5607  | 58    | 12     | 223    | 77     | 584    | 231    |
| ENSMUSG000000044155.11 | Lsm8      | 1.34E-07 | 6.65E-06 | 4 | 6 | 1110.25  | 63553       | 6242.75     | 4.560240932 | 5.466559815 | Higher in TRIM24 | 817   | 887   | 1153  | 1584  | 99002 | 1058   | 5029   | 42775  | 1899   | 231555 |
| ENSMUSG000000069792.5  | Wfdc17    | 1.34E-07 | 6.65E-06 | 4 | 6 | 141.75   | 1468.166667 | 1326.416667 | 2.803009944 | 2.958091161 | Higher in TRIM24 | 154   | 249   | 55    | 109   | 921   | 384    | 1904   | 401    | 1696   | 3503   |
| ENSMUSG000000010830.7  | Kdelr3    | 1.37E-07 | 6.75E-06 | 4 | 6 | 290.75   | 2988.166667 | 2697.416667 | 3.016187491 | 3.213805998 | Higher in TRIM24 | 215   | 291   | 237   | 420   | 374   | 1130   | 3749   | 4100   | 1493   | 7083   |
| ENSMUSG000000024810.16 | Il33      | 1.39E-07 | 6.83E-06 | 4 | 6 | 257.25   | 4067.666667 | 3810.416667 | 3.290686098 | 3.556102876 | Higher in TRIM24 | 134   | 194   | 340   | 361   | 4431  | 253    | 1353   | 813    | 4008   | 13548  |
| ENSMUSG000000045287.6  | Rtnr4r1   | 1.39E-07 | 6.83E-06 | 4 | 6 | 786      | 107.5       | 678.5       | 2.8783851   | 3.044067788 | Higher in Normal | 1003  | 1461  | 342   | 338   | 109   | 46     | 147    | 75     | 160    | 108    |
| ENSMUSG00000105632.1   | Gm43272   | 1.41E-07 | 6.91E-06 | 4 | 6 | 30.75    | 3.33333333  | 27.41666667 | 3.068243731 | 3.275694159 | Higher in Normal | 19    | 14    | 50    | 40    | 2     | 4      | 3      | 0      | 4      | 7      |
| ENSMUSG000000029661.16 | Col1a2    | 1.42E-07 | 6.97E-06 | 4 | 6 | 11818    | 244057.1667 | 232239.1667 | 3.972022861 | 4.493512083 | Higher in TRIM24 | 11001 | 12753 | 11053 | 12465 | 13020 | 52596  | 383626 | 675241 | 133421 | 206439 |
| ENSMUSG00000001025.8   | S100a6    | 1.44E-07 | 7.10E-06 | 4 | 6 | 6330.25  | 7524        | 68893.75    | 3.082833893 | 3.296229134 | Higher in TRIM24 | 3858  | 10968 | 3995  | 6500  | 10407 | 42176  | 73793  | 87276  | 36904  | 200788 |
| ENSMUSG000000037086.3  | Prr32     | 1.46E-07 | 7.10E-06 | 4 | 6 | 301.25   | 5.33333333  | 295.9166667 | 4.917897361 | 6.036243714 | Higher in Normal | 576   | 616   | 7     | 6     | 2     | 2      | 4      | 6      | 16     | 2      |
| ENSMUSG000000051726.6  | Kcnf1     | 1.50E-07 | 7.30E-06 | 4 | 6 | 7.5      | 295.8333333 | 288.3333333 | 4.581432038 | 5.527606547 | Higher in TRIM24 | 4     | 5     | 14    | 7     | 5     | 424    | 631    | 383    | 13     | 319    |
| ENSMUSG000000049538.14 | Adamts16  | 1.54E-07 | 7.48E-06 | 4 | 6 | 24       | 528         | 504         | 4.876766016 | 4.358623041 | Higher in TRIM24 | 57    | 16    | 19    | 4     | 20    | 4617   | 786    | 483    | 580    | 838    |
| ENSMUSG000000086256.1  | Gm12052   | 1.57E-07 | 7.59E-06 | 4 | 6 | 27       | 2.83333333  | 24.16666667 | 3.132587892 | 3.357290351 | Higher in Normal | 10    | 20    | 38    | 40    | 3     | 2      | 1      | 2      | 2      | 7      |
| ENSMUSG000000049649.8  | Gpr3      | 1.57E-07 | 7.59E-06 | 4 | 6 | 654      | 15.5        | 638.5       | 4.444379956 | 5.187924402 | Higher in Normal | 16    | 12    | 1186  | 1402  | 11    | 7      | 23     | 18     | 19     | 15     |
| ENSMUSG000000041272.11 | Tox       | 1.58E-07 | 7.63E-06 | 4 | 6 | 345.5    | 43.83333333 | 301.6666667 | 3.074536108 | 3.280911164 | Higher in Normal | 195   | 125   | 467   | 595   | 10    | 5      | 28     | 18     | 85     | 117    |
| ENSMUSG000000095007.1  | Igkv12-41 | 1.67E-07 | 8.00E-06 | 4 | 6 | 41.25    | 4.33333333  | 36.91666667 | 3.040004952 | 3.245613475 | Higher in Normal | 18    | 45    | 58    | 44    | 5     | 3      | 5      | 2      | 9      | 2      |
| ENSMUSG000000072663.12 | Spef2     | 1.69E-07 | 8.11E-06 | 4 | 6 | 192.75   | 30          | 162.75      | 3.036718427 | 3.235513231 | Higher in Normal | 267   | 229   | 133   | 142   | 5     | 11     | 5      | 46     | 99     |        |
| ENSMUSG000000027524.9  | Efn3      | 1.76E-07 | 8.40E-06 | 4 | 6 | 19.75    | 1.66666667  | 18.08333333 | 3.465022184 | 3.780014639 | Higher in Normal | 17    | 13    | 22    | 27    | 0     | 1      | 1      | 0      | 3      | 5      |
| ENSMUSG000000000197.7  | Nalcn     | 1.82E-07 | 8.65E-06 | 4 | 6 | 305      | 16.33333333 | 288.6666667 | 4.05789552  | 4.592420677 | Higher in Normal | 92    | 69    | 597   | 462   | 6     | 0      | 3      | 4      | 35     | 50     |
| ENSMUSG000000064293.14 | Cntn4     | 1.83E-07 | 8.70E-06 | 4 | 6 | 316.5    | 19.33333333 | 297.1666667 | 3.884127864 | 4.343057425 | Higher in Normal | 329   | 13    | 503   | 421   | 3     | 2      | 9      | 9      | 39     | 54     |
| ENSMUSG000000051111.16 | Svzc      | 1.87E-07 | 8.87E-06 | 4 | 6 | 448.5    | 34.83333333 | 413.6666667 | 3.483028216 | 3.800237941 | Higher in Normal | 102   | 309   | 668   | 715   | 5     | 3      | 71     | 27     | 41     | 62     |
| ENSMUSG000000062345.10 | Serp1nb2  | 1.99E-07 | 9.38E-06 | 4 | 6 | 12.25    | 782.8333333 | 770.5833333 | 4.96346718  | 6.412686625 | Higher in TRIM24 | 27    | 2     | 10    | 10    | 578   | 3056   | 137    | 53     | 1299   | 94     |
| ENSMUSG000000036655.8  | Colec11   | 2.01E-07 | 9.45E-06 | 4 | 6 | 79.25    | 12.66666667 | 66.58333333 | 2.815960132 | 2.973349875 | Higher in Normal | 43    | 71    | 90    | 113   | 4     | 1      | 6      | 7      | 23     | 35     |
| ENSMUSG000000046182.8  | Gsg11     | 2.05E-07 | 9.58E-06 | 4 | 6 | 155.75   | 71.66666667 | 148.5833333 | 3.991646917 | 4.505794458 | Higher in Normal | 35    | 84    | 232   | 272   | 1     | 0      | 6      | 5      | 26     | 5      |
| ENSMUSG00000104422.1   | Igkv1-14  | 2.06E-07 | 9.61E-06 | 4 | 6 | 206.25   | 6.33333333  | 199.9166667 | 4.26792289  | 4.929032644 | Higher in Normal | 11    | 94    | 334   | 386   | 8     | 0      | 15     | 6      | 1      | 8      |
| ENSMUSG000000038665.15 | Dgki      | 2.08E-07 | 9.69E-06 | 4 | 6 | 421.25   | 45.66666667 | 375.5833333 | 3.299390896 | 3.566365514 | Higher in Normal | 179   | 863   | 352   | 291   | 79    | 9      | 28     | 7      | 48     | 103    |
| ENSMUSG000000062542.11 | Syt9      | 2.10E-07 | 9.79E-06 | 4 | 6 | 531.75   | 21.5        | 510.25      | 4.052544242 | 4.594674418 | Higher in Normal | 283   | 762   | 888   | 884   | 3     | 10     | 38     | 2      | 67     | 9      |
| ENSMUSG000000074489.9  | Bglap3    | 2.17E-07 | 1.01E-05 | 4 | 6 | 4032.75  | 128.1666667 | 3904.583333 | 4.388972354 | 5.116202775 | Higher in Normal | 1733  | 1799  | 6688  | 5911  | 30    | 27     | 29     | 5      | 633    | 45     |
| ENSMUSG000000010751.15 | Tnfrsf22  | 2.20E-07 | 1.02E-05 | 4 | 6 | 217.5    | 1677.833333 | 1460.333333 | 2.89812518  | 3.078062546 | Higher in TRIM24 | 275   | 176   | 179   | 240   | 361   | 3060   | 1980   | 1165   | 1723   | 1778   |
| ENSMUSG000000045328.11 | Cenpe     | 2.20E-07 | 1.02E-05 | 4 | 6 | 422      | 2800        | 2378        | 2.513244127 | 2.626276754 | Higher in TRIM24 | 309   | 95    | 688   | 596   | 1879  | 640    | 2199   | 2912   | 2337   | 6833   |
| ENSMUSG000000035486.14 | Plk5      | 2.21E-07 | 1.02E-05 | 4 | 6 | 46.5     | 4           | 42.5        | 3.283334786 | 3.553193076 | Higher in Normal | 24    | 24    | 60    | 78    | 1     | 5      | 8      | 0      | 3      | 7      |
| ENSMUSG000000021779.16 | Thrb      | 2.22E-07 | 1.02E-05 | 4 | 6 | 847.25   | 165.8333333 | 681.4166667 | 2.56828942  | 2.687521471 | Higher in Normal | 1021  | 966   | 781   | 621   | 164   | 27     | 176    | 34     | 228    | 366    |
| ENSMUSG000000048981.1  | Krt31     | 2.25E-07 | 1.03E-05 | 4 | 6 | 44.25    | 1           | 43.25       | 4.726326256 | 5.741785795 | Higher in Normal | 11    | 6     | 74    | 86    | 0     | 0      | 0      | 0      | 2      | 4      |
| ENSMUSG000000040724.5  | Kcna2     | 2.38E-07 | 1.08E-05 | 4 | 6 | 286.5    | 27.33333333 | 259.1666667 | 3.63138327  | 4.002370423 | Higher in Normal | 222   | 390   | 264   | 270   | 6     | 3      | 6      | 2      | 57     | 90     |
| ENSMUSG000000028172.5  | Tacr3     | 2.39E-07 | 1.09E-05 | 4 | 6 | 131.25   | 7.66666667  | 123.5833333 | 3.68707648  | 4.083833787 | Higher in Normal | 101   | 31    | 201   | 192   | 23    | 1      | 3      | 1      | 6      | 12     |
| ENSMUSG00000005322.15  | Tns1      | 2.42E-07 | 1.10E-05 | 4 | 6 | 17040.25 | 3207.666667 | 13832.58333 | 2.360340897 | 2.452345304 | Higher in Normal | 22672 | 18505 | 15067 | 11917 | 1321  | 2912   | 5165   | 1817   | 4939   | 3092   |
| ENSMUSG000000020592.14 | Sdc1c     | 2.44E-07 | 1.11E-05 | 4 | 6 | 3896.5   | 30013       | 26116.5     | 2.876604745 | 3.053618369 | Higher in TRIM24 | 1311  | 1337  | 5592  | 7346  | 10063 | 41679  | 16267  | 19142  | 43495  | 49432  |
| ENSMUSG000000085868.6  | Defb50    | 2.48E-07 | 1.12E-05 | 4 | 6 | 24.75    | 0.33333333  | 24.41666667 | 4.89187301  | 6.138571044 | Higher in Normal | 2     | 29    | 30    | 38    | 0     | 0      | 1      | 0      | 1      | 0      |
| ENSMUSG000000046699.14 | Slitrk4   | 2.55E-07 | 1.15E-05 | 4 | 6 | 198.75   | 14.33333333 | 184.4166667 | 3.788413526 | 4.221909811 | Higher in Normal | 184   | 291   | 166   | 154   | 10    | 1      | 1      | 2      | 44     | 28     |
| ENSMUSG000000071230.6  | Npw       | 2.56E-07 | 1.15E-05 | 4 | 6 | 311.25   | 14.66666667 | 296.5833333 | 3.820574702 | 4.270443005 | Higher in Normal | 58    | 58    | 417   | 712   | 36    | 1      | 13     | 11     | 8      | 19     |
| ENSMUSG000000069516.8  | Lyz2      | 2.56E-07 | 1.15E-05 | 4 | 6 | 15284.25 | 120975.6667 | 105691.4167 | 2.6442197   | 2.779086188 | Higher in TRIM24 | 15594 | 19755 | 10571 | 15217 | 35428 | 111839 | 179018 | 59506  | 45227  | 294836 |
| ENSMUSG000000036585.15 | Fgf1      | 2.57E-07 | 1.15E-05 | 4 | 6 | 3031.25  | 166.666667  | 2864.583333 | 3.696242091 | 4.095108302 | Higher in Normal | 780   | 1584  | 4699  | 5062  | 192   | 44     | 29     | 161    | 524    | 50     |
| ENSMUSG000000084793.1  | Gm2568    | 2.63E-07 | 1.18E-05 | 4 | 6 | 33.5     | 2.83333333  | 30.66666667 | 3.515974568 | 3.852244617 | Higher in Normal | 44    | 12    | 35    | 43    | 0     | 0      | 1      | 2      | 5      | 9      |
| ENSMUSG00000005058.13  | Prokr2    | 2.65E-07 | 1.19E-05 | 4 | 6 | 18       | 250         | 232         | 3.499514918 | 3.849263401 | Higher in TRIM24 | 4     | 9     | 14    | 7     | 66    | 435    | 318    | 68     | 373    | 240    |
| ENSMUSG0000000098874.1 | Gm27960   | 2.73E-07 | 1.22E-05 | 4 | 6 | 2.75     | 120.666667  | 117.9166667 | 4.324158974 | 5.128491131 | Higher in TRIM24 | 1     | 3     | 3     | 4     | 234   | 6      | 60     | 33     | 8      | 383    |
| ENSMUSG000000038567.5  | Cyp24a1   | 2.74E-07 | 1.22E-05 | 4 | 6 | 540.25   | 25.83333333 | 514.4166667 | 3.956072142 | 4.465484827 | Higher in Normal | 138   | 30    | 1007  | 986   | 49    | 5      | 10     | 3      | 29     | 59     |
| ENSMUSG000000041134.15 | Cyrr1     | 2.83E-07 | 1.26E-05 | 4 | 6 | 1598.75  | 190.3333333 | 1408.416667 | 2.886707745 | 3.063571753 | Higher in Normal | 874   | 413   | 3045  | 2063  | 71    | 158    | 247    | 41     |        |        |

|                        |           |          |          |   |   |           |             |             |             |             |                  |        |        |        |        |        |      |        |       |       |        |
|------------------------|-----------|----------|----------|---|---|-----------|-------------|-------------|-------------|-------------|------------------|--------|--------|--------|--------|--------|------|--------|-------|-------|--------|
| ENSMUSG00000055926.2   | Gm14137   | 4.51E-07 | 1.89E-05 | 4 | 6 | 48.25     | 588.5       | 540.25      | 3.168796877 | 3.427828084 | Higher in TRIM24 | 51     | 55     | 52     | 35     | 36     | 656  | 359    | 235   | 1130  | 1115   |
| ENSMUSG00000028238.6   | Atp6vDd2  | 4.53E-07 | 1.89E-05 | 4 | 6 | 62.5      | 981.3333333 | 918.8333333 | 3.413194665 | 3.748761787 | Higher in TRIM24 | 111    | 92     | 18     | 29     | 331    | 384  | 663    | 1792  | 296   | 2422   |
| ENSMUSG00000024056.9   | Ndc80     | 4.63E-07 | 1.93E-05 | 4 | 6 | 222.75    | 1646.666667 | 1423.916667 | 2.553164722 | 2.679544846 | Higher in TRIM24 | 191    | 81     | 269    | 350    | 760    | 331  | 864    | 831   | 3925  | 3169   |
| ENSMUSG00000002578.17  | Izkf4     | 4.64E-07 | 1.93E-05 | 4 | 6 | 1841.5    | 171         | 1670.5      | 3.242971512 | 3.51301838  | Higher in Normal | 489    | 243    | 3151   | 3483   | 198    | 22   | 153    | 65    | 241   | 347    |
| ENSMUSG000000032327.14 | Str6      | 4.72E-07 | 1.96E-05 | 4 | 6 | 263       | 3116        | 2853        | 3.467738271 | 3.823222161 | Higher in TRIM24 | 110    | 53     | 374    | 515    | 7435   | 1995 | 3749   | 957   | 3736  | 824    |
| ENSMUSG00000005800.3   | Mmp8      | 4.77E-07 | 1.98E-05 | 4 | 6 | 16.5      | 297.5       | 281         | 3.679796795 | 4.123389936 | Higher in TRIM24 | 49     | 3      | 8      | 6      | 49     | 430  | 272    | 120   | 469   | 445    |
| ENSMUSG000000098836.1  | Gm27572   | 4.79E-07 | 1.98E-05 | 4 | 6 | 51.75     | 6.166666667 | 45.58333333 | 3.11482423  | 3.349668964 | Higher in Normal | 52     | 20     | 58     | 77     | 7      | 0    | 2      | 1     | 9     | 18     |
| ENSMUSG000000030873.9  | Snm1b     | 4.79E-07 | 1.98E-05 | 4 | 6 | 3375.75   | 85.66666667 | 3290.083333 | 4.504185581 | 5.380137663 | Higher in Normal | 560    | 1222   | 5284   | 6437   | 54     | 9    | 22     | 2     | 408   | 19     |
| ENSMUSG00000067786.16  | Scn11     | 4.97E-07 | 2.05E-05 | 4 | 6 | 19526     | 390.5       | 19135.5     | 4.787335093 | 5.92231066  | Higher in Normal | 26810  | 50619  | 387    | 288    | 148    | 179  | 1201   | 36    | 535   | 244    |
| ENSMUSG00000082902.3   | Ccl19-ps1 | 5.11E-07 | 2.10E-05 | 4 | 6 | 37.5      | 0.333333333 | 37.16666667 | 5.012284047 | 6.535528116 | Higher in Normal | 1      | 13     | 60     | 76     | 0      | 0    | 1      | 0     | 1     | 0      |
| ENSMUSG000000084920.1  | Sic22a3   | 5.15E-07 | 2.12E-05 | 4 | 6 | 45.25     | 1.833333333 | 43.41666667 | 4.122638811 | 4.767744229 | Higher in Normal | 15     | 27     | 71     | 68     | 1      | 0    | 0      | 0     | 8     | 2      |
| ENSMUSG00000044786.6   | Zfp36     | 5.24E-07 | 2.15E-05 | 4 | 6 | 67536.5   | 2608        | 64928.5     | 3.967665787 | 4.514979017 | Higher in Normal | 2076   | 2320   | 118074 | 147676 | 2691   | 1666 | 2677   | 1762  | 4148  | 2704   |
| ENSMUSG000000023828.2  | Sic22a3   | 5.25E-07 | 2.15E-05 | 4 | 6 | 911.25    | 42.33333333 | 868.9166667 | 4.078912941 | 4.685029273 | Higher in Normal | 1551   | 1363   | 351    | 380    | 71     | 4    | 18     | 2     | 136   | 23     |
| ENSMUSG00000100782.1   | Gm28231   | 5.27E-07 | 2.15E-05 | 4 | 6 | 2         | 66.16666667 | 64.16666667 | 4.306905804 | 5.170069065 | Higher in TRIM24 | 3      | 1      | 4      | 0      | 7      | 130  | 77     | 56    | 8     | 119    |
| ENSMUSG000000097789.2  | Gm2115    | 5.34E-07 | 2.18E-05 | 4 | 6 | 39.25     | 1430.166667 | 1390.916667 | 4.148962973 | 4.861465968 | Higher in TRIM24 | 103    | 26     | 15     | 13     | 70     | 1448 | 1619   | 710   | 74    | 4660   |
| ENSMUSG000000055937.1  | Krt28     | 5.34E-07 | 2.18E-05 | 4 | 6 | 80.75     | 3.333333333 | 37.16666667 | 4.223128907 | 4.914726757 | Higher in Normal | 37     | 6      | 129    | 151    | 0      | 0    | 1      | 1     | 7     | 11     |
| ENSMUSG000000020788.15 | Atp2a3    | 5.49E-07 | 2.23E-05 | 4 | 6 | 2096      | 304.6666667 | 1791.333333 | 2.70594717  | 2.85775002  | Higher in Normal | 956    | 2644   | 2419   | 2365   | 105    | 119  | 735    | 166   | 404   | 299    |
| ENSMUSG000000070524.1  | Fcrlb     | 5.65E-07 | 2.28E-05 | 4 | 6 | 45.5      | 649.6666667 | 603.6666667 | 3.412352473 | 3.754713555 | Higher in TRIM24 | 122    | 17     | 31     | 12     | 153    | 602  | 953    | 661   | 219   | 1307   |
| ENSMUSG000000021892.14 | Sh3bp5    | 5.65E-07 | 2.28E-05 | 4 | 6 | 6409.5    | 953.3333333 | 5456.166667 | 2.492322203 | 2.609358017 | Higher in Normal | 3138   | 3203   | 8913   | 10384  | 370    | 1365 | 1238   | 482   | 1090  | 1175   |
| ENSMUSG000000035681.7  | Kcnc2     | 5.79E-07 | 2.33E-05 | 4 | 6 | 285.75    | 53.66666667 | 232.0833333 | 2.670430231 | 2.816384325 | Higher in Normal | 372    | 285    | 263    | 223    | 7      | 28   | 17     | 30    | 74    | 166    |
| ENSMUSG000000001930.17 | Vwf       | 5.85E-07 | 2.35E-05 | 4 | 6 | 6364.75   | 782.5       | 5582.25     | 2.798914122 | 2.898667982 | Higher in Normal | 2134   | 2713   | 11245  | 9367   | 521    | 750  | 1505   | 232   | 948   | 739    |
| ENSMUSG000000095682.1  | Igkv3-1   | 5.90E-07 | 2.36E-05 | 4 | 6 | 174.5     | 5           | 169.5       | 4.61549303  | 5.619551032 | Higher in Normal | 4      | 496    | 85     | 113    | 9      | 0    | 4      | 0     | 4     | 13     |
| ENSMUSG000000020303.2  | Stc2      | 5.95E-07 | 2.37E-05 | 4 | 6 | 3402.75   | 465.5       | 2937.25     | 2.730864484 | 2.88829428  | Higher in Normal | 4868   | 3636   | 2291   | 2816   | 746    | 99   | 741    | 357   | 568   | 282    |
| ENSMUSG000000069920.1  | B3gnt9    | 6.10E-07 | 2.43E-05 | 4 | 6 | 112.75    | 971.3333333 | 858.5833333 | 2.697017851 | 2.851938637 | Higher in TRIM24 | 92     | 124    | 110    | 125    | 117    | 369  | 1012   | 1081  | 582   | 2667   |
| ENSMUSG000000035864.14 | Syt1      | 6.27E-07 | 2.49E-05 | 4 | 6 | 383.75    | 26.5        | 357.25      | 3.776158317 | 4.242081149 | Higher in Normal | 183    | 38     | 703    | 611    | 15     | 3    | 5      | 2     | 46    | 88     |
| ENSMUSG000000076538.1  | Igkv13-84 | 6.28E-07 | 2.49E-05 | 4 | 6 | 50.75     | 1           | 49.75       | 4.518447935 | 5.53046838  | Higher in Normal | 123    | 6      | 27     | 47     | 3      | 1    | 2      | 0     | 0     | 0      |
| ENSMUSG000000047730.17 | Fcgbp     | 6.52E-07 | 2.59E-05 | 4 | 6 | 137670.25 | 2818        | 134852.25   | 4.670635824 | 5.726208492 | Higher in Normal | 21553  | 31583  | 267225 | 230320 | 357    | 166  | 631    | 152   | 15069 | 533    |
| ENSMUSG000000028631.7  | Kcng4     | 6.54E-07 | 2.59E-05 | 4 | 6 | 396       | 52.5        | 343.5       | 2.854526882 | 3.038024873 | Higher in Normal | 620    | 585    | 203    | 176    | 40     | 45   | 78     | 15    | 93    | 44     |
| ENSMUSG000000023064.4  | Sncg      | 6.64E-07 | 2.62E-05 | 4 | 6 | 14297.75  | 614.1666667 | 13683.58333 | 4.152818449 | 4.816115513 | Higher in Normal | 25770  | 26505  | 1870   | 3046   | 867    | 53   | 599    | 94    | 1842  | 230    |
| ENSMUSG000000020374.16 | Rasgef1c  | 6.66E-07 | 2.63E-05 | 4 | 6 | 493.25    | 17.5        | 475.75      | 4.242024316 | 4.961938413 | Higher in Normal | 92     | 252    | 717    | 912    | 5      | 2    | 2      | 85    | 9     | 9      |
| ENSMUSG000000096140.1  | Ankrd66   | 6.77E-07 | 2.66E-05 | 4 | 6 | 3.5       | 63.5        | 60          | 3.514314981 | 3.914795792 | Higher in TRIM24 | 6      | 6      | 2      | 0      | 8      | 29   | 68     | 68    | 72    | 136    |
| ENSMUSG000000105746.1  | Gm43595   | 7.03E-07 | 2.75E-05 | 4 | 6 | 26.5      | 1.5         | 25          | 3.805526508 | 4.315374957 | Higher in Normal | 48     | 16     | 3      | 8      | 3      | 0    | 6      | 1     | 2     | 3      |
| ENSMUSG000000075588.6  | Hoxb2     | 7.19E-07 | 2.81E-05 | 4 | 6 | 213.25    | 49.33333333 | 163.9166667 | 2.335610155 | 2.432797245 | Higher in Normal | 330    | 235    | 174    | 114    | 13     | 22   | 32     | 38    | 67    | 124    |
| ENSMUSG000000015619.10 | Gata3     | 7.37E-07 | 2.87E-05 | 4 | 6 | 7058      | 1087.666667 | 5970.333333 | 2.575445438 | 2.708322218 | Higher in Normal | 4169   | 4934   | 8338   | 10791  | 639    | 515  | 896    | 624   | 3240  | 612    |
| ENSMUSG000000061780.6  | Cfd       | 7.46E-07 | 2.90E-05 | 4 | 6 | 82505     | 1990.833333 | 80514.16667 | 4.690337365 | 5.784047066 | Higher in Normal | 105606 | 221479 | 1154   | 1781   | 1394   | 471  | 2316   | 145   | 6216  | 1403   |
| ENSMUSG000000024672.11 | Ms4a7     | 7.61E-07 | 2.95E-05 | 4 | 6 | 375.5     | 5126.5      | 4751        | 2.990474342 | 3.21325306  | Higher in TRIM24 | 337    | 691    | 193    | 281    | 3523   | 797  | 2175   | 3647  | 1689  | 18928  |
| ENSMUSG000000035849.14 | Krt222    | 7.67E-07 | 2.97E-05 | 4 | 6 | 95.75     | 19.83333333 | 75.91666667 | 2.419061279 | 2.528370029 | Higher in Normal | 165    | 106    | 65     | 47     | 11     | 8    | 17     | 11    | 36    | 36     |
| ENSMUSG000000043913.14 | Ccdc60    | 7.77E-07 | 3.00E-05 | 4 | 6 | 127.75    | 7.333333333 | 120.4166667 | 3.981227712 | 4.557062248 | Higher in Normal | 151    | 31     | 207    | 122    | 0      | 3    | 1      | 0     | 15    | 25     |
| ENSMUSG000000071561.2  | BC100530  | 7.82E-07 | 3.01E-05 | 4 | 6 | 2.5       | 492.1666667 | 489.6666667 | 5.125309972 | 7.500851765 | Higher in TRIM24 | 2      | 0      | 3      | 5      | 497    | 3    | 12     | 2200  | 238   |        |
| ENSMUSG000000034551.12 | Hdx       | 7.82E-07 | 3.01E-05 | 4 | 6 | 166.75    | 18.66666667 | 148.0833333 | 3.006685235 | 3.227146048 | Higher in Normal | 71     | 31     | 345    | 220    | 4      | 9    | 25     | 7     | 33    | 34     |
| ENSMUSG000000059857.15 | Ntng1     | 7.89E-07 | 3.04E-05 | 4 | 6 | 1524.5    | 101.8333333 | 1422.666667 | 3.538907581 | 3.920218787 | Higher in Normal | 563    | 889    | 2304   | 2342   | 258    | 5    | 20     | 50    | 130   | 148    |
| ENSMUSG0000000249892.7 | Rasd1     | 7.91E-07 | 3.04E-05 | 4 | 6 | 2016      | 146.6666667 | 1869.333333 | 3.589825347 | 3.990416427 | Higher in Normal | 2130   | 3465   | 1098   | 1371   | 187    | 17   | 212    | 15    | 382   | 67     |
| ENSMUSG000000029534.17 | Sf7       | 7.97E-07 | 3.06E-05 | 4 | 6 | 578       | 16948.33333 | 16370.33333 | 4.043176954 | 4.713409054 | Higher in TRIM24 | 1557   | 269    | 742    | 944    | 38992  | 515  | 10298  | 5686  | 578   | 45621  |
| ENSMUSG000000074207.10 | Adh1      | 7.97E-07 | 3.06E-05 | 4 | 6 | 1154.25   | 73.33333333 | 1080.916667 | 3.812336514 | 4.307646859 | Higher in Normal | 3599   | 2679   | 135    | 244    | 37     | 29   | 59     | 25    | 242   | 48     |
| ENSMUSG00000029082.17  | Bst1      | 8.11E-07 | 3.10E-05 | 4 | 6 | 221.75    | 1581.666667 | 1359.416667 | 2.750281919 | 2.919596708 | Higher in TRIM24 | 90     | 110    | 314    | 373    | 2910   | 322  | 1205   | 1184  | 2595  | 1271   |
| ENSMUSG000000028641.16 | P3h1      | 8.21E-07 | 3.14E-05 | 4 | 6 | 606.25    | 3617.333333 | 3011.083333 | 2.429830333 | 2.543037666 | Higher in TRIM24 | 586    | 545    | 630    | 674    | 1129   | 1510 | 5134   | 5663  | 1913  | 6355   |
| ENSMUSG00000014846.12  | Ptpp3     | 8.22E-07 | 3.14E-05 | 4 | 6 | 3010      | 479.6666667 | 2530.333333 | 2.468602055 | 2.58851239  | Higher in Normal | 1316   | 1917   | 3508   | 5299   | 197    | 263  | 1014   | 337   | 643   | 424    |
| ENSMUSG000000036596.4  | Ccp2      | 8.53E-07 | 3.25E-05 | 4 | 6 | 31.75     | 415         | 383.25      | 3.375036759 | 3.717692276 | Higher in TRIM24 | 23     | 21     | 44     | 39     | 62     | 110  | 1291   | 184   | 624   | 219    |
| ENSMUSG00000009376.15  | Met       | 8.63E-07 | 3.28E-05 | 4 | 6 | 6114.5    | 162810.6667 | 156966.1667 | 3.913271767 | 4.507021964 | Higher in TRIM24 | 4138   | 3937   | 8468   | 7915   | 287283 | 4478 | 186147 | 45194 | 6439  | 447323 |
| ENSMUSG000000028341.9  | Nr4a3     | 8.64E-07 | 3.28E-05 | 4 | 6 | 6425      | 165.8333333 | 6259.166667 | 4.35323721  | 5.17724498  | Higher in Normal | 155    | 46     | 13645  | 11856  | 46     | 94   | 371    | 82    | 158   | 244    |
| ENSMUSG000000030144.4  | Clec4d    | 8.81E-07 | 3.35E-05 | 4 | 6 | 128       | 1285.666667 | 1157.666667 | 2.836067668 | 3.024970988 | Higher in TRIM24 | 69     | 66     | 160    | 217    | 158    | 372  | 1878   | 394   | 1157  | 3755   |
| ENSMUSG000000025175.12 | Fn3k      | 8.97E-07 | 3.40E-05 | 4 | 6 | 194       | 22          | 172         | 3.110677234 | 3.360389628 | Higher in Normal | 383    | 140    | 112    | 16     | 4      | 11   | 8      | 72    | 21    | 8      |
| ENSMUSG000000095335.2  | Igkv3-5   | 9.29E-07 | 3.51E-05 | 4 | 6 | 162.5     | 6.5         | 156         | 4.343686732 | 5.162185165 | Higher in Normal | 11     | 73     | 239    | 327    | 4      | 2    | 0      | 0     | 2     | 31     |
| ENSMUSG000000027333.18 | Smox      | 9.52E-07 | 3.58E-05 | 4 | 6 | 1087.5    | 6491.333333 | 5403.833333 | 2.545854435 | 2.679223941 | Higher in TRIM24 | 475    |        |        |        |        |      |        |       |       |        |



|                       |                |          |          |   |   |          |             |              |              |             |                  |       |       |       |      |      |       |       |       |       |       |
|-----------------------|----------------|----------|----------|---|---|----------|-------------|--------------|--------------|-------------|------------------|-------|-------|-------|------|------|-------|-------|-------|-------|-------|
| ENSMUSG00000034205.16 | LoxI2          | 1.59E-06 | 5.53E-05 | 4 | 6 | 834.5    | 11057.5     | 10223        | 3.137738837  | 3.419825363 | Higher in TRIM24 | 1321  | 1363  | 270   | 384  | 1866 | 4250  | 16483 | 12320 | 4724  | 26702 |
| ENSMUSG00000086555.2  | Gm13446        | 1.61E-06 | 5.60E-05 | 4 | 6 | 23.5     | 2.333333333 | 21.16666667  | 3.104956502  | 3.373953423 | Higher in Normal | 23    | 6     | 34    | 31   | 1    | 1     | 3     | 1     | 5     | 3     |
| ENSMUSG00000029838.11 | Ptn            | 1.63E-06 | 5.67E-05 | 4 | 6 | 13375.75 | 1717.166667 | 11658.58333  | 2.721107774  | 2.828516683 | Higher in Normal | 10106 | 13713 | 12514 | 1152 | 295  | 2084  | 3649  | 1289  | 1834  | 1834  |
| ENSMUSG00000028427.13 | Aqp7           | 1.71E-06 | 5.92E-05 | 4 | 6 | 1990.75  | 96.33333333 | 1894.416667  | 4.194670472  | 4.962818751 | Higher in Normal | 3124  | 3876  | 454   | 509  | 70   | 6     | 12    | 2     | 282   | 206   |
| ENSMUSG00000028024.14 | Enpep          | 1.74E-06 | 5.99E-05 | 4 | 6 | 1165.25  | 132.8333333 | 1032.416667  | 3.130346647  | 3.402094134 | Higher in Normal | 3427  | 601   | 332   | 301  | 78   | 68    | 102   | 51    | 267   | 231   |
| ENSMUSG00000045573.9  | Penk           | 1.74E-06 | 6.00E-05 | 4 | 6 | 1071.75  | 206.6666667 | 865.0833333  | 2.501811336  | 2.632627679 | Higher in Normal | 846   | 1778  | 690   | 973  | 47   | 61    | 326   | 172   | 254   | 380   |
| ENSMUSG00000028399.18 | Ptptrd         | 1.78E-06 | 6.12E-05 | 4 | 6 | 1339.25  | 235         | 1104.25      | 2.698089842  | 2.865223753 | Higher in Normal | 2171  | 2045  | 607   | 534  | 172  | 53    | 261   | 81    | 425   | 418   |
| ENSMUSG00000071036.2  | Gm10309        | 1.82E-06 | 6.24E-05 | 4 | 6 | 42       | 3.166666667 | 38.83333333  | 3.454158643  | 3.841844646 | Higher in Normal | 52    | 7     | 61    | 48   | 0    | 3     | 3     | 0     | 7     | 6     |
| ENSMUSG00000069421.4  | Offr810        | 1.89E-06 | 6.46E-05 | 4 | 6 | 6.5      | 243.8333333 | 237.3333333  | 4.25955039   | 5.213439936 | Higher in TRIM24 | 11    | 14    | 0     | 1    | 8    | 348   | 352   | 370   | 117   | 268   |
| ENSMUSG00000085558.7  | 493041218Rrik  | 1.90E-06 | 6.47E-05 | 4 | 6 | 87.75    | 8           | 79.75        | 3.416811627  | 3.786816199 | Higher in Normal | 147   | 123   | 43    | 38   | 7    | 2     | 5     | 0     | 23    | 11    |
| ENSMUSG00000046341.5  | Gm11223        | 1.90E-06 | 6.47E-05 | 4 | 6 | 22.25    | 161         | 138.75       | 2.707916819  | 2.882684878 | Higher in TRIM24 | 33    | 12    | 19    | 25   | 40   | 89    | 227   | 270   | 83    | 257   |
| ENSMUSG00000031725.8  | Cesif1         | 1.92E-06 | 6.50E-05 | 4 | 6 | 1983.25  | 54.83333333 | 1928.416667  | 4.605594203  | 5.756550502 | Higher in Normal | 3912  | 3938  | 39    | 44   | 32   | 4     | 12    | 3     | 181   | 97    |
| ENSMUSG00000027469.16 | Tpx2           | 1.94E-06 | 6.54E-05 | 4 | 6 | 646      | 3790.166667 | 3144.166667  | 2.381019102  | 2.49562059  | Higher in TRIM24 | 401   | 127   | 979   | 1077 | 3734 | 970   | 3932  | 3106  | 2444  | 8555  |
| ENSMUSG00000102697.7  | Pcdhac2        | 1.96E-06 | 6.61E-05 | 4 | 6 | 56       | 4.5         | 51.5         | 3.393377599  | 3.757605022 | Higher in Normal | 71    | 24    | 86    | 43   | 0    | 1     | 7     | 1     | 14    | 4     |
| ENSMUSG00000109145.1  | Gm20744        | 1.97E-06 | 6.63E-05 | 4 | 6 | 1.25     | 31.33333333 | 30.08333333  | 3.725548613  | 4.294866675 | Higher in TRIM24 | 1     | 1     | 3     | 0    | 21   | 17    | 12    | 3     | 41    | 94    |
| ENSMUSG00000033849.3  | B3galt2        | 1.99E-06 | 6.69E-05 | 4 | 6 | 2124.25  | 76.66666667 | 2047.583333  | 4.269654112  | 5.109760973 | Higher in Normal | 4585  | 3709  | 102   | 101  | 61   | 32    | 76    | 3     | 234   | 54    |
| ENSMUSG00000034842.16 | Art3           | 2.01E-06 | 6.75E-05 | 4 | 6 | 3437.25  | 272.3333333 | 3164.916667  | 3.527248547  | 3.941712728 | Higher in Normal | 7039  | 5866  | 383   | 461  | 325  | 83    | 194   | 125   | 608   | 299   |
| ENSMUSG00000085890.7  | Tnfsf13os      | 2.05E-06 | 6.87E-05 | 4 | 6 | 94.75    | 9.833333333 | 81.91666667  | 2.696657534  | 2.867024835 | Higher in Normal | 51    | 67    | 110   | 151  | 21   | 12    | 4     | 2     | 23    | 15    |
| ENSMUSG00000040986.1  | Kcnd3          | 2.09E-06 | 6.97E-05 | 4 | 6 | 69.25    | 8.333333333 | 295.16666667 | 2.952272163  | 3.178462288 | Higher in Normal | 102   | 31    | 93    | 50   | 4    | 5     | 4     | 0     | 15    | 31    |
| ENSMUSG00000034936.2  | Lrl4d          | 2.10E-06 | 7.00E-05 | 4 | 6 | 2719     | 306         | 2413         | 3.217159541  | 3.520577281 | Higher in Normal | 487   | 483   | 4076  | 5830 | 68   | 52    | 235   | 103   | 262   | 1116  |
| ENSMUSG000000096326.2 | Ighv1-78       | 2.12E-06 | 7.08E-05 | 4 | 6 | 24       | 0.833333333 | 23.16666667  | 4.223625807  | 5.123905432 | Higher in Normal | 33    | 47    | 8     | 8    | 2    | 1     | 0     | 0     | 0     | 2     |
| ENSMUSG00000086712.2  | A4427809       | 2.13E-06 | 7.08E-05 | 4 | 6 | 42       | 270.8333333 | 228.8333333  | 2.345741841  | 2.456463889 | Higher in TRIM24 | 62    | 65    | 22    | 19   | 249  | 148   | 386   | 102   | 265   | 475   |
| ENSMUSG00000044103.4  | Il1f9          | 2.13E-06 | 7.08E-05 | 4 | 6 | 8.25     | 162.5       | 154.25       | 3.615766357  | 4.105539144 | Higher in TRIM24 | 21    | 1     | 4     | 7    | 35   | 39    | 282   | 28    | 418   | 173   |
| ENSMUSG00000040133.2  | Gpr176         | 2.14E-06 | 7.12E-05 | 4 | 6 | 130.5    | 1028.333333 | 897.8333333  | 2.79010199   | 2.910004041 | Higher in TRIM24 | 156   | 73    | 127   | 166  | 121  | 386   | 1861  | 1228  | 657   | 1917  |
| ENSMUSG00000040653.6  | Ppp1r14c       | 2.17E-06 | 7.20E-05 | 4 | 6 | 17.5     | 534.3333333 | 516.8333333  | 3.925497213  | 4.601908608 | Higher in TRIM24 | 9     | 35    | 10    | 16   | 6    | 142   | 1486  | 100   | 520   | 952   |
| ENSMUSG00000082433.2  | Gm9025         | 2.19E-06 | 7.24E-05 | 4 | 6 | 32.25    | 272.6666667 | 240.4166667  | 2.770659929  | 2.961925946 | Higher in TRIM24 | 84    | 14    | 18    | 13   | 147  | 179   | 367   | 264   | 136   | 543   |
| ENSMUSG00000105565.1  | Gm43566        | 2.19E-06 | 7.25E-05 | 4 | 6 | 24       | 183.1666667 | 159.1666667  | 2.696473454  | 2.871323148 | Higher in TRIM24 | 28    | 22    | 22    | 24   | 189  | 18    | 284   | 228   | 105   | 275   |
| ENSMUSG00000037196.6  | Pacrg          | 2.26E-06 | 7.45E-05 | 4 | 6 | 31.5     | 5.666666667 | 25.83333333  | 2.439842946  | 2.564588913 | Higher in Normal | 40    | 14    | 27    | 45   | 1    | 3     | 7     | 5     | 8     | 10    |
| ENSMUSG00000109807.1  | Gm45244        | 2.27E-06 | 7.48E-05 | 4 | 6 | 163      | 13.83333333 | 149.1666667  | 3.609322403  | 4.065743018 | Higher in Normal | 296   | 312   | 15    | 29   | 5    | 4     | 6     | 8     | 24    | 36    |
| ENSMUSG00000091370.1  | 5730435014Rrik | 2.31E-06 | 7.56E-05 | 4 | 6 | 19.25    | 2.666666667 | 16.58333333  | 2.844788204  | 3.050482129 | Higher in Normal | 11    | 20    | 17    | 29   | 3    | 1     | 1     | 1     | 3     | 7     |
| ENSMUSG00000066058.11 | Cldn19         | 2.33E-06 | 7.61E-05 | 4 | 6 | 99.75    | 11          | 88.75        | 3.413373043  | 3.785274138 | Higher in Normal | 87    | 96    | 100   | 116  | 2    | 2     | 0     | 2     | 15    | 45    |
| ENSMUSG00000032796.7  | Lama1          | 2.33E-06 | 7.61E-05 | 4 | 6 | 3145.25  | 296.3333333 | 2848.916667  | 3.002961412  | 3.24663496  | Higher in Normal | 859   | 476   | 636   | 4944 | 512  | 152   | 413   | 95    | 352   | 254   |
| ENSMUSG00000050368.4  | Hoxd10         | 2.35E-06 | 7.66E-05 | 4 | 6 | 185.25   | 22.16666667 | 163.0833333  | 2.874047355  | 3.08535844  | Higher in Normal | 131   | 88    | 218   | 304  | 6    | 8     | 66    | 9     | 12    | 32    |
| ENSMUSG00000021416.11 | Eci3           | 2.35E-06 | 7.66E-05 | 4 | 6 | 297.75   | 27.83333333 | 269.9166667  | 3.258488244  | 3.580149891 | Higher in Normal | 508   | 470   | 819   | 124  | 41   | 3     | 14    | 30    | 56    | 23    |
| ENSMUSG00000035431.4  | Sstr1          | 2.38E-06 | 7.73E-05 | 4 | 6 | 32.5     | 2           | 30.5         | 3.752129174  | 4.284962169 | Higher in Normal | 53    | 11    | 31    | 35   | 1    | 0     | 0     | 0     | 7     | 4     |
| ENSMUSG00000062380.4  | Tubb3          | 2.43E-06 | 7.87E-05 | 4 | 6 | 39.75    | 388         | 348.25       | 2.829222661  | 3.036265532 | Higher in TRIM24 | 74    | 19    | 37    | 29   | 35   | 101   | 453   | 192   | 739   | 758   |
| ENSMUSG00000108236.1  | 0610033M10Rrik | 2.43E-06 | 7.87E-05 | 4 | 6 | 44       | 6.666666667 | 37.33333333  | 2.829508709  | 3.030587323 | Higher in Normal | 47    | 52    | 40    | 37   | 3    | 5     | 2     | 0     | 14    | 16    |
| ENSMUSG00000085881.2  | Gm15912        | 2.45E-06 | 7.93E-05 | 4 | 6 | 50.75    | 6.666666667 | 44.08333333  | 3.009470171  | 3.255830999 | Higher in Normal | 65    | 67    | 28    | 43   | 2    | 0     | 11    | 2     | 12    | 13    |
| ENSMUSG00000027715.9  | Ccna2          | 2.50E-06 | 8.05E-05 | 4 | 6 | 585      | 3292        | 2707         | 2.3957819    | 2.515570611 | Higher in TRIM24 | 337   | 126   | 890   | 987  | 2595 | 909   | 3705  | 3941  | 2325  | 6277  |
| ENSMUSG00000096719.1  | Mrgpra2b       | 2.55E-06 | 8.18E-05 | 4 | 6 | 1        | 26.83333333 | 25.83333333  | 3.918284113  | 4.633559747 | Higher in TRIM24 | 0     | 0     | 2     | 2    | 2    | 3     | 37    | 7     | 60    | 34    |
| ENSMUSG00000054555.11 | Adam12         | 2.56E-06 | 8.21E-05 | 4 | 6 | 492.75   | 3683        | 3190.25      | 2.863900878  | 3.080577358 | Higher in TRIM24 | 664   | 420   | 512   | 375  | 612  | 6872  | 4574  | 3874  | 2836  | 3330  |
| ENSMUSG00000042302.14 | Ehbp1          | 2.60E-06 | 8.29E-05 | 4 | 6 | 4084.5   | 683.5       | 3401         | 2.500530794  | 2.636101378 | Higher in Normal | 928   | 941   | 7572  | 6897 | 355  | 374   | 742   | 392   | 665   | 1573  |
| ENSMUSG00000026042.16 | Col5a2         | 2.62E-06 | 8.36E-05 | 4 | 6 | 3521.75  | 27208       | 23686.25     | 2.730980628  | 2.916049516 | Higher in TRIM24 | 4020  | 4389  | 2721  | 2957 | 5245 | 25966 | 66919 | 13297 | 24292 | 27529 |
| ENSMUSG00000032131.16 | Abcg4          | 2.63E-06 | 8.38E-05 | 4 | 6 | 50       | 10.5        | 39.5         | 2.388200245  | 2.504897645 | Higher in Normal | 84    | 24    | 54    | 38   | 3    | 4     | 13    | 5     | 10    | 28    |
| ENSMUSG00000024883.6  | Rin1           | 2.68E-06 | 8.52E-05 | 4 | 6 | 333      | 1863.666667 | 1530.666667  | 2.558611174  | 2.70807164  | Higher in TRIM24 | 199   | 149   | 477   | 507  | 855  | 3606  | 1731  | 903   | 2099  | 1988  |
| ENSMUSG00000014030.15 | Pax5           | 2.76E-06 | 8.77E-05 | 4 | 6 | 285      | 44.66666667 | 240.3333333  | 2.93224651   | 3.160729043 | Higher in Normal | 193   | 435   | 276   | 236  | 4    | 7     | 53    | 12    | 65    | 127   |
| ENSMUSG00000030050.4  | Gkn1           | 2.79E-06 | 8.84E-05 | 4 | 6 | 1.25     | 24.33333333 | 23.08333333  | 3.654464755  | 4.209599969 | Higher in TRIM24 | 2     | 1     | 0     | 2    | 5    | 9     | 37    | 35    | 16    | 44    |
| ENSMUSG00000032291.8  | Crapb1         | 2.84E-06 | 8.99E-05 | 4 | 6 | 226.75   | 4450.5      | 4223.75      | 3.665727585  | 4.195881716 | Higher in TRIM24 | 142   | 258   | 187   | 320  | 64   | 1748  | 12838 | 3476  | 1186  | 7391  |
| ENSMUSG00000030862.13 | Cpxm2          | 2.93E-06 | 9.24E-05 | 4 | 6 | 505      | 4916.666667 | 4411.666667  | 3.092896797  | 3.378960883 | Higher in TRIM24 | 233   | 236   | 648   | 903  | 580  | 3339  | 14080 | 2085  | 5625  | 3791  |
| ENSMUSG00000021090.16 | Lrr9           | 2.93E-06 | 9.24E-05 | 4 | 6 | 70.75    | 7.666666667 | 63.08333333  | 3.259286563  | 3.584480745 | Higher in Normal | 71    | 28    | 112   | 72   | 2    | 1     | 3     | 0     | 18    | 22    |
| ENSMUSG00000033746.8  | Pthr1          | 2.93E-06 | 9.24E-05 | 4 | 6 | 119.5    | 691.5       | 572          | 2.411232599  | 2.535593046 | Higher in TRIM24 | 119   | 110   | 106   | 143  | 139  | 1047  | 711   | 456   | 519   | 1277  |
| ENSMUSG00000079298.9  | Klrb1b         | 2.96E-06 | 9.30E-05 | 4 | 6 | 46       | 400.1666667 | 354.1666667  | 2.9887156548 | 3.113645374 | Higher in TRIM24 | 44    | 53    | 30    | 57   | 46   | 422   | 912   | 250   | 264   | 507   |
| ENSMUSG00000103254.1  | Ighv1-15       | 3.03E-06 | 9.48E-05 | 4 | 6 | 20.75    | 13.33333333 | 19.41666667  | 3.691908168  | 4.233850164 | Higher in Normal | 6     | 48    | 11    | 18   | 1    | 1     | 1     | 1     | 1     | 3     |
| ENSMUSG00000063018.6  | 2010204K13Rrik | 3.05E-06 | 9.53E-05 | 4 | 6 | 74.75    | 454.1666667 | 379.4166667  | 2.400536588  | 2.523404536 | Higher in TRIM24 | 43    | 35    | 83    | 138  | 560  | 90    | 261   | 493   | 246   | 1075  |
| ENSMUSG0000009356.12  | Lpo            | 3.07E-06 | 9.57E-05 | 4 |   |          |             |              |              |             |                  |       |       |       |      |      |       |       |       |       |       |

|                       |           |          |             |   |   |          |             |              |             |                  |                  |       |       |       |       |      |       |       |       |       |       |
|-----------------------|-----------|----------|-------------|---|---|----------|-------------|--------------|-------------|------------------|------------------|-------|-------|-------|-------|------|-------|-------|-------|-------|-------|
| ENSMUSG00000045569.6  | Mc2r      | 3.99E-06 | 0.00011833  | 4 | 6 | 460.5    | 16.33333333 | 444.1666667  | 4.373262962 | 5.396126244      | Higher in Normal | 827   | 998   | 9     | 8     | 7    | 1     | 6     | 4     | 48    | 32    |
| ENSMUSG00000048087.6  | Gm4737    | 4.00E-06 | 0.00018555  | 4 | 6 | 111      | 1039.5      | 928.5        | 2.692906725 | 2.877580123      | Higher in TRIM24 | 261   | 111   | 28    | 44    | 376  | 496   | 1037  | 693   | 945   | 2690  |
| ENSMUSG00000042256.4  | Ptchd4    | 4.02E-06 | 0.00011888  | 4 | 6 | 113.25   | 15.5        | 97.75        | 3.147993461 | 3.44828639       | Higher in Normal | 152   | 116   | 110   | 75    | 3    | 1     | 2     | 12    | 11    | 64    |
| ENSMUSG00000038216.7  | Pndt      | 4.10E-06 | 0.000120475 | 4 | 6 | 47.25    | 0.66666667  | 46.58333333  | 4.756411631 | 6.321128097      | Higher in Normal | 1     | 4     | 77    | 107   | 0    | 0     | 1     | 0     | 0     | 3     |
| ENSMUSG00000022878.5  | Adipooq   | 4.11E-06 | 0.000120847 | 4 | 6 | 28941.25 | 730.1666667 | 28211.08333  | 4.495079493 | 5.653138052      | Higher in Normal | 55562 | 59374 | 343   | 486   | 887  | 133   | 403   | 42    | 2618  | 298   |
| ENSMUSG00000031775.5  | PlIp      | 4.13E-06 | 0.000121342 | 4 | 6 | 24.75    | 3.66666667  | 21.08333333  | 2.76520741  | 2.965390319      | Higher in Normal | 20    | 39    | 19    | 21    | 1    | 2     | 2     | 3     | 8     | 6     |
| ENSMUSG00000029375.6  | Cxcl15    | 4.15E-06 | 0.000121684 | 4 | 6 | 1297.75  | 60.83333333 | 1236.916667  | 3.761980288 | 4.32939224       | Higher in Normal | 675   | 1272  | 1381  | 1863  | 218  | 10    | 56    | 1     | 54    | 26    |
| ENSMUSG00000024973.16 | HrasL5s   | 4.18E-06 | 0.000122458 | 4 | 6 | 43       | 2.66666667  | 40.33333333  | 3.487354032 | 3.935270823      | Higher in Normal | 34    | 29    | 61    | 48    | 3    | 0     | 1     | 0     | 9     | 0     |
| ENSMUSG00000024892.51 | Pcx       | 4.23E-06 | 0.000123791 | 4 | 6 | 12111.75 | 1252        | 10859.75     | 3.130467229 | 3.428397947      | Higher in Normal | 29540 | 8909  | 4740  | 5258  | 1327 | 195   | 769   | 847   | 3628  | 746   |
| ENSMUSG00000103768.1  | Gm37856   | 4.30E-06 | 0.000125532 | 4 | 6 | 20       | 0.5         | 19.5         | 4.430844707 | 5.570871323      | Higher in Normal | 35    | 35    | 2     | 8     | 0    | 0     | 1     | 0     | 1     | 1     |
| ENSMUSG00000042401.6  | Crtc1     | 4.31E-06 | 0.000125741 | 4 | 6 | 272.25   | 15.5        | 256.75       | 4.006116267 | 4.729920269      | Higher in Normal | 314   | 752   | 16    | 7     | 12   | 2     | 12    | 5     | 21    | 41    |
| ENSMUSG0000005087.17  | Cd44      | 4.35E-06 | 0.000126585 | 4 | 6 | 4551     | 25820.83333 | 21269.83333  | 2.479871806 | 2.621527583      | Higher in TRIM24 | 1294  | 1973  | 7574  | 7363  | 9924 | 34916 | 31897 | 11971 | 27197 | 39020 |
| ENSMUSG00000025746.11 | Il6       | 4.45E-06 | 0.000128871 | 4 | 6 | 3301.75  | 97.33333333 | 3204.416667  | 4.165224442 | 5.011728694      | Higher in Normal | 47    | 9     | 6063  | 7088  | 37   | 62    | 61    | 102   | 125   | 197   |
| ENSMUSG00000047298.3  | Kcmv2     | 4.49E-06 | 0.000129819 | 4 | 6 | 24       | 1.66666667  | 22.33333333  | 3.590713773 | 4.087582433      | Higher in Normal | 40    | 9     | 39    | 8     | 2    | 1     | 0     | 0     | 2     | 5     |
| ENSMUSG00000028539.14 | Artn      | 4.53E-06 | 0.000131057 | 4 | 6 | 24       | 53.25       | 508.5        | 3.531187719 | 4.01863266       | Higher in TRIM24 | 17    | 14    | 37    | 28    | 15   | 19    | 595   | 313   | 327   | 1926  |
| ENSMUSG00000086604.2  | Gm15510   | 4.55E-06 | 0.000131512 | 4 | 6 | 35.25    | 5.33333333  | 29.91666667  | 2.840719348 | 3.05900919       | Higher in Normal | 19    | 68    | 16    | 38    | 3    | 1     | 4     | 4     | 7     | 13    |
| ENSMUSG00000041523.3  | Upk2      | 4.59E-06 | 0.000132314 | 4 | 6 | 54.75    | 8.33333333  | 46.41666667  | 2.577053465 | 2.736591667      | Higher in Normal | 45    | 52    | 55    | 67    | 9    | 2     | 21    | 3     | 9     | 6     |
| ENSMUSG00000079092.4  | Pr12c2    | 4.63E-06 | 0.000133223 | 4 | 6 | 11.5     | 891.1666667 | 879.6666667  | 4.398037602 | 5.675231828      | Higher in TRIM24 | 38    | 3     | 3     | 2     | 287  | 13    | 236   | 8     | 2418  | 2385  |
| ENSMUSG00000035184.15 | Fam124a   | 4.67E-06 | 0.000133879 | 4 | 6 | 309      | 39.5        | 269.5        | 2.922714892 | 3.16245283       | Higher in Normal | 277   | 659   | 122   | 178   | 18   | 8     | 64    | 42    | 72    | 33    |
| ENSMUSG00000045281.5  | Gpr20     | 4.68E-06 | 0.000134018 | 4 | 6 | 90       | 5.66666667  | 84.33333333  | 3.425028162 | 3.843065287      | Higher in Normal | 10    | 29    | 150   | 171   | 3    | 2     | 11    | 9     | 1     | 8     |
| ENSMUSG00000047443.14 | Erfe      | 4.77E-06 | 0.000136193 | 4 | 6 | 67.75    | 782.6666667 | 714.9166667  | 3.203621623 | 3.545743752      | Higher in TRIM24 | 56    | 7     | 99    | 109   | 134  | 436   | 829   | 1214  | 144   | 1939  |
| ENSMUSG00000028681.11 | Ptch2     | 4.78E-06 | 0.000136193 | 4 | 6 | 485.25   | 59          | 426.25       | 3.039180926 | 3.312745946      | Higher in Normal | 805   | 924   | 121   | 91    | 58   | 30    | 56    | 22    | 117   | 71    |
| ENSMUSG00000023945.6  | Slc5a7    | 4.78E-06 | 0.000136193 | 4 | 6 | 627.75   | 28.33333333 | 599.4166667  | 4.092925946 | 4.88879238       | Higher in Normal | 102   | 529   | 1066  | 814   | 4    | 2     | 4     | 0     | 99    | 61    |
| ENSMUSG00000041624.10 | Gucy1a2   | 4.80E-06 | 0.000136615 | 4 | 6 | 186      | 32.5        | 153.5        | 2.495927926 | 2.638859553      | Higher in Normal | 120   | 52    | 359   | 213   | 15   | 8     | 26    | 14    | 80    | 52    |
| ENSMUSG00000049988.4  | Lrrc25    | 4.81E-06 | 0.00013682  | 4 | 6 | 179      | 1063.5      | 884.5        | 2.326515643 | 2.442926089      | Higher in TRIM24 | 159   | 331   | 94    | 132   | 484  | 698   | 1614  | 1198  | 797   | 1590  |
| ENSMUSG00000026818.5  | Cel       | 4.83E-06 | 0.000137072 | 4 | 6 | 2090.75  | 69.16666667 | 2021.5833333 | 4.114206747 | 4.928718982      | Higher in Normal | 1120  | 42    | 3109  | 4092  | 22   | 24    | 29    | 5     | 324   | 11    |
| ENSMUSG00000032122.15 | Slc37a2   | 4.83E-06 | 0.000137072 | 4 | 6 | 284      | 1918        | 1634         | 2.346484644 | 2.466146534      | Higher in TRIM24 | 276   | 437   | 209   | 214   | 812  | 807   | 1373  | 2389  | 739   | 5388  |
| ENSMUSG00000052749.9  | Trim30b   | 4.90E-06 | 0.000138622 | 4 | 6 | 19.75    | 133.5       | 113.75       | 2.432327484 | 2.568936957      | Higher in TRIM24 | 23    | 28    | 17    | 11    | 141  | 50    | 82    | 55    | 333   | 140   |
| ENSMUSG00000064080.12 | Fbln2     | 5.14E-06 | 0.000144463 | 4 | 6 | 5929.5   | 37497.83333 | 31568.33333  | 2.51530695  | 2.666321094      | Higher in TRIM24 | 2504  | 3322  | 8555  | 9337  | 8868 | 40972 | 60614 | 19539 | 16503 | 78491 |
| ENSMUSG00000026697.10 | Myoc      | 5.17E-06 | 0.000145144 | 4 | 6 | 37.75    | 4.83333333  | 32.91666667  | 2.935576424 | 3.181454232      | Higher in Normal | 15    | 48    | 45    | 4     | 3    | 0     | 6     | 1     | 12    | 7     |
| ENSMUSG00000031595.9  | Pdgfrr1   | 5.28E-06 | 0.00014804  | 4 | 6 | 304      | 1651.333333 | 1347.333333  | 2.346195956 | 2.466828344      | Higher in TRIM24 | 249   | 183   | 339   | 445   | 486  | 421   | 2590  | 2396  | 2023  | 1992  |
| ENSMUSG00000076646.3  | lghv2-6-8 | 5.30E-06 | 0.000148435 | 4 | 6 | 17.75    | 1           | 16.75        | 3.777948329 | 4.394656333      | Higher in Normal | 22    | 4     | 23    | 22    | 1    | 0     | 1     | 0     | 0     | 4     |
| ENSMUSG00000038418.7  | Egr1      | 5.34E-06 | 0.000149458 | 4 | 6 | 4814.5   | 3821        | 4434.5       | 3.236226538 | 3.578602936      | Higher in Normal | 2709  | 3678  | 89257 | 96938 | 3153 | 1835  | 3802  | 2726  | 5304  | 6106  |
| ENSMUSG00000072849.0  | Serpina1e | 5.38E-06 | 0.000150253 | 4 | 6 | 21       | 0.83333333  | 20.16666667  | 3.984374344 | 4.772010118      | Higher in Normal | 37    | 12    | 15    | 20    | 0    | 0     | 1     | 0     | 4     | 0     |
| ENSMUSG00000040794.5  | C1qtnf4   | 5.38E-06 | 0.000150253 | 4 | 6 | 125.5    | 20          | 105.5        | 2.546393785 | 2.701656978      | Higher in Normal | 83    | 162   | 88    | 169   | 7    | 5     | 38    | 22    | 32    | 16    |
| ENSMUSG00000070419.13 | Cyp3a57   | 5.50E-06 | 0.000152958 | 4 | 6 | 277.75   | 18.83333333 | 258.9166667  | 3.646166374 | 4.170784913      | Higher in Normal | 267   | 651   | 115   | 78    | 2    | 51    | 8     | 37    | 13    | 13    |
| ENSMUSG00000020787.14 | P2rx1     | 5.51E-06 | 0.000153312 | 4 | 6 | 104.5    | 15.5        | 89           | 2.62185367  | 2.792460235      | Higher in Normal | 56    | 72    | 131   | 159   | 8    | 7     | 23    | 3     | 41    | 11    |
| ENSMUSG00000025006.15 | Sorbs1    | 5.60E-06 | 0.000155339 | 4 | 6 | 2176     | 305.5       | 1870.5       | 2.769094247 | 2.97315788       | Higher in Normal | 3666  | 16370 | 2222  | 1179  | 439  | 103   | 150   | 57    | 828   | 256   |
| ENSMUSG00000047261.9  | Gap43     | 5.62E-06 | 0.000155869 | 4 | 6 | 27.5     | 1978.333333 | 1950.833333  | 4.29083409  | 5.450726279      | Higher in TRIM24 | 69    | 26    | 10    | 5     | 8    | 21    | 2014  | 970   | 614   | 8243  |
| ENSMUSG00000112163.1  | Gm8188    | 5.68E-06 | 0.00015739  | 4 | 6 | 2.5      | 23.83333333 | 21.33333333  | 2.844601257 | 3.081695522      | Higher in TRIM24 | 4     | 2     | 3     | 1     | 14   | 24    | 22    | 6     | 21    | 56    |
| ENSMUSG00000062629.7  | Atp6v1b1  | 5.89E-06 | 0.000162463 | 4 | 6 | 12009.75 | 511.1666667 | 11498.58333  | 3.971965811 | 4.699787195      | Higher in Normal | 3875  | 6698  | 16599 | 20867 | 253  | 34    | 146   | 14    | 2481  | 139   |
| ENSMUSG00000048376.6  | F2r       | 5.90E-06 | 0.000162525 | 4 | 6 | 788.25   | 4959.5      | 4171.25      | 2.351018012 | 2.473847212      | Higher in TRIM24 | 424   | 324   | 1141  | 1264  | 2331 | 2031  | 6838  | 2911  | 1297  | 14349 |
| ENSMUSG00000022385.10 | Gtse1     | 5.99E-06 | 0.000164639 | 4 | 6 | 189      | 1043        | 854          | 2.495196893 | 2.644611693      | Higher in TRIM24 | 86    | 50    | 296   | 324   | 2184 | 724   | 865   | 636   | 666   | 1183  |
| ENSMUSG00000056596.8  | Trnp1     | 6.05E-06 | 0.000166242 | 4 | 6 | 408.75   | 42          | 366.75       | 3.261042827 | Higher in Normal | 87               | 206   | 547   | 795   | 45    | 11   | 34    | 14    | 128   | 20    |       |
| ENSMUSG00000019899.16 | Lama2     | 6.74E-06 | 0.000182648 | 4 | 6 | 2095     | 358.5       | 1736.5       | 2.340890573 | 2.461709469      | Higher in Normal | 1528  | 953   | 3527  | 2373  | 119  | 367   | 705   | 136   | 463   | 361   |
| ENSMUSG00000092164.2  | Rergl1    | 6.82E-06 | 0.000184514 | 4 | 6 | 17.25    | 1           | 16.25        | 3.877001442 | 4.560703862      | Higher in Normal | 16    | 17    | 10    | 26    | 0    | 0     | 0     | 0     | 1     | 5     |
| ENSMUSG00000026692.12 | Fmo4      | 6.91E-06 | 0.00018656  | 4 | 6 | 43.5     | 5.16666667  | 38.33333333  | 3.126113049 | 3.440255401      | Higher in Normal | 71    | 46    | 26    | 31    | 0    | 4     | 4     | 0     | 9     | 14    |
| ENSMUSG00000021238.11 | Aldh6a1   | 7.15E-06 | 0.000192111 | 4 | 6 | 6957     | 1017.5      | 5939.5       | 2.851410461 | 3.082262065      | Higher in Normal | 11734 | 12379 | 1851  | 1864  | 1088 | 383   | 642   | 408   | 2174  | 1410  |
| ENSMUSG00000030607.7  | Acan      | 7.29E-06 | 0.000195191 | 4 | 6 | 14.25    | 636.666667  | 622.4166667  | 4.32444979  | 5.596093215      | Higher in TRIM24 | 27    | 13    | 13    | 4     | 0    | 375   | 256   | 2099  | 204   | 886   |
| ENSMUSG00000039628.8  | Hs3st6    | 7.43E-06 | 0.000198721 | 4 | 6 | 142.75   | 12.83333333 | 129.9166667  | 3.159761252 | 3.489166527      | Higher in Normal | 89    | 179   | 117   | 186   | 6    | 1     | 36    | 10    | 21    | 3     |
| ENSMUSG00000094230.5  | Gm12847   | 7.44E-06 | 0.00019878  | 4 | 6 | 13.5     | 0.33333333  | 13.16666667  | 4.329078126 | 5.362457642      | Higher in Normal | 24    | 9     | 15    | 6     | 0    | 0     | 0     | 0     | 0     | 2     |
| ENSMUSG000000090582.1 | Gm17024   | 7.65E-06 | 0.00020391  | 4 | 6 | 773      | 41.33333333 | 731.6666667  | 3.793640747 | 4.426197535      | Higher in Normal | 50    | 17    | 1958  | 1067  | 31   | 21    | 9     | 4     | 59    | 124   |
| ENSMUSG00000020916.8  | Krt36     | 7.71E-06 | 0.000205262 | 4 | 6 | 36       | 1.66666667  | 34.33333333  | 3.993761306 | 4.793755296      | Higher in Normal | 48    | 69    | 15    | 12    | 0    | 1     | 0     | 0     | 7     | 2     |
| ENSMUSG00000038402.2  | Foxf2     | 7.89E-06 | 0.000209512 | 4 | 6 | 13.5     | 434.3333333 | 420.8333333  | 3.920382114 | 4.727429807      | Higher in TRIM24 | 27    | 11    | 13    | 3     | 15   | 13    | 511   | 754   | 66    | 1247  |
| ENSMUSG00000053046.15 | Brsk2     | 7.90E-06 | 0.00020955  | 4 | 6 | 37.25    | 5.5         | 3            |             |                  |                  |       |       |       |       |      |       |       |       |       |       |

|                        |                      |          |             |   |   |          |             |             |             |                  |                  |       |       |      |      |      |      |       |      |      |       |
|------------------------|----------------------|----------|-------------|---|---|----------|-------------|-------------|-------------|------------------|------------------|-------|-------|------|------|------|------|-------|------|------|-------|
| ENSMUSG00000049241.5   | Hcar1                | 1.04E-05 | 0.000264161 | 4 | 6 | 1350     | 60.83333333 | 1289.166667 | 3.992588122 | 4.798892922      | Higher in Normal | 2746  | 2445  | 105  | 104  | 73   | 14   | 22    | 3    | 226  | 27    |
| ENSMUSG00000050671.12  | lsm2                 | 1.04E-05 | 0.000264161 | 4 | 6 | 42.75    | 7.166666667 | 35.58333333 | 2.450534596 | 2.598618507      | Higher in Normal | 43    | 13    | 55   | 60   | 11   | 3    | 5     | 7    | 2    | 15    |
| ENSMUSG00000106619.1   | Gm9353               | 1.07E-05 | 0.000270083 | 4 | 6 | 18       | 0.833333333 | 17.16666667 | 3.900188781 | 4.715478867      | Higher in Normal | 17    | 41    | 10   | 4    | 0    | 1    | 1     | 0    | 2    | 2     |
| ENSMUSG00000050251.5   | Ofrr809              | 1.08E-05 | 0.000272425 | 4 | 6 | 2.75     | 101         | 98.25       | 4.156080802 | 5.303481076      | Higher in TRIM24 | 6     | 4     | 1    | 0    | 1    | 51   | 109   | 323  | 43   | 79    |
| ENSMUSG00000050587.4   | Lrrc4c               | 1.09E-05 | 0.000274    | 4 | 6 | 268      | 64          | 204         | 2.509074513 | 2.509074277      | Higher in Normal | 338   | 202   | 246  | 286  | 13   | 11   | 68    | 14   | 84   | 194   |
| ENSMUSG00000022416.5   | Caana1i              | 1.11E-05 | 0.000278479 | 4 | 6 | 54.75    | 9.5         | 45.25       | 2.728120841 | 2.936825349      | Higher in Normal | 96    | 53    | 54   | 16   | 2    | 5    | 7     | 2    | 12   | 29    |
| ENSMUSG00000026099.6   | 2010300C02Rik        | 1.12E-05 | 0.000281661 | 4 | 6 | 1803     | 197.5       | 1605.5      | 2.907380651 | 3.166646458      | Higher in Normal | 702   | 580   | 2872 | 3058 | 169  | 57   | 125   | 74   | 684  | 76    |
| ENSMUSG00000102778.1   | Gm38165              | 1.13E-05 | 0.000283358 | 4 | 6 | 14.5     | 0.666666667 | 13.83333333 | 3.979169821 | 4.792677566      | Higher in Normal | 27    | 13    | 7    | 11   | 0    | 0    | 1     | 0    | 0    | 3     |
| ENSMUSG00000030278.11  | Cidcc                | 1.14E-05 | 0.000285103 | 4 | 6 | 1737.25  | 597.5       | 17139.75    | 4.202307995 | 5.214503938      | Higher in Normal | 28867 | 41174 | 414  | 494  | 947  | 132  | 243   | 35   | 2010 | 218   |
| ENSMUSG00000027408.7   | Cpxm1                | 1.16E-05 | 0.00028897  | 4 | 6 | 1045.25  | 10330.16667 | 9284.916667 | 2.94819516  | 3.231587937      | Higher in TRIM24 | 803   | 1177  | 904  | 1297 | 584  | 4631 | 30006 | 6267 | 8318 | 12175 |
| ENSMUSG00000045441.5   | Gprin3               | 1.16E-05 | 0.000289697 | 4 | 6 | 410      | 91.66666667 | 318.3333333 | 2.355296029 | 2.485583814      | Higher in Normal | 393   | 1773  | 763  | 311  | 76   | 8    | 47    | 40   | 111  | 268   |
| ENSMUSG00000094690.1   | 1600014C23Rik        | 1.18E-05 | 0.000293554 | 4 | 6 | 0        | 16.16666667 | 16.16666667 | 4.587816193 | 6.146380627      | Higher in TRIM24 | 0     | 0     | 0    | 0    | 3    | 4    | 2     | 18   | 25   | 45    |
| ENSMUSG000000039720.7  | Got11i               | 1.19E-05 | 0.000296842 | 4 | 6 | 38.5     | 4.166666667 | 34.33333333 | 3.158614798 | 3.506572603      | Higher in Normal | 72    | 36    | 26   | 20   | 4    | 1    | 1     | 0    | 12   | 7     |
| ENSMUSG00000031283.16  | Chrd1i               | 1.20E-05 | 0.000297518 | 4 | 6 | 1785.25  | 118.6666667 | 1666.583333 | 3.553457328 | 4.079921356      | Higher in Normal | 2255  | 4342  | 277  | 267  | 20   | 22   | 200   | 227  | 136  | 107   |
| ENSMUSG000000036661.5  | Krt73                | 1.21E-05 | 0.000300407 | 4 | 6 | 64       | 3           | 61          | 3.973050874 | 4.781869629      | Higher in Normal | 7     | 5     | 93   | 151  | 0    | 0    | 1     | 1    | 4    | 12    |
| ENSMUSG000000032281.11 | Acsbg1               | 1.21E-05 | 0.000300407 | 4 | 6 | 300.25   | 3136.5      | 2836.25     | 3.281440466 | 3.700789173      | Higher in TRIM24 | 201   | 212   | 364  | 424  | 252  | 8719 | 4670  | 878  | 2092 | 2208  |
| ENSMUSG00000025414.13  | Tnnt2                | 1.21E-05 | 0.000300856 | 4 | 6 | 134.75   | 1348.166667 | 1213.416667 | 3.287660718 | 3.71032479       | Higher in TRIM24 | 186   | 130   | 110  | 113  | 694  | 4640 | 1032  | 770  | 582  | 371   |
| ENSMUSG00000084960.1   | 8430010I23Rik        | 1.22E-05 | 0.000310178 | 4 | 6 | 114.5    | 18.83333333 | 98.66666667 | 2.946522347 | 3.220669211      | Higher in Normal | 152   | 174   | 88   | 44   | 19   | 7    | 1     | 3    | 29   | 36    |
| ENSMUSG00000036598.4   | Ccdc113              | 1.22E-05 | 0.000311242 | 4 | 6 | 40.75    | 4           | 36.75       | 3.325049071 | 3.736224668      | Higher in Normal | 39    | 18    | 32   | 74   | 1    | 0    | 0     | 1    | 9    | 13    |
| ENSMUSG00000024846.5   | Cst6                 | 1.23E-05 | 0.000304046 | 4 | 6 | 60.25    | 1325.166667 | 1264.916667 | 3.615635157 | 4.227839737      | Higher in TRIM24 | 132   | 49    | 29   | 31   | 257  | 567  | 215   | 285  | 6305 | 322   |
| ENSMUSG00000044678.11  | Ly6k                 | 1.24E-05 | 0.000306576 | 4 | 6 | 64.25    | 12          | 52.25       | 2.435951546 | 2.582783963      | Higher in Normal | 30    | 71    | 46   | 110  | 18   | 2    | 4     | 7    | 19   | 22    |
| ENSMUSG00000046844.6   | Vat1l                | 1.25E-05 | 0.000306897 | 4 | 6 | 211      | 23.16666667 | 187.8333333 | 2.998729762 | 3.290780915      | Higher in Normal | 318   | 207   | 155  | 164  | 27   | 12   | 9     | 4    | 80   | 7     |
| ENSMUSG00000030000.10  | Add2                 | 1.25E-05 | 0.000306917 | 4 | 6 | 44       | 893.1666667 | 849.1666667 | 3.744678005 | 4.453762688      | Higher in TRIM24 | 125   | 20    | 24   | 7    | 36   | 2502 | 472   | 297  | 631  | 1421  |
| ENSMUSG00000097754.1   | Ptgs2o52             | 1.28E-05 | 0.000313288 | 4 | 6 | 8        | 171.3333333 | 163.3333333 | 3.365667973 | 3.832103221      | Higher in TRIM24 | 11    | 2     | 3    | 16   | 7    | 40   | 47    | 52   | 160  | 722   |
| ENSMUSG00000031132.1   | Cd40lg               | 1.32E-05 | 0.000322086 | 4 | 6 | 23       | 2.833333333 | 20.16666667 | 2.887647817 | 3.146825217      | Higher in Normal | 12    | 9     | 23   | 48   | 2    | 0    | 3     | 1    | 5    | 6     |
| ENSMUSG00000082226.3   | Gm175                | 1.33E-05 | 0.000324306 | 4 | 6 | 16.25    | 2.5         | 13.75       | 2.570084663 | 2.750812269      | Higher in Normal | 17    | 3     | 1    | 4    | 1    | 4    | 1     | 3    | 3    | 3     |
| ENSMUSG00000042429.8   | Adora1               | 1.33E-05 | 0.000324832 | 4 | 6 | 1234.5   | 106.1666667 | 1128.333333 | 3.281535691 | 3.682689311      | Higher in Normal | 1955  | 1634  | 660  | 689  | 257  | 11   | 16    | 38   | 247  | 68    |
| ENSMUSG00000071104.10  | Cdc110               | 1.36E-05 | 0.000330187 | 4 | 6 | 45.75    | 5.833333333 | 39.91666667 | 2.986409954 | 3.27462673       | Higher in Normal | 44    | 13    | 71   | 55   | 2    | 3    | 1     | 0    | 11   | 18    |
| ENSMUSG00000097440.1   | Gm6277               | 1.37E-05 | 0.000333221 | 4 | 6 | 55       | 9.333333333 | 45.66666667 | 2.593093841 | 2.775098248      | Higher in Normal | 106   | 50    | 28   | 36   | 6    | 2    | 13    | 3    | 20   | 12    |
| ENSMUSG000000907814.5  | Panct2               | 1.39E-05 | 0.000337366 | 4 | 6 | 55.5     | 8.833333333 | 46.66666667 | 2.67182429  | 2.873389346      | Higher in Normal | 71    | 61    | 54   | 36   | 11   | 3    | 0     | 5    | 18   | 16    |
| ENSMUSG00000045349.15  | Sh2d5                | 1.41E-05 | 0.000341721 | 4 | 6 | 183.5    | 2142.666667 | 1959.166667 | 3.242972432 | 3.652599057      | Higher in TRIM24 | 144   | 11    | 309  | 270  | 1116 | 2913 | 395   | 444  | 5893 | 2095  |
| ENSMUSG00000100371.1   | ENSMUSG00000100371.1 | 1.42E-05 | 0.000343382 | 4 | 6 | 54.25    | 1.5         | 52.75       | 4.263372439 | 5.441077489      | Higher in Normal | 116   | 95    | 4    | 2    | 2    | 1    | 0     | 0    | 5    | 1     |
| ENSMUSG00000021414.7   | Fam217a              | 1.44E-05 | 0.000348035 | 4 | 6 | 77.5     | 12.33333333 | 65.16666667 | 2.854108274 | 3.104362605      | Higher in Normal | 129   | 112   | 33   | 36   | 4    | 2    | 15    | 2    | 21   | 30    |
| ENSMUSG00000063193.8   | Cd300b               | 1.47E-05 | 0.000354253 | 4 | 6 | 107      | 747.1666667 | 640.1666667 | 2.462604992 | 2.621067764      | Higher in TRIM24 | 168   | 160   | 55   | 45   | 233  | 617  | 1350  | 474  | 480  | 1329  |
| ENSMUSG00000094420.2   | Igkv10-96            | 1.48E-05 | 0.000355134 | 4 | 6 | 294.25   | 37          | 257.25      | 2.923291516 | 3.196259366      | Higher in Normal | 77    | 37    | 294  | 431  | 75   | 3    | 32    | 5    | 34   | 73    |
| ENSMUSG00000022044.13  | Stmn4                | 1.48E-05 | 0.000355237 | 4 | 6 | 18       | 478.1666667 | 460.1666667 | 3.961061211 | 4.898337543      | Higher in TRIM24 | 8     | 275   | 194  | 24   | 5    | 170  | 1515  | 1012 | 88   | 79    |
| ENSMUSG00000024675.19  | Ms4a4c               | 1.49E-05 | 0.000365646 | 4 | 6 | 88.25    | 647.3333333 | 559.0833333 | 2.616868719 | 2.811319724      | Higher in TRIM24 | 69    | 185   | 44   | 55   | 789  | 355  | 229   | 1117 | 610  | 784   |
| ENSMUSG00000026676.7   | Ccdc3                | 1.50E-05 | 0.000368964 | 4 | 6 | 199.75   | 19.66666667 | 180.0833893 | 3.193891116 | 3.564773122      | Higher in Normal | 423   | 228   | 92   | 56   | 11   | 3    | 37    | 4    | 52   | 11    |
| ENSMUSG0000001604.14   | Creea3               | 1.54E-05 | 0.000367407 | 4 | 6 | 289.75   | 57.33333333 | 232.4166667 | 2.350562997 | 2.484496058      | Higher in Normal | 176   | 355   | 269  | 359  | 14   | 11   | 79    | 51   | 121  | 68    |
| ENSMUSG00000024041.8   | Cryaa                | 1.56E-05 | 0.000370413 | 4 | 6 | 2.25     | 115.6666667 | 113.4166667 | 4.208272938 | 5.518742363      | Higher in TRIM24 | 0     | 2     | 3    | 4    | 2    | 5    | 24    | 273  | 15   | 375   |
| ENSMUSG00000074264.12  | Amy1                 | 1.56E-05 | 0.000370413 | 4 | 6 | 4665.75  | 201         | 4464.75     | 4.037370893 | 4.935613593      | Higher in Normal | 9922  | 8338  | 210  | 193  | 184  | 24   | 71    | 12   | 784  | 131   |
| ENSMUSG00000020963.15  | Tshr                 | 1.57E-05 | 0.000373098 | 4 | 6 | 1796.25  | 54.83333333 | 1741.416667 | 4.287832192 | 5.462237972      | Higher in Normal | 419   | 2999  | 54   | 13   | 47   | 4    | 13    | 3    | 219  | 43    |
| ENSMUSG00000034570.12  | Inpp5j               | 1.59E-05 | 0.000377933 | 4 | 6 | 215.75   | 37.83333333 | 177.9166667 | 2.470948444 | 2.628583006      | Higher in Normal | 114   | 77    | 309  | 363  | 19   | 4    | 51    | 15   | 80   | 58    |
| ENSMUSG00000016498.9   | Pdcd1lg2             | 1.63E-05 | 0.00038449  | 4 | 6 | 28.75    | 178.1666667 | 149.4166667 | 2.430017956 | 2.583531531      | Higher in TRIM24 | 34    | 20    | 24   | 37   | 38   | 157  | 400   | 58   | 150  | 266   |
| ENSMUSG00000024535.15  | Snx24                | 1.63E-05 | 0.00038449  | 4 | 6 | 215.5    | 1376.166667 | 1160.666667 | 2.41267852  | 2.562407913      | Higher in TRIM24 | 215   | 204   | 199  | 244  | 201  | 1281 | 2368  | 881  | 505  | 3021  |
| ENSMUSG00000027762.6   | Sucnr1               | 1.63E-05 | 0.00038449  | 4 | 6 | 474.75   | 8.166666667 | 466.5833333 | 6.355173653 | Higher in Normal | 583              | 1309  | 3     | 4    | 10   | 0    | 2    | 0     | 29   | 8    |       |
| ENSMUSG00000042672.15  | Dcst1                | 1.64E-05 | 0.000386629 | 4 | 6 | 185.25   | 29.5        | 155.75      | 2.838859877 | 3.089555         | Higher in Normal | 241   | 394   | 63   | 43   | 7    | 13   | 28    | 14   | 49   | 66    |
| ENSMUSG00000032181.7   | Scg3                 | 1.66E-05 | 0.000390764 | 4 | 6 | 269.25   | 29.16666667 | 240.0833333 | 3.263365776 | 3.667596259      | Higher in Normal | 407   | 373   | 125  | 172  | 15   | 4    | 21    | 0    | 77   | 58    |
| ENSMUSG00000078452.10  | Rae1td               | 1.67E-05 | 0.000391122 | 4 | 6 | 8.25     | 63.16666667 | 54.91666667 | 2.723105891 | 2.949556793      | Higher in TRIM24 | 12    | 3     | 11   | 7    | 15   | 35   | 79    | 107  | 24   | 119   |
| ENSMUSG00000040552.8   | C3ar1                | 1.71E-05 | 0.00039969  | 4 | 6 | 427.5    | 3706        | 3278.5      | 2.559785236 | 2.743094272      | Higher in TRIM24 | 481   | 930   | 145  | 154  | 3602 | 1807 | 3522  | 2285 | 1507 | 9513  |
| ENSMUSG00000086448.1   | 9330162012Rik        | 1.73E-05 | 0.000404878 | 4 | 6 | 110      | 15.5        | 94.5        | 2.814838667 | 3.060071723      | Higher in Normal | 190   | 76    | 102  | 72   | 20   | 6    | 1     | 3    | 36   | 27    |
| ENSMUSG00000041660.8   | Bbox1                | 1.74E-05 | 0.000405147 | 4 | 6 | 301      | 20.66666667 | 280.3333333 | 3.547272762 | 4.097163634      | Higher in Normal | 66    | 208   | 425  | 505  | 15   | 3    | 3     | 0    | 74   | 29    |
| ENSMUSG00000035407.8   | Kank4                | 1.83E-05 | 0.0004248   | 4 | 6 | 2716.5   | 192.8333333 | 2523.666667 | 3.299958918 | 3.726228403      | Higher in Normal | 1289  | 742   | 4396 | 4439 | 419  | 29   | 138   | 20   | 504  | 47    |
| ENSMUSG00000021033.11  | Gstz1                | 1.85E-05 | 0.000429783 | 4 | 6 | 10700.25 | 1487.333333 | 9212.916667 | 2.942881065 | 3.229838328      | Higher in Normal | 22418 | 17174 | 1373 | 1836 | 1523 | 3528 | 554   | 818  | 764  | 1982  |
| ENSMUSG00000102923     |                      |          |             |   |   |          |             |             |             |                  |                  |       |       |      |      |      |      |       |      |      |       |

|                        |               |          |             |   |   |          |             |             |             |                  |                  |       |       |       |       |      |       |       |       |       |        |        |
|------------------------|---------------|----------|-------------|---|---|----------|-------------|-------------|-------------|------------------|------------------|-------|-------|-------|-------|------|-------|-------|-------|-------|--------|--------|
| ENSMUSG0000023885.8    | Thbs2         | 2.41E-05 | 0.0005311   | 4 | 6 | 2280.25  | 23098.16667 | 20817.91667 | 2.845390284 | 3.12021201       | Higher in TRIM24 | 1917  | 5176  | 1008  | 1020  | 7614 | 18711 | 58397 | 5288  | 17567 | 31012  |        |
| ENSMUSG00000092618.2   | Btnl6         | 2.41E-05 | 0.0005311   | 4 | 6 | 14.5     | 0.33333333  | 14.16666667 | 4.196811205 | 5.337807492      | Higher in Normal | 27    | 1     | 17    | 13    | 0    | 0     | 0     | 0     | 0     | 1      | 1      |
| ENSMUSG00000100209.1   | Gm28793       | 2.43E-05 | 0.000535599 | 4 | 6 | 10       | 0.16666667  | 9.83333333  | 4.187428799 | 5.302593699      | Higher in Normal | 18    | 5     | 12    | 5     | 0    | 0     | 0     | 0     | 0     | 1      | 1      |
| ENSMUSG00000082491.1   | Gm5909        | 2.43E-05 | 0.000535599 | 4 | 6 | 17.5     | 116.333333  | 98.83333333 | 2.398280605 | 2.552809349      | Higher in TRIM24 | 46    | 5     | 9     | 10    | 104  | 45    | 110   | 100   | 78    | 261    | 261    |
| ENSMUSG00000034917.8   | Tj3           | 2.46E-05 | 0.000539997 | 4 | 6 | 4791.25  | 432.833333  | 4358.416667 | 3.132291699 | 3.501236054      | Higher in Normal | 2539  | 1757  | 6722  | 8147  | 570  | 603   | 64    | 124   | 69    | 1590   | 181    |
| ENSMUSG00000085382.1   | Gm13861       | 2.48E-05 | 0.000544984 | 4 | 6 | 11.75    | 1.33333333  | 10.41666667 | 2.966026758 | 3.287462305      | Higher in Normal | 11    | 14    | 9     | 13    | 1    | 1     | 2     | 0     | 2     | 2      | 2      |
| ENSMUSG00000022484.7   | Hmx10         | 2.49E-05 | 0.000546456 | 4 | 6 | 201.25   | 12.83333333 | 188.4166667 | 3.777697755 | 4.518554658      | Higher in Normal | 168   | 503   | 52    | 82    | 26   | 0     | 7     | 0     | 6     | 38     | 38     |
| ENSMUSG00000043463.6   | Rob9b         | 2.51E-05 | 0.000549287 | 4 | 6 | 27       | 4           | 23          | 2.931434787 | 3.220870103      | Higher in Normal | 35    | 21    | 21    | 31    | 0    | 0     | 2     | 2     | 4     | 16     | 16     |
| ENSMUSG00000042988.0   | Natun         | 2.53E-05 | 0.000553586 | 4 | 6 | 11       | 476         | 465         | 4.596459015 | Higher in TRIM24 | 19               | 3     | 13    | 9     | 26    | 10   | 22    | 172   | 117   | 2509  | 2509   |        |
| ENSMUSG00000028111.4   | Ctsk          | 2.55E-05 | 0.000557878 | 4 | 6 | 1017.75  | 12524.33333 | 11506.58333 | 3.031715721 | 3.378802568      | Higher in TRIM24 | 797   | 1978  | 545   | 751   | 679  | 5359  | 10976 | 22399 | 4426  | 31307  | 31307  |
| ENSMUSG00000025509.15  | Pnpla2        | 2.60E-05 | 0.000567245 | 4 | 6 | 25501.25 | 3815.333333 | 21685.91667 | 2.726518591 | 2.958081661      | Higher in Normal | 43147 | 39060 | 8530  | 11268 | 3059 | 1900  | 2724  | 1174  | 11642 | 2393   | 2393   |
| ENSMUSG00000087030.1   | Gm16143       | 2.65E-05 | 0.000577758 | 4 | 6 | 28.75    | 2.33333333  | 26.41666667 | 3.490156644 | 4.046161963      | Higher in Normal | 64    | 21    | 14    | 16    | 4    | 0     | 0     | 0     | 2     | 8      | 8      |
| ENSMUSG00000000126.11  | Wnt9a         | 2.66E-05 | 0.00057962  | 4 | 6 | 120      | 788.5       | 668.5       | 2.388229676 | 2.541905082      | Higher in TRIM24 | 81    | 184   | 112   | 103   | 94   | 784   | 1199  | 402   | 650   | 1602   | 1602   |
| ENSMUSG00000076695.7   | Ighv1-18      | 2.66E-05 | 0.00057962  | 4 | 6 | 116.75   | 2.33333333  | 114.4166667 | 4.376106808 | 5.859391638      | Higher in Normal | 0     | 15    | 214   | 238   | 3    | 0     | 3     | 0     | 0     | 8      | 8      |
| ENSMUSG000000047861.2  | Foxl1         | 2.75E-05 | 0.000594815 | 4 | 6 | 1986.75  | 137.833333  | 1848.916667 | 3.456792089 | 3.990688865      | Higher in Normal | 958   | 1459  | 2437  | 3093  | 101  | 16    | 56    | 4     | 611   | 39     | 39     |
| ENSMUSG00000049556.5   | Lingo1        | 2.80E-05 | 0.000604668 | 4 | 6 | 498.25   | 64.16666667 | 434.0833333 | 2.594290703 | 2.792719787      | Higher in Normal | 92    | 179   | 775   | 947   | 50   | 28    | 110   | 55    | 111   | 31     | 31     |
| ENSMUSG000000031538.6  | Plat          | 2.86E-05 | 0.000616669 | 4 | 6 | 1347.25  | 7173        | 5825.75     | 2.349220063 | 2.495860264      | Higher in TRIM24 | 527   | 665   | 1974  | 2223  | 1837 | 4362  | 15712 | 7015  | 4183  | 9929   | 9929   |
| ENSMUSG00000013584.5   | Aldh1a2       | 2.87E-05 | 0.000617541 | 4 | 6 | 65.75    | 871.833333  | 806.0833333 | 3.146513307 | 3.551765681      | Higher in TRIM24 | 67    | 156   | 14    | 26    | 174  | 578   | 2383  | 334   | 1285  | 477    | 477    |
| ENSMUSG000000038086.6  | Stxb1         | 2.87E-05 | 0.000618594 | 4 | 6 | 307      | 32.83333333 | 274.1666667 | 3.210195231 | 3.621530986      | Higher in Normal | 704   | 395   | 80    | 49    | 21   | 18    | 12    | 2     | 83    | 61     | 61     |
| ENSMUSG000000059632.3  | Krtap8-1      | 2.88E-05 | 0.000618833 | 4 | 6 | 50.25    | 0           | 50.25       | 4.868248895 | 7.907446356      | Higher in Normal | 2     | 0     | 82    | 117   | 0    | 0     | 0     | 0     | 0     | 0      | 0      |
| ENSMUSG000000024972.16 | Lgals12       | 2.90E-05 | 0.000624501 | 4 | 6 | 3279.25  | 142.333333  | 3136.916667 | 3.919670739 | 4.800909508      | Higher in Normal | 6927  | 5626  | 270   | 294   | 318  | 12    | 30    | 5     | 415   | 74     | 74     |
| ENSMUSG000000039168.15 | Dap           | 3.00E-05 | 0.000643113 | 4 | 6 | 3446     | 27234       | 23788       | 2.327740136 | 2.470893029      | Higher in TRIM24 | 2598  | 4088  | 2962  | 4136  | 8043 | 6001  | 18830 | 17591 | 6558  | 106381 | 106381 |
| ENSMUSG000000060594.6  | Layn          | 3.05E-05 | 0.000652678 | 4 | 6 | 160.25   | 1009        | 848.75      | 2.338773544 | 2.484475992      | Higher in TRIM24 | 102   | 100   | 228   | 211   | 106  | 511   | 1293  | 921   | 467   | 2756   | 2756   |
| ENSMUSG000000032718.4  | Mansc1        | 3.06E-05 | 0.000653042 | 4 | 6 | 1915     | 307.833333  | 1607.166667 | 2.413104949 | 2.571211997      | Higher in Normal | 732   | 553   | 2920  | 3455  | 380  | 130   | 304   | 94    | 716   | 223    | 223    |
| ENSMUSG00000021822.2   | Plau          | 3.07E-05 | 0.000653982 | 4 | 6 | 2370.25  | 22396       | 20025.75    | 3.126357325 | 3.525083102      | Higher in TRIM24 | 1886  | 1967  | 2499  | 3129  | 2152 | 69563 | 16996 | 9510  | 7095  | 2960   | 2960   |
| ENSMUSG000000052920.14 | Prkq1         | 3.08E-05 | 0.000656098 | 4 | 6 | 693.25   | 76.16666667 | 617.0833333 | 2.837387648 | 3.108233474      | Higher in Normal | 224   | 55    | 1610  | 884   | 46   | 74    | 100   | 12    | 114   | 111    | 111    |
| ENSMUSG00000022490.6   | Ppp1r1a       | 3.11E-05 | 0.000661542 | 4 | 6 | 983.75   | 70.83333333 | 912.9166667 | 3.457185483 | 4.001557597      | Higher in Normal | 1812  | 1828  | 127   | 168   | 10   | 9     | 209   | 67    | 71    | 59     | 59     |
| ENSMUSG000000076541.3  | Igkv4-79      | 3.12E-05 | 0.000663049 | 4 | 6 | 38.25    | 3.16666667  | 35.08333333 | 3.580656704 | 4.20439668       | Higher in Normal | 9     | 101   | 22    | 1     | 0    | 5     | 0     | 2     | 11    | 11     | 11     |
| ENSMUSG000000092920.1  | Mirt2         | 3.14E-05 | 0.000666309 | 4 | 6 | 2.5      | 44.66666667 | 42.16666667 | 3.291534198 | 3.795604847      | Higher in TRIM24 | 6     | 3     | 0     | 1     | 29   | 4     | 28    | 14    | 120   | 73     | 73     |
| ENSMUSG000000038738.15 | Shank1        | 3.16E-05 | 0.000670451 | 4 | 6 | 237.25   | 48          | 189.25      | 2.409629744 | 2.567400966      | Higher in Normal | 389   | 108   | 290   | 162   | 11   | 10    | 23    | 31    | 122   | 91     | 91     |
| ENSMUSG000000019124.10 | Scrn1         | 3.17E-05 | 0.000671817 | 4 | 6 | 99       | 549.5       | 450.5       | 2.382261629 | 2.538046574      | Higher in TRIM24 | 140   | 108   | 71    | 77    | 497  | 299   | 649   | 1056  | 152   | 644    | 644    |
| ENSMUSG000000058354.6  | Krt6a         | 3.18E-05 | 0.000672632 | 4 | 6 | 34.5     | 6090.666667 | 6056.166667 | 4.544820999 | 7.375960333      | Higher in TRIM24 | 22    | 7     | 45    | 64    | 5303 | 15    | 65    | 7     | 31111 | 43     | 43     |
| ENSMUSG000000049362.6  | Olfr173       | 3.23E-05 | 0.000679721 | 4 | 6 | 16.5     | 2.5         | 14          | 2.684126848 | 2.913976273      | Higher in Normal | 13    | 16    | 21    | 16    | 0    | 1     | 1     | 4     | 2     | 7      | 7      |
| ENSMUSG000000060675.3  | Pla2g16       | 3.24E-05 | 0.0006811   | 4 | 6 | 12145.25 | 2335.833333 | 9809.416667 | 2.430695613 | 2.593739942      | Higher in Normal | 18279 | 23152 | 2905  | 4245  | 2021 | 1262  | 2408  | 1817  | 3494  | 3013   | 3013   |
| ENSMUSG000000083674.3  | Zfp133-ps     | 3.28E-05 | 0.000689802 | 4 | 6 | 40.25    | 8.66666667  | 31.58333333 | 2.3647329   | 2.514791958      | Higher in Normal | 58    | 65    | 16    | 22    | 7    | 3     | 8     | 5     | 11    | 18     | 18     |
| ENSMUSG000000032271.13 | Nnmt          | 3.30E-05 | 0.000693059 | 4 | 6 | 2175.75  | 153.5       | 2022.25     | 3.544517568 | 4.147547352      | Higher in Normal | 2639  | 5883  | 93    | 88    | 47   | 65    | 276   | 96    | 279   | 158    | 158    |
| ENSMUSG00000006204.6   | 5430419D17rik | 3.38E-05 | 0.000708735 | 4 | 6 | 209.25   | 26.83333333 | 182.4166667 | 2.991628037 | 3.319486872      | Higher in Normal | 184   | 210   | 253   | 190   | 3    | 42    | 1     | 59    | 53    | 53     | 53     |
| ENSMUSG000000066682.11 | Prlrb2        | 3.44E-05 | 0.00071722  | 4 | 6 | 46.25    | 302.5       | 256.25      | 2.45017712  | 2.623512382      | Higher in TRIM24 | 46    | 93    | 19    | 27    | 174  | 356   | 545   | 181   | 171   | 388    | 388    |
| ENSMUSG00000109998.1   | Gm5437        | 3.44E-05 | 0.00071722  | 4 | 6 | 29       | 2.5         | 26.5        | 3.168037651 | 3.577330717      | Higher in Normal | 18    | 8     | 57    | 33    | 5    | 0     | 1     | 0     | 6     | 3      | 3      |
| ENSMUSG000000030108.14 | Slc6a13       | 3.44E-05 | 0.00071722  | 4 | 6 | 311.25   | 21          | 290.25      | 3.80743812  | 4.611279586      | Higher in Normal | 557   | 629   | 31    | 28    | 7    | 0     | 17    | 1     | 36    | 65     | 65     |
| ENSMUSG000000043613.8  | Mmp3          | 3.45E-05 | 0.000718674 | 4 | 6 | 1800     | 26365.33333 | 24565.33333 | 2.913369743 | 3.227114394      | Higher in TRIM24 | 2025  | 2286  | 1179  | 1710  | 838  | 4300  | 20676 | 12217 | 12055 | 108106 | 108106 |
| ENSMUSG00000112327.1   | Gm36827       | 3.48E-05 | 0.000723641 | 4 | 6 | 122.75   | 4           | 118.75      | 4.335685047 | 5.815756077      | Higher in Normal | 69    | 417   | 4     | 1     | 1    | 0     | 0     | 1     | 7     | 15     | 15     |
| ENSMUSG00000073460.4   | Pnlcd1        | 3.48E-05 | 0.000723824 | 4 | 6 | 206      | 38.5        | 167.5       | 2.639944619 | 2.855764847      | Higher in Normal | 374   | 324   | 74    | 52    | 23   | 8     | 21    | 19    | 74    | 86     | 86     |
| ENSMUSG000000040289.8  | Hey1          | 3.51E-05 | 0.000728649 | 4 | 6 | 5516.5   | 726.166667  | 4790.333333 | 2.676209989 | 2.902384772      | Higher in Normal | 722   | 2405  | 8868  | 10071 | 238  | 241   | 507   | 695   | 1989  | 687    | 687    |
| ENSMUSG00000006369.14  | Fbln1         | 3.53E-05 | 0.000731669 | 4 | 6 | 609.75   | 4342.333333 | 3732.583333 | 2.556580926 | 2.756487692      | Higher in TRIM24 | 906   | 581   | 409   | 543   | 654  | 1924  | 12341 | 2584  | 4333  | 4218   | 4218   |
| ENSMUSG000000019278.5  | Dpep1         | 3.59E-05 | 0.000742937 | 4 | 6 | 2071.5   | 415.5       | 1656        | 2.379946003 | 2.534164146      | Higher in Normal | 3070  | 2905  | 1032  | 1279  | 97   | 203   | 822   | 170   | 674   | 527    | 527    |
| ENSMUSG00000042763.9   | Maneal        | 3.64E-05 | 0.000751405 | 4 | 6 | 24.75    | 4.5         | 20.25       | 2.453057168 | 2.626112832      | Higher in Normal | 21    | 37    | 18    | 23    | 1    | 1     | 6     | 5     | 8     | 6      | 6      |
| ENSMUSG000000067878.13 | Map7d3        | 3.69E-05 | 0.000758246 | 4 | 6 | 118.75   | 24.66666667 | 94.08333333 | 2.515064241 | 2.70023071       | Higher in Normal | 204   | 177   | 56    | 38    | 10   | 12    | 15    | 6     | 44    | 61     | 61     |
| ENSMUSG00000076598.3   | Igkv3-7       | 3.74E-05 | 0.000766614 | 4 | 6 | 72       | 7           | 65          | 2.922080451 | 3.235321104      | Higher in Normal | 35    | 118   | 51    | 84    | 17   | 10    | 7     | 2     | 4     | 2      | 2      |
| ENSMUSG000000076608.2  | Igkj5         | 3.75E-05 | 0.000766873 | 4 | 6 | 18.25    | 0.83333333  | 17.41666667 | 3.879180945 | 4.800806153      | Higher in Normal | 2     | 29    | 23    | 19    | 0    | 2     | 0     | 0     | 0     | 3      | 3      |
| ENSMUSG00000020423.6   | Btg2          | 3.75E-05 | 0.000767059 | 4 | 6 | 19169.75 | 2340.5      | 16829.25    | 2.629562829 | 2.844744326      | Higher in Normal | 2209  | 2911  | 33037 | 38522 | 2987 | 1921  | 2448  | 1488  | 2382  | 2817   | 2817   |
| ENSMUSG000000033022.7  | Cdo1          | 3.77E-05 | 0.000770544 | 4 | 6 | 17730.75 | 1201        | 16529.75    | 3.5678643   | 4.19899255       | Higher in Normal | 39385 | 24878 | 7338  | 3922  | 1297 | 104   | 438   | 121   | 482   | 440    | 440    |
| ENSMUSG00000048480.5   | Cx            |          |             |   |   |          |             |             |             |                  |                  |       |       |       |       |      |       |       |       |       |        |        |

|                       |               |          |             |   |   |         |             |             |             |             |                  |      |       |       |       |      |      |       |       |       |       |
|-----------------------|---------------|----------|-------------|---|---|---------|-------------|-------------|-------------|-------------|------------------|------|-------|-------|-------|------|------|-------|-------|-------|-------|
| ENSMUSG00000047104.5  | Pbp2          | 4.72E-05 | 0.000929246 | 4 | 6 | 1.5     | 27.16666667 | 25.66666667 | 3.496058893 | 4.189127695 | Higher in TRIM24 | 5    | 0     | 0     | 1     | 6    | 15   | 68    | 20    | 39    | 15    |
| ENSMUSG00000075224.8  | Lrrc55        | 4.74E-05 | 0.000931354 | 4 | 6 | 8.75    | 85.33333333 | 76.58333333 | 3.043252685 | 3.431630548 | Higher in TRIM24 | 18   | 4     | 8     | 5     | 29   | 164  | 100   | 17    | 174   | 28    |
| ENSMUSG00000087054.1  | Gml12405      | 4.82E-05 | 0.000944692 | 4 | 6 | 8       | 0.16666667  | 7.833333333 | 3.935431164 | 4.991234252 | Higher in Normal | 6    | 10    | 8     | 8     | 0    | 0    | 1     | 0     | 0     | 0     |
| ENSMUSG00000029925.13 | Tbas1         | 4.84E-05 | 0.000947618 | 4 | 6 | 192.5   | 1203.833333 | 1011.333333 | 2.355169436 | 2.513567839 | Higher in TRIM24 | 317  | 308   | 74    | 71    | 781  | 1401 | 1601  | 737   | 651   | 2052  |
| ENSMUSG00000055026.13 | Gabrg3        | 4.87E-05 | 0.000952191 | 4 | 6 | 235.5   | 19.5        | 216         | 3.59348304  | 4.267447211 | Higher in Normal | 165  | 203   | 318   | 256   | 2    | 0    | 3     | 0     | 38    | 74    |
| ENSMUSG00000086332.1  | 4930480G23Rik | 4.89E-05 | 0.000954745 | 4 | 6 | 20      | 0.5         | 19.5        | 4.175547573 | 5.520490906 | Higher in Normal | 26   | 42    | 7     | 5     | 0    | 0    | 0     | 0     | 0     | 0     |
| ENSMUSG00000048186.14 | Bend7         | 4.92E-05 | 0.00095907  | 4 | 6 | 541     | 94          | 447         | 2.324229207 | 2.472920959 | Higher in Normal | 333  | 185   | 833   | 813   | 22   | 33   | 101   | 107   | 222   | 79    |
| ENSMUSG0000007107.6   | Atpl1a4       | 5.01E-05 | 0.000973876 | 4 | 6 | 144.25  | 17.5        | 126.75      | 3.039731631 | 3.407374702 | Higher in Normal | 275  | 250   | 34    | 18    | 21   | 2    | 19    | 5     | 29    | 29    |
| ENSMUSG00000022055.7  | Nefl          | 5.03E-05 | 0.000974559 | 4 | 6 | 4       | 90.16666667 | 86.16666667 | 3.479264764 | 4.153770489 | Higher in TRIM24 | 4    | 10    | 2     | 0     | 7    | 56   | 123   | 100   | 9     | 246   |
| ENSMUSG00000076609.2  | Igkc          | 5.03E-05 | 0.000974559 | 4 | 6 | 27146   | 4617.833333 | 22528.16667 | 2.98230498  | 3.325745117 | Higher in Normal | 8056 | 69048 | 12143 | 19337 | 2367 | 806  | 3585  | 559   | 1227  | 19163 |
| ENSMUSG00000047507.12 | Baiap3        | 5.03E-05 | 0.000974559 | 4 | 6 | 108.75  | 22.83333333 | 85.91666667 | 2.446192412 | 2.622104777 | Higher in Normal | 171  | 127   | 75    | 62    | 4    | 3    | 13    | 20    | 43    | 54    |
| ENSMUSG0000006345.10  | Ggt1          | 5.03E-05 | 0.000974607 | 4 | 6 | 1067.5  | 105         | 962.5       | 2.888236521 | 3.19587743  | Higher in Normal | 394  | 315   | 1600  | 1961  | 326  | 12   | 68    | 39    | 101   | 84    |
| ENSMUSG00000097730.3  | Gm26588       | 5.11E-05 | 0.000987493 | 4 | 6 | 74      | 11          | 63          | 2.997119289 | 3.345720678 | Higher in Normal | 128  | 112   | 39    | 17    | 5    | 1    | 2     | 3     | 20    | 35    |
| ENSMUSG00000020893.17 | Per1          | 5.13E-05 | 0.000990496 | 4 | 6 | 8499.5  | 1310.166667 | 7189.333333 | 2.528896003 | 2.725975629 | Higher in Normal | 1141 | 1275  | 16355 | 15227 | 851  | 1084 | 1005  | 569   | 1051  | 3301  |
| ENSMUSG00000031853.5  | Map3k21       | 5.14E-05 | 0.000991241 | 4 | 6 | 1054    | 83          | 971         | 3.281177256 | 3.765392036 | Higher in Normal | 650  | 380   | 1694  | 1492  | 67   | 9    | 28    | 4     | 361   | 29    |
| ENSMUSG00000026837.15 | Col5a1        | 5.17E-05 | 0.000996453 | 4 | 6 | 2792.25 | 24071.83333 | 21279.58333 | 2.729212416 | 2.99305075  | Higher in TRIM24 | 3268 | 4017  | 1973  | 1911  | 1601 | 8007 | 52227 | 32363 | 16941 | 33292 |
| ENSMUSG00000068747.14 | Sort1         | 5.21E-05 | 0.00100314  | 4 | 6 | 6145.25 | 1024.666667 | 5120.833333 | 2.383411855 | 2.545964705 | Higher in Normal | 8026 | 6138  | 5565  | 4852  | 2100 | 404  | 874   | 633   | 1846  | 281   |
| ENSMUSG00000031443.7  | F7            | 5.26E-05 | 0.001011119 | 4 | 6 | 17.25   | 303.3333333 | 286.0833333 | 3.434845916 | 4.066061098 | Higher in TRIM24 | 11   | 45    | 3     | 10    | 145  | 261  | 1182  | 63    | 71    | 98    |
| ENSMUSG00000018211.13 | Wfdcl15b      | 5.28E-05 | 0.001014108 | 4 | 6 | 16      | 0.5         | 15.5        | 3.962882219 | 4.993652412 | Higher in Normal | 13   | 1     | 22    | 28    | 0    | 0    | 0     | 0     | 0     | 1     |
| ENSMUSG00000025329.3  | Padi1         | 5.29E-05 | 0.001014512 | 4 | 6 | 23      | 347.5       | 324.5       | 3.530314794 | 4.236932493 | Higher in TRIM24 | 24   | 27    | 23    | 18    | 56   | 1285 | 49    | 33    | 551   | 111   |
| ENSMUSG00000097522.1  | Gm6634        | 5.29E-05 | 0.001014512 | 4 | 6 | 26.75   | 392.166667  | 365.4166667 | 3.302835159 | 3.840531427 | Higher in TRIM24 | 65   | 27    | 10    | 5     | 20   | 517  | 267   | 676   | 86    | 787   |
| ENSMUSG00000022226.5  | Mcptl2        | 5.33E-05 | 0.001019023 | 4 | 6 | 1.5     | 26          | 24.5        | 3.251749525 | 3.776457155 | Higher in TRIM24 | 2    | 1     | 3     | 0     | 24   | 2    | 30    | 12    | 8     | 80    |
| ENSMUSG00000091212.1  | Krtap11-1     | 5.33E-05 | 0.001019023 | 4 | 6 | 29.5    | 0.16666667  | 29.33333333 | 4.562021154 | 6.677200742 | Higher in Normal | 3    | 0     | 51    | 64    | 0    | 0    | 0     | 0     | 0     | 1     |
| ENSMUSG00000000216.8  | Scnn1g        | 5.38E-05 | 0.001026411 | 4 | 6 | 824.25  | 48.5        | 775.75      | 3.499486419 | 4.110525016 | Higher in Normal | 120  | 122   | 1499  | 1556  | 32   | 11   | 11    | 3     | 218   | 16    |
| ENSMUSG00000033491.13 | Prrs35        | 5.46E-05 | 0.001039152 | 4 | 6 | 31.75   | 690         | 658.25      | 3.657148531 | 4.48558565  | Higher in TRIM24 | 59   | 9     | 32    | 27    | 16   | 50   | 3202  | 394   | 176   | 302   |
| ENSMUSG00000048138.9  | Dmrt2         | 5.48E-05 | 0.001041172 | 4 | 6 | 1078.75 | 46.5        | 1032.25     | 3.874125587 | 4.817152862 | Higher in Normal | 2726 | 1561  | 12    | 16    | 18   | 9    | 92    | 9     | 131   | 20    |
| ENSMUSG00000054409.4  | Tmem74        | 5.48E-05 | 0.001041292 | 4 | 6 | 1.25    | 77.66666667 | 76.41666667 | 4.04045561  | 5.462197444 | Higher in TRIM24 | 1    | 0     | 1     | 3     | 0    | 7    | 121   | 16    | 8     | 314   |
| ENSMUSG00000028359.4  | Orm3          | 5.50E-05 | 0.001043936 | 4 | 6 | 284.5   | 12.66666667 | 271.8333333 | 3.861418477 | 4.795159354 | Higher in Normal | 932  | 188   | 12    | 6     | 18   | 5    | 5     | 0     | 29    | 19    |
| ENSMUSG00000028031.6  | Dkk2          | 5.51E-05 | 0.001045395 | 4 | 6 | 165.5   | 3330        | 3164.5      | 3.408283181 | 4.02082553  | Higher in TRIM24 | 114  | 219   | 151   | 178   | 149  | 393  | 441   | 7032  | 369   | 11596 |
| ENSMUSG00000032334.0  | Loxl1         | 5.54E-05 | 0.001049378 | 4 | 6 | 1352.75 | 11719.66667 | 10366.91667 | 2.774535492 | 3.056903816 | Higher in TRIM24 | 1513 | 1868  | 869   | 1161  | 718  | 5182 | 22298 | 19719 | 5304  | 17097 |
| ENSMUSG00000074771.0  | Ankef1        | 5.58E-05 | 0.001055262 | 4 | 6 | 2248.25 | 81.5        | 2166.75     | 4.045229143 | 5.196632717 | Higher in Normal | 5255 | 3690  | 29    | 19    | 48   | 10   | 23    | 5     | 363   | 40    |
| ENSMUSG00000091568.8  | Gm8206        | 5.60E-05 | 0.001058471 | 4 | 6 | 16.5    | 1.5         | 15          | 3.094644554 | 3.511171184 | Higher in Normal | 8    | 25    | 25    | 0     | 1    | 1    | 3     | 0     | 4     | 4     |
| ENSMUSG00000029603.15 | Dxb1          | 5.63E-05 | 0.001062662 | 4 | 6 | 476     | 66.5        | 409.5       | 2.662755208 | 2.89965819  | Higher in Normal | 213  | 257   | 671   | 763   | 64   | 6    | 89    | 12    | 180   | 48    |
| ENSMUSG00000026834.13 | Acvr1c        | 5.68E-05 | 0.001069735 | 4 | 6 | 1196    | 68          | 1128        | 3.768215551 | 4.611181288 | Higher in Normal | 2034 | 2660  | 52    | 38    | 58   | 14   | 22    | 2     | 230   | 82    |
| ENSMUSG00000031780.2  | Ccl17         | 5.84E-05 | 0.001096135 | 4 | 6 | 22.25   | 342.5       | 320.25      | 3.429397714 | 4.065483755 | Higher in TRIM24 | 8    | 19    | 26    | 36    | 34   | 57   | 1511  | 290   | 52    | 111   |
| ENSMUSG00000093955.2  | Ighv1-34      | 5.87E-05 | 0.001099743 | 4 | 6 | 15.25   | 0.5         | 14.75       | 4.108390157 | 5.326971694 | Higher in Normal | 3    | 42    | 12    | 4     | 0    | 0    | 0     | 0     | 1     | 2     |
| ENSMUSG00000110250.1  | Gm9077        | 5.87E-05 | 0.001100626 | 4 | 6 | 32.5    | 2.66666667  | 29.83333333 | 3.492171931 | 4.112625091 | Higher in Normal | 67   | 7     | 39    | 17    | 0    | 0    | 1     | 0     | 5     | 10    |
| ENSMUSG00000095519.2  | Ighv1-66      | 5.90E-05 | 0.001103295 | 4 | 6 | 36.5    | 3.66666667  | 32.83333333 | 2.873487339 | 3.188960536 | Higher in Normal | 6    | 8     | 65    | 67    | 5    | 2    | 6     | 2     | 3     | 4     |
| ENSMUSG00000094088.2  | Ighv1-64      | 5.93E-05 | 0.001107117 | 4 | 6 | 38.75   | 3.5         | 35.25       | 3.391834788 | 3.948422925 | Higher in Normal | 2    | 40    | 58    | 55    | 2    | 0    | 2     | 0     | 3     | 14    |
| ENSMUSG00000066975.12 | Cryba4        | 5.99E-05 | 0.00111604  | 4 | 6 | 14.5    | 143.3333333 | 128.8333333 | 2.661360016 | 2.903149256 | Higher in TRIM24 | 9    | 17    | 14    | 18    | 23   | 31   | 23    | 83    | 341   | 359   |
| ENSMUSG00000027792.11 | Bche          | 5.99E-05 | 0.001116817 | 4 | 6 | 1680    | 94.83333333 | 1585.166667 | 3.6135745   | 4.330935189 | Higher in Normal | 3715 | 2001  | 539   | 465   | 228  | 6    | 30    | 2     | 272   | 31    |
| ENSMUSG00000041347.5  | Bdkrb1        | 6.04E-05 | 0.00112219  | 4 | 6 | 33.25   | 455.5       | 422.25      | 2.967959936 | 3.332563505 | Higher in TRIM24 | 35   | 10    | 43    | 45    | 11   | 136  | 394   | 252   | 100   | 1840  |
| ENSMUSG00000035112.17 | Wnk4          | 6.04E-05 | 0.00112219  | 4 | 6 | 2431.75 | 157         | 2274.75     | 3.311725688 | 3.825846527 | Higher in Normal | 292  | 169   | 4503  | 4763  | 477  | 19   | 40    | 74    | 89    | 243   |
| ENSMUSG00000001943.8  | Vsig2         | 6.07E-05 | 0.001126242 | 4 | 6 | 287.25  | 45          | 242.25      | 2.622417858 | 2.850336906 | Higher in Normal | 403  | 414   | 163   | 6     | 44   | 46   | 12    | 119   | 43    | 7     |
| ENSMUSG00000044749.13 | Abca6         | 6.11E-05 | 0.001132148 | 4 | 6 | 134     | 22          | 112         | 2.804169939 | 3.08836992  | Higher in Normal | 177  | 98    | 163   | 98    | 2    | 4    | 14    | 1     | 48    | 63    |
| ENSMUSG00000078451.5  | Ppil6         | 6.13E-05 | 0.001134404 | 4 | 6 | 79.5    | 11.83333333 | 67.66666667 | 2.599960955 | 2.821504316 | Higher in Normal | 43   | 36    | 120   | 119   | 9    | 7    | 2     | 2     | 37    | 14    |
| ENSMUSG00000032500.10 | Dclk3         | 6.13E-05 | 0.00113472  | 4 | 6 | 85      | 14.66666667 | 70.83333333 | 2.503062675 | 2.69938105  | Higher in Normal | 87   | 115   | 64    | 74    | 9    | 14   | 26    | 0     | 19    | 17    |
| ENSMUSG00000045875.12 | Adra1a        | 6.17E-05 | 0.001139286 | 4 | 6 | 741     | 60.66666667 | 680.3333333 | 3.380342463 | 3.936830598 | Higher in Normal | 753  | 410   | 1140  | 661   | 31   | 5    | 4     | 1     | 233   | 90    |
| ENSMUSG00000029718.14 | Pcdce         | 6.21E-05 | 0.001143239 | 4 | 6 | 1785.75 | 14586.83333 | 12801.08333 | 2.547758484 | 2.761184644 | Higher in TRIM24 | 2047 | 2352  | 1115  | 1629  | 2651 | 2524 | 11417 | 24725 | 5841  | 40363 |
| ENSMUSG00000060579.12 | Fhit          | 6.30E-05 | 0.001159746 | 4 | 6 | 182.75  | 23.66666667 | 159.0833333 | 2.646057839 | 2.883114088 | Higher in Normal | 196  | 228   | 129   | 178   | 61   | 29   | 7     | 4     | 22    | 19    |
| ENSMUSG0000008163.14  | Gm5431        | 6.42E-05 | 0.001175928 | 4 | 6 | 32      | 223.166667  | 191.166667  | 2.484028685 | 2.681704118 | Higher in TRIM24 | 43   | 57    | 18    | 10    | 432  | 130  | 141   | 84    | 370   | 182   |
| ENSMUSG00000038523.10 | 1700003F12Rik | 6.43E-05 | 0.001175928 | 4 | 6 | 15      | 165         | 150         | 2.919852511 | 3.26881724  | Higher in TRIM24 | 23   | 19    | 8     | 10    | 20   | 24   | 348   | 224   | 50    | 324   |
| ENSMUSG00000041620.8  | Mmp1b         | 6.49E-05 | 0.001184435 | 4 | 6 | 0.25    | 61.66666667 | 61.41666667 | 4.335652275 | 6.95839627  | Higher in TRIM24 | 1    | 0     | 0     | 0     | 0    | 15   | 1     | 8     | 85    | 261   |
| ENSMUSG00000027525.17 | Phactr3       | 6.53E-05 | 0.001190211 | 4 | 6 | 57.75   | 9           | 48.75       | 2.700241494 | 2.952828057 | Higher in Normal | 95   | 12    | 63    | 61    | 4    | 2    | 1     | 4     | 22    | 21    |
| ENSMUSG00000005268.20 | Pfrr          | 6.56E-05 | 0.001194507 | 4 | 6 | 13911.5 | 1079.166667 | 12832.33333 | 3.178910829 | 3.627117467 | Higher in Normal | 5237 | 12522 | 21117 | 16770 | 3360 | 33   | 654</ |       |       |       |

|                        |           |             |             |   |   |          |             |             |             |             |                  |       |       |        |        |       |      |      |      |      |       |
|------------------------|-----------|-------------|-------------|---|---|----------|-------------|-------------|-------------|-------------|------------------|-------|-------|--------|--------|-------|------|------|------|------|-------|
| ENSMUSG0000005580.11   | Adcy9     | 8.11E-05    | 0.001420685 | 4 | 6 | 837.5    | 131.5       | 706         | 2.432090971 | 2.616591052 | Higher in Normal | 214   | 111   | 2056   | 969    | 151   | 90   | 89   | 45   | 215  | 199   |
| ENSMUSG00000046523.4   | Kctd4     | 8.17E-05    | 0.001428936 | 4 | 6 | 796.75   | 148.1666667 | 648.5833333 | 2.708467247 | 2.972771471 | Higher in Normal | 309   | 420   | 1215   | 1243   | 16    | 39   | 92   | 10   | 124  | 608   |
| ENSMUSG00000112433.1   | Gm30122   | 8.18E-05    | 0.001429738 | 4 | 6 | 65.5     | 11.83333333 | 53.66666667 | 2.648318811 | 2.893998365 | Higher in Normal | 106   | 99    | 29     | 28     | 7     | 9    | 3    | 1    | 18   | 33    |
| ENSMUSG00000107451.1   | Gm44421   | 8.24E-05    | 0.00143664  | 4 | 6 | 42.5     | 2.5         | 40          | 3.503739877 | 4.196774176 | Higher in Normal | 118   | 45    | 3      | 4      | 4     | 1    | 4    | 1    | 4    | 1     |
| ENSMUSG00000048572.4   | Tmem252   | 8.29E-05    | 0.001444993 | 4 | 6 | 2292.75  | 360.1666667 | 1932.583333 | 2.439700415 | 2.626659804 | Higher in Normal | 260   | 380   | 3551   | 4980   | 387   | 160  | 337  | 243  | 370  | 664   |
| ENSMUSG00000039099.7   | Wdr93     | 8.35E-05    | 0.001455272 | 4 | 6 | 162.25   | 20          | 142.25      | 3.131331017 | 3.571746109 | Higher in Normal | 364   | 198   | 46     | 41     | 12    | 1    | 2    | 6    | 46   | 53    |
| ENSMUSG00000021567.15  | Nkd2      | 8.53E-05    | 0.001482074 | 4 | 6 | 428.75   | 5166.5      | 4737.75     | 2.243023523 | 3.784203464 | Higher in TRIM24 | 320   | 144   | 548    | 703    | 20050 | 1116 | 1602 | 421  | 6849 | 961   |
| ENSMUSG00000046215.3   | Rprml     | 8.68E-05    | 0.001504289 | 4 | 6 | 127      | 7.833333333 | 119.1666667 | 3.507889258 | 4.196305818 | Higher in Normal | 441   | 59    | 4      | 4      | 6     | 3    | 6    | 11   | 6    | 15    |
| ENSMUSG00000041261.9   | Car8      | 8.69E-05    | 0.001504289 | 4 | 6 | 983.25   | 52.66666667 | 930.5833333 | 3.629787785 | 4.411494352 | Higher in Normal | 243   | 454   | 1641   | 1595   | 9     | 6    | 12   | 0    | 256  | 33    |
| ENSMUSG0000003020.13   | Prickle2  | 8.69E-05    | 0.001504289 | 4 | 6 | 1662     | 265.1666667 | 1396.833333 | 2.391433905 | 2.567644746 | Higher in Normal | 478   | 210   | 3368   | 2592   | 158   | 112  | 214  | 241  | 569  | 297   |
| ENSMUSG00000109282.1   | Gm45188   | 8.78E-05    | 0.001518273 | 4 | 6 | 20.75    | 1.5         | 19.25       | 3.244961284 | 3.786775442 | Higher in Normal | 8     | 26    | 40     | 9      | 1     | 4    | 0    | 0    | 2    | 2     |
| ENSMUSG00000093806.1   | Asmt      | 8.89E-05    | 0.001532764 | 4 | 6 | 10.25    | 0.833333333 | 9.416666667 | 3.241273421 | 3.772875259 | Higher in Normal | 6     | 7     | 17     | 11     | 0     | 0    | 0    | 1    | 2    | 2     |
| ENSMUSG00000030747.5   | Dgat2     | 8.93E-05    | 0.001537528 | 4 | 6 | 20155    | 1648.666667 | 18506.33333 | 3.342721483 | 3.910553779 | Higher in Normal | 52492 | 21451 | 2952   | 3725   | 893   | 399  | 651  | 236  | 7217 | 496   |
| ENSMUSG00000041658.12  | Rragb     | 8.95E-05    | 0.00153883  | 4 | 6 | 138      | 20.66666667 | 117.3333333 | 2.459792226 | 2.654644924 | Higher in Normal | 94    | 72    | 180    | 206    | 2     | 10   | 53   | 19   | 25   | 15    |
| ENSMUSG000000037973.6  | Ccdc129   | 8.98E-05    | 0.001542853 | 4 | 6 | 3685.25  | 208.3333333 | 3476.916667 | 3.537620398 | 4.246230715 | Higher in Normal | 798   | 2023  | 5877   | 6043   | 244   | 8    | 24   | 5    | 886  | 83    |
| ENSMUSG00000058099.15  | Nfam1     | 9.01E-05    | 0.001546472 | 4 | 6 | 225.25   | 1350.666667 | 1125.416667 | 2.329691992 | 2.496099598 | Higher in TRIM24 | 285   | 427   | 92     | 97     | 497   | 1409 | 2312 | 1176 | 1200 | 1510  |
| ENSMUSG00000050101.8   | Shisa3    | 9.12E-05    | 0.001564144 | 4 | 6 | 51.25    | 7.333333333 | 43.91666667 | 2.515645415 | 2.727361899 | Higher in Normal | 7     | 32    | 69     | 97     | 8     | 4    | 13   | 3    | 10   | 6     |
| ENSMUSG00000023034.6   | Nr4a1     | 9.17E-05    | 0.001572071 | 4 | 6 | 27746.25 | 1387        | 26359.25    | 3.48301699  | 4.151717922 | Higher in Normal | 522   | 464   | 50964  | 59035  | 3595  | 438  | 1372 | 300  | 883  | 1734  |
| ENSMUSG00000097214.1   | Gm19791   | 9.25E-05    | 0.001582956 | 4 | 6 | 0.75     | 16.16666667 | 15.41666667 | 3.382274842 | 4.107739845 | Higher in TRIM24 | 1     | 2     | 0      | 0      | 5     | 7    | 23   | 12   | 4    | 46    |
| ENSMUSG00000042707.6   | Dnal1     | 9.32E-05    | 0.001593201 | 4 | 6 | 27.5     | 2.5         | 25          | 3.292654891 | 3.835417262 | Higher in Normal | 73    | 5     | 17     | 15     | 2     | 0    | 1    | 0    | 5    | 7     |
| ENSMUSG00000096858.4   | Ofrr805   | 9.42E-05    | 0.001608017 | 4 | 6 | 7.75     | 383         | 375.25      | 3.90803907  | 5.23068569  | Higher in TRIM24 | 22    | 7     | 2      | 0      | 1     | 174  | 423  | 428  | 9    | 1263  |
| ENSMUSG00000111293.1   | Gm34006   | 9.46E-05    | 0.001613067 | 4 | 6 | 88.75    | 13          | 75.75       | 2.549151029 | 2.770515629 | Higher in Normal | 61    | 78    | 83     | 133    | 26    | 1    | 5    | 9    | 30   | 7     |
| ENSMUSG00000027581.12  | Stmn3     | 9.50E-05    | 0.001618255 | 4 | 6 | 29.75    | 4           | 25.75       | 2.990904257 | 3.371425381 | Higher in Normal | 61    | 24    | 26     | 8      | 0     | 1    | 1    | 2    | 6    | 14    |
| ENSMUSG000000039661.4  | Dusp26    | 9.56E-05    | 0.001626037 | 4 | 6 | 229.25   | 31.66666667 | 197.5833333 | 2.727242506 | 3.15616688  | Higher in Normal | 229   | 372   | 155    | 165    | 87    | 5    | 28   | 3    | 31   | 36    |
| ENSMUSG00000096847.1   | Tmem151b  | 9.63E-05    | 0.001633922 | 4 | 6 | 239.75   | 22.33333333 | 217.4166667 | 2.908036819 | 3.256234199 | Higher in Normal | 99    | 46    | 422    | 392    | 5     | 34   | 43   | 1    | 27   | 24    |
| ENSMUSG000000034486.8  | Gbx2      | 9.74E-05    | 0.001649253 | 4 | 6 | 4.5      | 29.83333333 | 25.33333333 | 2.487285232 | 2.699238182 | Higher in TRIM24 | 5     | 3     | 2      | 8      | 14    | 22   | 29   | 13   | 79   | 22    |
| ENSMUSG000000033350.7  | Chst2     | 9.76E-05    | 0.001652105 | 4 | 6 | 646.25   | 3166.833333 | 2520.583333 | 2.35947408  | 2.535028625 | Higher in TRIM24 | 426   | 246   | 796    | 1117   | 7395  | 3412 | 3303 | 1182 | 1204 | 2505  |
| ENSMUSG00000056078.5   | Lipm      | 9.81E-05    | 0.001658302 | 4 | 6 | 662.75   | 67.83333333 | 594.9166667 | 3.063001913 | 3.48096973  | Higher in Normal | 463   | 639   | 773    | 776    | 59    | 13   | 15   | 2    | 282  | 36    |
| ENSMUSG00000096632.2   | Igkv9-124 | 0.000101246 | 0.001701187 | 4 | 6 | 64.25    | 4.166666667 | 60.08333333 | 3.274852224 | 3.822595063 | Higher in Normal | 11    | 67    | 81     | 98     | 8     | 2    | 13   | 0    | 1    | 1     |
| ENSMUSG00000022496.5   | Tnfrsf17  | 0.000101667 | 0.001706474 | 4 | 6 | 38.25    | 4.166666667 | 34.08333333 | 3.186369323 | 3.675429809 | Higher in Normal | 45    | 91    | 13     | 4      | 2     | 0    | 4    | 2    | 8    | 9     |
| ENSMUSG00000090877.3   | Hspa1b    | 0.000102075 | 0.001712389 | 4 | 6 | 62492.75 | 4297        | 58195.75    | 3.421675023 | 4.057657993 | Higher in Normal | 781   | 1111  | 117010 | 131069 | 1423  | 740  | 1584 | 3988 | 4034 | 14013 |
| ENSMUSG000000042662.16 | Dusp15    | 0.000103814 | 0.001738942 | 4 | 6 | 59       | 7.833333333 | 51.16666667 | 2.959282355 | 3.331274865 | Higher in Normal | 191   | 81    | 55     | 81     | 1     | 2    | 0    | 3    | 20   | 21    |
| ENSMUSG00000071658.4   | Gng3      | 0.000105379 | 0.001760092 | 4 | 6 | 43.75    | 9.166666667 | 34.58333333 | 2.363487081 | 2.53807329  | Higher in Normal | 93    | 31    | 39     | 12     | 8     | 5    | 3    | 4    | 12   | 23    |
| ENSMUSG000000078554.2  | Fam229a   | 0.000106474 | 0.001774992 | 4 | 6 | 10       | 0.666666667 | 9.333333333 | 3.338090802 | 3.957783155 | Higher in Normal | 5     | 7     | 12     | 16     | 2     | 0    | 0    | 0    | 1    | 1     |
| ENSMUSG00000004885.5   | Crabp2    | 0.000107493 | 0.001783266 | 4 | 6 | 1119.5   | 10402.33333 | 9282.833333 | 2.47180934  | 2.680333139 | Higher in TRIM24 | 839   | 356   | 1340   | 1943   | 3562  | 749  | 6943 | 1898 | 7060 | 42202 |
| ENSMUSG00000001773.14  | Fohl1     | 0.00010768  | 0.001785746 | 4 | 6 | 268.5    | 15          | 253.5       | 3.832992901 | 4.868989833 | Higher in Normal | 406   | 650   | 11     | 7      | 0     | 2    | 5    | 2    | 43   | 38    |
| ENSMUSG00000055737.12  | Ghr       | 0.000109027 | 0.001807098 | 4 | 6 | 12529    | 2431        | 10098       | 2.678928333 | 2.945137655 | Higher in Normal | 22057 | 23449 | 2315   | 2295   | 1909  | 635  | 1384 | 591  | 2633 | 7434  |
| ENSMUSG00000047990.6   | C2cd4a    | 0.000110011 | 0.001820443 | 4 | 6 | 132.75   | 8.166666667 | 124.5833333 | 3.186016638 | 3.863767152 | Higher in Normal | 23    | 2     | 196    | 310    | 9     | 13   | 7    | 8    | 3    | 3     |
| ENSMUSG00000050071.8   | Bex1      | 0.000110182 | 0.001821571 | 4 | 6 | 173.75   | 18.16666667 | 155.5833333 | 2.896171571 | 3.246231327 | Higher in Normal | 72    | 156   | 187    | 280    | 2     | 4    | 71   | 7    | 13   | 12    |
| ENSMUSG00000035459.17  | Stab2     | 0.000110831 | 0.001827918 | 4 | 6 | 123.75   | 28.66666667 | 95.08333333 | 2.378853086 | 2.557238492 | Higher in Normal | 205   | 59    | 124    | 107    | 2     | 6    | 23   | 9    | 40   | 92    |
| ENSMUSG00000110298.1   | Gm8189    | 0.000110883 | 0.001827918 | 4 | 6 | 106.5    | 21.33333333 | 85.16666667 | 2.678226484 | 2.943595286 | Higher in Normal | 128   | 189   | 68     | 41     | 9     | 2    | 8    | 3    | 39   | 67    |
| ENSMUSG000000043673.11 | Kcns3     | 0.000111939 | 0.001841342 | 4 | 6 | 512.25   | 56.5        | 455.75      | 3.003149043 | 3.401496314 | Higher in Normal | 381   | 944   | 103    | 151    | 13    | 30   | 172  | 8    | 66   | 50    |
| ENSMUSG00000097639.2   | Platr4    | 0.000112239 | 0.001845271 | 4 | 6 | 64.75    | 7.166666667 | 57.58333333 | 3.101330831 | 3.548220297 | Higher in Normal | 83    | 75    | 63     | 38     | 7     | 0    | 0    | 1    | 22   | 13    |
| ENSMUSG000000039252.11 | Lig2      | 0.000113365 | 0.001859765 | 4 | 6 | 65.75    | 65.33333333 | 58.41666667 | 2.735147596 | 3.035253079 | Higher in TRIM24 | 79    | 127   | 26     | 6      | 66    | 98   | 1225 | 746  | 695  | 1089  |
| ENSMUSG00000030724.7   | Cd19      | 0.000113544 | 0.001861712 | 4 | 6 | 289.25   | 27.33333333 | 261.9166667 | 3.053035944 | 3.477716435 | Higher in Normal | 44    | 497   | 324    | 292    | 2     | 10   | 101  | 11   | 21   | 19    |
| ENSMUSG000000083355.1  | Gm11581   | 0.000113644 | 0.001862344 | 4 | 6 | 17       | 1.166666667 | 15.83333333 | 3.361674574 | 4.007316032 | Higher in Normal | 40    | 15    | 11     | 2      | 0     | 1    | 1    | 1    | 3    | 1     |
| ENSMUSG00000051041.7   | Ofml1     | 0.000113827 | 0.001864337 | 4 | 6 | 488      | 58.66666667 | 429.3333333 | 2.975098814 | 3.361228159 | Higher in Normal | 947   | 863   | 71     | 71     | 23    | 22   | 85   | 15   | 159  | 48    |
| ENSMUSG00000047502.14  | Mroh7     | 0.000114749 | 0.00187641  | 4 | 6 | 37.25    | 5.5         | 31.75       | 2.726076198 | 3.010501769 | Higher in Normal | 66    | 11    | 49     | 23     | 0     | 2    | 7    | 1    | 11   | 12    |
| ENSMUSG00000024064.13  | Galnt14   | 0.000114859 | 0.0018772   | 4 | 6 | 173.5    | 21          | 152.5       | 3.045448861 | 3.464417054 | Higher in Normal | 146   | 28    | 254    | 266    | 6     | 5    | 1    | 4    | 67   | 61    |
| ENSMUSG00000000305.12  | cdh4      | 0.000115668 | 0.001888392 | 4 | 6 | 90.5     | 17.83333333 | 72.66666667 | 2.630661982 | 2.881431106 | Higher in Normal | 197   | 32    | 92     | 41     | 3     | 6    | 6    | 23   | 66   | 66    |
| ENSMUSG00000104088.1   | Gm38275   | 0.000116404 | 0.001893933 | 4 | 6 | 2.25     | 18          | 15.75       | 2.634667453 | 2.906553547 | Higher in TRIM24 | 4     | 2     | 3      | 0      | 7     | 7    | 17   | 25   | 23   | 29    |
| ENSMUSG000000028610.6  | Mmr1b1    | 0.000117603 | 0.001909118 | 4 | 6 | 40       | 1.666666667 | 38.33333333 | 3.912545001 | 5.090101323 | Higher in Normal | 90    | 1     | 59     | 10     | 0     | 0    | 0    | 0    | 4    | 6     |
| ENSMUSG00000042436.12  | Mfap4     | 0.000117231 | 0.001909811 | 4 | 6 | 342      | 2090        | 1748        | 2.468664757 | 2.679019832 | Higher in TRIM24 | 215   | 59    | 454    | 640    | 331   | 1065 | 4745 | 1119 | 3265 | 2015  |
| ENSMUSG00000055194.3   | Actb12    | 0.000117617 | 0.001914385 | 4 | 6 | 11.75    | 0.833333333 | 10.16666667 | 3.422560998 | 4.095996301 | Higher in Normal | 23    | 3     | 11     | 10     | 1     | 0    | 0    | 0    | 1    | 3     |
| ENSMUSG00000079163.3   | Gm15498   | 0.000117645 |             |   |   |          |             |             |             |             |                  |       |       |        |        |       |      |      |      |      |       |

|                        |               |             |             |   |   |          |             |             |             |                  |                  |       |       |       |      |      |      |      |      |      |      |      |
|------------------------|---------------|-------------|-------------|---|---|----------|-------------|-------------|-------------|------------------|------------------|-------|-------|-------|------|------|------|------|------|------|------|------|
| ENSMUSG0000072624.2    | Gm5460        | 0.000148403 | 0.002316016 | 4 | 6 | 16.5     | 0.833333333 | 15.66666667 | 3.693881792 | 4.712603703      | Higher in Normal | 29    | 32    | 2     | 3    | 0    | 1    | 0    | 0    | 2    | 2    |      |
| ENSMUSG0000092094.5    | Zfp804b       | 0.000148554 | 0.002316016 | 4 | 6 | 25.75    | 2           | 23.75       | 3.279194317 | 3.87272996       | Higher in Normal | 40    | 2     | 52    | 9    | 2    | 2    | 0    | 0    | 2    | 6    |      |
| ENSMUSG00000025930.6   | Msc           | 0.000148783 | 0.002318402 | 4 | 6 | 315.5    | 43.33333333 | 272.1666667 | 2.488719159 | 2.707083254      | Higher in Normal | 225   | 298   | 316   | 423  | 10   | 50   | 105  | 64   | 17   | 17   |      |
| ENSMUSG00000054909.11  | Wbscr25       | 0.000151219 | 0.002347936 | 4 | 6 | 107.5    | 15.83333333 | 91.66666667 | 2.741584334 | 3.044519109      | Higher in Normal | 218   | 35    | 106   | 71   | 13   | 4    | 3    | 1    | 47   | 27   |      |
| ENSMUSG00000005672.12  | Kit           | 0.000151557 | 0.002350791 | 4 | 6 | 11731.25 | 1881.5      | 9849.75     | 2.663664096 | Higher in Normal | 4399             | 6382  | 19401 | 16743 | 2664 | 357  | 1307 | 375  | 5409 | 1177 | 1177 |      |
| ENSMUSG00000034472.13  | Rasd2         | 0.000153309 | 0.002374926 | 4 | 6 | 370.25   | 31.33333333 | 338.9166667 | 2.942358916 | 3.333132062      | Higher in Normal | 47    | 104   | 626   | 704  | 72   | 21   | 56   | 2    | 18   | 19   | 19   |
| ENSMUSG00000033717.5   | Adra2a        | 0.00015402  | 0.002382784 | 4 | 6 | 240.75   | 1822.666667 | 1581.916667 | 2.799263721 | 3.142081705      | Higher in TRIM24 | 101   | 175   | 309   | 378  | 66   | 1432 | 3377 | 3658 | 895  | 1508 | 1508 |
| ENSMUSG00000051314.11  | Ffar2         | 0.000154167 | 0.002382784 | 4 | 6 | 1332.5   | 151         | 1181.5      | 3.049576656 | 3.493678414      | Higher in Normal | 1273  | 3835  | 83    | 139  | 67   | 40   | 168  | 138  | 320  | 173  | 173  |
| ENSMUSG00000011382.8   | Dhdh          | 0.00015462  | 0.002387352 | 4 | 6 | 2233.75  | 365         | 1868.75     | 2.648172156 | 2.918475382      | Higher in Normal | 4810  | 3429  | 320   | 376  | 271  | 171  | 264  | 154  | 839  | 491  | 491  |
| ENSMUSG00000030732.13  | Chrdl2        | 0.000155261 | 0.002395829 | 4 | 6 | 188.5    | 18.16666667 | 170.3333333 | 2.897133515 | 3.268367466      | Higher in Normal | 176   | 5     | 235   | 338  | 6    | 21   | 34   | 2    | 26   | 20   | 20   |
| ENSMUSG00000021943.6   | gdf10         | 0.000155326 | 0.002395829 | 4 | 6 | 249      | 47.33333333 | 201.6666667 | 2.481067857 | 2.697871359      | Higher in Normal | 289   | 368   | 150   | 189  | 26   | 8    | 39   | 8    | 159  | 44   | 44   |
| ENSMUSG00000015843.10  | Rxrg          | 0.000155883 | 0.002401861 | 4 | 6 | 310      | 25.33333333 | 284.6666667 | 3.339585347 | 3.9667709        | Higher in Normal | 569   | 606   | 25    | 40   | 27   | 8    | 8    | 1    | 90   | 18   | 18   |
| ENSMUSG00000053719.10  | Klklb26       | 0.000155954 | 0.002401861 | 4 | 6 | 19.25    | 1.333333333 | 17.91666667 | 3.598928577 | 4.460832689      | Higher in Normal | 45    | 21    | 9     | 2    | 1    | 0    | 0    | 0    | 1    | 6    | 6    |
| ENSMUSG00000052551.16  | Adarb2        | 0.000157524 | 0.002423599 | 4 | 6 | 24.25    | 4.166666667 | 20.08333333 | 2.738627973 | 3.038543415      | Higher in Normal | 28    | 28    | 31    | 10   | 2    | 0    | 3    | 0    | 5    | 15   | 15   |
| ENSMUSG00000042734.6   | Ttcr9         | 0.000158663 | 0.002438647 | 4 | 6 | 279.5    | 1298.5      | 1019        | 2.322897583 | 2.502092949      | Higher in TRIM24 | 97    | 447   | 509   | 2252 | 1730 | 1338 | 635  | 810  | 1026 | 1026 | 1026 |
| ENSMUSG00000098403.1   | Gm27415       | 0.0001599   | 0.00245395  | 4 | 6 | 28       | 2.666666667 | 25.33333333 | 2.979049494 | 3.397591882      | Higher in Normal | 12    | 4     | 61    | 35   | 1    | 3    | 1    | 0    | 7    | 4    | 4    |
| ENSMUSG000000031489.15 | Adrb3         | 0.000160697 | 0.002462451 | 4 | 6 | 5529.25  | 231.1666667 | 5298.083333 | 3.84057613  | 4.990579752      | Higher in Normal | 12200 | 9780  | 73    | 64   | 171  | 20   | 53   | 7    | 1047 | 89   | 89   |
| ENSMUSG00000044405.4   | Adig          | 0.000162796 | 0.00248836  | 4 | 6 | 3453.25  | 202.3333333 | 3250.916667 | 3.606305942 | 4.471308058      | Higher in Normal | 6701  | 6568  | 220   | 324  | 192  | 23   | 45   | 5    | 889  | 60   | 60   |
| ENSMUSG00000027520.15  | Zdfb2         | 0.000163195 | 0.002492723 | 4 | 6 | 69.5     | 7.166666667 | 62.33333333 | 3.115726278 | 3.598088146      | Higher in Normal | 14    | 7     | 178   | 79   | 2    | 0    | 6    | 1    | 11   | 23   | 23   |
| ENSMUSG00000031289.10  | H13ra2        | 0.000164363 | 0.002504771 | 4 | 6 | 27.25    | 790.3333333 | 763.0833333 | 3.413747521 | 4.181275202      | Higher in TRIM24 | 48    | 48    | 7     | 6    | 15   | 60   | 125  | 1006 | 144  | 3392 | 3392 |
| ENSMUSG00000104427.1   | Gm38368       | 0.000165154 | 0.002515667 | 4 | 6 | 15.25    | 1.333333333 | 13.91666667 | 3.241725209 | 3.829207571      | Higher in Normal | 36    | 13    | 8     | 4    | 2    | 1    | 0    | 0    | 1    | 4    | 4    |
| ENSMUSG00000031323.8   | Dmrtc1a       | 0.000165724 | 0.00252298  | 4 | 6 | 17.5     | 0.666666667 | 16.83333333 | 3.705166023 | 4.730989122      | Higher in Normal | 11    | 6     | 17    | 36   | 0    | 0    | 0    | 0    | 4    | 0    | 0    |
| ENSMUSG00000106957.1   | Gm43085       | 0.000166102 | 0.002527448 | 4 | 6 | 104      | 16.33333333 | 87.66666667 | 2.951593255 | 3.348887667      | Higher in Normal | 82    | 155   | 71    | 108  | 12   | 1    | 2    | 0    | 18   | 65   | 65   |
| ENSMUSG00000053963.7   | Stum          | 0.000166852 | 0.002535092 | 4 | 6 | 127.5    | 20.5        | 107         | 2.512300015 | 2.740605095      | Higher in Normal | 57    | 27    | 208   | 218  | 22   | 2    | 13   | 4    | 51   | 31   | 31   |
| ENSMUSG00000106004.4   | Gm43391       | 0.000168524 | 0.002557941 | 4 | 6 | 27.75    | 2.333333333 | 25.41666667 | 3.234441003 | 3.8097685        | Higher in Normal | 71    | 14    | 20    | 6    | 0    | 2    | 0    | 1    | 7    | 4    | 4    |
| ENSMUSG00000091373.4   | Gm8810        | 0.000169278 | 0.002566828 | 4 | 6 | 60.25    | 4.666666667 | 55.58333333 | 3.27343719  | 3.865385215      | Higher in Normal | 9     | 34    | 108   | 90   | 3    | 0    | 1    | 0    | 19   | 5    | 5    |
| ENSMUSG00000074472.10  | Zfp872        | 0.000170766 | 0.002585525 | 4 | 6 | 58.25    | 3.833333333 | 54.41666667 | 3.424516677 | 4.136927151      | Higher in Normal | 106   | 62    | 33    | 32   | 0    | 1    | 2    | 1    | 19   | 0    | 0    |
| ENSMUSG00000029195.10  | klb           | 0.000173888 | 0.002628863 | 4 | 6 | 452.75   | 36.5        | 416.25      | 3.309787627 | 3.927930401      | Higher in Normal | 1206  | 529   | 45    | 31   | 3    | 7    | 11   | 8    | 144  | 16   | 16   |
| ENSMUSG00000071177.4   | Serpina1d     | 0.000174669 | 0.002639276 | 4 | 6 | 30.75    | 3.166666667 | 27.58333333 | 2.847385651 | 3.214048345      | Higher in Normal | 63    | 23    | 11    | 26   | 4    | 4    | 2    | 2    | 7    | 0    | 0    |
| ENSMUSG00000110622.1   | lqcn          | 0.000175748 | 0.002634906 | 4 | 6 | 29.5     | 2.666666667 | 26.83333333 | 3.205482743 | 3.753064209      | Higher in Normal | 24    | 2     | 73    | 19   | 3    | 0    | 1    | 0    | 3    | 9    | 9    |
| ENSMUSG00000047182.6   | lrs3          | 0.000179137 | 0.002694847 | 4 | 6 | 699.25   | 53          | 646.25      | 3.378515177 | 4.052800171      | Higher in Normal | 1391  | 1374  | 14    | 18   | 20   | 23   | 42   | 21   | 172  | 40   | 40   |
| ENSMUSG00000031144.15  | Syp           | 0.000179907 | 0.002705089 | 4 | 6 | 387.25   | 60.66666667 | 326.5833333 | 2.812080592 | 3.153350398      | Higher in Normal | 474   | 967   | 59    | 49   | 28   | 11   | 46   | 36   | 126  | 117  | 117  |
| ENSMUSG00000018486.2   | Wnt9b         | 0.000180455 | 0.002711993 | 4 | 6 | 15.75    | 2.166666667 | 13.58333333 | 3.671866128 | 2.961967783      | Higher in Normal | 15    | 3     | 27    | 18   | 0    | 1    | 2    | 2    | 3    | 5    | 5    |
| ENSMUSG00000083307.1   | AA414768      | 0.000181631 | 0.002728314 | 4 | 6 | 38.25    | 259.1666667 | 202.9166667 | 2.479340007 | 2.708876216      | Higher in TRIM24 | 56    | 46    | 23    | 28   | 47   | 125  | 429  | 462  | 65   | 427  | 427  |
| ENSMUSG00000021223.13  | Papln         | 0.000182021 | 0.002731753 | 4 | 6 | 3549.25  | 286         | 3263.25     | 3.076155635 | 3.548248266      | Higher in Normal | 761   | 1353  | 7714  | 4369 | 761  | 34   | 88   | 21   | 694  | 118  | 118  |
| ENSMUSG00000102376.1   | Gm37975       | 0.000182039 | 0.002731753 | 4 | 6 | 140.25   | 23.83333333 | 116.4166667 | 2.815758571 | 3.157701252      | Higher in Normal | 281   | 121   | 56    | 103  | 8    | 3    | 5    | 1    | 50   | 76   | 76   |
| ENSMUSG00000086455.1   | Gm11815       | 0.000182623 | 0.002739167 | 4 | 6 | 0.25     | 7.666666667 | 7.416666667 | 3.608419293 | 4.625402227      | Higher in TRIM24 | 1     | 0     | 0     | 0    | 5    | 3    | 8    | 8    | 15   | 7    | 7    |
| ENSMUSG00000074971.4   | Fbin          | 0.000183001 | 0.002742372 | 4 | 6 | 341.5    | 2285.833333 | 1944.333333 | 2.410498733 | 2.618518345      | Higher in TRIM24 | 455   | 429   | 213   | 269  | 294  | 1212 | 6693 | 1152 | 1503 | 2861 | 2861 |
| ENSMUSG00000038663.7   | Fsd2          | 0.000183665 | 0.002749372 | 4 | 6 | 324.5    | 36          | 288.5       | 3.043015867 | 3.49807984       | Higher in Normal | 410   | 827   | 26    | 35   | 20   | 16   | 73   | 7    | 64   | 36   | 36   |
| ENSMUSG00000094689.1   | lghv1-81      | 0.000184006 | 0.002752592 | 4 | 6 | 11       | 1.166666667 | 9.833333333 | 3.01710373  | 3.479871811      | Higher in Normal | 9     | 19    | 8     | 8    | 1    | 1    | 0    | 0    | 3    | 2    | 2    |
| ENSMUSG00000047361.16  | Gm973         | 0.000184983 | 0.002762322 | 4 | 6 | 135.25   | 30          | 105.25      | 2.416643556 | 2.61981195       | Higher in Normal | 187   | 76    | 120   | 158  | 21   | 3    | 7    | 3    | 57   | 89   | 89   |
| ENSMUSG00000041449.16  | Serpina3h     | 0.000188077 | 0.002803019 | 4 | 6 | 27.25    | 286.8333333 | 259.5833333 | 2.824949912 | 3.192767117      | Higher in TRIM24 | 33    | 18    | 26    | 32   | 218  | 33   | 799  | 10   | 106  | 555  | 555  |
| ENSMUSG00000113757.1   | Gm47507       | 0.000188267 | 0.002803102 | 4 | 6 | 1.25     | 19.16666667 | 17.91666667 | 3.393237393 | 4.203167603      | Higher in TRIM24 | 2     | 1     | 1     | 1    | 1    | 55   | 24   | 7    | 17   | 11   | 11   |
| ENSMUSG00000038296.14  | Galt18        | 0.00018974  | 0.002822228 | 4 | 6 | 3903.25  | 542         | 3361.25     | 2.499837624 | 2.729505409      | Higher in Normal | 837   | 737   | 6280  | 7759 | 841  | 155  | 667  | 173  | 1084 | 332  | 332  |
| ENSMUSG00000038227.15  | Hoxa9         | 0.000190266 | 0.002827342 | 4 | 6 | 272.75   | 41          | 231.75      | 2.845653585 | 3.20497304       | Higher in Normal | 395   | 573   | 75    | 48   | 67   | 9    | 14   | 4    | 54   | 98   | 98   |
| ENSMUSG00000078949.2   | R3hdm1        | 0.000190544 | 0.002829767 | 4 | 6 | 359.5    | 47.33333333 | 312.1666667 | 2.793906259 | 3.130747462      | Higher in Normal | 366   | 84    | 373   | 615  | 3    | 2    | 62   | 58   | 21   | 138  | 138  |
| ENSMUSG00000086679.2   | Gm15551       | 0.000190615 | 0.002829767 | 4 | 6 | 88       | 2.5         | 85.5        | 3.93902816  | 5.349512175      | Higher in Normal | 194   | 157   | 1     | 0    | 3    | 1    | 0    | 2    | 8    | 1    | 1    |
| ENSMUSG00000001670.13  | Tat           | 0.000190902 | 0.002831257 | 4 | 6 | 17       | 2           | 15          | 2.851195995 | 3.217885656      | Higher in Normal | 19    | 3     | 22    | 24   | 0    | 1    | 3    | 0    | 4    | 4    | 4    |
| ENSMUSG00000059027.14  | 9630013D21Rik | 0.000190999 | 0.002831317 | 4 | 6 | 290      | 30.33333333 | 259.6666667 | 3.227159055 | 3.797857142      | Higher in Normal | 681   | 422   | 30    | 27   | 3    | 8    | 2    | 8    | 29   | 55   | 55   |
| ENSMUSG00000067594.5   | Krt77         | 0.000192833 | 0.002852957 | 4 | 6 | 176      | 21.5        | 154.5       | 2.977465579 | 3.399647652      | Higher in Normal | 66    | 18    | 260   | 360  | 6    | 2    | 1    | 39   | 73   | 73   | 73   |
| ENSMUSG00000048031.15  | Fcrl5         | 0.000193724 | 0.002863348 | 4 | 6 | 99       | 12.33333333 | 86.66666667 | 2.948300999 | 3.35689217       | Higher in Normal | 66    | 130   | 92    | 108  | 4    | 0    | 30   | 0    | 13   | 27   | 27   |
| ENSMUSG00000023243.8   | Ccrn5         | 0.000194072 | 0.002867107 | 4 | 6 | 4477.25  | 600.6666667 | 3876.583333 | 3.078030289 | 3.078034788      | Higher in Normal | 730   | 886   | 7648  | 8645 | 445  | 24   | 291  | 203  | 1429 | 1212 | 1212 |
| ENSMUSG00000045053.1   | Kcng3         | 0.000194199 | 0.002867956 | 4 | 6 | 22       | 1.833333333 | 20.16666667 | 3.240208372 | 3.829835357      | Higher in Normal | 34    | 1     | 35    | 18   | 1    | 0    |      |      |      |      |      |

|                        |            |             |             |   |   |         |             |             |             |              |                  |       |       |       |       |       |      |       |       |      |        |    |
|------------------------|------------|-------------|-------------|---|---|---------|-------------|-------------|-------------|--------------|------------------|-------|-------|-------|-------|-------|------|-------|-------|------|--------|----|
| ENSMUSG00000030786.18  | Itgam      | 0.000241304 | 0.003433276 | 4 | 6 | 273.5   | 2029.666667 | 1756.166667 | 2.322241599 | 2.513924999  | Higher in TRIM24 | 256   | 657   | 68    | 113   | 727   | 742  | 2347  | 2076  | 1486 | 4800   |    |
| ENSMUSG00000054659.13  | Pm20d2     | 0.000242632 | 0.003447349 | 4 | 6 | 99.75   | 13.83333333 | 85.91666667 | 2.560536289 | 2.820729416  | Higher in Normal | 89    | 22    | 189   | 99    | 29    | 6    | 5     | 1     | 2    | 19     | 13 |
| ENSMUSG000000113010.1  | Gm34084    | 0.000243921 | 0.003455979 | 4 | 6 | 30.25   | 4.666666667 | 25.58333333 | 2.724343524 | 3.045935477  | Higher in Normal | 50    | 35    | 19    | 17    | 2     | 0    | 1     | 1     | 2    | 15     | 8  |
| ENSMUSG00000076587.3   | Igkv6-20   | 0.000245176 | 0.003467309 | 4 | 6 | 52.5    | 3.833333333 | 48.66666667 | 3.180706068 | 3.758231369  | Higher in Normal | 3     | 83    | 47    | 77    | 8     | 0    | 10    | 2     | 1    | 2      |    |
| ENSMUSG00000060002.14  | Chpt1      | 0.000246274 | 0.003479608 | 4 | 6 | 16700.5 | 2383.333333 | 14317.16667 | 2.722556321 | 3.044063970  | Higher in Normal | 38758 | 19312 | 4283  | 4449  | 3783  | 3673 | 1219  | 638   | 6472 | 1825   |    |
| ENSMUSG00000102187.1   | Gm7897     | 0.000247109 | 0.003487755 | 4 | 6 | 3       | 70.5        | 67.5        | 3.563135565 | 4.614322787  | Higher in TRIM24 | 3     | 0     | 5     | 4     | 176   | 14   | 1     | 4     | 207  | 21     |    |
| ENSMUSG00000106874.1   | Gm20186    | 0.000247149 | 0.003487755 | 4 | 6 | 8       | 137.8333333 | 129.8333333 | 3.271733982 | 3.971840523  | Higher in TRIM24 | 9     | 5     | 10    | 8     | 4651  | 11   | 6     | 18    | 16   | 315    |    |
| ENSMUSG00000069867.3   | Pabnp11    | 0.000247194 | 0.003487755 | 4 | 6 | 8.5     | 0.666666667 | 7.583333333 | 3.16577231  | 3.782287502  | Higher in Normal | 7     | 10    | 7     | 10    | 0     | 0    | 0     | 2     | 1    | 1      |    |
| ENSMUSG00000061535.11  | Clqtnf7    | 0.000247844 | 0.003493682 | 4 | 6 | 190.25  | 37.66666667 | 152.8333333 | 2.439906293 | 2.661043748  | Higher in Normal | 306   | 313   | 77    | 65    | 26    | 13   | 50    | 4     | 82   | 51     |    |
| ENSMUSG00000044933.2   | Sstr3      | 0.000248163 | 0.003495417 | 4 | 6 | 48      | 2.5         | 45.5        | 3.722352819 | 4.82282939   | Higher in Normal | 2     | 3     | 93    | 94    | 0     | 0    | 1     | 0     | 1    | 13     |    |
| ENSMUSG00000047257.13  | Prrs45     | 0.000248197 | 0.003495417 | 4 | 6 | 30.75   | 1           | 29.75       | 3.958705146 | 5.527433463  | Higher in Normal | 89    | 1     | 32    | 1     | 0     | 0    | 1     | 0     | 0    | 5      |    |
| ENSMUSG00000047976.4   | Kcna1      | 0.000253593 | 0.003559883 | 4 | 6 | 99      | 13.33333333 | 85.66666667 | 3.039983288 | 3.516648449  | Higher in Normal | 113   | 47    | 155   | 81    | 1     | 1    | 2     | 0     | 24   | 52     |    |
| ENSMUSG00000026354.8   | Lct        | 0.000257083 | 0.003599644 | 4 | 6 | 53.25   | 9.5         | 43.75       | 2.557150055 | 2.816364743  | Higher in Normal | 87    | 9     | 66    | 51    | 6     | 1    | 1     | 2     | 4    | 18     | 27 |
| ENSMUSG00000025701.12  | Alou5      | 0.000257479 | 0.003602809 | 4 | 6 | 80.25   | 701         | 620.75      | 2.807958341 | 3.188953556  | Higher in TRIM24 | 176   | 93    | 26    | 26    | 102   | 1259 | 1675  | 291   | 357  | 522    |    |
| ENSMUSG00000067144.6   | Slc22a7    | 0.000259313 | 0.003621819 | 4 | 6 | 15.25   | 0.5         | 14.75       | 3.921746998 | 5.287892752  | Higher in Normal | 43    | 4     | 11    | 3     | 0     | 0    | 0     | 0     | 0    | 3      |    |
| ENSMUSG00000025911.14  | Adhfe1     | 0.00026238  | 0.003660705 | 4 | 6 | 1508.75 | 163.6666667 | 1345.083333 | 3.03535128  | 3.51649277   | Higher in Normal | 3556  | 2285  | 107   | 87    | 190   | 49   | 89    | 39    | 456  | 159    |    |
| ENSMUSG00000024503.2   | Spink1     | 0.000262749 | 0.003663091 | 4 | 6 | 10.5    | 1.166666667 | 9.333333333 | 2.95310515  | 3.413740681  | Higher in Normal | 11    | 18    | 6     | 7     | 0     | 1    | 2     | 0     | 2    | 2      |    |
| ENSMUSG00000025279.7   | Dnae13     | 0.000265732 | 0.003701288 | 4 | 6 | 2337.25 | 346.8333333 | 1990.416667 | 2.452617144 | 2.680259002  | Higher in Normal | 368   | 698   | 3754  | 4529  | 98    | 82   | 247   | 486   | 796  | 372    |    |
| ENSMUSG00000068617.4   | Efcab1     | 0.000286703 | 0.00372877  | 4 | 6 | 186.5   | 17.83333333 | 168.6666667 | 3.150349654 | 3.704922692  | Higher in Normal | 44    | 62    | 316   | 324   | 1     | 0    | 9     | 2     | 57   | 38     |    |
| ENSMUSG00000055254.14  | Nlrlc2     | 0.000271934 | 0.003773861 | 4 | 6 | 3595.75 | 491         | 3104.75     | 2.80660854  | 3.170922968  | Higher in Normal | 6122  | 7292  | 477   | 492   | 759   | 114  | 456   | 105   | 1035 | 477    |    |
| ENSMUSG00000037405.8   | Icam1      | 0.000272478 | 0.003779686 | 4 | 6 | 11508   | 1313        | 10195       | 2.687547475 | 3.00037317   | Higher in Normal | 774   | 927   | 20977 | 23354 | 765   | 626  | 1684  | 833   | 2951 | 1019   |    |
| ENSMUSG00000106709.1   | Gm30270    | 0.000274296 | 0.003799705 | 4 | 6 | 39.25   | 2.833333333 | 36.41666667 | 3.365699491 | 4.106762979  | Higher in Normal | 96    | 56    | 1     | 4     | 2     | 2    | 2     | 0     | 7    | 4      |    |
| ENSMUSG00000022061.8   | Nlrx3-1    | 0.000275547 | 0.003810103 | 4 | 6 | 175.5   | 11.66666667 | 163.8333333 | 3.626200715 | 4.624919238  | Higher in Normal | 45    | 30    | 276   | 351   | 1     | 0    | 0     | 0     | 11   | 58     |    |
| ENSMUSG00000000385.7   | Tmprss2    | 0.000276323 | 0.003819106 | 4 | 6 | 2773.25 | 376.3333333 | 2396.916667 | 2.647684835 | 2.945417583  | Higher in Normal | 1623  | 3544  | 2923  | 3003  | 691   | 36   | 329   | 97    | 1033 | 72     |    |
| ENSMUSG00000035930.9   | Chst4      | 0.000279254 | 0.00384913  | 4 | 6 | 88.75   | 7.333333333 | 81.41666667 | 3.365669916 | 4.089704975  | Higher in Normal | 26    | 8     | 142   | 179   | 0     | 1    | 1     | 0     | 13   | 29     |    |
| ENSMUSG00000033715.15  | Akr1c14    | 0.000280172 | 0.003856549 | 4 | 6 | 565.25  | 87.66666667 | 477.5833333 | 2.706462602 | 3.028549092  | Higher in Normal | 1482  | 372   | 205   | 202   | 22    | 9    | 63    | 31    | 295  | 106    |    |
| ENSMUSG00000030664.3   | Sow6os     | 0.000280454 | 0.003856941 | 4 | 6 | 97.75   | 4.166666667 | 93.58333333 | 3.755780647 | 4.965613582  | Higher in Normal | 210   | 178   | 3     | 0     | 2     | 1    | 3     | 0     | 15   | 4      |    |
| ENSMUSG00000027849.18  | Byt6       | 0.000280609 | 0.003857288 | 4 | 6 | 16      | 131         | 115         | 2.407726111 | 2.630709431  | Higher in TRIM24 | 39    | 4     | 12    | 9     | 56    | 11   | 113   | 50    | 205  | 351    |    |
| ENSMUSG00000039492.7   | Ccdc27     | 0.000281697 | 0.003868795 | 4 | 6 | 12.75   | 2           | 10.75       | 2.498479713 | 2.75038843   | Higher in Normal | 15    | 8     | 15    | 13    | 1     | 0    | 5     | 2     | 1    | 3      |    |
| ENSMUSG000000077273.10 | Gm10044    | 0.000282828 | 0.003879947 | 4 | 6 | 50.5    | 9.166666667 | 41.33333333 | 2.407242449 | 2.623742718  | Higher in Normal | 30    | 19    | 79    | 74    | 1     | 11   | 2     | 2     | 13   | 26     |    |
| ENSMUSG00000085272.7   | Sbk3       | 0.000283248 | 0.003883087 | 4 | 6 | 60.75   | 10          | 50.75       | 2.535904022 | 2.794068008  | Higher in Normal | 94    | 36    | 65    | 48    | 22    | 1    | 1     | 2     | 15   | 19     |    |
| ENSMUSG00000042115.4   | Klhdcc8a   | 0.000285442 | 0.003907882 | 4 | 6 | 77.5    | 521.1666667 | 443.6666667 | 2.705940975 | 3.044382679  | Higher in TRIM24 | 106   | 24    | 78    | 102   | 180   | 1008 | 108   | 1004  | 87   | 740    |    |
| ENSMUSG00000076605.2   | Igkb2      | 0.000287579 | 0.003953367 | 4 | 6 | 8.75    | 0.5         | 8.25        | 3.415999995 | 4.254606497  | Higher in Normal | 4     | 12    | 16    | 3     | 0     | 0    | 0     | 0     | 1    | 1      |    |
| ENSMUSG00000030170.14  | Wnt5b      | 0.000288787 | 0.003950134 | 4 | 6 | 4883    | 621         | 4262        | 2.685074743 | 3.000122264  | Higher in Normal | 1618  | 1239  | 7178  | 9497  | 779   | 84   | 245   | 95    | 2127 | 396    |    |
| ENSMUSG00000000058.6   | Cav2       | 0.000293345 | 0.004005274 | 4 | 6 | 8077    | 96876.16667 | 88799.16667 | 2.941618845 | 3.40786171   | Higher in TRIM24 | 12632 | 9587  | 4782  | 5307  | 25749 | 3520 | 81586 | 47720 | 4614 | 186168 |    |
| ENSMUSG00000027068.6   | Dhrs9      | 0.000294266 | 0.004016055 | 4 | 6 | 106.5   | 1007        | 900.5       | 3.008825845 | 3.518930471  | Higher in TRIM24 | 44    | 20    | 199   | 163   | 112   | 2979 | 469   | 102   | 388  | 1992   |    |
| ENSMUSG00000050359.7   | Sprr1a     | 0.000295233 | 0.004027447 | 4 | 6 | 79.5    | 997         | 917.5       | 3.016800332 | 3.532756524  | Higher in TRIM24 | 93    | 17    | 99    | 109   | 229   | 61   | 532   | 291   | 4706 | 163    |    |
| ENSMUSG000000025776.13 | Crispld1   | 0.000298664 | 0.004064867 | 4 | 6 | 319.75  | 69.16666667 | 250.5833333 | 2.339458409 | 2.537173154  | Higher in Normal | 196   | 147   | 450   | 486   | 9     | 18   | 18    | 19    | 182  | 169    |    |
| ENSMUSG00000022235.14  | Cmb1       | 0.000298813 | 0.004065355 | 4 | 6 | 1613.75 | 321         | 1292.75     | 2.504035517 | 2.753220045  | Higher in Normal | 2915  | 2970  | 225   | 345   | 141   | 126  | 397   | 234   | 156  | 872    |    |
| ENSMUSG00000028838.11  | Extl1      | 0.00030288  | 0.004115171 | 4 | 6 | 2163.5  | 217.6666667 | 1945.833333 | 2.822249065 | 3.201347432  | Higher in Normal | 977   | 754   | 3368  | 3555  | 542   | 142  | 98    | 72    | 535  | 45     |    |
| ENSMUSG00000073765.6   | Gm12863    | 0.000305939 | 0.004147747 | 4 | 6 | 10.5    | 0.666666667 | 9.833333333 | 3.39337686  | 4.160716626  | Higher in Normal | 12    | 2     | 12    | 16    | 0     | 0    | 0     | 0     | 2    | 2      |    |
| ENSMUSG00000086446.1   | Prkg2os1   | 0.000306095 | 0.004147747 | 4 | 6 | 98.5    | 20.5        | 78          | 2.376977148 | 2.58727524   | Higher in Normal | 148   | 181   | 24    | 41    | 22    | 7    | 5     | 14    | 38   | 37     |    |
| ENSMUSG00000074461.2   | Gm10699    | 0.000306807 | 0.004155544 | 4 | 6 | 28      | 2.833333333 | 25.16666667 | 3.150567226 | 3.730852024  | Higher in Normal | 58    | 45    | 2     | 7     | 1     | 0    | 1     | 3     | 5    | 7      |    |
| ENSMUSG00000022126.6   | Acdol1     | 0.000307789 | 0.004163721 | 4 | 6 | 103.75  | 989.6666667 | 85.91666667 | 2.835409821 | 3.243975593  | Higher in TRIM24 | 37    | 24    | 132   | 222   | 957   | 135  | 925   | 63    | 3475 | 383    |    |
| ENSMUSG00000054477.15  | Kcnn2      | 0.000313075 | 0.004220073 | 4 | 6 | 122.5   | 13.83333333 | 108.6666667 | 3.173230074 | 3.760881769  | Higher in Normal | 187   | 48    | 148   | 107   | 1     | 4    | 0     | 0     | 23   | 55     |    |
| ENSMUSG000000092528.9  | Nlrlp1c-ps | 0.000316483 | 0.004259029 | 4 | 6 | 12      | 0.666666667 | 11.33333333 | 3.406711221 | 4.231053449  | Higher in Normal | 3     | 8     | 32    | 5     | 0     | 2    | 0     | 2     | 0    | 1      |    |
| ENSMUSG00000043102.2   | Qrfp       | 0.000317392 | 0.00426665  | 4 | 6 | 38.5    | 302.5       | 264         | 2.716590831 | 3.067369075  | Higher in TRIM24 | 45    | 31    | 30    | 48    | 6     | 618  | 379   | 89    | 327  | 396    |    |
| ENSMUSG000000041198.15 | Zfp385c    | 0.000318629 | 0.004277603 | 4 | 6 | 41      | 6.833333333 | 34.16666667 | 2.625404621 | 2.922565324  | Higher in Normal | 107   | 11    | 31    | 15    | 1     | 5    | 7     | 2     | 4    | 22     |    |
| ENSMUSG00000096862.1   | Gm13301    | 0.000320434 | 0.004299942 | 4 | 6 | 17.5    | 0           | 17.75       | 4.163023238 | 4.6468182036 | Higher in Normal | 0     | 7     | 36    | 28    | 0     | 0    | 0     | 0     | 0    | 0      |    |
| ENSMUSG00000016255.5   | Tubb1      | 0.000322052 | 0.004319753 | 4 | 6 | 66.5    | 9.5         | 55.5        | 2.7563322   | 3.109371246  | Higher in Normal | 171   | 22    | 59    | 8     | 4     | 5    | 1     | 4     | 19   | 24     |    |
| ENSMUSG00000065999.13  | Zfp958     | 0.000324045 | 0.004340748 | 4 | 6 | 70.25   | 11.83333333 | 58.41666667 | 2.809566414 | 3.185116796  | Higher in Normal | 165   | 71    | 26    | 19    | 3     | 1    | 3     | 2     | 24   | 38     |    |
| ENSMUSG00000033219.8   | Gm9758     | 0.000325667 | 0.004360555 | 4 | 6 | 12.5    | 0.666666667 | 11.83333333 | 3.661887271 | 4.704442714  | Higher in Normal | 26    | 6     | 11    | 7     | 0     | 0    | 0     | 0     | 0    | 4      |    |
| ENSMUSG00000028927.6   | Padi2      | 0.00032615  | 0.004363048 | 4 | 6 | 442.5   | 3425.333333 | 2982.833333 | 2.792691825 | 3.182985625  | Higher in TRIM24 | 402   | 288   | 537   | 543   | 146   | 6936 | 8209  | 1483  | 733  | 3045   |    |
| ENSMUSG00000046367.10  | Mgat4e     | 0.000331723 | 0.004426078 | 4 | 6 | 24.25   | 0.833333333 | 2           |             |              |                  |       |       |       |       |       |      |       |       |      |        |    |



|                       |                |             |             |   |   |        |             |              |              |             |                  |       |       |      |       |      |      |      |      |      |       |
|-----------------------|----------------|-------------|-------------|---|---|--------|-------------|--------------|--------------|-------------|------------------|-------|-------|------|-------|------|------|------|------|------|-------|
| ENSMUSG00000086706.7  | Gm15848        | 0.000392962 | 0.005052861 | 4 | 6 | 17.25  | 2.5         | 14.75        | 2.817009429  | 3.212497587 | Higher in Normal | 13    | 30    | 9    | 17    | 1    | 0    | 1    | 0    | 7    | 6     |
| ENSMUSG00000100744.1  | Gm17764        | 0.000392971 | 0.005052861 | 4 | 6 | 8.25   | 0.833333333 | 7.416666667  | 2.904145719  | 3.382819586 | Higher in Normal | 11    | 6     | 7    | 9     | 2    | 0    | 0    | 1    | 1    | 1     |
| ENSMUSG00000095285.2  | lghv5-9        | 0.000395383 | 0.005081067 | 4 | 6 | 21.75  | 2.833333333 | 18.916666667 | 2.689820596  | 3.035862454 | Higher in Normal | 10    | 45    | 10   | 22    | 1    | 1    | 6    | 3    | 5    | 1     |
| ENSMUSG00000107835.1  | Gm43999        | 0.000397216 | 0.005093305 | 4 | 6 | 21.25  | 2.666666667 | 18.583333333 | 3.00483076   | 3.51517517  | Higher in Normal | 13    | 62    | 6    | 4     | 1    | 1    | 1    | 1    | 5    | 7     |
| ENSMUSG00000019796.12 | Lrp11          | 0.000397216 | 0.005093305 | 4 | 6 | 114.5  | 694.8333333 | 580.3333333  | 2.510244914  | 2.784932657 | Higher in TRIM24 | 205   | 135   | 58   | 60    | 184  | 1739 | 954  | 451  | 307  | 534   |
| ENSMUSG00000038801.6  | Sgb1c1c        | 0.000398396 | 0.005105341 | 4 | 6 | 7.5    | 0           | 7.5          | 3.838061348  | 5.323191242 | Higher in Normal | 13    | 2     | 5    | 10    | 0    | 0    | 0    | 0    | 0    | 0     |
| ENSMUSG00000010122.14 | Sic47a1        | 0.000398561 | 0.005105341 | 4 | 6 | 88.5   | 18          | 70.5         | 2.356659821  | 2.569045173 | Higher in Normal | 126   | 19    | 122  | 87    | 12   | 1    | 18   | 2    | 36   | 39    |
| ENSMUSG00000035186.6  | Ubd            | 0.000399053 | 0.005109494 | 4 | 6 | 2438.5 | 213.6666667 | 2224.8333333 | 3.093542535  | 3.656316524 | Higher in Normal | 1030  | 693   | 3144 | 4887  | 21   | 4    | 73   | 56   | 1017 | 111   |
| ENSMUSG00000036095.11 | Dgbk           | 0.000399566 | 0.005113825 | 4 | 6 | 99.5   | 11.83333333 | 87.666666667 | 3.050457285  | 3.581512789 | Higher in Normal | 135   | 71    | 94   | 98    | 2    | 0    | 2    | 0    | 37   | 30    |
| ENSMUSG00000030041.9  | M1ap           | 0.000401405 | 0.005130978 | 4 | 6 | 45.5   | 413.3333333 | 367.8333333  | 2.743045961  | 3.124064466 | Higher in TRIM24 | 96    | 39    | 17   | 30    | 73   | 959  | 161  | 124  | 81   | 1082  |
| ENSMUSG00000086096.1  | Gm12688        | 0.000407453 | 0.005196181 | 4 | 6 | 12.25  | 0.833333333 | 11.416666667 | 3.219817584  | 3.941730523 | Higher in Normal | 6     | 22    | 6    | 15    | 0    | 0    | 3    | 1    | 1    | 0     |
| ENSMUSG00000031618.13 | Nr3c2          | 0.000407894 | 0.005198638 | 4 | 6 | 1177.5 | 138.1666667 | 1039.3333333 | 2.694059448  | 3.033908856 | Higher in Normal | 568   | 539   | 1998 | 1605  | 375  | 14   | 72   | 11   | 280  | 77    |
| ENSMUSG000000076471.3 | Trbv14         | 0.000409212 | 0.005211073 | 4 | 6 | 14.75  | 0.5         | 14.25        | 3.501195561  | 4.64991904  | Higher in Normal | 1     | 4     | 27   | 27    | 0    | 1    | 1    | 1    | 0    | 0     |
| ENSMUSG00000030228.18 | Pik3c2g        | 0.000410251 | 0.005219939 | 4 | 6 | 168    | 29.83333333 | 138.1666667  | 2.687603129  | 3.02321051  | Higher in Normal | 211   | 32    | 236  | 193   | 4    | 3    | 8    | 2    | 57   | 105   |
| ENSMUSG00000085519.1  | Gm13703        | 0.000413262 | 0.005249483 | 4 | 6 | 15.25  | 1           | 14.25        | 3.429001412  | 4.333398696 | Higher in Normal | 31    | 23    | 6    | 1     | 1    | 0    | 0    | 0    | 3    | 2     |
| ENSMUSG00000028699.9  | Tspan1         | 0.000416239 | 0.005282892 | 4 | 6 | 851.25 | 84.83333333 | 766.4166667  | 2.81568471   | 3.215458464 | Higher in Normal | 213   | 586   | 1069 | 1537  | 252  | 1    | 80   | 33   | 98   | 45    |
| ENSMUSG00000057054.11 | Inca1          | 0.000417011 | 0.005290481 | 4 | 6 | 293.25 | 64.33333333 | 228.9166667  | 2.360333921  | 2.576695141 | Higher in Normal | 604   | 452   | 63   | 54    | 58   | 37   | 38   | 17   | 86   | 150   |
| ENSMUSG00000026961.6  | Lrrc26         | 0.000419424 | 0.005314449 | 4 | 6 | 142    | 21.6666667  | 120.3333333  | 2.409848049  | 3.642893381 | Higher in Normal | 50    | 172   | 151  | 195   | 37   | 8    | 20   | 16   | 47   | 2     |
| ENSMUSG00000091255.1  | Sperde         | 0.000419888 | 0.005318113 | 4 | 6 | 21     | 2           | 19           | 3.083565158  | 3.648272942 | Higher in Normal | 8     | 1     | 32   | 43    | 1    | 1    | 0    | 1    | 8    | 8     |
| ENSMUSG00000024558.12 | Mapk4          | 0.000420346 | 0.005321699 | 4 | 6 | 219.5  | 34.83333333 | 184.6666667  | 2.405349224  | 2.636432846 | Higher in Normal | 236   | 21    | 330  | 291   | 4    | 11   | 76   | 33   | 36   | 49    |
| ENSMUSG00000056973.6  | Ces1d          | 0.000422435 | 0.005344426 | 4 | 6 | 11894  | 560.5       | 11333.5      | 3.626593183  | 4.757529331 | Higher in Normal | 24256 | 22910 | 177  | 233   | 802  | 48   | 99   | 6    | 2259 | 149   |
| ENSMUSG00000045532.5  | C1qf1          | 0.000422492 | 0.005344426 | 4 | 6 | 2.25   | 23.1666667  | 20.9166667   | 2.907249101  | 3.400846233 | Higher in TRIM24 | 0     | 3     | 4    | 2     | 6    | 4    | 61   | 33   | 14   | 21    |
| ENSMUSG00000015599.8  | Ttbbk1         | 0.000423091 | 0.00534921  | 4 | 6 | 55.5   | 10.1666667  | 45.33333333  | 2.497122212  | 2.760017341 | Higher in Normal | 143   | 13    | 50   | 16    | 2    | 4    | 4    | 9    | 13   | 29    |
| ENSMUSG00000066583.4  | Sgb1b27        | 0.000423749 | 0.005351439 | 4 | 6 | 121    | 2.66666667  | 118.3333333  | 3.979423273  | 6.024010778 | Higher in Normal | 100   | 384   | 0    | 0     | 6    | 1    | 0    | 0    | 2    | 7     |
| ENSMUSG00000105419.1  | Gm43205        | 0.000424138 | 0.005354133 | 4 | 6 | 116.25 | 21.33333333 | 94.9166667   | 2.38535547   | 2.610210115 | Higher in Normal | 57    | 118   | 111  | 179   | 0    | 8    | 21   | 14   | 56   | 29    |
| ENSMUSG00000026303.6  | Mlph           | 0.000424266 | 0.005355538 | 4 | 6 | 4844.5 | 702.6666667 | 4141.8333333 | 2.4922866578 | 4.753311085 | Higher in Normal | 1712  | 3159  | 7146 | 7361  | 1716 | 108  | 351  | 107  | 1523 | 411   |
| ENSMUSG00000076512.2  | lghv9-123      | 0.000425016 | 0.005360764 | 4 | 6 | 17.5   | 1.16666667  | 16.33333333  | 3.278083955  | 4.045544877 | Higher in Normal | 23    | 34    | 8    | 5     | 0    | 0    | 4    | 2    | 0    | 1     |
| ENSMUSG00000091575.2  | 20100161818rik | 0.000425341 | 0.005362646 | 4 | 6 | 149.25 | 31.16666667 | 18.08333333  | 2.355855367  | 2.571677539 | Higher in Normal | 234   | 243   | 84   | 36    | 21   | 15   | 7    | 13   | 88   | 43    |
| ENSMUSG00000060924.15 | Csm1d          | 0.000426912 | 0.005377993 | 4 | 6 | 712.5  | 86.16666667 | 626.3333333  | 2.829394635  | 3.237892515 | Higher in Normal | 277   | 240   | 1483 | 850   | 12   | 5    | 16   | 32   | 357  | 95    |
| ENSMUSG00000089829.2  | Gm16565        | 0.000427345 | 0.005381227 | 4 | 6 | 25.5   | 4.5         | 21           | 2.676959073  | 3.00931358  | Higher in Normal | 48    | 28    | 15   | 11    | 1    | 1    | 2    | 0    | 9    | 14    |
| ENSMUSG00000034435.6  | Tmem30b        | 0.000437016 | 0.005421428 | 4 | 6 | 1899   | 224.5       | 1674.5       | 2.586609048  | 2.884289758 | Higher in Normal | 572   | 1017  | 2895 | 3112  | 701  | 58   | 94   | 107  | 341  | 46    |
| ENSMUSG00000102692.1  | Dchs2          | 0.000437422 | 0.005405111 | 4 | 6 | 440    | 57.66666667 | 382.3333333  | 2.502179799  | 2.768192459 | Higher in Normal | 93    | 29    | 1144 | 494   | 14   | 53   | 58   | 57   | 93   | 71    |
| ENSMUSG00000027485.15 | Bp1f1          | 0.000435833 | 0.005465006 | 4 | 6 | 107.75 | 8           | 99.75        | 3.068429244  | 3.628345051 | Higher in Normal | 35    | 12    | 174  | 210   | 26   | 2    | 1    | 0    | 11   | 8     |
| ENSMUSG00000027919.5  | Lce1g          | 0.000438455 | 0.005491602 | 4 | 6 | 2.5    | 50          | 47.5         | 3.380188914  | 4.33922564  | Higher in TRIM24 | 4     | 2     | 4    | 0     | 2    | 47   | 180  | 1    | 42   | 28    |
| ENSMUSG00000042501.12 | Cpa6           | 0.000440542 | 0.00550868  | 4 | 6 | 111.75 | 17.6666667  | 94.08333333  | 2.754352564  | 3.125733746 | Higher in Normal | 170   | 48    | 109  | 120   | 3    | 2    | 6    | 0    | 48   | 47    |
| ENSMUSG00000026069.13 | Il1r1          | 0.000441757 | 0.005521596 | 4 | 6 | 123.5  | 2556.333333 | 2432.8333333 | 3.031663579  | 3.607153834 | Higher in TRIM24 | 160   | 121   | 101  | 112   | 75   | 57   | 722  | 1708 | 198  | 12578 |
| ENSMUSG00000097527.2  | 17001121161rik | 0.000456875 | 0.005694206 | 4 | 6 | 44     | 6.833333333 | 37.16666667  | 2.628218055  | 2.948616692 | Higher in Normal | 92    | 53    | 25   | 6     | 4    | 5    | 3    | 1    | 19   | 9     |
| ENSMUSG00000084935.1  | Gm14161        | 0.000462216 | 0.00575135  | 4 | 6 | 14.5   | 0.66666667  | 13.83333333  | 3.377269611  | 4.283790927 | Higher in Normal | 6     | 1     | 22   | 29    | 1    | 0    | 0    | 1    | 2    | 0     |
| ENSMUSG00000110462.1  | Gm35572        | 0.000464409 | 0.005773921 | 4 | 6 | 93     | 7           | 86           | 3.604687285  | 4.733831944 | Higher in Normal | 55    | 306   | 9    | 2     | 1    | 2    | 0    | 0    | 6    | 33    |
| ENSMUSG00000021208.9  | lfl2712b       | 0.000468202 | 0.005816329 | 4 | 6 | 15.75  | 2.333333333 | 13.41666667  | 2.6511444    | 2.988365839 | Higher in Normal | 34    | 16    | 4    | 9     | 1    | 1    | 1    | 2    | 5    | 4     |
| ENSMUSG00000091269.2  | Gm6682         | 0.000469333 | 0.005820879 | 4 | 6 | 32.5   | 267.6666667 | 235.1666667  | 2.795434979  | 3.218500838 | Higher in TRIM24 | 103   | 6     | 12   | 9     | 240  | 362  | 570  | 191  | 195  | 48    |
| ENSMUSG00000101067.1  | Gm29007        | 0.000474921 | 0.005873429 | 4 | 6 | 12.5   | 1.833333333 | 10.66666667  | 2.719660637  | 3.086632883 | Higher in Normal | 25    | 11    | 4    | 10    | 1    | 1    | 1    | 0    | 3    | 5     |
| ENSMUSG00000064140.2  | Trim38         | 0.000476494 | 0.005889338 | 4 | 6 | 11.75  | 1.5         | 10.25        | 2.573895227  | 2.890242532 | Higher in Normal | 15    | 3     | 15   | 14    | 1    | 1    | 2    | 1    | 2    | 1     |
| ENSMUSG00000104554.1  | Gm4610         | 0.000478984 | 0.005890286 | 4 | 6 | 8      | 134.8333333 | 126.8333333  | 3.249862328  | 4.05172304  | Higher in TRIM24 | 12    | 9     | 4    | 7     | 6    | 318  | 2    | 8    | 256  | 219   |
| ENSMUSG00000042784.9  | Muc1           | 0.000479517 | 0.005913462 | 4 | 6 | 2918   | 354.1666667 | 2563.8333333 | 2.724804167  | 3.08987002  | Higher in Normal | 699   | 928   | 4535 | 5510  | 389  | 46   | 124  | 34   | 1334 | 198   |
| ENSMUSG00000079497.4  | Gm13420        | 0.000487755 | 0.005939205 | 4 | 6 | 32.25  | 3.66666667  | 28.58333333  | 3.116237454  | 3.71864078  | Higher in Normal | 9     | 24    | 6    | 2     | 0    | 0    | 0    | 1    | 4    | 15    |
| ENSMUSG00000084939.2  | Gm830          | 0.000488127 | 0.00599536  | 4 | 6 | 14.25  | 1.333333333 | 12.91666667  | 2.992782696  | 3.531561345 | Higher in Normal | 9     | 19    | 19   | 10    | 1    | 0    | 2    | 0    | 5    | 0     |
| ENSMUSG00000064193.8  | Gm4735         | 0.000489831 | 0.006004179 | 4 | 6 | 176    | 2934.5      | 2758.5       | 3.176300676  | 3.896938956 | Higher in TRIM24 | 623   | 27    | 21   | 33    | 1320 | 2147 | 1757 | 4368 | 37   | 7953  |
| ENSMUSG00000035296.13 | Sgag           | 0.000490224 | 0.006006547 | 4 | 6 | 550.5  | 46.33333333 | 504.1666667  | 3.218003132  | 3.908136289 | Higher in Normal | 1197  | 973   | 19   | 13    | 20   | 12   | 102  | 3    | 97   | 44    |
| ENSMUSG00000036578.7  | Fxyd7          | 0.000492045 | 0.006024045 | 4 | 6 | 38.75  | 7.66666667  | 31.08333333  | 2.343318627  | 2.56247418  | Higher in Normal | 47    | 68    | 14   | 26    | 2    | 1    | 15   | 8    | 9    | 11    |
| ENSMUSG00000030406.7  | Gjpr           | 0.000499558 | 0.006097236 | 4 | 6 | 116.25 | 22.83333333 | 93.41666667  | 2.429981464  | 2.677246249 | Higher in Normal | 189   | 200   | 56   | 20    | 9    | 15   | 4    | 15   | 52   | 42    |
| ENSMUSG00000032191.5  | Bcl2l10        | 0.00050438  | 0.006142943 | 4 | 6 | 30     | 1.16666667  | 28.83333333  | 3.705839284  | 5.103430661 | Higher in Normal | 96    | 21    | 3    | 0     | 2    | 0    | 0    | 0    | 2    | 3     |
| ENSMUSG00000037887.11 | Dusp8          | 0.000507514 | 0.006173712 | 4 | 6 | 5290   | 668.3333333 | 4621.666667  | 2.555614233  | 2.850048999 | Higher in Normal | 374   | 497   | 9518 | 10771 | 173  | 607  | 1003 | 583  | 425  | 1219  |
| ENSMUSG00000030972.6  | Acsm5          | 0.000510681 | 0.00620479  | 4 | 6 | 141    | 10.66666667 | 130.3333333  | 3.430615253  | 4.347922694 | Higher in Normal | 341   | 205   | 11   | 7     | 1    | 1    | 2    | 0    | 37   | 23    |
| ENSMUSG00000114147.1  | Sic1a3         | 0.000512098 | 0.006217049 |   |   |        |             |              |              |             |                  |       |       |      |       |      |      |      |      |      |       |

|                       |               |             |             |   |   |          |             |              |             |             |                  |       |       |       |       |      |      |      |      |      |       |
|-----------------------|---------------|-------------|-------------|---|---|----------|-------------|--------------|-------------|-------------|------------------|-------|-------|-------|-------|------|------|------|------|------|-------|
| ENSMUSG0000002860.14  | Chodl         | 0.000595464 | 0.007000261 | 4 | 6 | 18.25    | 2.5         | 15.75        | 2.60054502  | 2.930239087 | Higher in Normal | 28    | 10    | 14    | 21    | 0    | 0    | 7    | 2    | 4    | 2     |
| ENSMUSG00000090208.1  | Gm15851       | 0.000601753 | 0.007062815 | 4 | 6 | 37       | 2.666666667 | 34.33333333  | 3.481091807 | 4.516515179 | Higher in Normal | 46    | 96    | 2     | 4     | 1    | 0    | 0    | 0    | 7    | 8     |
| ENSMUSG00000094733.1  | Gm5416        | 0.000602267 | 0.007063876 | 4 | 6 | 2        | 30.5        | 28.5         | 2.908208452 | 3.449161327 | Higher in TRIM24 | 3     | 3     | 2     | 0     | 35   | 1    | 5    | 10   | 41   | 91    |
| ENSMUSG00000071341.4  | Egr4          | 0.000607061 | 0.00710096  | 4 | 6 | 99       | 3.666666667 | 95.33333333  | 3.468725683 | 4.499739133 | Higher in Normal | 10    | 0     | 154   | 232   | 12   | 0    | 4    | 1    | 4    | 1     |
| ENSMUSG00000015653.13 | Steap2        | 0.000611958 | 0.007152744 | 4 | 6 | 688.75   | 4457.333333 | 3768.583333  | 2.396063891 | 2.649007358 | Higher in TRIM24 | 4288  | 408   | 1010  | 909   | 133  | 6664 | 4290 | 1984 | 2094 | 11579 |
| ENSMUSG00000080254.4  | Fam220-ps     | 0.000616118 | 0.007186557 | 4 | 6 | 12.5     | 0.5         | 12           | 3.630998133 | 4.817214969 | Higher in Normal | 4     | 2     | 22    | 22    | 0    | 0    | 0    | 0    | 0    | 3     |
| ENSMUSG00000034918.8  | Chdr2         | 0.000616217 | 0.007186557 | 4 | 6 | 60.5     | 7.333333333 | 53.16666667  | 2.897340616 | 3.379066382 | Higher in Normal | 135   | 5     | 75    | 27    | 3    | 3    | 1    | 0    | 20   | 17    |
| ENSMUSG00000076525.3  | Igkv1-99      | 0.000618045 | 0.007201376 | 4 | 6 | 13       | 0.833333333 | 12.16666667  | 3.254756756 | 4.083315792 | Higher in Normal | 2     | 27    | 10    | 13    | 0    | 1    | 1    | 0    | 3    | 0     |
| ENSMUSG00000008085.18 | Car4          | 0.000621471 | 0.007233391 | 4 | 6 | 836.5    | 159         | 677.5        | 2.363702447 | 2.597705481 | Higher in Normal | 1083  | 1319  | 383   | 561   | 25   | 76   | 341  | 33   | 370  | 109   |
| ENSMUSG00000030544.5  | Mesp1         | 0.000623129 | 0.007240651 | 4 | 6 | 6.75     | 0.5         | 6.25         | 3.172754251 | 3.893677083 | Higher in Normal | 10    | 7     | 7     | 3     | 1    | 0    | 0    | 0    | 1    | 1     |
| ENSMUSG00000073628.8  | Gm10552       | 0.000623284 | 0.007240651 | 4 | 6 | 10.25    | 1.166666667 | 9.083333333  | 2.868315276 | 3.347044977 | Higher in Normal | 17    | 4     | 16    | 4     | 1    | 0    | 2    | 0    | 1    | 3     |
| ENSMUSG00000082658.1  | Fau-ps2       | 0.000630844 | 0.007311734 | 4 | 6 | 206.75   | 14.33333333 | 192.4166667  | 3.505377303 | 4.584248268 | Higher in Normal | 681   | 4     | 139   | 3     | 1    | 3    | 2    | 0    | 20   | 60    |
| ENSMUSG00000039431.6  | Mtmr7         | 0.000634344 | 0.007346716 | 4 | 6 | 1846     | 259.6666667 | 1586.333333  | 2.370389135 | 2.607595504 | Higher in Normal | 371   | 444   | 3316  | 3253  | 614  | 52   | 270  | 199  | 299  | 124   |
| ENSMUSG0000006366.14  | Serpina1a     | 0.000644477 | 0.007431963 | 4 | 6 | 24.25    | 2           | 22.25        | 3.002683514 | 3.582785595 | Higher in Normal | 39    | 12    | 19    | 27    | 0    | 4    | 0    | 0    | 7    | 1     |
| ENSMUSG00000019577.6  | Pdk4          | 0.000650285 | 0.007488605 | 4 | 6 | 24480    | 2470.166667 | 22009.833333 | 2.61985108  | 2.957399004 | Higher in Normal | 3187  | 2942  | 44778 | 47013 | 2256 | 870  | 984  | 6343 | 3077 | 1291  |
| ENSMUSG00000086670.1  | Gm13194       | 0.000656704 | 0.007548251 | 4 | 6 | 22       | 4           | 18           | 2.418893139 | 2.678933504 | Higher in Normal | 32    | 35    | 11    | 10    | 3    | 0    | 2    | 6    | 7    | 2     |
| ENSMUSG00000061947.10 | Serpina10     | 0.000658508 | 0.007563278 | 4 | 6 | 23.25    | 1.833333333 | 21.41666667  | 3.051985787 | 3.662028955 | Higher in Normal | 3     | 3     | 42    | 45    | 1    | 0    | 4    | 0    | 4    | 2     |
| ENSMUSG00000032311.17 | Nrg4          | 0.000661298 | 0.00758674  | 4 | 6 | 711.75   | 80.16666667 | 631.5833333  | 2.919448757 | 3.422308382 | Higher in Normal | 1607  | 1134  | 57    | 49    | 124  | 29   | 19   | 15   | 233  | 61    |
| ENSMUSG00000028977.16 | Cas1          | 0.000662898 | 0.00759234  | 4 | 6 | 2391.25  | 391.5       | 1999.75      | 2.464388853 | 2.737710479 | Higher in Normal | 1071  | 1249  | 3809  | 3436  | 96   | 99   | 207  | 64   | 1666 | 217   |
| ENSMUSG0000004038.9   | Gstm3         | 0.000663059 | 0.007598349 | 4 | 6 | 6.75     | 18          | 0.5          | 3.824210755 | 5.50690824  | Higher in Normal | 46    | 1     | 24    | 1     | 0    | 0    | 0    | 0    | 0    | 3     |
| ENSMUSG00000087361.7  | 610043K17Rik  | 0.000664228 | 0.007606205 | 4 | 6 | 66.5     | 12.33333333 | 54.16666667  | 2.394820756 | 2.64304539  | Higher in Normal | 82    | 83    | 54    | 47    | 25   | 1    | 3    | 2    | 28   | 15    |
| ENSMUSG00000028525.16 | Pde4b         | 0.000668322 | 0.007644276 | 4 | 6 | 12724.75 | 2296.333333 | 10428.41667  | 2.335537283 | 2.563309203 | Higher in Normal | 988   | 1254  | 23718 | 24939 | 1167 | 1108 | 2198 | 908  | 2719 | 5678  |
| ENSMUSG00000085224.2  | Gm13425       | 0.000677001 | 0.007729027 | 4 | 6 | 17.5     | 1.5         | 16           | 3.157262113 | 3.858994532 | Higher in Normal | 30    | 2     | 36    | 2     | 0    | 0    | 1    | 1    | 2    | 5     |
| ENSMUSG00000050556.9  | Kcnb1         | 0.00068361  | 0.007786967 | 4 | 6 | 797.25   | 150.8333333 | 646.4166667  | 2.453824448 | 2.72479822  | Higher in Normal | 1594  | 741   | 486   | 368   | 111  | 40   | 33   | 15   | 529  | 177   |
| ENSMUSG00000087032.1  | Gm13874       | 0.000684431 | 0.007788843 | 4 | 6 | 24       | 4.5         | 19.5         | 2.552358103 | 2.858749534 | Higher in Normal | 37    | 15    | 14    | 30    | 1    | 0    | 3    | 0    | 9    | 14    |
| ENSMUSG00000079017.3  | Ifi2712a      | 0.000684776 | 0.007794419 | 4 | 6 | 23516.75 | 2120.833333 | 21395.91667  | 3.065321026 | 3.679258059 | Higher in Normal | 28818 | 64434 | 322   | 493   | 1396 | 725  | 2217 | 3485 | 2813 | 2089  |
| ENSMUSG00000057802.8  | Gm10030       | 0.000690138 | 0.007840788 | 4 | 6 | 95.75    | 19.16666667 | 76.58333333  | 2.441506256 | 2.707918597 | Higher in Normal | 189   | 74    | 76    | 44    | 22   | 5    | 6    | 0    | 35   | 47    |
| ENSMUSG00000027500.10 | Stmn2         | 0.000698138 | 0.007913961 | 4 | 6 | 214.5    | 3306        | 3091.5       | 3.154787558 | 3.923625407 | Higher in TRIM24 | 217   | 166   | 191   | 284   | 22   | 23   | 3034 | 8895 | 873  | 6989  |
| ENSMUSG00000110195.1  | Pde2a         | 0.00069894  | 0.007918742 | 4 | 6 | 29       | 6.666666667 | 22.33333333  | 2.386053675 | 2.631656695 | Higher in Normal | 44    | 39    | 26    | 7     | 1    | 2    | 2    | 3    | 9    | 23    |
| ENSMUSG00000105802.1  | Gm43012       | 0.00069938  | 0.007918742 | 4 | 6 | 50.25    | 9           | 41.25        | 2.56526388  | 2.882146867 | Higher in Normal | 101   | 38    | 56    | 6     | 3    | 1    | 3    | 3    | 24   | 20    |
| ENSMUSG00000031551.12 | Ido1          | 0.000700933 | 0.007927939 | 4 | 6 | 407      | 48.5        | 358.5        | 2.725859082 | 3.121585788 | Higher in Normal | 74    | 570   | 462   | 522   | 104  | 9    | 31   | 3    | 133  | 11    |
| ENSMUSG00000072944.11 | Nup2cl        | 0.00070144  | 0.007930156 | 4 | 6 | 24       | 3.333333333 | 20.66666667  | 2.516487836 | 2.818845736 | Higher in Normal | 18    | 14    | 31    | 3     | 0    | 2    | 8    | 1    | 8    | 1     |
| ENSMUSG00000053168.5  | 9030619P08Rik | 0.000702619 | 0.007935214 | 4 | 6 | 25.75    | 2           | 23.75        | 3.341959359 | 4.243091143 | Higher in Normal | 69    | 28    | 3     | 3     | 0    | 0    | 0    | 1    | 5    | 6     |
| ENSMUSG00000105954.1  | Gm42793       | 0.000706588 | 0.007977081 | 4 | 6 | 4.5      | 60          | 55.5         | 3.034848473 | 3.693121555 | Higher in TRIM24 | 14    | 1     | 2     | 1     | 37   | 94   | 3    | 6    | 159  | 61    |
| ENSMUSG00000032680.11 | 6820408C15Rik | 0.000707018 | 0.00797898  | 4 | 6 | 68       | 3.333333333 | 31.66666667  | 2.633196635 | 2.982036903 | Higher in Normal | 103   | 7     | 26    | 16    | 2    | 1    | 1    | 4    | 11   | 19    |
| ENSMUSG00000029445.13 | Hpd           | 0.000715333 | 0.008072124 | 4 | 6 | 33.5     | 3.333333333 | 10.16666667  | 3.595038593 | 4.887488516 | Higher in Normal | 180   | 42    | 32    | 0     | 0    | 0    | 1    | 8    | 11   | 11    |
| ENSMUSG00000044787.7  | Spta32        | 0.000718722 | 0.008099058 | 4 | 6 | 17.25    | 2.166666667 | 15.08333333  | 2.920753467 | 3.435810273 | Higher in Normal | 44    | 3     | 15    | 7     | 1    | 1    | 1    | 0    | 1    | 9     |
| ENSMUSG00000030739.18 | Myh14         | 0.000724266 | 0.008146642 | 4 | 6 | 4389.75  | 475.1666667 | 3914.583333  | 2.699923592 | 3.084542871 | Higher in Normal | 1547  | 1642  | 7194  | 7176  | 1252 | 62   | 306  | 55   | 1099 | 77    |
| ENSMUSG00000086876.1  | Gm12828       | 0.000724818 | 0.008146642 | 4 | 6 | 39.75    | 1           | 18.75        | 3.672728256 | 5.115116184 | Higher in Normal | 50    | 20    | 8     | 1     | 0    | 0    | 0    | 0    | 0    | 6     |
| ENSMUSG00000028801.14 | Stpg1         | 0.000726053 | 0.008157514 | 4 | 6 | 14.5     | 7           | 27.5         | 2.44511752  | 2.713461318 | Higher in Normal | 62    | 12    | 38    | 26    | 0    | 1    | 3    | 3    | 13   | 22    |
| ENSMUSG00000110823.1  | Gm36799       | 0.000727176 | 0.008166071 | 4 | 6 | 9        | 0.666666667 | 8.333333333  | 3.134873872 | 3.867815074 | Higher in Normal | 4     | 3     | 7     | 22    | 0    | 1    | 0    | 0    | 1    | 2     |
| ENSMUSG00000087042.1  | Gm11611       | 0.000727351 | 0.008166071 | 4 | 6 | 75.75    | 9           | 66.75        | 2.669578662 | 3.041233369 | Higher in Normal | 86    | 43    | 103   | 71    | 27   | 1    | 2    | 1    | 20   | 3     |
| ENSMUSG00000112292.1  | Gm8275        | 0.000729394 | 0.008176946 | 4 | 6 | 99.75    | 12.5        | 87.25        | 2.749619499 | 3.161455563 | Higher in Normal | 115   | 64    | 96    | 124   | 13   | 2    | 2    | 0    | 51   | 7     |
| ENSMUSG00000089760.1  | D030046N08Rik | 0.000737107 | 0.008239146 | 4 | 6 | 11.5     | 0.333333333 | 11.16666667  | 3.677908362 | 5.090537287 | Higher in Normal | 36    | 1     | 8     | 1     | 0    | 0    | 0    | 0    | 1    | 1     |
| ENSMUSG00000046764.8  | A530053G22Rik | 0.000738597 | 0.00824974  | 4 | 6 | 48.1     | 23.5        | 457.5        | 3.546982643 | 4.757159654 | Higher in Normal | 1020  | 898   | 4     | 2     | 35   | 2    | 7    | 0    | 74   | 23    |
| ENSMUSG00000101157.1  | Gm32507       | 0.000742903 | 0.00829176  | 4 | 6 | 18.5     | 1.166666667 | 17.33333333  | 3.317987699 | 4.244629385 | Higher in Normal | 41    | 30    | 3     | 0     | 2    | 1    | 1    | 0    | 1    | 2     |
| ENSMUSG00000074417.9  | Gm14548       | 0.000750823 | 0.008368136 | 4 | 6 | 23.75    | 162.6666667 | 138.9166667  | 2.438336697 | 2.719825584 | Higher in TRIM24 | 63    | 7     | 22    | 3     | 64   | 199  | 230  | 29   | 244  | 210   |
| ENSMUSG00000090223.1  | Pcp4          | 0.000752731 | 0.008383012 | 4 | 6 | 17.25    | 1.166666667 | 15.58333333  | 2.862332031 | 3.366044137 | Higher in Normal | 4     | 15    | 14    | 36    | 0    | 0    | 1    | 5    | 1    | 3     |
| ENSMUSG00000074637.7  | Sox2          | 0.000754808 | 0.00840307  | 4 | 6 | 10.75    | 32.83333333 | 31.08333333  | 3.25506537  | 4.172328693 | Higher in TRIM24 | 13    | 6     | 14    | 10    | 128  | 5    | 8    | 159  | 1    | 1636  |
| ENSMUSG00000018566.14 | Slc2a4        | 0.000755354 | 0.008405021 | 4 | 6 | 3572.5   | 381.6666667 | 319.8333333  | 2.949414282 | 3.489695932 | Higher in TRIM24 | 7902  | 4768  | 738   | 882   | 300  | 141  | 160  | 12   | 1598 | 70    |
| ENSMUSG00000102301.1  | Ighv8-2       | 0.00076504  | 0.008485948 | 4 | 6 | 8.75     | 0.166666667 | 6.583333333  | 3.70170388  | 5.157210654 | Higher in Normal | 25    | 3     | 6     | 1     | 0    | 0    | 0    | 0    | 0    | 1     |
| ENSMUSG00000083670.1  | Gm6829        | 0.000770433 | 0.00853334  | 4 | 6 | 27.75    | 3.333333333 | 24.41666667  | 2.690682038 | 3.079181684 | Higher in Normal | 3     | 3     | 54    | 5     | 1    | 2    | 1    | 0    | 4    | 7     |
| ENSMUSG00000095197.6  | Ighv1-59      | 0.000772137 | 0.008545997 | 4 | 6 | 1.75     | 0.333333333 | 7.166666667  | 3.426529288 | 4.491519371 | Higher in Normal | 1     | 13    | 9     | 7     | 1    | 0    | 0    | 0    | 0    | 1     |
| ENSMUSG00000043629.12 | 1700019D03Rik | 0.000776258 | 0.008567638 | 4 | 6 | 285      | 37.5        | 247.5        | 2.545697234 | 2.862373946 | Higher in Normal | 214   | 180   | 316   | 430   | 127  | 3    | 15   | 5    | 52   | 23    |
| ENSMUSG00000037541.21 | Shank2        | 0.000786532 | 0.008651847 | 4 | 6 | 1803.5   | 225.5       | 1578         | 2.577712379 | 2.909220996 | Higher in Normal | 661   | 432   | 3644  | 2477  | 426  |      |      |      |      |       |

|                       |               |             |             |   |   |         |              |              |             |                  |                  |       |       |       |       |      |      |       |      |      |       |
|-----------------------|---------------|-------------|-------------|---|---|---------|--------------|--------------|-------------|------------------|------------------|-------|-------|-------|-------|------|------|-------|------|------|-------|
| ENSMUSG00000019122.8  | Ccl9          | 0.000882159 | 0.009421253 | 4 | 6 | 951.75  | 7561.5       | 6609.75      | 2.343589191 | 2.595724969      | Higher in TRIM24 | 951   | 2263  | 261   | 332   | 1494 | 4349 | 14558 | 3891 | 2525 | 18552 |
| ENSMUSG0000007665.4   | Ighv7-1       | 0.00088479  | 0.009446035 | 4 | 6 | 8.25    | 0.5          | 7.75         | 3.094367135 | 3.91154          | Higher in Normal | 4     | 4     | 9     | 16    | 0    | 1    | 1     | 1    | 0    | 0     |
| ENSMUSG00000108255.1  | Gm16499       | 0.00089206  | 0.009500332 | 4 | 6 | 25.75   | 2.5          | 23.25        | 2.987137346 | 3.591458882      | Higher in Normal | 32    | 53    | 9     | 6     | 0    | 1    | 1     | 0    | 7    | 1     |
| ENSMUSG00000047013.15 | Fbxo41        | 0.000901479 | 0.009555206 | 4 | 6 | 70.75   | 12.33333333  | 58.41666667  | 2.625109087 | 2.988609661      | Higher in Normal | 155   | 19    | 81    | 28    | 2    | 6    | 0     | 4    | 18   | 44    |
| ENSMUSG00000103935.1  | AY702102      | 0.000901549 | 0.009555206 | 4 | 6 | 7.75    | 0.16666667   | 7.583333333  | 3.558765062 | 4.91896094       | Higher in Normal | 14    | 4     | 12    | 1     | 0    | 0    | 0     | 0    | 1    | 0     |
| ENSMUSG00000110331.1  | Nudc-ps1      | 0.000901606 | 0.009555206 | 4 | 6 | 47.25   | 376          | 328.75       | 2.337888319 | 2.589695299      | Higher in TRIM24 | 69    | 97    | 9     | 14    | 97   | 137  | 345   | 461  | 139  | 1077  |
| ENSMUSG00000087382.7  | Ctcflos       | 0.000902079 | 0.009556892 | 4 | 6 | 466.25  | 35.66666667  | 430.5833333  | 3.364641857 | 4.355115436      | Higher in Normal | 812   | 1012  | 26    | 15    | 23   | 4    | 0     | 1    | 105  | 81    |
| ENSMUSG00000100672.1  | Gm28404       | 0.000903351 | 0.009567039 | 4 | 6 | 0       | 13.66666667  | 13.66666667  | 3.761082899 | 5.702159907      | Higher in TRIM24 | 0     | 0     | 0     | 0     | 17   | 1    | 0     | 0    | 2    | 12    |
| ENSMUSG00000084853.1  | Mm11791       | 0.000913375 | 0.009656548 | 4 | 6 | 10.25   | 0.5          | 9.75         | 3.411611529 | 4.44939674       | Higher in Normal | 21    | 1     | 15    | 4     | 0    | 0    | 0     | 0    | 2    | 1     |
| ENSMUSG00000026650.15 | Meig1         | 0.000913389 | 0.009656548 | 4 | 6 | 12.25   | 2.16666667   | 10.08333333  | 2.460972612 | 2.752643882      | Higher in Normal | 17    | 6     | 11    | 15    | 0    | 0    | 0     | 1    | 3    | 2     |
| ENSMUSG000000022894.5 | Adamt5        | 0.000915664 | 0.009676993 | 4 | 6 | 6836.5  | 1470         | 5366.5       | 2.407168835 | 2.676344528      | Higher in Normal | 10830 | 14629 | 954   | 933   | 906  | 255  | 998   | 982  | 2576 | 3103  |
| ENSMUSG00000052188.6  | Gm14964       | 0.000918714 | 0.009702739 | 4 | 6 | 60.75   | 12.16666667  | 48.58333333  | 2.644683252 | 3.018104662      | Higher in Normal | 86    | 108   | 21    | 28    | 4    | 0    | 3     | 2    | 22   | 42    |
| ENSMUSG00000073414.8  | Mpij6b        | 0.000921612 | 0.009723225 | 4 | 6 | 38.5    | 6.833333333  | 31.66666667  | 2.453816396 | 2.741779053      | Higher in Normal | 29    | 43    | 45    | 37    | 2    | 3    | 2     | 0    | 26   | 8     |
| ENSMUSG00000028386.1  | Slc46a2       | 0.00092503  | 0.009742415 | 4 | 6 | 117.75  | 21           | 96.75        | 2.786963505 | 3.241323091      | Higher in Normal | 204   | 131   | 76    | 60    | 2    | 3    | 3     | 0    | 35   | 83    |
| ENSMUSG00000070504.9  | Fcr1b         | 0.000926882 | 0.009754292 | 4 | 6 | 4.5     | 58.33333333  | 53.83333333  | 2.960674496 | 3.597114782      | Higher in TRIM24 | 8     | 4     | 6     | 0     | 1    | 60   | 107   | 6    | 121  | 55    |
| ENSMUSG00000091297.1  | Gm8439        | 0.000927933 | 0.009756114 | 4 | 6 | 36      | 6            | 6.5          | 2.437324642 | 2.719092467      | Higher in Normal | 73    | 11    | 31    | 29    | 6    | 3    | 1     | 0    | 16   | 13    |
| ENSMUSG00000096638.2  | Ighv2-9       | 0.000930948 | 0.009781058 | 4 | 6 | 68      | 8.833333333  | 59.16666667  | 2.584365133 | 2.933011167      | Higher in Normal | 10    | 62    | 96    | 104   | 8    | 1    | 31    | 2    | 3    | 8     |
| ENSMUSG00000111086.1  | Gm48671       | 0.000938162 | 0.009846655 | 4 | 6 | 28      | 4.66666667   | 23.33333333  | 2.38174189  | 2.645365279      | Higher in Normal | 20    | 30    | 28    | 34    | 13   | 0    | 2     | 1    | 8    | 4     |
| ENSMUSG00000015787.15 | Abo           | 0.000938701 | 0.009848925 | 4 | 6 | 7.5     | 0.333333333  | 7.16666667   | 3.327315614 | 4.285824166      | Higher in Normal | 6     | 3     | 11    | 10    | 0    | 0    | 0     | 0    | 2    | 0     |
| ENSMUSG00000107624.4  | Gm44005       | 0.000939305 | 0.009850182 | 4 | 6 | 275.5   | 40.83333333  | 234.6666667  | 2.90834323  | 3.447288375      | Higher in Normal | 376   | 681   | 24    | 21    | 14   | 2    | 8     | 13   | 97   | 111   |
| ENSMUSG00000085657.7  | Gm15984       | 0.000939468 | 0.009850182 | 4 | 6 | 23      | 3.5          | 19.5         | 2.824224074 | 3.302247171      | Higher in Normal | 53    | 24    | 7     | 8     | 1    | 0    | 2     | 0    | 6    | 12    |
| ENSMUSG00000106073.1  | Gm42892       | 0.000957532 | 0.010001693 | 4 | 6 | 156.5   | 26.83333333  | 129.6666667  | 2.644093039 | 3.023517588      | Higher in Normal | 176   | 390   | 36    | 24    | 22   | 11   | 2     | 7    | 67   | 52    |
| ENSMUSG00000022622.4  | Acr           | 0.000960175 | 0.01002586  | 4 | 6 | 25.5    | 4.333333333  | 21.16666667  | 2.546874339 | 2.881858026      | Higher in Normal | 43    | 42    | 11    | 6     | 1    | 1    | 1     | 5    | 10   | 8     |
| ENSMUSG00000051251.3  | Nhlh1         | 0.000974546 | 0.010161982 | 4 | 6 | 28.75   | 2.833333333  | 25.91666667  | 3.095741531 | 3.801316198      | Higher in Normal | 87    | 2     | 24    | 2     | 2    | 1    | 0     | 0    | 2    | 11    |
| ENSMUSG00000101206.1  | Gm5266        | 0.000977111 | 0.010181753 | 4 | 6 | 18.75   | 1.333333333  | 17.41666667  | 3.376290403 | 4.41476681       | Higher in Normal | 51    | 2     | 19    | 3     | 0    | 0    | 0     | 0    | 2    | 6     |
| ENSMUSG00000054613.9  | Chrm2         | 0.000977675 | 0.010184139 | 4 | 6 | 16.25   | 2.16666667   | 14.08333333  | 2.919290806 | 3.460201896      | Higher in Normal | 12    | 11    | 25    | 17    | 0    | 0    | 0     | 0    | 3    | 10    |
| ENSMUSG00000109097.7  | Gm29683       | 0.000979611 | 0.010197333 | 4 | 6 | 25.25   | 3.66666667   | 21.58333333  | 2.872820543 | 3.390324426      | Higher in Normal | 61    | 19    | 15    | 6     | 1    | 2    | 0     | 0    | 0    | 16    |
| ENSMUSG00000050138.7  | Kcnk12        | 0.000986736 | 0.010257475 | 4 | 6 | 3.75    | 63.5         | 59.75        | 3.272720216 | 4.320285407      | Higher in TRIM24 | 5     | 7     | 0     | 3     | 1    | 213  | 95    | 7    | 55   | 10    |
| ENSMUSG00000023132.7  | Gzma          | 0.000996959 | 0.010331742 | 4 | 6 | 249.5   | 38.33333333  | 211.1666667  | 2.533946107 | 2.862429094      | Higher in Normal | 467   | 267   | 102   | 162   | 6    | 4    | 49    | 32   | 129  | 10    |
| ENSMUSG00000034923.9  | Ily6g6f       | 0.001002935 | 0.01038332  | 4 | 6 | 13      | 1            | 12           | 3.202936348 | 4.052518093      | Higher in Normal | 33    | 3     | 14    | 2     | 1    | 0    | 0     | 1    | 0    | 4     |
| ENSMUSG00000036570.14 | Fxyd1         | 0.001003334 | 0.010383926 | 4 | 6 | 1738    | 319.3333333  | 1418.666667  | 2.418043819 | 2.696851663      | Higher in Normal | 2884  | 3453  | 246   | 369   | 128  | 145  | 630   | 122  | 638  | 253   |
| ENSMUSG00000061100.3  | Retnla        | 0.001004773 | 0.010388784 | 4 | 6 | 3753.5  | 328.8333333  | 3424.666667  | 3.085448997 | 3.781122912      | Higher in Normal | 3981  | 10789 | 91    | 153   | 161  | 31   | 873   | 199  | 634  | 75    |
| ENSMUSG00000097326.1  | A330048009Rik | 0.001006599 | 0.010401773 | 4 | 6 | 23      | 2.333333333  | 20.66666667  | 2.830892271 | 3.334282928      | Higher in Normal | 13    | 6     | 28    | 45    | 7    | 0    | 0     | 0    | 3    | 4     |
| ENSMUSG00000054083.8  | Capn12        | 0.001007108 | 0.010410173 | 4 | 6 | 108     | 102.16666667 | 85.83333333  | 2.363904891 | 2.621258764      | Higher in Normal | 156   | 88    | 101   | 87    | 23   | 2    | 2     | 3    | 62   | 41    |
| ENSMUSG00000086545.4  | Lrrc3c        | 0.001009283 | 0.010420699 | 4 | 6 | 17.5    | 0            | 17.5         | 3.894062056 | 6.603212034      | Higher in Normal | 48    | 1     | 22    | 0     | 0    | 0    | 0     | 0    | 0    | 0     |
| ENSMUSG00000095338.1  | Igkv3-9       | 0.001017411 | 0.010490393 | 4 | 6 | 6.75    | 0.16666667   | 6.583333333  | 3.541156262 | 4.812286985      | Higher in Normal | 1     | 13    | 5     | 8     | 0    | 0    | 0     | 0    | 0    | 1     |
| ENSMUSG00000070495.11 | Ctcf1         | 0.001021496 | 0.010523241 | 4 | 6 | 128.25  | 11.66666667  | 116.5833333  | 3.312431697 | 4.267550584      | Higher in Normal | 229   | 250   | 24    | 10    | 1    | 1    | 0     | 0    | 29   | 39    |
| ENSMUSG00000025020.11 | Slit1         | 0.001022533 | 0.010528843 | 4 | 6 | 44.75   | 294.8333333  | 250.0833333  | 2.590924106 | 2.967682749      | Higher in TRIM24 | 125   | 9     | 29    | 16    | 74   | 677  | 471   | 169  | 282  | 96    |
| ENSMUSG00000054855.13 | Rnd1          | 0.001031532 | 0.010609284 | 4 | 6 | 2776.25 | 405          | 2371.25      | 2.366723426 | 2.627052986      | Higher in Normal | 372   | 158   | 4679  | 5896  | 98   | 361  | 534   | 331  | 532  | 574   |
| ENSMUSG00000112489.1  | 9230116L04Rik | 0.001032157 | 0.010609284 | 4 | 6 | 48.75   | 10.16666667  | 38.58333333  | 2.385519417 | 2.651958725      | Higher in Normal | 97    | 11    | 54    | 33    | 2    | 6    | 1     | 2    | 17   | 33    |
| ENSMUSG00000032515.8  | Csrnp1        | 0.00104775  | 0.010737758 | 4 | 6 | 11307.5 | 1359.5       | 9948         | 2.608702369 | 2.977105116      | Higher in Normal | 356   | 293   | 20437 | 24144 | 1242 | 542  | 1657  | 911  | 1551 | 2254  |
| ENSMUSG00000109056.1  | A630009H07Rik | 0.001057608 | 0.010824215 | 4 | 6 | 10      | 1            | 9            | 3.071022332 | 3.766486112      | Higher in Normal | 20    | 5     | 0     | 5     | 0    | 0    | 0     | 0    | 2    | 4     |
| ENSMUSG00000104077.1  | Gm37027       | 0.001064736 | 0.010893509 | 4 | 6 | 11.75   | 1.833333333  | 9.916666667  | 2.582800347 | 2.945897592      | Higher in Normal | 23    | 12    | 7     | 5     | 1    | 0    | 1     | 1    | 5    | 3     |
| ENSMUSG00000070933.10 | Speer4d       | 0.001072505 | 0.010947246 | 4 | 6 | 10.75   | 1.166666667  | 9.583333333  | 3.015292225 | 3.658821282      | Higher in Normal | 19    | 4     | 8     | 12    | 0    | 0    | 0     | 0    | 2    | 5     |
| ENSMUSG00000031936.9  | Heph1         | 0.001074762 | 0.010960273 | 4 | 6 | 219     | 31           | 188          | 2.804751715 | 3.288700735      | Higher in Normal | 949   | 23    | 175   | 129   | 9    | 3    | 5     | 1    | 94   | 74    |
| ENSMUSG00000024990.12 | Rbp4          | 0.001077788 | 0.010977444 | 4 | 6 | 4092.5  | 305.6666667  | 3786.8333333 | 3.226252803 | 4.08724492       | Higher in Normal | 5938  | 6314  | 49    | 69    | 355  | 8    | 84    | 86   | 1131 | 170   |
| ENSMUSG00000076562.1  | Igkv4-50      | 0.001093186 | 0.011133633 | 4 | 6 | 15.25   | 1.333333333  | 13.91666667  | 2.959423239 | 3.589286622      | Higher in Normal | 2     | 21    | 18    | 20    | 0    | 4    | 2     | 0    | 2    | 0     |
| ENSMUSG00000102319.1  | Gm37626       | 0.001095865 | 0.011133437 | 4 | 6 | 62.5    | 10.83333333  | 51.66666667  | 3.200167778 | Higher in Normal | 65               | 166   | 13    | 6     | 7     | 3    | 2    | 1     | 18   | 34   |       |
| ENSMUSG00000040016.16 | Ptger3        | 0.001105421 | 0.011204344 | 4 | 6 | 1101.5  | 157.6666667  | 943.8333333  | 2.699572749 | 3.122414882      | Higher in Normal | 3126  | 1040  | 118   | 122   | 57   | 32   | 140   | 42   | 557  | 118   |
| ENSMUSG00000066392.11 | Nrxn3         | 0.001106703 | 0.011209878 | 4 | 6 | 227     | 42           | 185          | 2.742247049 | 3.189776364      | Higher in Normal | 473   | 339   | 72    | 24    | 15   | 3    | 11    | 2    | 72   | 149   |
| ENSMUSG00000015829.13 | Tnr           | 0.001111598 | 0.011239328 | 4 | 6 | 60      | 12           | 48           | 2.501492105 | 2.819344996      | Higher in Normal | 61    | 23    | 103   | 53    | 1    | 0    | 5     | 2    | 23   | 41    |
| ENSMUSG00000037989.15 | Wnk2          | 0.001141587 | 0.011504911 | 4 | 6 | 2392.25 | 205.1666667  | 2187.083333  | 3.012027204 | 3.663913684      | Higher in Normal | 699   | 671   | 4306  | 3893  | 40   | 22   | 44    | 4    | 1083 | 38    |
| ENSMUSG00000096878.2  | Gm21083       | 0.00114189  | 0.011504911 | 4 | 6 | 27.5    | 4            | 23.5         | 2.846421076 | 3.356349786      | Higher in Normal | 10    | 12    | 39    | 49    | 0    | 0    | 2     | 0    | 3    | 19    |
| ENSMUSG00000040490.4  | Lfn2          | 0.001142184 | 0.011504911 | 4 | 6 | 9.25    | 1.166666667  | 8.083333333  | 2.849800903 | 3.383494479      | Higher in Normal | 13    | 14    | 5     | 5     | 0    | 0    | 1     | 0    | 3    | 3     |
| ENSMUSG00000041737.8  | Tmem45b       | 0.001142254 | 0.011504911 | 4 | 6 | 3341.5  | 220          | 3121.5       | 3.353265671 | 4.406545378      | Higher in Normal | 3886  | 9367  | 59    | 54    | 135  | 12   | 35    | 8    | 1077 | 53    |

|                       |                |             |             |   |   |         |              |              |              |             |                  |      |      |       |       |      |       |       |      |       |       |
|-----------------------|----------------|-------------|-------------|---|---|---------|--------------|--------------|--------------|-------------|------------------|------|------|-------|-------|------|-------|-------|------|-------|-------|
| ENSMUSG00000025105.9  | Bnc1           | 0.001331213 | 0.013024672 | 4 | 6 | 92      | 974.5        | 882.5        | 2.792268699  | 3.333385402 | Higher in TRIM24 | 11   | 86   | 134   | 137   | 160  | 2066  | 353   | 60   | 58    | 3150  |
| ENSMUSG00000027270.14 | Lamp5          | 0.001334942 | 0.013048574 | 4 | 6 | 22.25   | 2            | 20.25        | 3.117194493  | 3.899590529 | Higher in Normal | 7    | 3    | 28    | 51    | 0    | 0     | 0     | 0    | 4     | 8     |
| ENSMUSG00000055125.7  | M5C100018Rrik  | 0.001337286 | 0.013056726 | 4 | 6 | 6.75    | 0.166666667  | 6.583333333  | 3.397758734  | 4.634440954 | Higher in Normal | 8    | 1    | 12    | 6     | 0    | 0     | 0     | 0    | 1     | 0     |
| ENSMUSG00000057723.3  | Krt33b         | 0.001338053 | 0.013056726 | 4 | 6 | 11.25   | 0            | 11.25        | 3.726461443  | 5.833405281 | Higher in Normal | 13   | 0    | 17    | 15    | 0    | 0     | 0     | 0    | 0     | 0     |
| ENSMUSG00000108308.1  | Gm45218        | 0.001338499 | 0.013056726 | 4 | 6 | 22.25   | 3.166666667  | 19.083333333 | 2.819979698  | 3.345917306 | Higher in Normal | 45   | 32   | 11    | 0     | 1    | 1     | 1     | 2    | 4     | 11    |
| ENSMUSG00000026725.17 | Tnn            | 0.001339797 | 0.013066665 | 4 | 6 | 76      | 819.6666667  | 743.6666667  | 2.754886324  | 3.267692397 | Higher in TRIM24 | 152  | 14   | 79    | 59    | 7    | 91    | 2368  | 215  | 1140  | 1097  |
| ENSMUSG00000110816.1  | Gm19178        | 0.001340566 | 0.013069979 | 4 | 6 | 38      | 4            | 34           | 2.796815584  | 3.312382495 | Higher in Normal | 110  | 1    | 39    | 3     | 6    | 3     | 2     | 2    | 5     | 6     |
| ENSMUSG00000039438.7  | Ttcb3          | 0.001345747 | 0.01310379  | 4 | 6 | 20      | 2.166666667  | 17.833333333 | 2.786375006  | 3.300255968 | Higher in Normal | 25   | 30   | 11    | 14    | 5    | 0     | 3     | 0    | 5     | 0     |
| ENSMUSG00000112026.1  | Gm6653         | 0.001345755 | 0.01310379  | 4 | 6 | 1.5     | 16.833333333 | 15.333333333 | 2.743736768  | 3.259566491 | Higher in TRIM24 | 2    | 0    | 3     | 1     | 7    | 1     | 5     | 25   | 12    | 51    |
| ENSMUSG00000032978.14 | Guca2b         | 0.001348149 | 0.01312129  | 4 | 6 | 8       | 0.666666667  | 7.333333333  | 2.949942783  | 3.619926886 | Higher in Normal | 10   | 7    | 8     | 7     | 2    | 0     | 0     | 0    | 2     | 0     |
| ENSMUSG00000094417.1  | Gm13243        | 0.001348767 | 0.013124719 | 4 | 6 | 15.75   | 2.5          | 13.25        | 2.666685122  | 3.091542125 | Higher in Normal | 40   | 9    | 10    | 4     | 1    | 1     | 0     | 0    | 1     | 3     |
| ENSMUSG00000018927.3  | Ccl6           | 0.001352589 | 0.013146901 | 4 | 6 | 1098    | 9761.5       | 8663.5       | 2.430340079  | 2.746869433 | Higher in TRIM24 | 1016 | 2940 | 183   | 253   | 2731 | 7507  | 19240 | 1976 | 4959  | 22156 |
| ENSMUSG00000097293.1  | D630002J18Rrik | 0.001354082 | 0.013155419 | 4 | 6 | 12.5    | 1.166666667  | 7.083333333  | 2.544338471  | 2.922419166 | Higher in Normal | 12   | 9    | 4     | 8     | 2    | 1     | 1     | 0    | 2     | 1     |
| ENSMUSG00000073209.4  | Klf14          | 0.001356176 | 0.013167365 | 4 | 6 | 82.75   | 12.833333333 | 69.916666667 | 2.865649465  | 3.423389642 | Higher in Normal | 128  | 187  | 13    | 3     | 4    | 1     | 6     | 1    | 24    | 41    |
| ENSMUSG000001109552.1 | Gm45012        | 0.001369325 | 0.013273861 | 4 | 6 | 8       | 0.333333333  | 7.666666667  | 3.322746619  | 4.472488964 | Higher in Normal | 18   | 4    | 9     | 1     | 1    | 0     | 0     | 0    | 1     | 0     |
| ENSMUSG00000074003.4  | Gucy2d         | 0.001374238 | 0.013305892 | 4 | 6 | 17.5    | 2            | 15.5         | 2.955497446  | 3.594860202 | Higher in Normal | 46   | 5    | 17    | 2     | 0    | 1     | 2     | 0    | 1     | 8     |
| ENSMUSG00000046450.3  | Olfcr71        | 0.001374377 | 0.013305892 | 4 | 6 | 20.5    | 1.833333333  | 18.666666667 | 3.132215625  | 3.949783807 | Higher in Normal | 54   | 3    | 23    | 2     | 1    | 0     | 0     | 0    | 4     | 6     |
| ENSMUSG00000024125.1  | Sbp1           | 0.001378068 | 0.013328912 | 4 | 6 | 8.5     | 0.666666667  | 7.833333333  | 3.116367344  | 4.023249254 | Higher in Normal | 5    | 22   | 4     | 3     | 0    | 1     | 0     | 1    | 0     | 2     |
| ENSMUSG00000086961.1  | Gm12946        | 0.001383177 | 0.013369834 | 4 | 6 | 40.5    | 0.666666667  | 33.833333333 | 2.584672361  | 2.962128975 | Higher in Normal | 65   | 6    | 54    | 37    | 3    | 1     | 1     | 0    | 18    | 17    |
| ENSMUSG00000021499.12 | Catsp3r        | 0.001385049 | 0.013379443 | 4 | 6 | 27.25   | 4.166666667  | 23.083333333 | 2.658935392  | 3.084237815 | Higher in Normal | 79   | 11   | 15    | 4     | 3    | 2     | 0     | 3    | 3     | 14    |
| ENSMUSG00000097666.1  | A330094K24Rrik | 0.001391659 | 0.013421193 | 4 | 6 | 12      | 0.666666667  | 11.34231993  | 3.33944961   | 4.477293728 | Higher in Normal | 25   | 17   | 6     | 0     | 0    | 0     | 1     | 0    | 2     | 1     |
| ENSMUSG00000020673.14 | Tpo            | 0.001400667 | 0.01349027  | 4 | 6 | 26.5    | 2.666666667  | 23.833333333 | 2.923144447  | 3.544050149 | Higher in Normal | 68   | 6    | 19    | 13    | 0    | 3     | 0     | 0    | 8     | 5     |
| ENSMUSG00000080078.2  | Gm15583        | 0.001408168 | 0.013583337 | 4 | 6 | 1.5     | 21.333333333 | 19.833333333 | 2.929919628  | 3.633542214 | Higher in TRIM24 | 6    | 0    | 0     | 0     | 29   | 18    | 8     | 2    | 28    | 43    |
| ENSMUSG00000065799.1  | Gm25517        | 0.001415979 | 0.013600544 | 4 | 6 | 9.75    | 1.666666667  | 8.083333333  | 2.4442543765 | 2.757074708 | Higher in Normal | 4    | 9    | 16    | 10    | 0    | 2     | 1     | 3    | 4     | 4     |
| ENSMUSG00000110646.1  | Olfcr369-ps1   | 0.001421708 | 0.013646961 | 4 | 6 | 3.75    | 28.5         | 24.75        | 2.381103315  | 2.685768122 | Higher in TRIM24 | 2    | 8    | 2     | 3     | 2    | 17    | 46    | 27   | 13    | 66    |
| ENSMUSG00000084512.1  | Gm22482        | 0.001430851 | 0.01372175  | 4 | 6 | 12      | 0.166666667  | 11.833333333 | 3.671307626  | 5.699166878 | Higher in Normal | 29   | 17   | 2     | 0     | 0    | 0     | 0     | 0    | 1     | 0     |
| ENSMUSG00000107956.1  | Speer9-ps1     | 0.001434018 | 0.013743464 | 4 | 6 | 5.5     | 0            | 5.5          | 3.507785255  | 4.961759003 | Higher in Normal | 10   | 5    | 3     | 0     | 0    | 0     | 0     | 0    | 0     | 0     |
| ENSMUSG00000021478.6  | Drtd           | 0.001436191 | 0.013759954 | 4 | 6 | 53      | 11.66666667  | 41.333333333 | 2.411014534  | 2.707197221 | Higher in Normal | 121  | 11   | 46    | 34    | 5    | 1     | 2     | 2    | 19    | 41    |
| ENSMUSG00000086677.1  | Tvp23bos       | 0.001437357 | 0.013766515 | 4 | 6 | 39.25   | 6.333333333  | 32.916666667 | 2.632607771  | 3.0453332   | Higher in Normal | 86   | 58   | 9     | 4     | 8    | 0     | 3     | 5    | 5     | 17    |
| ENSMUSG00000046095.5  | Krt32          | 0.001459097 | 0.013920337 | 4 | 6 | 17      | 1            | 16           | 3.394873598  | 4.621663811 | Higher in Normal | 31   | 0    | 22    | 15    | 0    | 0     | 0     | 0    | 1     | 5     |
| ENSMUSG00000028214.13 | Gem            | 0.001467903 | 0.013980204 | 4 | 6 | 8991.75 | 1234.5       | 7757.25      | 2.792218596  | 3.307815418 | Higher in Normal | 400  | 287  | 16444 | 18836 | 146  | 156   | 916   | 530  | 230   | 5429  |
| ENSMUSG00000054362.9  | Lexm           | 0.001469615 | 0.013987917 | 4 | 6 | 18      | 2.5          | 15.5         | 2.837562278  | 3.382243528 | Higher in Normal | 43   | 9    | 11    | 1     | 0    | 0     | 0     | 0    | 5     | 9     |
| ENSMUSG00000069306.5  | Hist1h4m       | 0.001482769 | 0.01408654  | 4 | 6 | 11.75   | 0.833333333  | 10.916666667 | 3.077039133  | 3.880852912 | Higher in Normal | 1    | 3    | 20    | 23    | 2    | 0     | 1     | 1    | 2     | 0     |
| ENSMUSG00000037053.6  | Azgp1          | 0.001494209 | 0.014164278 | 4 | 6 | 10      | 1.333333333  | 8.666666667  | 2.496988608  | 2.860863485 | Higher in Normal | 16   | 7    | 3     | 1     | 1    | 1     | 0     | 1    | 2     | 0     |
| ENSMUSG00000032087.10 | Dscam1l        | 0.001504807 | 0.014253348 | 4 | 6 | 75.5    | 13.166666667 | 62.333333333 | 2.662287411  | 3.092987177 | Higher in Normal | 221  | 9    | 53    | 19    | 3    | 2     | 4     | 1    | 24    | 45    |
| ENSMUSG00000078249.5  | Hmga1b         | 0.001508092 | 0.014286314 | 4 | 6 | 50.6    | 30.56        | 3050         | 2.569778138  | 2.971065017 | Higher in TRIM24 | 116  | 78   | 79    | 1040  | 1469 | 6917  | 3322  | 68   | 2449  | 7111  |
| ENSMUSG00000021977.11 | 1700129C05Rrik | 0.001508489 | 0.014286314 | 4 | 6 | 16.5    | 1            | 15.5         | 3.410690808  | 4.689645805 | Higher in Normal | 53   | 2    | 10    | 1     | 0    | 0     | 0     | 0    | 1     | 5     |
| ENSMUSG00000020890.11 | Gucy2e         | 0.001510165 | 0.01429329  | 4 | 6 | 55.25   | 10.833333333 | 44.416666667 | 2.565057066  | 2.940507915 | Higher in Normal | 157  | 17   | 38    | 9     | 2    | 3     | 2     | 2    | 15    | 41    |
| ENSMUSG00000097702.1  | Gm26739        | 0.001513419 | 0.014310661 | 4 | 6 | 29.25   | 2.833333333  | 26.416666667 | 3.167805829  | 4.048849908 | Higher in Normal | 76   | 30   | 10    | 1     | 0    | 0     | 1     | 0    | 6     | 10    |
| ENSMUSG00000113925.1  | Gm7544         | 0.001514351 | 0.014310661 | 4 | 6 | 8.25    | 0.166666667  | 8.083333333  | 3.535441858  | 5.001251211 | Higher in Normal | 1    | 12   | 1     | 0     | 0    | 0     | 0     | 0    | 0     | 1     |
| ENSMUSG00000056643.5  | Chst13         | 0.001515193 | 0.014321141 | 4 | 6 | 22      | 200          | 178          | 2.741964583  | 3.26395942  | Higher in TRIM24 | 50   | 18   | 15    | 5     | 7    | 47    | 149   | 675  | 61    | 261   |
| ENSMUSG00000065564.1  | Mirlet7b       | 0.001517188 | 0.01432792  | 4 | 6 | 47      | 8.333333333  | 38.666666667 | 2.497841922  | 2.843368297 | Higher in Normal | 32   | 131  | 10    | 15    | 3    | 3     | 7     | 3    | 25    | 9     |
| ENSMUSG00000022101.5  | Fgf17          | 0.001519038 | 0.014341605 | 4 | 6 | 33.25   | 5.333333333  | 27.916666667 | 2.457032542  | 2.78286304  | Higher in Normal | 63   | 9    | 47    | 14    | 2    | 0     | 1     | 0    | 12    | 9     |
| ENSMUSG00000023467.18 | Tulp2          | 0.001526693 | 0.014395537 | 4 | 6 | 73.25   | 17           | 56.25        | 2.339082471  | 2.609595033 | Higher in Normal | 140  | 18   | 69    | 66    | 8    | 0     | 5     | 4    | 27    | 58    |
| ENSMUSG00000025038.7  | Ehfc2          | 0.001528566 | 0.014404577 | 4 | 6 | 23.75   | 5            | 18.75        | 2.458410558  | 2.780156845 | Higher in Normal | 53   | 21   | 9     | 12    | 1    | 2     | 2     | 2    | 8     | 17    |
| ENSMUSG00000079594.2  | BC117090       | 0.001534374 | 0.014455017 | 4 | 6 | 1.75    | 64.16666667  | 62.416666667 | 3.33166646   | 4.73676546  | Higher in TRIM24 | 7    | 0    | 0     | 62    | 2    | 2     | 4     | 179  | 136   | 136   |
| ENSMUSG00000052229.5  | Gpr17          | 0.001541964 | 0.014501993 | 4 | 6 | 35.75   | 3.333333333  | 32.416666667 | 3.165601736  | 4.052346552 | Higher in Normal | 90   | 42   | 9     | 2     | 0    | 0     | 0     | 0    | 1     | 9     |
| ENSMUSG00000050783.4  | Htr1f          | 0.001549947 | 0.014556691 | 4 | 6 | 16.25   | 2            | 14.25        | 2.865844889  | 3.439282959 | Higher in Normal | 16   | 5    | 28    | 16    | 0    | 0     | 0     | 0    | 5     | 7     |
| ENSMUSG00000096936.1  | Gm3510         | 0.001556769 | 0.014615786 | 4 | 6 | 5.75    | 0.333333333  | 5.416666667  | 3.097463725  | 3.961528634 | Higher in Normal | 8    | 3    | 7     | 5     | 0    | 1     | 0     | 0    | 1     | 0     |
| ENSMUSG00000106445.1  | Gm21190        | 0.001558192 | 0.01462059  | 4 | 6 | 20.75   | 4.5          | 16.25        | 2.332531914  | 2.599071575 | Higher in Normal | 10   | 17   | 26    | 30    | 1    | 0     | 1     | 1    | 10    | 14    |
| ENSMUSG00000108256.1  | Gm43923        | 0.001567956 | 0.01470071  | 4 | 6 | 63.25   | 13.833333333 | 49.416666667 | 2.383131529  | 2.674988685 | Higher in Normal | 67   | 94   | 65    | 27    | 1    | 1     | 5     | 37   | 35    | 35    |
| ENSMUSG00000039691.0  | Tspan10        | 0.001569051 | 0.014708885 | 4 | 6 | 26.5    | 5.5          | 21           | 2.354785086  | 2.633338677 | Higher in Normal | 34   | 8    | 34    | 30    | 0    | 4     | 3     | 0    | 6     | 20    |
| ENSMUSG00000027961.7  | Lrrc39         | 0.001580121 | 0.014780803 | 4 | 6 | 309.25  | 58.5         | 250.75       | 2.473584657  | 2.808404411 | Higher in Normal | 754  | 419  | 40    | 24    | 41   | 21    | 25    | 15   | 146   | 103   |
| ENSMUSG00000042306.11 | S100a14        | 0.001604114 | 0.014986826 | 4 | 6 | 307.5   | 3766.833333  | 3459.333333  | 3.069771302  | 3.947635096 | Higher in TRIM24 | 80   | 154  | 392   | 604   | 957  | 10156 | 130   | 108  | 11141 | 109   |
| ENSMUSG00000035963.8  | Odf3l2         | 0.00161285  | 0.015031549 | 4 | 6 | 12.75   | 0.5          | 12.25        | 3.379947919  | 4.699302199 | Higher in Normal | 38   | 8    | 5     | 0     | 1    | 0     | 0     | 1    | 0     | 0     |
| ENSMUSG00000109917.1  | Gm45671        | 0.001619808 | 0.015090333 | 4 | 6 | 17      | 0.833333333  | 16.166666667 | 3.42091418   |             |                  |      |      |       |       |      |       |       |      |       |       |

|                       |               |             |             |   |   |         |             |             |             |                  |                  |      |      |      |      |     |      |     |     |      |      |    |    |
|-----------------------|---------------|-------------|-------------|---|---|---------|-------------|-------------|-------------|------------------|------------------|------|------|------|------|-----|------|-----|-----|------|------|----|----|
| ENSMUSG00000082245.1  | Gm6292        | 0.001836082 | 0.016598877 | 4 | 6 | 13.5    | 0.833333333 | 12.66666667 | 3.21804676  | 4.281186007      | Higher in Normal | 31   | 5    | 18   | 0    | 0   | 0    | 0   | 1   | 2    | 2    |    |    |
| ENSMUSG00000063021.3  | Hist1h2ak     | 0.001845353 | 0.016648091 | 4 | 6 | 2.5     | 87.16666667 | 84.66666667 | 3.196129811 | 4.369057362      | Higher in TRIM24 | 8    | 0    | 0    | 2    | 72  | 11   | 12  | 1   | 4    | 423  |    |    |
| ENSMUSG00000106991.1  | Gm43399       | 0.001849293 | 0.016670609 | 4 | 6 | 23      | 4.333333333 | 18.66666667 | 2.520112967 | 2.890577218      | Higher in Normal | 53   | 11   | 26   | 2    | 2   | 1    | 1   | 3   | 17   |      |    |    |
| ENSMUSG00000017978.18 | Cadps2        | 0.001849492 | 0.016670609 | 4 | 6 | 1797.75 | 227.5       | 1570.25     | 2.650423431 | 3.09934306       | Higher in Normal | 863  | 587  | 2997 | 2744 | 168 | 12   | 85  | 6   | 988  | 106  |    |    |
| ENSMUSG00000058934.8  | Igf1os        | 0.001855434 | 0.016714275 | 4 | 6 | 53      | 9           | 44          | 2.612735486 | 3.039570444      | Higher in Normal | 120  | 84   | 3    | 5    | 4   | 2    | 3   | 6   | 16   | 23   |    |    |
| ENSMUSG00000078144.4  | Caps2         | 0.001857926 | 0.01672277  | 4 | 6 | 4.5     | 70.83333333 | 66.33333333 | 2.671447216 | 3.16930059       | Higher in TRIM24 | 3    | 3    | 6    | 6    | 22  | 5    | 6   | 3   | 28   | 361  |    |    |
| ENSMUSG00000104031.1  | Gm17771       | 0.001877757 | 0.016850554 | 4 | 6 | 8.5     | 1.333333333 | 7.166666667 | 2.43693091  | 2.780556272      | Higher in Normal | 14   | 3    | 10   | 7    | 2   | 1    | 0   | 1   | 1    | 3    |    |    |
| ENSMUSG00000093985.7  | Gm10406       | 0.001880098 | 0.016866599 | 4 | 6 | 27.5    | 3.5         | 24          | 2.512555067 | 2.890450541      | Higher in Normal | 22   | 28   | 23   | 37   | 0   | 3    | 11  | 2   | 5    | 0    |    |    |
| ENSMUSG00000055413.2  | H2-Q5         | 0.001882025 | 0.016878908 | 4 | 6 | 2268    | 316.3333333 | 1951.666667 | 2.452592806 | 2.791438285      | Higher in Normal | 711  | 752  | 4059 | 3550 | 33  | 32   | 102 | 475 | 1069 | 187  |    |    |
| ENSMUSG00000109893.1  | Gm9655        | 0.001908948 | 0.017065461 | 4 | 6 | 15      | 277.3333333 | 262.3333333 | 3.073977207 | 4.019461445      | Higher in TRIM24 | 21   | 6    | 16   | 17   | 1   | 1    | 234 | 564 | 12   | 852  |    |    |
| ENSMUSG00000041805.3  | Pramel1       | 0.001913918 | 0.017110084 | 4 | 6 | 9.75    | 1.666666667 | 8.583333333 | 2.850550228 | 3.461311332      | Higher in Normal | 20   | 6    | 11   | 2    | 1   | 0    | 0   | 0   | 2    | 4    |    |    |
| ENSMUSG00000085407.1  | 1700095iO3Rik | 0.001924731 | 0.017165851 | 4 | 6 | 1       | 17.33333333 | 16.33333333 | 2.9665567   | 3.798228441      | Higher in TRIM24 | 3    | 0    | 0    | 1    | 0   | 1    | 0   | 3   | 17   | 15   | 24 | 45 |
| ENSMUSG00000070469.12 | Adams13       | 0.001949096 | 0.017352654 | 4 | 6 | 118.75  | 943.5       | 824.75      | 2.479688323 | 2.854050318      | Higher in TRIM24 | 152  | 66   | 142  | 115  | 24  | 1693 | 232 | 404 | 157  | 3151 |    |    |
| ENSMUSG00000071531.2  | Gprin2        | 0.001954463 | 0.017395353 | 4 | 6 | 9.25    | 1.333333333 | 7.916666667 | 2.516481893 | 2.901406395      | Higher in Normal | 10   | 3    | 14   | 10   | 0   | 1    | 1   | 0   | 4    | 2    |    |    |
| ENSMUSG00000109674.1  | Gm45470       | 0.001959255 | 0.017427808 | 4 | 6 | 158.5   | 13.33333333 | 145.1666667 | 3.118185438 | 4.014810322      | Higher in Normal | 443  | 181  | 9    | 1    | 4   | 2    | 8   | 0   | 51   | 15   |    |    |
| ENSMUSG00000110086.1  | Gm45623       | 0.001978571 | 0.017548364 | 4 | 6 | 9.5     | 1           | 8.5         | 2.861180099 | 3.49412749       | Higher in Normal | 16   | 1    | 13   | 8    | 0   | 0    | 0   | 2   | 0    | 1    | 3  |    |
| ENSMUSG00000104417.1  | Gm37068       | 0.001984029 | 0.017586522 | 4 | 6 | 10.25   | 1.333333333 | 8.916666667 | 2.784714225 | 3.335297202      | Higher in Normal | 10   | 5    | 18   | 8    | 0   | 0    | 0   | 0   | 2    | 0    | 3  | 5  |
| ENSMUSG0000011548.1   | Gm8162        | 0.001985661 | 0.017595887 | 4 | 6 | 32      | 1.666666667 | 30.33333333 | 3.379580384 | 4.789789668      | Higher in Normal | 48   | 79   | 1    | 0    | 2   | 0    | 0   | 0   | 0    | 5    | 3  |    |
| ENSMUSG00000092222.1  | Gm20506       | 0.002005359 | 0.017739442 | 4 | 6 | 7.75    | 1           | 6.75        | 2.51706937  | 2.924652212      | Higher in Normal | 7    | 5    | 14   | 0    | 2   | 1    | 1   | 1   | 1    | 1    |    |    |
| ENSMUSG00000084921.1  | Gm13838       | 0.002019063 | 0.017829593 | 4 | 6 | 6.25    | 0           | 6.25        | 3.478381067 | 5.097761783      | Higher in Normal | 1    | 8    | 12   | 4    | 0   | 0    | 0   | 0   | 0    | 0    | 0  |    |
| ENSMUSG00000107634.1  | Gm36816       | 0.002019760 | 0.017831543 | 4 | 6 | 40      | 3.666666667 | 36.33333333 | 3.028196292 | 3.827740293      | Higher in Normal | 80   | 74   | 4    | 2    | 6   | 0    | 1   | 0   | 11   | 4    |    |    |
| ENSMUSG00000095351.2  | Igkv3-2       | 0.002032951 | 0.017902227 | 4 | 6 | 574.5   | 79.5        | 495         | 2.732914117 | 3.251217412      | Higher in Normal | 35   | 1234 | 449  | 580  | 26  | 1    | 184 | 4   | 122  | 140  |    |    |
| ENSMUSG00000022229.2  | Atp12a        | 0.002041393 | 0.017946399 | 4 | 6 | 136.5   | 20.33333333 | 116.1666667 | 2.545483493 | 2.941052259      | Higher in Normal | 109  | 15   | 205  | 217  | 21  | 1    | 3   | 1   | 63   | 33   |    |    |
| ENSMUSG00000092335.1  | Zfp977        | 0.002064868 | 0.018123697 | 4 | 6 | 29.5    | 5.166666667 | 24.33333333 | 2.422467005 | 2.755081762      | Higher in Normal | 47   | 26   | 25   | 20   | 0   | 3    | 4   | 0   | 18   | 6    |    |    |
| ENSMUSG00000111899.1  | Gm18636       | 0.002067602 | 0.018142465 | 4 | 6 | 8       | 0.333333333 | 7.666666667 | 3.350857698 | 4.555918023      | Higher in Normal | 13   | 1    | 15   | 3    | 0   | 0    | 0   | 0   | 0    | 2    |    |    |
| ENSMUSG00000038233.9  | Fam198a       | 0.002092736 | 0.018304981 | 4 | 6 | 95.25   | 18          | 77.25       | 2.376386877 | 2.686685263      | Higher in Normal | 147  | 88   | 84   | 62   | 1   | 3    | 11  | 4   | 75   | 14   |    |    |
| ENSMUSG00000026621.13 | 1-Mar         | 0.002099304 | 0.018341348 | 4 | 6 | 373.75  | 47.66666667 | 326.0833333 | 2.702026145 | 3.202766974      | Higher in Normal | 1232 | 210  | 46   | 7    | 38  | 21   | 22  | 13  | 156  | 36   |    |    |
| ENSMUSG00000071322.12 | Tcp10a        | 0.002104508 | 0.018376268 | 4 | 6 | 9.75    | 1           | 8.75        | 2.945336428 | 3.678598141      | Higher in Normal | 24   | 4    | 9    | 2    | 0   | 1    | 0   | 0   | 1    | 4    |    |    |
| ENSMUSG00000038677.13 | Scube3        | 0.002109391 | 0.018407735 | 4 | 6 | 1278    | 224.1666667 | 1053.833333 | 2.337283706 | 2.630799531      | Higher in Normal | 314  | 297  | 2427 | 2074 | 28  | 15   | 79  | 375 | 217  | 631  |    |    |
| ENSMUSG00000054958.6  | Nt5c1a        | 0.002114222 | 0.018435925 | 4 | 6 | 14.5    | 1.333333333 | 13.16666667 | 2.861244503 | 3.505999712      | Higher in Normal | 10   | 2    | 34   | 12   | 0   | 2    | 0   | 5   | 1    | 1    |    |    |
| ENSMUSG00000079103.2  | Tgm7          | 0.002122023 | 0.018476223 | 4 | 6 | 6.75    | 0.833333333 | 5.916666667 | 2.656333696 | 3.163611589      | Higher in Normal | 6    | 7    | 6    | 8    | 0   | 2    | 0   | 0   | 1    | 2    |    |    |
| ENSMUSG00000020059.9  | Sycp3         | 0.002126953 | 0.018513852 | 4 | 6 | 135.5   | 20          | 115.5       | 2.595919344 | 3.027732528      | Higher in Normal | 311  | 195  | 17   | 0    | 3   | 4    | 69  | 13  |      |      |    |    |
| ENSMUSG00000086881.1  | Gm13594       | 0.002133803 | 0.018568172 | 4 | 6 | 24      | 4.666666667 | 19.33333333 | 2.460646851 | 2.814336772      | Higher in Normal | 16   | 49   | 12   | 19   | 2   | 1    | 0   | 1   | 14   | 10   |    |    |
| ENSMUSG00000096672.1  | Ighv1-63      | 0.002150391 | 0.018633636 | 4 | 6 | 17      | 2.166666667 | 14.83333333 | 3.062943519 | Higher in Normal | 6                | 4    | 27   | 31   | 5    | 1   | 0    | 0   | 1   | 6    |      |    |    |
| ENSMUSG00000085569.1  | Gm12602       | 0.002172149 | 0.018799773 | 4 | 6 | 11      | 217         | 206         | 3.055567523 | 4.022788165      | Higher in TRIM24 | 32   | 11   | 0    | 1    | 0   | 219  | 99  | 172 | 328  | 484  |    |    |
| ENSMUSG00000086715.1  | B230112j18Rik | 0.002172781 | 0.018799894 | 4 | 6 | 9.5     | 0.833333333 | 8.666666667 | 3.004991108 | 3.782752939      | Higher in Normal | 8    | 1    | 15   | 14   | 0   | 0    | 0   | 0   | 2    | 3    |    |    |
| ENSMUSG00000053353.5  | 2310001K24Rik | 0.002184148 | 0.018867695 | 4 | 6 | 8.5     | 1.166666667 | 7.333333333 | 2.749525255 | 3.298551335      | Higher in Normal | 15   | 10   | 6    | 3    | 1   | 0    | 0   | 0   | 2    | 4    |    |    |
| ENSMUSG00000031957.6  | Ctrb1         | 0.002199489 | 0.01898782  | 4 | 6 | 26      | 0.002199489 | 23.33333333 | 3.489264073 | Higher in Normal | 79               | 1    | 22   | 2    | 0    | 1   | 3    | 3   | 6   |      |      |    |    |
| ENSMUSG00000100819.1  | Gm2693        | 0.002203089 | 0.019008117 | 4 | 6 | 10.5    | 1.833333333 | 8.666666667 | 2.383010223 | 2.712058282      | Higher in Normal | 10   | 17   | 7    | 8    | 2   | 0    | 2   | 3   | 0    | 4    |    |    |
| ENSMUSG00000045004.3  | Spat21        | 0.00220628  | 0.019023364 | 4 | 6 | 28.25   | 5.333333333 | 22.91666667 | 2.443230383 | 2.790605485      | Higher in Normal | 71   | 4    | 33   | 5    | 1   | 2    | 2   | 0   | 6    | 18   |    |    |
| ENSMUSG00000091601.3  | Ofp93         | 0.002214293 | 0.019077761 | 4 | 6 | 6.5     | 0.5         | 6           | 3.081677991 | 3.921902884      | Higher in Normal | 12   | 4    | 8    | 2    | 0   | 0    | 0   | 1   | 2    | 0    |    |    |
| ENSMUSG00000009114.17 | 2610028H24Rik | 0.00222438  | 0.019142993 | 4 | 6 | 33.25   | 5           | 28.25       | 2.744161797 | 3.28047873       | Higher in Normal | 78   | 6    | 33   | 16   | 1   | 1    | 0   | 0   | 10   | 18   |    |    |
| ENSMUSG00000024747.3  | Aldh1a7       | 0.002232307 | 0.019196803 | 4 | 6 | 1337.5  | 95.83333333 | 1241.666667 | 3.124226012 | 4.072043556      | Higher in Normal | 3282 | 1951 | 48   | 69   | 194 | 2    | 14  | 2   | 345  | 18   |    |    |
| ENSMUSG00000066072.13 | Cyp4a10       | 0.002244895 | 0.01920145  | 4 | 6 | 14.25   | 2.166666667 | 12.08333333 | 2.699853976 | 3.208019228      | Higher in Normal | 31   | 14   | 7    | 5    | 2   | 0    | 0   | 0   | 4    | 7    |    |    |
| ENSMUSG00000103662.1  | Gm34294       | 0.002256092 | 0.019361183 | 4 | 6 | 44.5    | 7.833333333 | 36.66666667 | 2.646696144 | 3.11618754       | Higher in Normal | 81   | 68   | 22   | 7    | 3   | 1    | 1   | 0   | 20   | 22   |    |    |
| ENSMUSG00000043089.6  | Mmp1a         | 0.002261581 | 0.019397355 | 4 | 6 | 0       | 24.5        | 24.5        | 3.562630314 | 6.727812216      | Higher in TRIM24 | 0    | 0    | 0    | 30   | 0   | 0    | 1   | 42  | 74   |      |    |    |
| ENSMUSG00000111840.1  | Gm48832       | 0.002268401 | 0.019438513 | 4 | 6 | 106     | 11.5        | 94.5        | 2.1912503   | 3.607628423      | Higher in Normal | 237  | 175  | 6    | 6    | 1   | 2    | 10  | 1   | 48   | 7    |    |    |
| ENSMUSG00000031786.7  | Drc7          | 0.002268933 | 0.019438513 | 4 | 6 | 15.75   | 2.666666667 | 13.08333333 | 2.353654232 | 2.665557667      | Higher in Normal | 35   | 1    | 17   | 10   | 1   | 2    | 2   | 2   | 4    | 5    |    |    |
| ENSMUSG00000109728.1  | Gm45359       | 0.002289247 | 0.019581965 | 4 | 6 | 4       | 0           | 4.5         | 3.329265965 | 4.676046474      | Higher in TRIM24 | 0    | 0    | 0    | 0    | 9   | 1    | 1   | 7   | 5    | 4    |    |    |
| ENSMUSG00000054618.8  | Gm9951        | 0.002289536 | 0.019581965 | 4 | 6 | 42.75   | 6.833333333 | 35.91666667 | 2.51956943  | 2.916676939      | Higher in Normal | 119  | 45   | 4    | 3    | 7   | 4    | 3   | 10  | 14   |      |    |    |
| ENSMUSG00000061517.8  | Sox21         | 0.002292524 | 0.019602011 | 4 | 6 | 14.5    | 122         | 107.5       | 2.745662652 | 3.338233164      | Higher in TRIM24 | 9    | 2    | 22   | 25   | 245 | 155  | 10  | 16  | 302  | 4    |    |    |
| ENSMUSG00000027718.8  | Ii21          | 0.002307397 | 0.019723647 | 4 | 6 | 13      | 2.5         | 10.5        | 2.821967279 | Higher in Normal | 4                | 25   | 6    | 17   | 1    | 1   | 1    | 0   | 4   | 8    |      |    |    |
| ENSMUSG00000016386.15 | Mpped2        | 0.002328268 | 0.019879727 | 4 | 6 | 312.5   | 53.83333333 | 258.6666667 | 2.32949947  | 2.626811023      | Higher in Normal | 184  | 120  | 485  | 461  | 134 | 4    | 19  | 2   | 68   | 96   |    |    |
| ENSMUSG00000053441.4  | Adams19       | 0.002336055 | 0.019940624 | 4 | 6 | 35.25   | 6.666666667 | 28.58333333 | 2.473197598 | 2.839852088      | Higher in Normal | 87   | 11   | 28   | 15   | 1   | 0    | 5   | 1   | 16   | 17   |    |    |
| ENSMUSG00000082079.1  | Dnmt3c        | 0.002339667 | 0.019960265 | 4 | 6 | 27      | 3           | 24          | 2.990113484 | 3.774554129      | Higher in Normal | 80   | 3    | 20   | 5    | 3   | 0    | 0   | 0   | 2    | 13   |    |    |
| ENSMUSG00000090642.2  | Gm17182       | 0.002349321 | 0.020016384 | 4 | 6 | 11      | 1.666666667 | 9.333333333 | 2.68650462  | 3.186363201      | Higher in Normal | 2    |      |      |      |     |      |     |     |      |      |    |    |

|                       |               |             |              |   |   |          |               |               |             |             |                  |       |       |      |      |      |      |      |      |      |      |
|-----------------------|---------------|-------------|--------------|---|---|----------|---------------|---------------|-------------|-------------|------------------|-------|-------|------|------|------|------|------|------|------|------|
| ENSMUSG00000111400.1  | Gm29961       | 0.002655026 | 0.021795691  | 4 | 6 | 13.75    | 1.333333333   | 10.216666667  | 3.017588312 | 3.883565493 | Higher in Normal | 37    | 9     | 7    | 2    | 0    | 0    | 0    | 0    | 4    | 4    |
| ENSMUSG00000042041.6  | 2010003K11Rik | 0.002678616 | 0.021942024  | 4 | 6 | 156.25   | 14.5          | 141.75        | 2.874329746 | 3.569237525 | Higher in Normal | 487   | 112   | 12   | 14   | 18   | 1    | 1    | 14   | 51   | 2    |
| ENSMUSG00000101693.1  | Gm19461       | 0.002691361 | 0.02200498   | 4 | 6 | 26       | 4.5           | 21.5          | 2.478240142 | 2.86335666  | Higher in Normal | 48    | 5     | 39   | 12   | 3    | 0    | 0    | 0    | 10   | 12   |
| ENSMUSG00000063529.3  | Stmnd1        | 0.002693676 | 0.022018003  | 4 | 6 | 9.5      | 1             | 8.5           | 2.913214182 | 3.668307823 | Higher in Normal | 14    | 15    | 3    | 6    | 0    | 0    | 0    | 0    | 4    | 2    |
| ENSMUSG00000063887.13 | Nlgn1         | 0.0027244   | 0.022333284  | 4 | 6 | 181.75   | 35.5          | 146.25        | 2.509441529 | 2.914250952 | Higher in Normal | 178   | 50    | 252  | 247  | 8    | 1    | 14   | 0    | 61   | 129  |
| ENSMUSG00000027513.11 | Pck1          | 0.002729353 | 0.022621811  | 4 | 6 | 12395.25 | 1068.8333333  | 11326.41667   | 3.005525813 | 3.855552095 | Higher in Normal | 19277 | 29347 | 424  | 533  | 1837 | 192  | 249  | 9    | 3937 | 189  |
| ENSMUSG00000047155.13 | Cyp4k1        | 0.002745453 | 0.022375149  | 4 | 6 | 31.75    | 3.5           | 28.25         | 3.960669127 | 3.050850882 | Higher in Normal | 96    | 24    | 2    | 5    | 1    | 0    | 0    | 0    | 5    | 15   |
| ENSMUSG00000080142.2  | Gm12838       | 0.002756494 | 0.022447109  | 4 | 6 | 27       | 3.833333333   | 23.166666667  | 2.665228463 | 3.181261856 | Higher in Normal | 88    | 3     | 16   | 1    | 3    | 1    | 4    | 1    | 11   | 11   |
| ENSMUSG00000020953.7  | Coch          | 0.00275876  | 0.022459554  | 4 | 6 | 26.25    | 5             | 21.25         | 2.344604746 | 2.659935823 | Higher in Normal | 28    | 7     | 44   | 26   | 0    | 0    | 6    | 1    | 12   | 11   |
| ENSMUSG00000057729.12 | Prtm3         | 0.002773133 | 0.022546423  | 4 | 6 | 91.25    | 1504.3333333  | 1413.0833333  | 3.026029828 | 4.037694375 | Higher in TRIM24 | 169   | 115   | 39   | 42   | 6632 | 23   | 23   | 77   | 2176 | 95   |
| ENSMUSG00000106958.1  | Gm35960       | 0.00278997  | 0.022659113  | 4 | 6 | 0.25     | 6.666666667   | 6.416666667   | 3.158545395 | 4.442251124 | Higher in TRIM24 | 1     | 0     | 0    | 0    | 15   | 1    | 2    | 3    | 16   | 3    |
| ENSMUSG00000085320.1  | Gm11548       | 0.002793083 | 0.022678347  | 4 | 6 | 15.75    | 1.666666667   | 14.583333333  | 3.196340581 | 4.379782614 | Higher in Normal | 46    | 2     | 14   | 1    | 1    | 0    | 0    | 0    | 0    | 6    |
| ENSMUSG00000107078.1  | Gm36840       | 0.002797546 | 0.022702474  | 4 | 6 | 12.75    | 0.666666667   | 12.083333333  | 3.149063136 | 4.254809911 | Higher in Normal | 7     | 2     | 27   | 15   | 0    | 0    | 0    | 0    | 4    | 0    |
| ENSMUSG00000096257.2  | Ccer2         | 0.002810708 | 0.022797135  | 4 | 6 | 13       | 0.833333333   | 12.166666667  | 3.196509174 | 4.403568173 | Higher in Normal | 32    | 1     | 18   | 1    | 0    | 0    | 0    | 1    | 0    | 4    |
| ENSMUSG00000025936.15 | Gm4956        | 0.002834524 | 0.022965826  | 4 | 6 | 10.25    | 1             | 9.25          | 2.883354998 | 3.619031173 | Higher in Normal | 22    | 2     | 15   | 2    | 0    | 0    | 1    | 0    | 3    | 2    |
| ENSMUSG00000085079.3  | Khdclb        | 0.002852979 | 0.023078507  | 4 | 6 | 11.5     | 0.666666667   | 10.833333333  | 3.304774168 | 4.638808262 | Higher in Normal | 29    | 3     | 13   | 1    | 0    | 0    | 0    | 0    | 0    | 4    |
| ENSMUSG00000003341.9  | Atp8b3        | 0.002855685 | 0.023088133  | 4 | 6 | 97       | 16            | 81            | 2.510947148 | 2.924679028 | Higher in Normal | 294   | 6     | 78   | 10   | 5    | 8    | 3    | 18   | 8    | 54   |
| ENSMUSG00000057913.2  | Gm10032       | 0.002899197 | 0.023384043  | 4 | 6 | 436.25   | 39.833333333  | 396.4166667   | 2.858400597 | 3.552933388 | Higher in Normal | 199   | 19    | 710  | 817  | 30   | 4    | 3    | 0    | 175  | 27   |
| ENSMUSG00000051431.7  | Gpr87         | 0.00290163  | 0.023385083  | 4 | 6 | 32.5     | 44.21666667   | 409.6666667   | 3.071169589 | 4.194359906 | Higher in TRIM24 | 18    | 10    | 48   | 54   | 30   | 1510 | 8    | 2    | 1081 | 22   |
| ENSMUSG00000087162.1  | Gm14244       | 0.002909311 | 0.023433125  | 4 | 6 | 7.75     | 1             | 6.75          | 2.68862666  | 3.246018302 | Higher in Normal | 8     | 8     | 13   | 2    | 0    | 1    | 0    | 0    | 2    | 3    |
| ENSMUSG00000046317.14 | Bc107364      | 0.002948324 | 0.0236799115 | 4 | 6 | 56       | 7.5           | 48.5          | 2.921393962 | 3.688347548 | Higher in Normal | 69    | 125   | 17   | 13   | 0    | 2    | 0    | 0    | 16   | 27   |
| ENSMUSG00000084713.2  | Gm24627       | 0.002952694 | 0.023708764  | 4 | 6 | 0        | 14.333333333  | 14.333333333  | 3.471563829 | 6.289750795 | Higher in TRIM24 | 0     | 0     | 0    | 0    | 0    | 0    | 30   | 32   | 2    | 22   |
| ENSMUSG00000000381.10 | Wap           | 0.002978868 | 0.023843474  | 4 | 6 | 2287     | 112.333333333 | 2174.6666667  | 3.043533192 | 3.977307783 | Higher in Normal | 183   | 2     | 3412 | 5551 | 10   | 263  | 81   | 3    | 294  | 23   |
| ENSMUSG00000106478.1  | Gm36551       | 0.002985713 | 0.023879429  | 4 | 6 | 4        | 34.833333333  | 30.833333333  | 2.597950286 | 3.114604711 | Higher in TRIM24 | 11    | 1     | 3    | 1    | 124  | 5    | 8    | 8    | 32   | 32   |
| ENSMUSG00000034427.17 | Myo15b        | 0.003010638 | 0.024034584  | 4 | 6 | 215      | 34            | 181           | 2.744261381 | 3.33623984  | Higher in Normal | 629   | 31    | 183  | 17   | 8    | 7    | 1    | 1    | 56   | 131  |
| ENSMUSG00000054200.6  | Ffar4         | 0.003011279 | 0.024076566  | 4 | 6 | 315      | 54.333333333  | 260.6666667   | 2.358842661 | 2.692135255 | Higher in Normal | 558   | 627   | 35   | 40   | 68   | 8    | 64   | 62   | 97   | 27   |
| ENSMUSG00000076672.7  | Ighv3-6       | 0.003021381 | 0.02410139   | 4 | 6 | 71.75    | 12.333333333  | 59.416666667  | 2.45004875  | 2.832636203 | Higher in Normal | 2     | 89    | 103  | 93   | 8    | 3    | 23   | 0    | 9    | 31   |
| ENSMUSG00000032451.6  | Trim42        | 0.003041739 | 0.02425703   | 4 | 6 | 11.75    | 1.333333333   | 10.416666667  | 2.726321343 | 3.326066035 | Higher in Normal | 33    | 4     | 8    | 2    | 2    | 0    | 0    | 1    | 3    | 2    |
| ENSMUSG00000098401.1  | Mir6377       | 0.003061936 | 0.024322938  | 4 | 6 | 9.25     | 0.333333333   | 8.916666667   | 3.366441117 | 4.974354455 | Higher in Normal | 12    | 24    | 0    | 1    | 0    | 0    | 0    | 0    | 1    | 1    |
| ENSMUSG00000086413.1  | Gm12415       | 0.003082494 | 0.024441611  | 4 | 6 | 0        | 29.66666667   | 29.66666667   | 3.468094583 | 6.849672759 | Higher in TRIM24 | 0     | 0     | 0    | 0    | 0    | 0    | 11   | 42   | 1    | 124  |
| ENSMUSG00000099320.1  | Mir7664       | 0.003084909 | 0.024448022  | 4 | 6 | 6.75     | 0.5           | 6.25          | 2.935788991 | 3.729075908 | Higher in Normal | 3     | 1     | 15   | 8    | 0    | 0    | 1    | 0    | 1    | 1    |
| ENSMUSG00000027517.13 | Ankr60        | 0.003087763 | 0.024464286  | 4 | 6 | 30.75    | 3.833333333   | 26.916666667  | 2.894280654 | 3.639160101 | Higher in Normal | 87    | 6     | 29   | 1    | 1    | 0    | 1    | 0    | 6    | 15   |
| ENSMUSG00000104951.1  | Gm43413       | 0.003089776 | 0.024467493  | 4 | 6 | 97.5     | 20.66666667   | 76.833333333  | 2.391598168 | 2.743444186 | Higher in Normal | 237   | 105   | 29   | 19   | 16   | 3    | 1    | 5    | 47   | 52   |
| ENSMUSG00000026387.15 | Sctr          | 0.003094621 | 0.02480952   | 4 | 6 | 138.5    | 25.16666667   | 113.333333333 | 2.570642648 | 3.032250498 | Higher in Normal | 315   | 216   | 18   | 5    | 12   | 8    | 6    | 2    | 59   | 64   |
| ENSMUSG00000037738.11 | Nek5          | 0.003107488 | 0.024556655  | 4 | 6 | 81.25    | 18.833333333  | 62.416666667  | 2.398464997 | 2.752818974 | Higher in Normal | 142   | 56    | 61   | 66   | 5    | 0    | 1    | 4    | 33   | 70   |
| ENSMUSG00000042414.7  | Pdrn14        | 0.003111433 | 0.024575074  | 4 | 6 | 33.75    | 5             | 28.75         | 2.629592555 | 3.134342517 | Higher in Normal | 90    | 2     | 32   | 1    | 0    | 0    | 0    | 0    | 12   | 13   |
| ENSMUSG00000066364.2  | Serpina3b     | 0.003158465 | 0.024603538  | 4 | 6 | 18.75    | 3.166666667   | 15.583333333  | 2.509655025 | 2.928545384 | Higher in Normal | 217   | 2     | 30   | 26   | 1    | 2    | 0    | 0    | 0    | 13   |
| ENSMUSG00000097636.7  | Mirt1         | 0.003123761 | 0.024653257  | 4 | 6 | 130.25   | 734.6666667   | 604.4166667   | 2.373813788 | 2.735164876 | Higher in TRIM24 | 173   | 86    | 135  | 87   | 158  | 2342 | 148  | 72   | 1014 | 674  |
| ENSMUSG00000090785.1  | Gm17116       | 0.003141503 | 0.024774015  | 4 | 6 | 9        | 1             | 8             | 2.859568045 | 3.600828646 | Higher in Normal | 11    | 20    | 3    | 2    | 1    | 0    | 0    | 0    | 3    | 2    |
| ENSMUSG00000094634.8  | Gm3468        | 0.003148989 | 0.024807355  | 4 | 6 | 45.25    | 3.166666667   | 42.083333333  | 2.860977048 | 3.593304671 | Higher in Normal | 4     | 26    | 73   | 78   | 0    | 0    | 9    | 7    | 3    | 0    |
| ENSMUSG00000021803.9  | Cdhr1         | 0.003152649 | 0.024817161  | 4 | 6 | 393.75   | 47.16666667   | 346.583333333 | 2.59525361  | 3.07708973  | Higher in Normal | 167   | 69    | 656  | 683  | 97   | 1    | 5    | 3    | 138  | 39   |
| ENSMUSG00000049103.1  | Ccr2          | 0.003163807 | 0.024891884  | 4 | 6 | 723.75   | 4900.166667   | 4176.416667   | 2.333179099 | 2.672706122 | Higher in TRIM24 | 1011  | 1685  | 123  | 76   | 891  | 7191 | 7785 | 4964 | 2609 | 5961 |
| ENSMUSG00000057050.7  | Oflr397       | 0.003172815 | 0.02494986   | 4 | 6 | 8        | 0.5           | 7.5           | 3.162626386 | 4.256873865 | Higher in Normal | 23    | 2     | 6    | 1    | 0    | 0    | 0    | 0    | 1    | 2    |
| ENSMUSG00000020010.7  | Vnn3          | 0.003176937 | 0.024962936  | 4 | 6 | 337      | 24.833333333  | 23.166666667  | 3.044810106 | 4.006762763 | Higher in Normal | 296   | 991   | 28   | 33   | 0    | 0    | 74   | 28   | 39   | 8    |
| ENSMUSG00000054061.8  | Gm9934        | 0.003189824 | 0.025038347  | 4 | 6 | 6.75     | 0.166666667   | 6.583333333   | 3.257785801 | 4.712992451 | Higher in Normal | 18    | 1     | 6    | 2    | 0    | 0    | 1    | 0    | 0    | 0    |
| ENSMUSG00000082046.1  | Gm14464       | 0.003192434 | 0.025045927  | 4 | 6 | 34.25    | 6             | 28.25         | 2.645373591 | 3.164180515 | Higher in Normal | 81    | 31    | 24   | 1    | 2    | 2    | 1    | 0    | 7    | 24   |
| ENSMUSG00000084390.1  | Gm15425       | 0.003196734 | 0.02506029   | 4 | 6 | 14.5     | 1.666666667   | 13.333333333  | 3.003492069 | 3.941206517 | Higher in Normal | 45    | 0     | 7    | 6    | 0    | 1    | 0    | 1    | 1    | 4    |
| ENSMUSG00000085673.1  | Gm16122       | 0.003204992 | 0.025105631  | 4 | 6 | 6.25     | 0.333333333   | 5.916666667   | 3.108737167 | 4.136394706 | Higher in Normal | 11    | 1     | 11   | 2    | 0    | 0    | 0    | 0    | 1    | 1    |
| ENSMUSG00000094797.1  | Ighv6-15      | 0.003221883 | 0.025224963  | 4 | 6 | 378      | 98.333333333  | 279.6666667   | 2.509568793 | 2.93523846  | Higher in Normal | 114   | 874   | 216  | 308  | 9    | 15   | 38   | 4    | 14   | 510  |
| ENSMUSG00000107622.1  | 493051216Rik  | 0.003234831 | 0.025376494  | 4 | 6 | 15.75    | 2.333333333   | 13.416666667  | 2.574667665 | 3.053631313 | Higher in Normal | 46    | 6     | 9    | 2    | 0    | 0    | 1    | 1    | 4    | 6    |
| ENSMUSG00000105935.1  | Gm43628       | 0.003271574 | 0.02548315   | 4 | 6 | 16       | 3             | 13            | 2.362197294 | 2.706535537 | Higher in Normal | 31    | 14    | 13   | 6    | 4    | 1    | 0    | 0    | 7    | 6    |
| ENSMUSG000000808208.1 | 1700008003Rik | 0.003274094 | 0.025561437  | 4 | 6 | 12.5     | 2.166666667   | 10.333333333  | 2.408038045 | 2.779157481 | Higher in Normal | 28    | 3     | 15   | 4    | 2    | 1    | 0    | 1    | 3    | 6    |
| ENSMUSG00000098199.1  | Gm9358        | 0.003292285 | 0.025668788  | 4 | 6 | 8.75     | 0.666666667   | 8.083333333   | 3.036242823 | 4.043110667 | Higher in Normal | 18    | 9     | 8    | 0    | 0    | 0    | 0    | 1    | 1    | 2    |
| ENSMUSG00000085851.1  | 4921518K17Rik | 0.00330961  | 0.025766043  | 4 | 6 | 8        | 1             | 7             | 2.725192096 | 3.332690159 | Higher in Normal | 8     | 10    | 9    | 5    | 0    | 0    | 0    | 0    | 4    | 2    |
| ENSMUSG00000081677.1  | Mdk-ps1       | 0.003323063 | 0.025849544  | 4 | 6 | 13.5     | 0.666666667   | 12.833333333  | 3.186771607 | 4.520054485 | Higher in Normal | 37    | 0     | 16   | 1    | 1    | 0    | 0    | 1    | 0    | 0    |
| ENSMUSG00000094124.5  | Ighv1-74      | 0.003344009 | 0.025        |   |   |          |               |               |             |             |                  |       |       |      |      |      |      |      |      |      |      |

|                       |                |             |             |   |   |         |               |               |              |             |                  |      |      |      |      |     |    |      |     |     |     |
|-----------------------|----------------|-------------|-------------|---|---|---------|---------------|---------------|--------------|-------------|------------------|------|------|------|------|-----|----|------|-----|-----|-----|
| ENSMUSG00000113241.1  | Gm40663        | 0.0038627   | 0.028961215 | 4 | 6 | 9.75    | 1.5           | 8.25          | 2.499116174  | 2.949050811 | Higher in Normal | 21   | 2    | 6    | 10   | 1   | 1  | 0    | 0   | 3   | 4   |
| ENSMUSG00000043168.12 | 4930426D05Rrik | 0.003871019 | 0.029002162 | 4 | 6 | 10.25   | 1.833333333   | 8.416666667   | 2.39391464   | 2.778903031 | Higher in Normal | 8    | 20   | 9    | 4    | 0   | 1  | 3    | 0   | 4   | 3   |
| ENSMUSG00000020052.9  | Asc1           | 0.003878588 | 0.029051722 | 4 | 6 | 14      | 2.833333333   | 11.166666667  | 2.382052184  | 2.753209634 | Higher in Normal | 24   | 22   | 5    | 5    | 1   | 1  | 1    | 0   | 7   | 7   |
| ENSMUSG00000045246.11 | Krcg4          | 0.003905569 | 0.029178035 | 4 | 6 | 14.5    | 2.666666667   | 11.833333333  | 2.379782985  | 2.750510961 | Higher in Normal | 32   | 9    | 12   | 5    | 0   | 0  | 3    | 1   | 7   | 5   |
| ENSMUSG00000106524.1  | Gm42706        | 0.003920161 | 0.029253377 | 4 | 6 | 36.75   | 4.666666667   | 32.082333333  | 2.469056217  | 2.898503032 | Higher in Normal | 13   | 5    | 77   | 52   | 8   | 4  | 0    | 0   | 11  | 5   |
| ENSMUSG00000105362.1  | Gm43474        | 0.003952184 | 0.029447472 | 4 | 6 | 12      | 0.833333333   | 11.166666667  | 2.907658539  | 3.808371164 | Higher in Normal | 32   | 1    | 12   | 3    | 2   | 0  | 0    | 1   | 2   | 0   |
| ENSMUSG00000037129.7  | Tmprss13       | 0.003960861 | 0.029493837 | 4 | 6 | 1359    | 169.6666667   | 1189.3333333  | 2.476783847  | 2.908478451 | Higher in Normal | 666  | 559  | 1832 | 2379 | 511 | 11 | 49   | 7   | 398 | 42  |
| ENSMUSG00000105350.1  | 4930537H2ORrik | 0.003963963 | 0.029505105 | 4 | 6 | 6       | 11.25         | 1.166666667   | 10.083333333 | 3.328432464 | Higher in Normal | 26   | 5    | 10   | 4    | 0   | 0  | 0    | 3   | 3   | 1   |
| ENSMUSG00000085177.1  | Gm11209        | 0.003979633 | 0.029575754 | 4 | 6 | 10.25   | 1.833333333   | 8.416666667   | 2.402266012  | 2.795278232 | Higher in Normal | 17   | 17   | 5    | 2    | 1   | 0  | 2    | 1   | 4   | 3   |
| ENSMUSG00000024401.14 | Tnf            | 0.003990719 | 0.029643676 | 4 | 6 | 1961.25 | 276.1666667   | 1685.0833333  | 2.363439705  | 2.726425683 | Higher in Normal | 65   | 174  | 3428 | 4178 | 92  | 95 | 510  | 103 | 713 | 144 |
| ENSMUSG00000082199.1  | Gm15763        | 0.004010196 | 0.02975931  | 4 | 6 | 5.5     | 0.5           | 5             | 2.806279561  | 3.525017905 | Higher in Normal | 4    | 4    | 12   | 2    | 0   | 0  | 1    | 0   | 1   | 1   |
| ENSMUSG00000112662.1  | Gm47922        | 0.004026452 | 0.029858109 | 4 | 6 | 11.75   | 1.5           | 10.25         | 2.786569084  | 3.488462981 | Higher in Normal | 27   | 4    | 14   | 2    | 0   | 1  | 0    | 0   | 1   | 7   |
| ENSMUSG00000108175.1  | Gm16499        | 0.004034927 | 0.029913676 | 4 | 6 | 7.25    | 0.833333333   | 6.416666667   | 2.717846378  | 3.377392665 | Higher in Normal | 13   | 1    | 8    | 7    | 0   | 1  | 0    | 0   | 1   | 3   |
| ENSMUSG00000039552.14 | RspH4a         | 0.004075646 | 0.030142161 | 4 | 6 | 14      | 2.166666667   | 11.833333333  | 2.634826693  | 3.185418537 | Higher in Normal | 35   | 3    | 12   | 6    | 0   | 0  | 2    | 0   | 3   | 8   |
| ENSMUSG00000095298.2  | Gm12407        | 0.004077736 | 0.030150294 | 4 | 6 | 21.25   | 2.666666667   | 18.583333333  | 2.457579821  | 2.888942263 | Higher in Normal | 1    | 10   | 27   | 47   | 0   | 1  | 6    | 3   | 4   | 2   |
| ENSMUSG00000034185.9  | 6430628N08Rrik | 0.00408031  | 0.030161998 | 4 | 6 | 7.75    | 0.666666667   | 7.083333333   | 2.890687703  | 3.780500318 | Higher in Normal | 20   | 1    | 8    | 2    | 0   | 1  | 0    | 0   | 1   | 2   |
| ENSMUSG00000032401.15 | Lctf           | 0.004106247 | 0.030286723 | 4 | 6 | 555.25  | 60.833333333  | 494.4166667   | 2.81256635   | 3.546091187 | Higher in Normal | 1698 | 497  | 19   | 7    | 65  | 2  | 8    | 15  | 219 | 56  |
| ENSMUSG00000085336.1  | Gm11732        | 0.004123187 | 0.030346336 | 4 | 6 | 11.5    | 1.5           | 10            | 2.626732637  | 3.19576143  | Higher in Normal | 15   | 19   | 4    | 8    | 5   | 0  | 0    | 0   | 1   | 3   |
| ENSMUSG00000031344.11 | Gabrg          | 0.004126736 | 0.03036512  | 4 | 6 | 35.75   | 7             | 28.75         | 2.439526231  | 2.849846231 | Higher in Normal | 96   | 14   | 25   | 8    | 1   | 1  | 1    | 1   | 19  | 19  |
| ENSMUSG00000027403.12 | Tgm6f          | 0.004138889 | 0.030417786 | 4 | 6 | 16.75   | 2.166666667   | 14.583333333  | 2.847854522  | 3.619026689 | Higher in Normal | 32   | 5    | 21   | 9    | 0   | 1  | 0    | 0   | 0   | 12  |
| ENSMUSG00000035592.2  | Krt33a         | 0.004144031 | 0.030440879 | 4 | 6 | 45      | 1.833333333   | 43.166666667  | 3.231184644  | 4.814695249 | Higher in Normal | 2    | 0    | 55   | 123  | 0   | 0  | 0    | 0   | 8   | 3   |
| ENSMUSG00000035948.13 | Acsc3          | 0.004153498 | 0.030488358 | 4 | 6 | 368.5   | 65.333333333  | 303.1666667   | 2.464812569  | 2.894871508 | Higher in Normal | 792  | 486  | 111  | 85   | 49  | 23 | 22   | 0   | 202 | 96  |
| ENSMUSG00000081880.1  | Gm5385         | 0.004166338 | 0.030538437 | 4 | 6 | 4.1     | 5.5           | 35.5          | 2.794621213  | 3.508132683 | Higher in Normal | 123  | 7    | 32   | 2    | 2   | 0  | 1    | 0   | 11  | 19  |
| ENSMUSG00000081490.1  | Gm11830        | 0.004196346 | 0.030665773 | 4 | 6 | 7.25    | 0.5           | 6.75          | 2.961109946  | 3.886082652 | Higher in Normal | 10   | 5    | 9    | 5    | 0   | 0  | 0    | 0   | 3   | 0   |
| ENSMUSG00000109262.1  | Gm44744        | 0.004196804 | 0.030665773 | 4 | 6 | 58      | 6.333333333   | 51.666666667  | 2.755478028  | 3.430944112 | Higher in Normal | 20   | 33   | 75   | 104  | 2   | 0  | 0    | 0   | 30  | 6   |
| ENSMUSG00000094370.7  | Gm3373         | 0.004214031 | 0.030753164 | 4 | 6 | 7.75    | 0.5           | 7.25          | 2.957262985  | 4.006652168 | Higher in Normal | 21   | 7    | 2    | 0    | 1   | 1  | 0    | 0   | 1   | 0   |
| ENSMUSG00000090691.3  | Gm3667         | 0.004216318 | 0.030753164 | 4 | 6 | 11.25   | 1.5           | 9.75          | 2.517414765  | 2.998850934 | Higher in Normal | 1    | 6    | 18   | 20   | 0   | 2  | 2    | 0   | 1   | 4   |
| ENSMUSG00000104430.1  | Gm37425        | 0.004235377 | 0.030836624 | 4 | 6 | 6.5     | 0             | 6.5           | 3.317195461  | 5.16036767  | Higher in Normal | 17   | 1    | 7    | 1    | 0   | 0  | 0    | 0   | 0   | 0   |
| ENSMUSG00000086905.1  | Gm13716        | 0.004247106 | 0.030885096 | 4 | 6 | 1.25    | 12            | 10.75         | 2.683189901  | 3.378944997 | Higher in TRIM24 | 3    | 1    | 1    | 4    | 26  | 12 | 1    | 25  | 4   | 4   |
| ENSMUSG00000090925.2  | 1810064F22Rrik | 0.004249346 | 0.030890448 | 4 | 6 | 36      | 5.666666667   | 30.333333333  | 2.497022781  | 2.951106179 | Higher in Normal | 58   | 12   | 37   | 37   | 2   | 0  | 0    | 0   | 23  | 8   |
| ENSMUSG00000089871.1  | Speer4cos      | 0.004274064 | 0.031029259 | 4 | 6 | 15.25   | 1.833333333   | 13.416666667  | 2.869217696  | 3.685664839 | Higher in Normal | 40   | 6    | 14   | 1    | 0   | 1  | 0    | 0   | 1   | 9   |
| ENSMUSG00000109589.1  | Gm45267        | 0.004295601 | 0.031147583 | 4 | 6 | 8.25    | 1.333333333   | 6.916666667   | 2.45725969   | 2.894560686 | Higher in Normal | 5    | 10   | 12   | 6    | 0   | 1  | 0    | 0   | 4   | 3   |
| ENSMUSG00000085069.2  | Gm13111        | 0.004297953 | 0.031150694 | 4 | 6 | 61      | 10.333333333  | 50.666666667  | 2.449893292  | 2.875276274 | Higher in Normal | 77   | 110  | 20   | 37   | 11  | 2  | 2    | 0   | 21  | 6   |
| ENSMUSG00000094134.2  | Ighv5-15       | 0.004317487 | 0.03126994  | 4 | 6 | 21.75   | 3             | 18.75         | 2.754264106  | 3.425264386 | Higher in Normal | 24   | 3    | 27   | 33   | 0   | 0  | 0    | 0   | 5   | 13  |
| ENSMUSG00000073774.2  | Kncn           | 0.00432745  | 0.031290935 | 4 | 6 | 24      | 1.833333333   | 22.166666667  | 3.023145758  | 4.017860528 | Higher in Normal | 82   | 1    | 13   | 0    | 1   | 0  | 0    | 0   | 2   | 6   |
| ENSMUSG00000064225.6  | Paqr9          | 0.004328588 | 0.031290935 | 4 | 6 | 1022.5  | 11.166666667  | 909.333333333 | 2.786473823  | 3.504539713 | Higher in Normal | 2693 | 1364 | 16   | 17   | 132 | 9  | 26   | 21  | 436 | 55  |
| ENSMUSG00000076770.3  | Trav8d-1       | 0.004360803 | 0.031493772 | 4 | 6 | 13      | 2             | 11            | 2.388781612  | 2.790246253 | Higher in Normal | 31   | 2    | 10   | 9    | 1   | 3  | 0    | 0   | 1   | 5   |
| ENSMUSG00000090534.1  | Gm4675         | 0.004393514 | 0.031687216 | 4 | 6 | 1.75    | 19.333333333  | 17.583333333  | 2.701495517  | 3.420818105 | Higher in TRIM24 | 4    | 2    | 1    | 0    | 26  | 19 | 4    | 2   | 63  | 2   |
| ENSMUSG00000082043.1  | Gm12848        | 0.004418374 | 0.031834042 | 4 | 6 | 8       | 0.833333333   | 7.166666667   | 2.851886513  | 3.663119292 | Higher in Normal | 22   | 4    | 5    | 1    | 1   | 0  | 0    | 0   | 1   | 3   |
| ENSMUSG00000048806.4  | Ifnb1          | 0.004426234 | 0.03186805  | 4 | 6 | 36      | 2             | 34            | 4.390612395  | 4.390618252 | Higher in Normal | 0    | 0    | 57   | 87   | 1   | 0  | 0    | 0   | 4   | 6   |
| ENSMUSG00000050424.9  | Pnma5          | 0.004451445 | 0.031981644 | 4 | 6 | 12      | 1.166666667   | 10.833333333  | 2.818757197  | 3.604748422 | Higher in Normal | 20   | 2    | 25   | 1    | 0   | 1  | 0    | 0   | 3   | 3   |
| ENSMUSG00000096463.2  | Ighv2-2        | 0.004466798 | 0.03208423  | 4 | 6 | 73.75   | 10            | 63.75         | 3.566274566  | 3.566274566 | Higher in Normal | 3    | 22   | 123  | 147  | 2   | 2  | 2    | 0   | 0   | 54  |
| ENSMUSG00000051617.3  | Krt9           | 0.004488479 | 0.032198369 | 4 | 6 | 9.25    | 1.666666667   | 7.583333333   | 2.446360751  | 2.868986661 | Higher in Normal | 11   | 4    | 8    | 14   | 0   | 0  | 0    | 0   | 1   | 2   |
| ENSMUSG00000055730.16 | Ces2a          | 0.004502823 | 0.032274473 | 4 | 6 | 19.5    | 2.666666667   | 16.833333333  | 2.640705659  | 3.226406803 | Higher in Normal | 53   | 4    | 19   | 2    | 0   | 2  | 0    | 1   | 5   | 8   |
| ENSMUSG00000086282.1  | Sox50s4        | 0.004515    | 0.032346523 | 4 | 6 | 10.75   | 0.666666667   | 10.083333333  | 3.097837075  | 4.348637401 | Higher in Normal | 32   | 9    | 1    | 1    | 0   | 0  | 0    | 0   | 3   | 1   |
| ENSMUSG00000029123.8  | Stk32b         | 0.004520664 | 0.032375037 | 4 | 6 | 34      | 450.833333333 | 416.833333333 | 2.877191905  | 3.840473039 | Higher in TRIM24 | 82   | 25   | 20   | 9    | 144 | 2  | 1673 | 850 | 8   | 28  |
| ENSMUSG00000074673.15 | Tlfi9          | 0.004535261 | 0.032468754 | 4 | 6 | 22.5    | 3.833333333   | 18.666666667  | 2.629877221  | 3.193318889 | Higher in Normal | 51   | 7    | 22   | 10   | 1   | 0  | 0    | 0   | 6   | 16  |
| ENSMUSG00000076543.2  | Igkv4-74       | 0.004571635 | 0.032675387 | 4 | 6 | 99.25   | 14.666666667  | 84.583333333  | 2.537703178  | 3.033244824 | Higher in Normal | 20   | 71   | 127  | 179  | 4   | 1  | 2    | 0   | 63  | 18  |
| ENSMUSG00000041358.1  | Nutm1          | 0.004581082 | 0.032727543 | 4 | 6 | 17      | 3             | 14            | 2.422627023  | 2.839933663 | Higher in Normal | 45   | 2    | 19   | 2    | 1   | 1  | 2    | 2   | 2   | 10  |
| ENSMUSG00000109232.1  | Gm44577        | 0.004620838 | 0.032988338 | 4 | 6 | 9.5     | 0.5           | 9             | 3.172280469  | 4.531651167 | Higher in Normal | 28   | 3    | 7    | 0    | 0   | 0  | 0    | 0   | 1   | 2   |
| ENSMUSG00000108874.1  | Gm9711         | 0.004641216 | 0.03310216  | 4 | 6 | 11.75   | 0.66666       |               |              |             |                  |      |      |      |      |     |    |      |     |     |     |

|                        |               |             |             |   |   |         |             |             |             |             |                  |      |      |      |       |       |     |     |      |      |      |
|------------------------|---------------|-------------|-------------|---|---|---------|-------------|-------------|-------------|-------------|------------------|------|------|------|-------|-------|-----|-----|------|------|------|
| ENSMUSG00000094763.3   | Gm1647        | 0.005478942 | 0.03730385  | 4 | 6 | 15.5    | 1.333333333 | 14.16666667 | 2.932672916 | 3.96753891  | Higher in Normal | 53   | 1    | 8    | 0     | 1     | 0   | 1   | 0    | 2    | 4    |
| ENSMUSG00000042453.14  | Reln          | 0.005513964 | 0.037530232 | 4 | 6 | 1537    | 241.3333333 | 1295.666667 | 2.422814183 | 2.864220391 | Higher in Normal | 384  | 289  | 3329 | 2146  | 17    | 15  | 676 | 8    | 166  | 566  |
| ENSMUSG00000019102.10  | Aldh3a1       | 0.00540847  | 0.037647731 | 4 | 6 | 38      | 815.6666667 | 777.6666667 | 2.730805129 | 3.537273346 | Higher in TRIM24 | 18   | 12   | 60   | 62    | 11    | 3   | 31  | 37   | 346  | 4466 |
| ENSMUSG00000081070.1   | Gm13181       | 0.005547937 | 0.037672522 | 4 | 6 | 34      | 6.5         | 27.5        | 2.398947026 | 2.825894886 | Higher in Normal | 109  | 7    | 18   | 2     | 1     | 4   | 2   | 4    | 4    | 24   |
| ENSMUSG00000001771.13  | Slc24a4       | 0.005604075 | 0.037977749 | 4 | 6 | 49.75   | 11.5        | 38.25       | 2.36695326  | 2.768986663 | Higher in Normal | 110  | 6    | 60   | 23    | 2     | 2   | 3   | 0    | 12   | 50   |
| ENSMUSG00000039323.18  | Ifgfp2        | 0.00567942  | 0.038385564 | 4 | 6 | 533.75  | 4367.333333 | 3833.583333 | 2.654901793 | 3.365619169 | Higher in TRIM24 | 190  | 33   | 739  | 1173  | 20184 | 51  | 862 | 2820 | 580  | 1707 |
| ENSMUSG00000052974.8   | Cyp2f2        | 0.005694834 | 0.038464131 | 4 | 6 | 533.25  | 83.83333333 | 494.4166667 | 2.362429834 | 2.767680495 | Higher in Normal | 794  | 613  | 307  | 419   | 287   | 4   | 12  | 4    | 128  | 68   |
| ENSMUSG00000024738.5   | Pga5          | 0.005734427 | 0.038675314 | 4 | 6 | 6       | 0.333333333 | 5.666666667 | 3.005014589 | 4.133134662 | Higher in Normal | 16   | 1    | 6    | 1     | 0     | 0   | 0   | 0    | 1    | 1    |
| ENSMUSG00000110757.1   | Gm18228       | 0.005740668 | 0.038666448 | 4 | 6 | 5.25    | 0.333333333 | 4.916666667 | 2.934591516 | 3.93178097  | Higher in Normal | 11   | 2    | 7    | 1     | 0     | 0   | 0   | 0    | 1    | 1    |
| ENSMUSG00000079277.9   | Hoxd3         | 0.005744052 | 0.038710687 | 4 | 6 | 17      | 3.166666667 | 13.83333333 | 2.361963971 | 2.769668535 | Higher in Normal | 37   | 15   | 9    | 7     | 0     | 2   | 1   | 0    | 10   | 6    |
| ENSMUSG00000076518.6   | Igkv2-112     | 0.005751839 | 0.038746014 | 4 | 6 | 15.5    | 1.833333333 | 13.66666667 | 2.449134432 | 2.936647632 | Higher in Normal | 9    | 21   | 10   | 22    | 7     | 1   | 2   | 1    | 0    | 0    |
| ENSMUSG00000021539.8   | Lect2         | 0.005766642 | 0.038811386 | 4 | 6 | 0.25    | 5.5         | 5.25        | 2.961992814 | 4.245343924 | Higher in TRIM24 | 1    | 0    | 0    | 0     | 0     | 0   | 8   | 12   | 3    | 4    |
| ENSMUSG00000100798.1   | Gm19589       | 0.005791922 | 0.038938497 | 4 | 6 | 12.5    | 83.83333333 | 71.33333333 | 2.414819519 | 2.888977016 | Higher in TRIM24 | 34   | 1    | 9    | 6     | 2     | 174 | 156 | 25   | 59   | 87   |
| ENSMUSG00000096311.7   | Faiml         | 0.005793338 | 0.038939413 | 4 | 6 | 33.75   | 4.166666667 | 29.58333333 | 2.82916114  | 3.694212407 | Higher in Normal | 90   | 8    | 36   | 1     | 0     | 0   | 0   | 1    | 7    | 17   |
| ENSMUSG00000033576.11  | Apol6         | 0.005798984 | 0.038960164 | 4 | 6 | 4465.5  | 586.5       | 3879        | 2.678516556 | 3.355132893 | Higher in Normal | 7489 | 9842 | 252  | 279   | 529   | 24  | 129 | 25   | 2580 | 232  |
| ENSMUSG00000047324.5   | Gm1429P17Rik  | 0.00580862  | 0.03901609  | 4 | 6 | 28      | 4.833333333 | 23.16666667 | 2.604207189 | 3.199553816 | Higher in Normal | 69   | 15   | 13   | 15    | 0     | 1   | 0   | 0    | 9    | 19   |
| ENSMUSG000000094094.2  | Igkv5-45      | 0.005831348 | 0.039117184 | 4 | 6 | 7       | 1           | 6           | 2.639272005 | 3.267592784 | Higher in Normal | 5    | 6    | 11   | 6     | 0     | 0   | 1   | 0    | 0    | 5    |
| ENSMUSG000000095609.1  | Gm21188       | 0.005833774 | 0.039123214 | 4 | 6 | 0.25    | 18          | 17.75       | 3.096640483 | 5.150598741 | Higher in TRIM24 | 0    | 1    | 0    | 0     | 3     | 0   | 9   | 0    | 19   | 77   |
| ENSMUSG00000025468.15  | Caly          | 0.005868739 | 0.039315509 | 4 | 6 | 25.5    | 4.666666667 | 20.83333333 | 2.398947986 | 2.834532592 | Higher in Normal | 74   | 9    | 17   | 2     | 3     | 3   | 0   | 1    | 7    | 14   |
| ENSMUSG00000005373.13  | Mlncpl        | 0.005869952 | 0.039315509 | 4 | 6 | 2454    | 317.6666667 | 2136.333333 | 2.579265516 | 3.158451906 | Higher in Normal | 7063 | 2429 | 181  | 143   | 187   | 251 | 60  | 19   | 1319 | 70   |
| ENSMUSG00000097364.1   | Gm26719       | 0.005871535 | 0.039317464 | 4 | 6 | 71.25   | 14.16666667 | 57.08333333 | 2.490877825 | 2.993494093 | Higher in Normal | 83   | 192  | 8    | 2     | 4     | 4   | 3   | 2    | 35   | 37   |
| ENSMUSG00000036357.5   | Gpr101        | 0.005886902 | 0.039368416 | 4 | 6 | 8       | 1.166666667 | 6.833333333 | 2.448775804 | 2.926252835 | Higher in Normal | 5    | 3    | 14   | 10    | 1     | 0   | 0   | 0    | 4    | 2    |
| ENSMUSG000000085333.1  | 170003A011Rik | 0.005903284 | 0.039451974 | 4 | 6 | 7.75    | 0.166666667 | 7.583333333 | 3.153462202 | 4.806016633 | Higher in Normal | 9    | 0    | 18   | 4     | 0     | 0   | 0   | 0    | 1    | 0    |
| ENSMUSG00000000182.9   | Fgf23         | 0.005908987 | 0.039481424 | 4 | 6 | 303.25  | 36.5        | 266.75      | 3.128669145 | 4.128669145 | Higher in Normal | 27   | 12   | 580  | 594   | 5     | 17  | 29  | 0    | 121  | 47   |
| ENSMUSG00000038044.8   | Ctcb1         | 0.005911263 | 0.039487965 | 4 | 6 | 9.25    | 0.5         | 8.75        | 3.005616955 | 4.317948959 | Higher in Normal | 25   | 1    | 11   | 0     | 0     | 1   | 0   | 0    | 1    | 1    |
| ENSMUSG00000108950.1   | 9130015G15Rik | 0.00593726  | 0.039635538 | 4 | 6 | 11.5    | 1.833333333 | 9.666666667 | 2.351660705 | 2.761411616 | Higher in Normal | 18   | 3    | 19   | 6     | 2     | 0   | 0   | 0    | 1    | 6    |
| ENSMUSG00000110929.1   | Gm47757       | 0.005973655 | 0.039843489 | 4 | 6 | 52.75   | 8.166666667 | 44.58333333 | 2.531742618 | 3.072995761 | Higher in Normal | 72   | 78   | 28   | 33    | 17    | 0   | 0   | 0    | 15   | 17   |
| ENSMUSG000000083534.1  | H2-M6-ps      | 0.005988291 | 0.039906211 | 4 | 6 | 12      | 2           | 10          | 2.494494697 | 3.004660755 | Higher in Normal | 28   | 3    | 14   | 3     | 0     | 0   | 1   | 2    | 1    | 8    |
| ENSMUSG00000040935.12  | Pad16         | 0.005998905 | 0.039959453 | 4 | 6 | 53      | 4.666666667 | 48.33333333 | 2.94654089  | 4.04243794  | Higher in Normal | 163  | 0    | 48   | 1     | 2     | 2   | 0   | 0    | 0    | 7    |
| ENSMUSG00000114132.1   | Gm4808        | 0.006024748 | 0.040094933 | 4 | 6 | 12.75   | 0.333333333 | 12.41666667 | 3.203430026 | 5.105563908 | Higher in Normal | 38   | 1    | 12   | 0     | 0     | 0   | 0   | 0    | 2    | 0    |
| ENSMUSG00000056605.6   | Krt72         | 0.006073194 | 0.040380778 | 4 | 6 | 13      | 1           | 12          | 2.954091429 | 4.068308166 | Higher in Normal | 6    | 0    | 32   | 14    | 0     | 0   | 0   | 0    | 2    | 4    |
| ENSMUSG00000009958.1   | 1700010B13Rik | 0.006075177 | 0.040380778 | 4 | 6 | 25.75   | 3.666666667 | 22.08333333 | 2.627601578 | 3.263866028 | Higher in Normal | 75   | 1    | 26   | 1     | 2     | 2   | 0   | 0    | 4    | 13   |
| ENSMUSG00000085653.7   | Gm15179       | 0.006091711 | 0.040400886 | 4 | 6 | 21.25   | 2.5         | 18.75       | 2.698996157 | 3.424976696 | Higher in Normal | 50   | 17   | 18   | 0     | 0     | 2   | 5   | 0    | 0    | 7    |
| ENSMUSG000000091754.8  | Gm3636        | 0.006140713 | 0.040663845 | 4 | 6 | 93.25   | 7.666666667 | 85.58333333 | 3.424363113 | 3.30297619  | Higher in Normal | 2    | 33   | 138  | 200   | 0     | 6   | 12  | 13   | 15   | 0    |
| ENSMUSG00000033156.9   | Cst10         | 0.006149566 | 0.040695935 | 4 | 6 | 7.25    | 0.166666667 | 7.083333333 | 3.157445003 | 5.005579661 | Higher in Normal | 7    | 18   | 0    | 4     | 1     | 0   | 0   | 0    | 0    | 0    |
| ENSMUSG00000004894.10  | Haplnc2       | 0.006172228 | 0.040828155 | 4 | 6 | 17.25   | 1.666666667 | 15.58333333 | 2.750321911 | 3.549843359 | Higher in Normal | 41   | 1    | 25   | 2     | 4     | 0   | 0   | 0    | 3    | 3    |
| ENSMUSG00000106609.1   | Gm43181       | 0.006178522 | 0.04085204  | 4 | 6 | 1       | 13          | 12          | 2.64290769  | 3.400911301 | Higher in TRIM24 | 4    | 0    | 0    | 0     | 2     | 9   | 15  | 1    | 23   | 28   |
| ENSMUSG00000028766.10  | Alpl          | 0.006183059 | 0.040864291 | 4 | 6 | 5542.75 | 597.3333333 | 4945.416667 | 2.554258977 | 3.121502815 | Higher in Normal | 826  | 1395 | 8977 | 10973 | 1358  | 19  | 120 | 58   | 1994 | 35   |
| ENSMUSG00000035653.16  | Lrn5          | 0.006214776 | 0.041020486 | 4 | 6 | 87.75   | 19.5        | 68.25       | 2.330443523 | 2.724433911 | Higher in Normal | 122  | 30   | 99   | 100   | 9     | 1   | 1   | 0    | 38   | 68   |
| ENSMUSG000000041857.10 | Oosp1         | 0.006216887 | 0.041025322 | 4 | 6 | 28      | 5.666666667 | 22.33333333 | 2.532492491 | 3.076399753 | Higher in Normal | 59   | 40   | 9    | 4     | 0     | 0   | 2   | 1    | 8    | 23   |
| ENSMUSG00000086181.1   | C230034O21Rik | 0.006229633 | 0.041075322 | 4 | 6 | 26      | 1.5         | 14.5        | 2.667550937 | 3.370226303 | Higher in Normal | 18   | 1    | 35   | 10    | 0     | 0   | 3   | 1    | 5    | 0    |
| ENSMUSG000000085180.1  | Alb38599      | 0.006238607 | 0.041108251 | 4 | 6 | 137     | 43.83333333 | 193.1666667 | 2.37223774  | 2.796405772 | Higher in Normal | 379  | 231  | 212  | 126   | 10    | 7   | 0   | 11   | 184  | 51   |
| ENSMUSG00000032987.9   | Oftr281       | 0.006253332 | 0.041167888 | 4 | 6 | 31      | 4           | 27          | 2.819667089 | 3.698742144 | Higher in Normal | 88   | 6    | 29   | 1     | 1     | 0   | 0   | 0    | 5    | 18   |
| ENSMUSG00000026166.14  | Ccl20         | 0.006258218 | 0.041182308 | 4 | 6 | 94.25   | 12.83333333 | 81.41666667 | 2.340456997 | 2.744552455 | Higher in Normal | 15   | 5    | 143  | 214   | 16    | 1   | 20  | 4    | 33   | 3    |
| ENSMUSG00000110390.1   | Gm45869       | 0.006261645 | 0.041186986 | 4 | 6 | 7.75    | 1.333333333 | 6.416666667 | 2.416423549 | 2.881624954 | Higher in Normal | 10   | 12   | 6    | 3     | 2     | 0   | 0   | 0    | 3    | 3    |
| ENSMUSG000000092494.1  | Gm20420       | 0.006274359 | 0.04124389  | 4 | 6 | 8.75    | 0.833333333 | 7.916666667 | 2.811629602 | 3.736569598 | Higher in Normal | 24   | 1    | 9    | 1     | 0     | 1   | 0   | 0    | 0    | 3    |
| ENSMUSG00000095774.2   | Oftr970       | 0.006293541 | 0.041325395 | 4 | 6 | 10.25   | 0.666666667 | 9.583333333 | 2.974896817 | 4.17305133  | Higher in Normal | 33   | 2    | 6    | 0     | 0     | 0   | 1   | 0    | 2    | 1    |
| ENSMUSG000000078575.2  | Gm12887       | 0.00639319  | 0.041808385 | 4 | 6 | 33      | 5.5         | 27.5        | 2.645513425 | 3.305322332 | Higher in Normal | 51   | 28   | 30   | 23    | 0     | 0   | 0   | 0    | 11   | 22   |
| ENSMUSG00000029699.3   | Fam166a       | 0.006490376 | 0.04232576  | 4 | 6 | 7.5     | 1           | 6.5         | 2.583309154 | 3.191787855 | Higher in Normal | 7    | 2    | 10   | 11    | 0     | 0   | 0   | 0    | 3    | 3    |
| ENSMUSG00000102364.1   | Igkv8-5       | 0.006495691 | 0.042351351 | 4 | 6 | 15.25   | 2           | 13.25       | 2.387797433 | 2.843121132 | Higher in Normal | 19   | 1    | 16   | 25    | 5     | 2   | 2   | 0    | 0    | 3    |
| ENSMUSG00000075465.2   | Gm10837       |             |             |   |   |         |             |             |             |             |                  |      |      |      |       |       |     |     |      |      |      |



|                       |               |             |             |   |   |          |             |             |             |             |                  |       |     |        |        |      |      |      |     |       |      |
|-----------------------|---------------|-------------|-------------|---|---|----------|-------------|-------------|-------------|-------------|------------------|-------|-----|--------|--------|------|------|------|-----|-------|------|
| ENSMUSG00000103965.1  | Gm30173       | 0.007189634 | 0.04550197  | 4 | 6 | 22.75    | 3.333333333 | 19.41666667 | 2.558197418 | 3.167260043 | Higher in Normal | 57    | 28  | 2      | 4      | 4    | 0    | 1    | 0   | 10    | 5    |
| ENSMUSG00000099552.1  | 9830004L10Rik | 0.007215491 | 0.045618207 | 4 | 6 | 10.75    | 1.666666667 | 9.083333333 | 2.567186875 | 3.185330027 | Higher in Normal | 25    | 9   | 8      | 1      | 2    | 0    | 0    | 0   | 2     | 6    |
| ENSMUSG00000097740.1  | E030044B06Rik | 0.007251688 | 0.045791667 | 4 | 6 | 8        | 1           | 7           | 2.591707862 | 3.250256496 | Higher in Normal | 14    | 2   | 7      | 9      | 0    | 0    | 3    | 0   | 0     | 3    |
| ENSMUSG00000096410.2  | Ighv1-19      | 0.007259543 | 0.045811103 | 4 | 6 | 11       | 1.666666667 | 9.333333333 | 2.508180388 | 3.074561534 | Higher in Normal | 1     | 20  | 11     | 12     | 0    | 0    | 4    | 0   | 2     | 4    |
| ENSMUSG00000109328.2  | Offr1438-ps1  | 0.007280976 | 0.045889292 | 4 | 6 | 21.5     | 3           | 18.5        | 2.640870708 | 3.3450247   | Higher in Normal | 73    | 8   | 4      | 1      | 2    | 2    | 0    | 0   | 3     | 11   |
| ENSMUSG00000025955.13 | Akr1cl        | 0.007302261 | 0.046004397 | 4 | 6 | 131.75   | 21          | 110.75      | 2.654907978 | 3.370851251 | Higher in Normal | 138   | 365 | 12     | 12     | 7    | 1    | 2    | 0   | 68    | 48   |
| ENSMUSG00000067704.1  | Wfd1c3        | 0.007310479 | 0.046165653 | 4 | 6 | 7.5      | 1.333333333 | 6.166666667 | 2.396831746 | 2.865770194 | Higher in Normal | 15    | 5   | 6      | 4      | 1    | 0    | 0    | 0   | 3     | 4    |
| ENSMUSG00000078143.3  | Gm17344       | 0.007335988 | 0.046150034 | 4 | 6 | 10.5     | 2.166666667 | 8.333333333 | 2.342893246 | 2.76942262  | Higher in Normal | 27    | 6   | 6      | 3      | 1    | 1    | 1    | 0   | 1     | 9    |
| ENSMUSG00000063157.9  | Csn2          | 0.007339987 | 0.046165653 | 4 | 6 | 87078.25 | 10751.83333 | 76326.41667 | 2.482183398 | 3.020663061 | Higher in Normal | 87493 | 845 | 108687 | 151288 | 5479 | 5082 | 5520 | 235 | 46670 | 1525 |
| ENSMUSG00000082771.1  | Gm12803       | 0.007378116 | 0.046388463 | 4 | 6 | 8.25     | 0.333333333 | 7.916666667 | 3.064980402 | 4.686184303 | Higher in Normal | 27    | 5   | 0      | 1      | 1    | 0    | 0    | 0   | 0     | 1    |
| ENSMUSG00000089301.1  | Gm24841       | 0.007392603 | 0.045637256 | 4 | 6 | 7.75     | 0.166666667 | 7.583333333 | 3.143226333 | 4.965315539 | Higher in Normal | 23    | 1   | 7      | 0      | 0    | 0    | 0    | 0   | 0     | 1    |
| ENSMUSG00000073063.3  | Hbq1b         | 0.007413713 | 0.046466187 | 4 | 6 | 21.5     | 2.333333333 | 19.16666667 | 2.655072151 | 3.397677792 | Higher in Normal | 70    | 10  | 6      | 0      | 0    | 4    | 2    | 1   | 1     | 6    |
| ENSMUSG00000060560.8  | Ces4a         | 0.007435182 | 0.046542429 | 4 | 6 | 61       | 6.666666667 | 54.33333333 | 2.883089856 | 3.969078346 | Higher in Normal | 184   | 2   | 56     | 2      | 0    | 1    | 0    | 0   | 9     | 30   |
| ENSMUSG00000084863.1  | Gm12523       | 0.007438106 | 0.046542429 | 4 | 6 | 5.75     | 0.5         | 5.25        | 2.865013539 | 3.845070835 | Higher in Normal | 14    | 6   | 1      | 2      | 0    | 0    | 0    | 0   | 1     | 2    |
| ENSMUSG00000098284.7  | A330093E20Rik | 0.007445107 | 0.04656945  | 4 | 6 | 9.25     | 1.333333333 | 7.916666667 | 2.453612019 | 2.985731925 | Higher in Normal | 19    | 1   | 13     | 4      | 0    | 2    | 1    | 0   | 1     | 4    |
| ENSMUSG00000109847.1  | Gm45278       | 0.007445484 | 0.04656945  | 4 | 6 | 8.75     | 1.333333333 | 7.416666667 | 2.462697345 | 2.999119811 | Higher in Normal | 21    | 5   | 8      | 1      | 0    | 1    | 1    | 0   | 3     | 3    |
| ENSMUSG00000103658.1  | Gm37201       | 0.007489963 | 0.046751621 | 4 | 6 | 0.5      | 6.5         | 6           | 2.617085318 | 3.472987499 | Higher in Normal | 1     | 1   | 0      | 0      | 11   | 1    | 9    | 1   | 3     | 14   |
| ENSMUSG00000035551.6  | Igf1p1        | 0.007491977 | 0.046754603 | 4 | 6 | 21.5     | 3.666666667 | 17.83333333 | 2.465674032 | 2.991527297 | Higher in Normal | 49    | 4   | 18     | 15     | 0    | 0    | 0    | 2   | 9     | 11   |
| ENSMUSG00000064263.6  | Plat26        | 0.007550008 | 0.047039624 | 4 | 6 | 9.25     | 0.5         | 8.75        | 3.091158306 | 4.685534368 | Higher in Normal | 19    | 12  | 6      | 0      | 0    | 0    | 0    | 0   | 0     | 3    |
| ENSMUSG00000101695.1  | 1700094I05Rik | 0.007557537 | 0.047067272 | 4 | 6 | 6        | 0.5         | 5.5         | 2.797316362 | 3.688028898 | Higher in Normal | 13    | 1   | 7      | 3      | 0    | 0    | 0    | 0   | 2     | 1    |
| ENSMUSG00000042631.7  | Xkr7          | 0.007626272 | 0.047391505 | 4 | 6 | 14.75    | 0.666666667 | 14.08333333 | 3.125138075 | 5.027921241 | Higher in Normal | 40    | 1   | 18     | 0      | 0    | 0    | 0    | 0   | 0     | 4    |
| ENSMUSG00000107350.1  | Gm19610       | 0.007636982 | 0.047435909 | 4 | 6 | 4.25     | 48.16666667 | 43.91666667 | 2.475391128 | 3.064721272 | Higher in TRIM24 | 10    | 0   | 2      | 5      | 0    | 6    | 22   | 45  | 42    | 174  |
| ENSMUSG00000026514.14 | Cnih3         | 0.007723862 | 0.047731345 | 4 | 6 | 34       | 7.166666667 | 26.83333333 | 2.378653576 | 2.837373526 | Higher in Normal | 81    | 6   | 32     | 17     | 4    | 0    | 0    | 1   | 10    | 28   |
| ENSMUSG00000105713.1  | Gm43827       | 0.007767973 | 0.047899002 | 4 | 6 | 8.75     | 0.333333333 | 8.416666667 | 3.010970469 | 4.528172248 | Higher in Normal | 19    | 1   | 15     | 0      | 1    | 0    | 0    | 0   | 1     | 0    |
| ENSMUSG00000108141.1  | Gm44079       | 0.007817377 | 0.048124441 | 4 | 6 | 22.5     | 2.666666667 | 19.83333333 | 2.771833426 | 3.685844172 | Higher in Normal | 46    | 41  | 1      | 2      | 0    | 1    | 0    | 0   | 8     | 7    |
| ENSMUSG00000097671.2  | 1700015O11Rik | 0.007823024 | 0.048130014 | 4 | 6 | 9.5      | 0.666666667 | 8.833333333 | 2.95715818  | 4.231914169 | Higher in Normal | 28    | 5   | 5      | 0      | 0    | 0    | 0    | 0   | 2     | 2    |
| ENSMUSG00000087410.7  | Z310065F04Rik | 0.007864494 | 0.048325018 | 4 | 6 | 25       | 3.5         | 21.5        | 2.729537284 | 3.569581351 | Higher in Normal | 78    | 15  | 7      | 0      | 1    | 0    | 2    | 0   | 3     | 15   |
| ENSMUSG00000106514.1  | Mir6976       | 0.007916309 | 0.048492606 | 4 | 6 | 5        | 0.333333333 | 4.666666667 | 2.811191335 | 3.749925687 | Higher in Normal | 1     | 2   | 11     | 6      | 0    | 0    | 0    | 0   | 1     | 1    |
| ENSMUSG00000036816.4  | Atoh7         | 0.007932726 | 0.048569405 | 4 | 6 | 12.25    | 2.166666667 | 10.08333333 | 2.552300746 | 3.171399203 | Higher in Normal | 18    | 19  | 11     | 1      | 1    | 0    | 0    | 0   | 3     | 9    |
| ENSMUSG00000073094.9  | Smim9         | 0.007959246 | 0.048653508 | 4 | 6 | 6        | 0.833333333 | 5.166666667 | 2.492350537 | 3.082543809 | Higher in Normal | 15    | 4   | 2      | 3      | 1    | 0    | 0    | 1   | 1     | 2    |
| ENSMUSG00000111495.1  | Gm5366        | 0.00806678  | 0.049133289 | 4 | 6 | 15.5     | 0.833333333 | 14.66666667 | 3.085280722 | 4.90747317  | Higher in Normal | 46    | 0   | 14     | 2      | 0    | 0    | 0    | 0   | 0     | 5    |
| ENSMUSG00000100212.1  | Gm5522        | 0.008090575 | 0.049236981 | 4 | 6 | 6.5      | 0.166666667 | 6.333333333 | 3.029886345 | 4.689786405 | Higher in Normal | 7     | 7   | 12     | 0      | 0    | 1    | 0    | 0   | 0     | 0    |
| ENSMUSG00000030834.7  | Abcc6         | 0.008102359 | 0.049251473 | 4 | 6 | 37       | 7           | 30          | 2.492250109 | 3.059099132 | Higher in Normal | 99    | 5   | 31     | 13     | 0    | 4    | 1    | 0   | 4     | 33   |
| ENSMUSG00000112047.1  | Gm47852       | 0.008168901 | 0.049547149 | 4 | 6 | 7.25     | 0.333333333 | 6.916666667 | 2.978726399 | 4.436727701 | Higher in Normal | 21    | 2   | 6      | 0      | 0    | 0    | 0    | 1   | 0     | 1    |
| ENSMUSG00000054013.6  | Tmem179       | 0.008175303 | 0.049576106 | 4 | 6 | 258.75   | 49          | 209.75      | 2.331851879 | 2.769559861 | Higher in Normal | 408   | 599 | 15     | 13     | 12   | 11   | 14   | 48  | 159   | 50   |
| ENSMUSG00000065515.1  | Mir152        | 0.008179016 | 0.049578875 | 4 | 6 | 7.75     | 0           | 7.75        | 3.147202519 | 5.410761425 | Higher in Normal | 18    | 2   | 11     | 0      | 0    | 0    | 0    | 0   | 0     | 0    |
| ENSMUSG00000113702.1  | Gm35558       | 0.008213009 | 0.049690291 | 4 | 6 | 11.25    | 1.833333333 | 9.416666667 | 2.384465203 | 2.872963327 | Higher in Normal | 32    | 8   | 1      | 4      | 2    | 1    | 1    | 0   | 4     | 3    |
| ENSMUSG00000056600.4  | Offr90        | 0.008225334 | 0.049750691 | 4 | 6 | 26.5     | 5           | 21.5        | 2.535360808 | 3.14467468  | Higher in Normal | 80    | 6   | 15     | 5      | 1    | 0    | 1    | 5   | 23    |      |
| ENSMUSG00000034533.10 | Scn10a        | 0.00823921  | 0.049795052 | 4 | 6 | 40.25    | 8           | 32.25       | 2.32324719  | 2.757119444 | Higher in Normal | 129   | 11  | 20     | 1      | 3    | 6    | 1    | 4   | 5     | 29   |
| ENSMUSG00000050087.3  | Cby3          | 0.008277922 | 0.049949694 | 4 | 6 | 7.25     | 1           | 6.25        | 2.583600907 | 3.264102838 | Higher in Normal | 19    | 2   | 5      | 3      | 0    | 0    | 1    | 1   | 1     | 4    |
| ENSMUSG00000086645.2  | Gm15743       | 0.008285731 | 0.049986909 | 4 | 6 | 19.25    | 2.5         | 16.75       | 2.603605706 | 3.305000528 | Higher in Normal | 56    | 5   | 14     | 2      | 0    | 2    | 0    | 0   | 7     | 6    |
