# Supplementary material for: Mammary-specific expression of Trim24 establishes a mouse model of human metaplastic breast cancer
Source: PubMed Central journal article supplement (PMC8433435; doi:10.1038/s41467-021-25650-z), 2021-09-10
Supplement: 41467_2021_25650_MOESM11_ESM.pdf [file 41467_2021_25650_MOESM11_ESM.pdf]

Supplementary Table 8: A murine TRIM24 signature and its correlation to human TNBC MpBC patient signature.

| Gene ID               | Gene Name     | p.value  | FDR         | Num Samples NONMETA | Num Samples META | Mean NONMETA | Mean META   | Delta       | Log <sub>2</sub> Fold Change | Log <sub>2</sub> Fold Change (MLE) | Direction      | Carcinoma | Carcinoma.1 | Carcinoma.2 | Carcinosarcoma | Carcinosarcoma.1 | Carcinosarcoma.2 |
|-----------------------|---------------|----------|-------------|---------------------|------------------|--------------|-------------|-------------|------------------------------|------------------------------------|----------------|-----------|-------------|-------------|----------------|------------------|------------------|
| ENSMUSG00000048616.4  | Nog           | 7.41E-17 | 3.71E-14    | 3                   | 3                | 8            | 343.333333  | 335.333333  | 4.97324476                   | 5.004602774                        | Higher in META | 4         | 10          | 10          | 366            | 268              | 396              |
| ENSMUSG00000028480.14 | Glipr2        | 2.84E-14 | 8.09E-12    | 3                   | 3                | 863          | 6167.666667 | 5304.666667 | 2.298060284                  | 2.364787371                        | Higher in META | 739       | 561         | 1289        | 6116           | 3229             | 9158             |
| ENSMUSG00000038402.2  | Foxf2         | 1.37E-13 | 3.49E-11    | 3                   | 3                | 31.33333333  | 837.3333333 | 806         | 4.021524664                  | 4.464837712                        | Higher in META | 15        | 13          | 66          | 511            | 754              | 1247             |
| ENSMUSG00000044303.6  | Cdkn2a        | 2.90E-13 | 7.15E-11    | 3                   | 3                | 2823         | 34839       | 32016       | 2.865736855                  | 3.012449748                        | Higher in META | 3687      | 1385        | 3397        | 22212          | 16559            | 65746            |
| ENSMUSG00000035062.3  | Zc4h2         | 5.52E-13 | 1.28E-10    | 3                   | 3                | 76           | 546.666667  | 470.666667  | 2.255348808                  | 2.325989156                        | Higher in META | 75        | 57          | 96          | 442            | 338              | 860              |
| ENSMUSG00000023234.14 | Matn2         | 5.57E-13 | 1.28E-10    | 3                   | 3                | 924.3333333  | 6516.333333 | 5592        | 2.131384064                  | 2.190469885                        | Higher in META | 976       | 710         | 1087        | 4918           | 3106             | 11525            |
| ENSMUSG00000001555.10 | Fkbp10        | 8.91E-13 | 1.91E-10    | 3                   | 3                | 2017         | 13716.66667 | 11699.66667 | 2.261907671                  | 2.334413057                        | Higher in META | 1821      | 1623        | 2607        | 11645          | 10827            | 18678            |
| ENSMUSG00000044499.11 | Hs3st5        | 7.79E-12 | 1.53E-09    | 3                   | 3                | 4.666666667  | 169         | 164.3333333 | 3.997320994                  | 4.555844088                        | Higher in META | 2         | 5           | 7           | 141            | 69               | 297              |
| ENSMUSG00000026873.9  | Phf19         | 4.88E-11 | 8.65E-09    | 3                   | 3                | 120.3333333  | 773.6666667 | 653.3333333 | 2.132068194                  | 2.204086608                        | Higher in META | 132       | 75          | 154         | 748            | 443              | 1130             |
| ENSMUSG00000026207.16 | Speg          | 6.08E-11 | 1.05E-08    | 3                   | 3                | 246          | 2487        | 2241        | 2.751006654                  | 2.915249799                        | Higher in META | 129       | 164         | 445         | 2422           | 1373             | 3666             |
| ENSMUSG00000037032.16 | Apbb1         | 2.39E-10 | 3.82E-08    | 3                   | 3                | 211          | 1547.666667 | 1336.666667 | 2.354598715                  | 2.461511751                        | Higher in META | 267       | 125         | 241         | 1461           | 1155             | 2027             |
| ENSMUSG00000026069.15 | Il1r1         | 3.49E-10 | 5.39E-08    | 3                   | 3                | 110          | 5002.666667 | 4892.666667 | 4.031003147                  | 4.728306646                        | Higher in META | 75        | 57          | 198         | 722            | 1708             | 12578            |
| ENSMUSG00000026764.15 | Kif5c         | 3.56E-10 | 5.45E-08    | 3                   | 3                | 83.66666667  | 796.6666667 | 713         | 2.766776842                  | 2.951075307                        | Higher in META | 64        | 50          | 137         | 986            | 553              | 851              |
| ENSMUSG00000054196.6  | Cthrc1        | 4.54E-10 | 6.80E-08    | 3                   | 3                | 1019.666667  | 8950        | 7930.333333 | 2.530478123                  | 2.669942869                        | Higher in META | 626       | 586         | 1847        | 5603           | 5589             | 15658            |
| ENSMUSG00000038319.14 | Kcnn2         | 1.70E-09 | 2.33E-07    | 3                   | 3                | 18.33333333  | 645         | 626.6666667 | 4.132308539                  | 5.013435946                        | Higher in META | 19        | 5           | 31          | 1312           | 349              | 274              |
| ENSMUSG00000026637.13 | Traf5         | 2.51E-09 | 3.35E-07    | 3                   | 3                | 235.3333333  | 1966.333333 | 1731        | 2.314227471                  | 2.429764622                        | Higher in META | 168       | 169         | 369         | 1184           | 864              | 3851             |
| ENSMUSG00000042604.5  | Kcna4         | 2.67E-09 | 3.50E-07    | 3                   | 3                | 6.333333333  | 610         | 603.6666667 | 4.479883373                  | 5.841013573                        | Higher in META | 1         | 2           | 16          | 172            | 104              | 1554             |
| ENSMUSG00000043441.5  | Gpr149        | 3.87E-09 | 4.94E-07    | 3                   | 3                | 802.3333333  | 799.3333333 | 4.785817981 | 7.006887188                  | Higher in META                     | 6              | 1         | 2           | 266         | 20             | 2121             |                  |
| ENSMUSG00000037293.4  | Nudt10        | 4.97E-09 | 6.17E-07    | 3                   | 3                | 4.666666667  | 218.6666667 | 214         | 4.256189497                  | 5.409144162                        | Higher in META | 4         | 3           | 7           | 420            | 169              | 67               |
| ENSMUSG00000007039.12 | Ddah2         | 1.01E-08 | 1.17E-06    | 3                   | 3                | 1277         | 6261.666667 | 4984.666667 | 1.729752527                  | 1.779896208                        | Higher in META | 1316      | 708         | 1807        | 4530           | 3615             | 10640            |
| ENSMUSG00000038523.10 | 1700003F12Rik | 2.18E-08 | 2.37E-06    | 3                   | 3                | 31.33333333  | 298.6666667 | 267.3333333 | 2.702550566                  | 2.92561019                         | Higher in META | 20        | 24          | 50          | 348            | 224              | 324              |
| ENSMUSG00000033906.5  | Zdhc15        | 2.73E-08 | 2.92E-06    | 3                   | 3                | 73.33333333  | 761         | 687.6666667 | 2.845545357                  | 3.115191618                        | Higher in META | 95        | 39          | 86          | 538            | 898              | 847              |
| ENSMUSG00000001020.8  | S100a4        | 4.96E-08 | 5.00E-06    | 3                   | 3                | 31           | 1412.666667 | 1381.666667 | 3.824803793                  | 4.696611295                        | Higher in META | 9         | 29          | 55          | 176            | 583              | 3479             |
| ENSMUSG00000022261.5  | Sdc2          | 5.88E-08 | 5.78E-06    | 3                   | 3                | 2642.333333  | 27257       | 24614.66667 | 2.610193295                  | 2.823000317                        | Higher in META | 1923      | 3084        | 2920        | 13529          | 25015            | 43227            |
| ENSMUSG00000059625.6  | Sohih1        | 6.16E-08 | 5.97E-06    | 3                   | 3                | 0.333333333  | 61.33333333 | 61          | 4.435137031                  | 7.083032923                        | Higher in META | 1         | 0           | 0           | 34             | 75               | 75               |
| ENSMUSG00000028186.14 | Uox           | 1.02E-07 | 9.51E-06    | 3                   | 3                | 144          | 1394        | 1250        | 2.484569689                  | 2.673392711                        | Higher in META | 75        | 179         | 178         | 1077           | 889              | 2216             |
| ENSMUSG00000019775.17 | Rgs17         | 1.36E-07 | 1.24E-05    | 3                   | 3                | 25.33333333  | 700.6666667 | 675.3333333 | 3.646503966                  | 4.439073678                        | Higher in META | 3         | 20          | 53          | 1098           | 243              | 761              |
| ENSMUSG00000054932.6  | Afp           | 1.41E-07 | 1.28E-05    | 3                   | 3                | 12.66666667  | 436.6666667 | 424         | 3.988673344                  | 5.206943264                        | Higher in META | 7         | 10          | 21          | 158            | 976              | 176              |
| ENSMUSG00000031520.6  | Vegfc         | 2.20E-07 | 1.88E-05    | 3                   | 3                | 540.6666667  | 4600        | 4059.333333 | 2.608283106                  | 2.844895099                        | Higher in META | 348       | 487         | 787         | 5351           | 4699             | 3750             |
| ENSMUSG00000022996.14 | Wnt10b        | 2.73E-07 | 2.30E-05    | 3                   | 3                | 23.33333333  | 490         | 466.6666667 | 3.244487506                  | 3.774636939                        | Higher in META | 9         | 10          | 51          | 333            | 9                | 1032             |
| ENSMUSG00000068923.14 | Syt11         | 3.46E-07 | 2.83E-05    | 3                   | 3                | 357          | 2192.666667 | 1835.666667 | 2.197641047                  | 2.336450369                        | Higher in META | 219       | 211         | 641         | 2055           | 1830             | 2693             |
| ENSMUSG00000047181.12 | Samd14        | 6.66E-07 | 5.14E-05    | 3                   | 3                | 607.3333333  | 2170.666667 | 1563.333333 | 1.273456985                  | 1.299602324                        | Higher in META | 607       | 457         | 758         | 1821           | 1249             | 3442             |
| ENSMUSG00000070858.12 | Gm1673        | 6.86E-07 | 5.25E-05    | 3                   | 3                | 54           | 630.6666667 | 576.6666667 | 2.861417629                  | 3.226960845                        | Higher in META | 16        | 54          | 92          | 714            | 522              | 656              |
| ENSMUSG00000028541.14 | B4galnt2      | 6.96E-07 | 5.30E-05    | 3                   | 3                | 552          | 2156.666667 | 1604.666667 | 1.511960534                  | 1.556640212                        | Higher in META | 515       | 337         | 804         | 2009           | 1465             | 2996             |
| ENSMUSG00000026674.9  | Ddr2          | 8.13E-07 | 6.07E-05    | 3                   | 3                | 865.3333333  | 9896        | 9030.666667 | 2.920215576                  | 2.920215576                        | Higher in META | 411       | 702         | 1483        | 3154           | 6429             | 20105            |
| ENSMUSG00000032561.15 | Acpp          | 8.15E-07 | 6.07E-05    | 3                   | 3                | 316.3333333  | 5063        | 4746.666667 | 2.860879109                  | 3.231436407                        | Higher in META | 115       | 304         | 530         | 3492           | 1056             | 10641            |
| ENSMUSG00000047878.12 | A4galnt       | 9.92E-07 | 7.21E-05    | 3                   | 3                | 310.6666667  | 1466.333333 | 1155.666667 | 1.806406709                  | 1.887122207                        | Higher in META | 233       | 204         | 495         | 1274           | 1188             | 1937             |
| ENSMUSG00000027254.13 | Map1a         | 1.14E-06 | 8.16E-05    | 3                   | 3                | 275          | 2519        | 2244        | 2.594192426                  | 2.865069941                        | Higher in META | 99        | 263         | 463         | 2924           | 1961             | 2672             |
| ENSMUSG00000046814.3  | Gchfr         | 1.33E-06 | 9.23E-05    | 3                   | 3                | 210.6666667  | 1236        | 1025.333333 | 1.854762549                  | 1.944974421                        | Higher in META | 133       | 199         | 300         | 918            | 629              | 2161             |
| ENSMUSG00000038916.7  | Soga3         | 1.33E-06 | 9.23E-05    | 3                   | 3                | 0            | 43.33333333 | 43.33333333 | 4.196644242                  | 7.594470996                        | Higher in META | 0         | 0           | 0           | 28             | 56               | 46               |
| ENSMUSG00000029223.12 | Uchl1         | 1.42E-06 | 9.67E-05    | 3                   | 3                | 55           | 1498.666667 | 1443.666667 | 3.573588835                  | 4.553500233                        | Higher in META | 54        | 68          | 43          | 2608           | 1686             | 202              |
| ENSMUSG00000042847.11 | Serpinb6b     | 1.44E-06 | 9.76E-05    | 3                   | 3                | 171.3333333  | 1961.666667 | 1790.333333 | 2.548276078                  | 2.808887141                        | Higher in META | 72        | 144         | 298         | 1238           | 571              | 4076             |
| ENSMUSG00000029718.14 | Pcolce        | 1.52E-06 | 0.000102083 | 3                   | 3                | 3672         | 25501.66667 | 21829.66667 | 2.239678643                  | 2.408634712                        | Higher in META | 2651      | 2524        | 5841        | 11417          | 24725            | 40363            |
| ENSMUSG00000034118.15 | Tpst1         | 1.52E-06 | 0.000102083 | 3                   | 3                | 882          | 3222.666667 | 2340.666667 | 1.407024901                  | 1.445206664                        | Higher in META | 852       | 601         | 1193        | 3068           | 2225             | 4375             |
| ENSMUSG00000042817.15 | Flt3          | 1.55E-06 | 0.00010355  | 3                   | 3                | 84.33333333  | 957.3333333 | 873         | 2.860651591                  | 3.257163092                        | Higher in META | 4         | 20          | 185         | 1276           | 428              | 1168             |
| ENSMUSG00000029185.14 | Fam114a1      | 1.60E-06 | 0.000106397 | 3                   | 3                | 196.6666667  | 6554.666667 | 4608        | 1.198277438                  | 1.221605918                        | Higher in META | 178       | 1456        | 2635        | 5116           | 3895             | 10653            |
| ENSMUSG00000033065.13 | Pfkm          | 1.76E-06 | 0.000114948 | 3                   | 3                | 1238         | 6671.666667 | 5433.666667 | 1.82457668                   | 1.912349154                        | Higher in META | 1759      | 664         | 1291        | 5325           | 4144             | 10546            |
| ENSMUSG00000066456.14 | Hmgn3         | 1.79E-06 | 0.000116069 | 3                   | 3                | 279.3333333  | 1647        | 1367.666667 | 2.148310761                  | 2.297717419                        | Higher in META | 218       | 122         | 498         | 1266           | 1507             | 2168             |
| ENSMUSG00000028167.15 | Bdh2          | 2.24E-06 | 0.000140055 | 3                   | 3                | 53.66666667  | 555.3333333 | 501.6666667 | 2.819680369                  | 3.212323273                        | Higher in META | 30        | 27          | 104         | 260            | 704              | 689              |
| ENSMUSG00000004837.2  | Grap          | 2.26E-06 | 0.000141003 | 3                   | 3                | 215.3333333  | 998.3333333 | 783         | 1.737088664                  | 1.813941437                        | Higher in META | 168       | 173         | 305         | 1066           | 717              | 1225             |
| ENSMUSG00000032625.14 | Thsd7a        | 2.27E-06 | 0.000141003 | 3                   | 3                | 82.33333333  | 842.3333333 | 760         | 2.816741612                  | 3.208085224                        | Higher in META | 36        | 34          | 177         | 468            | 977              | 1082             |
| ENSMUSG00000023827.8  | Agpat4        | 2.40E-06 | 0.00014741  | 3                   | 3                | 395.6666667  | 2424.666667 | 2029        | 1.97395898                   | 2.090598681                        | Higher in META | 269       | 458         | 460         | 2309           | 1676             | 3289             |
| ENSMUSG00000028214.13 | Gem           | 2.51E-06 | 0.000152432 | 3                   | 3                | 177.3333333  | 2291.666667 | 2114.333333 | 2.531653368                  | 2.801766318                        | Higher in META | 146       | 156         | 230         | 916            | 530              | 5429             |
| ENSMUSG00000021318.15 | Gli3          | 2.72E-06 | 0.000165052 | 3                   | 3                | 318          | 1800.333333 | 1482.333333 | 1.783212325                  | 1.868208202                        | Higher in META | 423       | 204         | 327         | 1116           | 949              | 3307             |
| ENSMUSG00000063605.5  | Ccdc102a      | 3.20E-06 | 0.000189145 | 3                   | 3                | 594.6666667  | 2704.333333 | 2109.666667 | 1.794400371                  | 1.717787766                        | Higher in META | 578       | 480         | 726         | 2276           | 2434             | 3403             |
| ENSMUSG00000027994.14 | Mcub          | 4.21E-06 | 0.00024002  | 3                   | 3                | 173.3333333  | 2054.666667 | 1881.333333 | 2.508043589                  | 2.785151596                        | Higher in META | 74        | 250         | 196         | 1570           | 804              | 3790             |
| ENSMUSG00000035385.5  | Ccl2          | 4.23E-06 | 0.00024002  | 3                   | 3                | 728.6666667  | 5848        | 5119.333333 | 2.175188715                  | 2.345154693                        | Higher in META | 391       | 583         | 1212        | 2599           | 2803             | 12142            |
| ENSMUSG00000032101.6  | Ddx25         | 4.43E-06 | 0.000250601 | 3                   | 3                | 14.66666667  | 171.3333333 | 156.6666667 | 2.962110484                  | 3.478832339                        | Higher in META | 13        | 4           | 27          | 179            | 203              | 132              |
| ENSMUSG00000025037.6  | Maoa          | 5.18E-06 | 0.000288311 | 3                   | 3                | 552          | 3803.333333 | 3251.333333 | 2.204993072                  | 2.204993072                        | Higher in META | 766       | 204         | 686         | 2915           | 1596             | 6899             |
| ENSMUSG00000038119.15 | Cdon          | 5.47E-06 | 0.00030713  | 3                   | 3                |              |             |             |                              |                                    |                |           |             |             |                |                  |                  |

|                        |               |             |             |   |   |             |             |             |              |             |                |       |       |       |       |       |       |
|------------------------|---------------|-------------|-------------|---|---|-------------|-------------|-------------|--------------|-------------|----------------|-------|-------|-------|-------|-------|-------|
| ENSMUSG00000019929.16  | Dcn           | 9.70E-06    | 0.000473024 | 3 | 3 | 6283.333333 | 56166.66667 | 49883.33333 | 2.487603812  | 2.784380753 | Higher in META | 1941  | 2828  | 14081 | 33898 | 35763 | 98839 |
| ENSMUSG00000020805.14  | Slc13a5       | 9.73E-06    | 0.000473024 | 3 | 3 | 2.666666667 | 74.66666667 | 72          | 3.44399768   | 4.644284437 | Higher in META | 5     | 0     | 3     | 42    | 105   | 77    |
| ENSMUSG00000022679.13  | Mpv17l        | 1.04E-05    | 0.0005014   | 3 | 3 | 77.33333333 | 348.6666667 | 271.3333333 | 1.551357475  | 1.613897492 | Higher in META | 73    | 63    | 96    | 327   | 173   | 546   |
| ENSMUSG00000027202.20  | Syt13         | 1.18E-05    | 0.000553514 | 3 | 3 | 214.3333333 | 5379        | 5164.666667 | 2.987108733  | 3.598982679 | Higher in META | 250   | 286   | 107   | 3738  | 479   | 11920 |
| ENSMUSG00000063632.6   | Sox11         | 1.18E-05    | 0.000553514 | 3 | 3 | 89          | 1600.333333 | 1511.333333 | 3.182101458  | 3.984914468 | Higher in META | 21    | 11    | 235   | 627   | 1416  | 2758  |
| ENSMUSG00000027811.9   | 4930579G24Rik | 1.23E-05    | 0.000573617 | 3 | 3 | 192.6666667 | 914         | 721.3333333 | 1.794236279  | 1.895637081 | Higher in META | 132   | 150   | 296   | 1017  | 678   | 1047  |
| ENSMUSG00000017314.12  | Mpp2          | 1.41E-05    | 0.000653    | 3 | 3 | 161         | 732.6666667 | 571.6666667 | 1.664233567  | 1.745159725 | Higher in META | 139   | 152   | 192   | 677   | 587   | 934   |
| ENSMUSG00000021384.14  | Susd3         | 1.44E-05    | 0.000658799 | 3 | 3 | 163         | 635.6666667 | 472.6666667 | 1.480696131  | 1.536564678 | Higher in META | 136   | 126   | 227   | 541   | 484   | 882   |
| ENSMUSG00000017466.9   | Timp2         | 1.69E-05    | 0.000754061 | 3 | 3 | 10162.66667 | 63468.33333 | 53305.66667 | 1.892136292  | 2.017069955 | Higher in META | 6989  | 11855 | 11644 | 69744 | 26882 | 93779 |
| ENSMUSG00000054423.13  | Cadps         | 1.73E-05    | 0.000765268 | 3 | 3 | 5.666666667 | 154         | 148.3333333 | 3.454427916  | 4.817127514 | Higher in META | 4     | 6     | 7     | 57    | 362   | 43    |
| ENSMUSG00000035376.9   | Hacd2         | 1.74E-05    | 0.000767917 | 3 | 3 | 1269.666667 | 7077        | 5807.333333 | 2.070010965  | 2.239050618 | Higher in META | 1232  | 992   | 1585  | 8036  | 7540  | 5655  |
| ENSMUSG00000033436.13  | Armcx2        | 1.76E-05    | 0.000777203 | 3 | 3 | 1254.666667 | 5769.333333 | 4514.666667 | 1.649990194  | 1.730525051 | Higher in META | 1618  | 540   | 1606  | 4943  | 3365  | 9000  |
| ENSMUSG00000050288.6   | Fzd2          | 1.94E-05    | 0.000845654 | 3 | 3 | 1191        | 4186        | 2995        | 1.223485253  | 1.255211861 | Higher in META | 1194  | 775   | 1604  | 3615  | 1956  | 6987  |
| ENSMUSG00000039103.12  | Nexn          | 2.28E-05    | 0.000963822 | 3 | 3 | 331.6666667 | 1517.333333 | 1185.666667 | 1.65657884   | 1.740629602 | Higher in META | 187   | 256   | 552   | 1380  | 911   | 2261  |
| ENSMUSG00000009731.4   | Kcnd1         | 2.35E-05    | 0.000987253 | 3 | 3 | 129.6666667 | 664.6666667 | 535         | 1.905591207  | 2.038728572 | Higher in META | 79    | 85    | 225   | 487   | 607   | 900   |
| ENSMUSG00000027834.15  | Serpini1      | 2.60E-05    | 0.001074948 | 3 | 3 | 27          | 151.3333333 | 124.3333333 | 1.979886889  | 2.133108527 | Higher in META | 22    | 15    | 44    | 144   | 113   | 197   |
| ENSMUSG00000007950.9   | Abhd8         | 2.65E-05    | 0.001094484 | 3 | 3 | 1029.333333 | 4339.666667 | 3310.333333 | 1.410088893  | 1.461330807 | Higher in META | 917   | 967   | 1204  | 2786  | 2662  | 7571  |
| ENSMUSG00000007908.14  | Hmgcl1        | 2.74E-05    | 0.00112574  | 3 | 3 | 14.33333333 | 224.3333333 | 210         | 3.072948579  | 3.876384163 | Higher in META | 11    | 5     | 27    | 483   | 117   | 73    |
| ENSMUSG00000028031.6   | Dkk2          | 3.13E-05    | 0.001274971 | 3 | 3 | 303.6666667 | 6256.333333 | 6052.666667 | 3.039435309  | 3.818405335 | Higher in META | 149   | 393   | 369   | 441   | 7032  | 11596 |
| ENSMUSG00000028989.3   | Angptl7       | 3.21E-05    | 0.001297885 | 3 | 3 | 12.33333333 | 241         | 228.6666667 | 2.842200565  | 3.432654337 | Higher in META | 11    | 7     | 19    | 48    | 65    | 610   |
| ENSMUSG00000034520.14  | Gjc1          | 3.40E-05    | 0.001358876 | 3 | 3 | 394.6666667 | 1718.333333 | 1323.666667 | 1.691390904  | 1.785738557 | Higher in META | 426   | 256   | 502   | 2111  | 1270  | 1774  |
| ENSMUSG00000028173.10  | Wls           | 3.56E-05    | 0.001406077 | 3 | 3 | 5648.666667 | 29692       | 24043.33333 | 1.600340789  | 1.679634316 | Higher in META | 4335  | 5274  | 7337  | 17032 | 13039 | 59005 |
| ENSMUSG00000082229.1   | Nap1l2        | 3.59E-05    | 0.001413173 | 3 | 3 | 3.666666667 | 78          | 72.33333333 | 2.840489584  | 3.447722289 | Higher in META | 1     | 4     | 12    | 81    | 53    | 100   |
| ENSMUSG0000002757.15   | Snpb          | 3.83E-05    | 0.001483807 | 3 | 3 | 7.333333333 | 268         | 260.6666667 | 3.394045899  | 4.900815825 | Higher in META | 3     | 9     | 10    | 709   | 65    | 30    |
| ENSMUSG00000019539.11  | Rcn3          | 3.92E-05    | 0.001510477 | 3 | 3 | 1769        | 12174       | 10405       | 2.287598842  | 2.553033212 | Higher in META | 593   | 1429  | 3285  | 10148 | 12984 | 13390 |
| ENSMUSG00000020186.7   | Csrp2         | 3.95E-05    | 0.001513651 | 3 | 3 | 1250        | 8054.333333 | 6804.333333 | 1.94123093   | 2.092404541 | Higher in META | 806   | 962   | 1982  | 2950  | 5178  | 16035 |
| ENSMUSG00000011589.8   | Fsd1          | 4.02E-05    | 0.001529668 | 3 | 3 | 9           | 101         | 92          | 2.801157931  | 3.384228591 | Higher in META | 8     | 6     | 13    | 114   | 133   | 56    |
| ENSMUSG00000042182.16  | Bend6         | 4.04E-05    | 0.001531005 | 3 | 3 | 102.3333333 | 506.3333333 | 404         | 1.9361507079 | 1.956685641 | Higher in META | 136   | 56    | 115   | 458   | 433   | 608   |
| ENSMUSG00000030268.17  | Bcat1         | 4.04E-05    | 0.001531005 | 3 | 3 | 459.6666667 | 3640.333333 | 3180.666667 | 2.14569928   | 2.358871599 | Higher in META | 163   | 512   | 704   | 2116  | 2142  | 6663  |
| ENSMUSG00000033565.16  | Rbfox2        | 4.33E-05    | 0.001592698 | 3 | 3 | 3664.333333 | 11011       | 7346.666667 | 1.075949497  | 1.054035393 | Higher in META | 3789  | 2604  | 4600  | 10140 | 6259  | 16634 |
| ENSMUSG00000045664.4   | Cdc42ep2      | 4.33E-05    | 0.001592698 | 3 | 3 | 362         | 1760        | 1398        | 1.667212491  | 1.760041402 | Higher in META | 200   | 351   | 535   | 1356  | 2000  | 1151  |
| ENSMUSG00000031740.8   | Mmp2          | 4.45E-05    | 0.001609731 | 3 | 3 | 9951.333333 | 37381.66667 | 27430.33333 | 1.339431615  | 1.339431615 | Higher in META | 11511 | 7277  | 11066 | 36172 | 17734 | 58239 |
| ENSMUSG0000003149.7    | Praf2         | 4.53E-05    | 0.001628868 | 3 | 3 | 392.3333333 | 2045.666667 | 1653.333333 | 1.777059409  | 1.892029333 | Higher in META | 257   | 428   | 492   | 1418  | 1721  | 2968  |
| ENSMUSG00000049436.4   | Upk1b         | 4.59E-05    | 0.001643975 | 3 | 3 | 6           | 126         | 120         | 3.212479489  | 4.348543566 | Higher in META | 3     | 3     | 12    | 19    | 225   | 137   |
| ENSMUSG00000024424.14  | Ttc39c        | 5.12E-05    | 0.001805591 | 3 | 3 | 582         | 3637        | 3055        | 1.922367334  | 2.073895364 | Higher in META | 245   | 624   | 877   | 2592  | 2246  | 6073  |
| ENSMUSG00000039007.9   | Cpq           | 5.30E-05    | 0.001861917 | 3 | 3 | 914         | 3010.666667 | 2096.666667 | 1.288141819  | 1.330036728 | Higher in META | 907   | 588   | 1247  | 2728  | 2317  | 3987  |
| ENSMUSG00000005973.6   | Rcn1          | 5.45E-05    | 0.001905093 | 3 | 3 | 3232.333333 | 16030.33333 | 12798       | 1.774873592  | 1.892113729 | Higher in META | 4736  | 1665  | 3296  | 11263 | 13963 | 22865 |
| ENSMUSG00000025151.16  | Maged1        | 5.56E-05    | 0.001933004 | 3 | 3 | 7804        | 35085       | 27281       | 1.700523762  | 1.802705101 | Higher in META | 8948  | 5273  | 9191  | 22504 | 35995 | 46756 |
| ENSMUSG00000020695.14  | Mrc2          | 5.64E-05    | 0.00195115  | 3 | 3 | 2765.333333 | 15277       | 12511.66667 | 1.943730532  | 1.943730532 | Higher in META | 1442  | 2862  | 3992  | 9359  | 11742 | 24730 |
| ENSMUSG00000031760.9   | Mt3           | 5.66E-05    | 0.001954663 | 3 | 3 | 21.66666667 | 278         | 256.3333333 | 2.58647927   | 3.03400742  | Higher in META | 10    | 35    | 20    | 112   | 251   | 471   |
| ENSMUSG00000015053.14  | Gata2         | 5.73E-05    | 0.0019656   | 3 | 3 | 223         | 1156        | 933         | 1.789321876  | 1.910552176 | Higher in META | 263   | 111   | 295   | 563   | 935   | 1970  |
| ENSMUSG00000036030.9   | Prtg          | 6.75E-05    | 0.002264783 | 3 | 3 | 50.66666667 | 465.3333333 | 414.6666667 | 2.377648028  | 2.708509605 | Higher in META | 13    | 28    | 111   | 323   | 206   | 867   |
| ENSMUSG00000031289.10  | Il13ra2       | 7.38E-05    | 0.002427796 | 3 | 3 | 73          | 1507.666667 | 1434.666667 | 2.943253375  | 3.744408562 | Higher in META | 15    | 60    | 144   | 125   | 1006  | 3392  |
| ENSMUSG00000054091.9   | 1810037117Rik | 7.56E-05    | 0.002479322 | 3 | 3 | 2155.333333 | 6944.333333 | 4789        | 1.129121851  | 1.15815427  | Higher in META | 2222  | 1479  | 2765  | 4690  | 4510  | 11633 |
| ENSMUSG00000027500.10  | Stmn2         | 7.96E-05    | 0.002599908 | 3 | 3 | 306         | 6306        | 6000        | 3.210309095  | 4.499838656 | Higher in META | 22    | 23    | 873   | 3034  | 8850  | 6989  |
| ENSMUSG00000001281.9   | Itgb7         | 8.08E-05    | 0.00262621  | 3 | 3 | 276         | 2342.333333 | 2066.333333 | 2.283056936  | 2.57659201  | Higher in META | 178   | 62    | 588   | 1273  | 915   | 4839  |
| ENSMUSG00000035373.2   | Ccl7          | 8.15E-05    | 0.002637908 | 3 | 3 | 741.3333333 | 4237.666667 | 3496.333333 | 1.838818299  | 1.978096207 | Higher in META | 358   | 534   | 1332  | 2168  | 2559  | 7994  |
| ENSMUSG00000002732.14  | Fkbp7         | 8.26E-05    | 0.002662479 | 3 | 3 | 459         | 1966.666667 | 1507.666667 | 1.594004982  | 1.681361681 | Higher in META | 250   | 367   | 760   | 1719  | 1371  | 2802  |
| ENSMUSG00000005667.8   | Mthfd2        | 8.30E-05    | 0.002670237 | 3 | 3 | 797.3333333 | 3422.333333 | 2625        | 1.462631657  | 1.528945394 | Higher in META | 1089  | 507   | 796   | 2341  | 2120  | 5806  |
| ENSMUSG00000029659.16  | Medag         | 8.83E-05    | 0.002808002 | 3 | 3 | 550         | 4500        | 3950        | 2.371566174  | 2.714100265 | Higher in META | 169   | 442   | 1039  | 1785  | 4931  | 6784  |
| ENSMUSG00000026875.14  | Traf1         | 9.04E-05    | 0.002870896 | 3 | 3 | 614.3333333 | 2587.666667 | 1973.333333 | 1.560728946  | 1.643305917 | Higher in META | 379   | 333   | 1131  | 2207  | 1414  | 4142  |
| ENSMUSG000000429288.4  | Lix1          | 9.25E-05    | 0.002916412 | 3 | 3 | 2165        | 7886.333333 | 5721.333333 | 1.304616276  | 1.351442556 | Higher in META | 2535  | 1791  | 2169  | 7108  | 5355  | 11196 |
| ENSMUSG00000048489.12  | Depp1         | 9.43E-05    | 0.00296734  | 3 | 3 | 206.6666667 | 1157.333333 | 950.6666667 | 1.759892144  | 1.882832975 | Higher in META | 216   | 130   | 274   | 1240  | 316   | 1916  |
| ENSMUSG00000028864.7   | Hgf           | 9.60E-05    | 0.002994178 | 3 | 3 | 227.3333333 | 2107.333333 | 1880        | 2.262307556  | 2.5545342   | Higher in META | 198   | 123   | 361   | 402   | 1181  | 4739  |
| ENSMUSG00000073295.4   | Nudt11        | 9.97E-05    | 0.003070943 | 3 | 3 | 6           | 130         | 124         | 3.209140744  | 4.615119698 | Higher in META | 2     | 2     | 14    | 182   | 193   | 15    |
| ENSMUSG00000031962.6   | Cdh15         | 0.000100825 | 0.003092172 | 3 | 3 | 76.66666667 | 1231.666667 | 1155        | 3.113245924  | 4.267697186 | Higher in META | 37    | 45    | 148   | 474   | 3053  | 168   |
| ENSMUSG00000022887.8   | Masp1         | 0.000107218 | 0.003240911 | 3 | 3 | 72          | 522.3333333 | 450.3333333 | 1.991801841  | 2.182276305 | Higher in META | 74    | 69    | 73    | 608   | 132   | 827   |
| ENSMUSG000000039411.10 | Rab3b         | 0.000107918 | 0.003248052 | 3 | 3 | 12          | 230         | 218         | 2.911193473  | 3.739783489 | Higher in META | 3     | 2     | 31    | 64    | 100   | 526   |
| ENSMUSG00000032387.15  | Rbpms2        | 0.000113768 | 0.003414345 | 3 | 3 | 324.6666667 | 2316.333333 | 1991.666667 | 2.670994712  | 2.670994712 | Higher in META | 401   | 178   | 395   | 3933  | 2000  | 1016  |
| ENSMUSG00000022620.14  | Arsa          | 0.000115084 | 0.003428225 | 3 | 3 | 1308.666667 | 5284.666667 | 3976        | 1.388780429  | 1.44756793  | Higher in META | 1444  | 1249  | 1233  | 4101  | 3681  | 8072  |
| ENSMUSG00000055435     |               |             |             |   |   |             |             |             |              |             |                |       |       |       |       |       |       |

|                       |          |             |             |   |   |             |              |             |             |             |                   |       |       |       |       |       |       |
|-----------------------|----------|-------------|-------------|---|---|-------------|--------------|-------------|-------------|-------------|-------------------|-------|-------|-------|-------|-------|-------|
| ENSMUSG00000028789.16 | Azin2    | 0.000200287 | 0.005434126 | 3 | 3 | 546         | 2527         | 1981        | 1.531715473 | 1.61893358  | Higher in META    | 313   | 498   | 827   | 2295  | 1062  | 4224  |
| ENSMUSG00000031960.14 | Aars     | 0.000204199 | 0.005502591 | 3 | 3 | 4488.666667 | 14277.333333 | 9788.666667 | 1.099055886 | 1.12959268  | Higher in META    | 5218  | 3299  | 4949  | 10955 | 9182  | 22695 |
| ENSMUSG00000029767.16 | Calu     | 0.000204781 | 0.005502591 | 3 | 3 | 19177.66667 | 66333.66667  | 47156       | 1.211485206 | 1.252912647 | Higher in META    | 17930 | 18300 | 21303 | 64849 | 40025 | 94127 |
| ENSMUSG00000076433.4  | Cep295nl | 0.000207804 | 0.005563241 | 3 | 3 | 12.33333333 | 95.66666667  | 83.33333333 | 2.08039728  | 2.330126398 | Higher in META    | 11    | 12    | 14    | 49    | 62    | 176   |
| ENSMUSG00000052584.9  | Serp2    | 0.000215432 | 0.005714833 | 3 | 3 | 35.33333333 | 280          | 244.6666667 | 2.146925447 | 2.425428704 | Higher in META    | 10    | 35    | 61    | 166   | 172   | 502   |
| ENSMUSG00000038463.8  | Olfml2b  | 0.000218407 | 0.005772697 | 3 | 3 | 1314.333333 | 8101.333333  | 6787        | 2.185181721 | 2.481769169 | Higher in META    | 725   | 1264  | 1954  | 6517  | 11965 | 5822  |
| ENSMUSG00000039601.15 | Rcan2    | 0.000225477 | 0.005868083 | 3 | 3 | 68.66666667 | 455          | 386.3333333 | 2.202589056 | 2.509690856 | Higher in META    | 31    | 61    | 114   | 258   | 607   | 500   |
| ENSMUSG00000039420.8  | Fcgrt    | 0.000232629 | 0.006064756 | 3 | 3 | 2409        | 8397.666667  | 5988.666667 | 1.274610323 | 1.324185296 | Higher in META    | 1751  | 1676  | 3800  | 8695  | 4052  | 12446 |
| ENSMUSG00000001870.15 | Ltbp1    | 0.000234611 | 0.006079386 | 3 | 3 | 410.6666667 | 14140        | 10029.33333 | 1.362348642 | 1.423630099 | Higher in META    | 3313  | 1955  | 7064  | 12743 | 9501  | 20176 |
| ENSMUSG00000025169.6  | Ogfod3   | 0.000235564 | 0.006082404 | 3 | 3 | 247.3333333 | 783.6666667  | 536.3333333 | 1.137930663 | 1.172665454 | Higher in META    | 203   | 162   | 377   | 602   | 473   | 1276  |
| ENSMUSG00000034220.7  | Gpc1     | 0.000253427 | 0.006486043 | 3 | 3 | 462.3333333 | 24489        | 19876.66667 | 1.686467609 | 1.810559897 | Higher in META    | 2278  | 5606  | 5953  | 19280 | 15253 | 38934 |
| ENSMUSG00000074793.10 | Hspa12b  | 0.000257704 | 0.006583901 | 3 | 3 | 298.3333333 | 1168         | 869.6666667 | 1.574680279 | 1.673956426 | Higher in META    | 227   | 201   | 467   | 1451  | 870   | 1183  |
| ENSMUSG00000014813.8  | Stc1     | 0.000266169 | 0.006764507 | 3 | 3 | 505.3333333 | 2912         | 2406.666667 | 2.01327178  | 2.242387237 | Higher in META    | 253   | 447   | 816   | 1440  | 3586  | 3710  |
| ENSMUSG00000031990.15 | Jam3     | 0.000269894 | 0.006847209 | 3 | 3 | 133.6666667 | 929.333333   | 795.6666667 | 2.283088086 | 2.646889563 | Higher in META    | 60    | 135   | 206   | 1173  | 1126  | 489   |
| ENSMUSG00000050447.15 | Lypd6    | 0.000271404 | 0.006873515 | 3 | 3 | 11          | 280.6666667  | 269.6666667 | 3.061277717 | 4.539632494 | Higher in META    | 2     | 9     | 22    | 736   | 84    | 22    |
| ENSMUSG00000028811.11 | Yars     | 0.000281174 | 0.007059451 | 3 | 3 | 1664        | 5855.666667  | 4191.666667 | 1.274582378 | 1.325575428 | Higher in META    | 1086  | 1440  | 2466  | 4564  | 3968  | 9035  |
| ENSMUSG00000056665.2  | Them6    | 0.000293356 | 0.007339957 | 3 | 3 | 373         | 1463         | 1090        | 1.477471863 | 1.559788194 | Higher in META    | 442   | 144   | 533   | 1373  | 879   | 2137  |
| ENSMUSG00000054408.9  | Spcc3    | 0.000300407 | 0.007477777 | 3 | 3 | 5055.333333 | 17717.66667  | 12662.33333 | 1.26035593  | 1.310072865 | Higher in META    | 4363  | 4795  | 6008  | 13104 | 13913 | 26136 |
| ENSMUSG00000006958.13 | Chr4     | 0.000316885 | 0.00774126  | 3 | 3 | 70          | 480          | 410         | 1.888372473 | 2.077596773 | Higher in META    | 31    | 69    | 110   | 249   | 211   | 980   |
| ENSMUSG00000027669.4  | Gnb4     | 0.00031865  | 0.007772163 | 3 | 3 | 1153.333333 | 6049.333333  | 4896        | 1.684841107 | 1.813346941 | Higher in META    | 682   | 1528  | 1250  | 5654  | 4046  | 8448  |
| ENSMUSG00000030870.16 | Fkbp14   | 0.000321918 | 0.007838733 | 3 | 3 | 833         | 2425         | 1592        | 1.075939489 | 1.106520649 | Higher in META    | 713   | 604   | 1182  | 2393  | 1567  | 3315  |
| ENSMUSG00000030786.18 | Itgam    | 0.000326132 | 0.007927612 | 3 | 3 | 985         | 3074.333333  | 2089.333333 | 1.133216956 | 1.169247252 | Higher in META    | 727   | 742   | 1486  | 2347  | 2076  | 4800  |
| ENSMUSG00000054409.4  | Tmem74   | 0.000327352 | 0.007931197 | 3 | 3 | 5           | 150.3333333  | 145.3333333 | 2.904800828 | 4.05795856  | Higher in META    | 0     | 7     | 8     | 121   | 16    | 314   |
| ENSMUSG00000047344.9  | Lanc13   | 0.000330313 | 0.007976347 | 3 | 3 | 5.666666667 | 79.66666667  | 74          | 2.780922219 | 3.674586285 | Higher in META    | 2     | 1     | 14    | 29    | 96    | 114   |
| ENSMUSG00000027447.6  | Cst3     | 0.000331914 | 0.00798931  | 3 | 3 | 13066.66667 | 42281        | 29214.33333 | 1.248999073 | 1.205164963 | Higher in META    | 10803 | 11515 | 16882 | 35368 | 33563 | 57912 |
| ENSMUSG00000045555.3  | Mettl24  | 0.000332105 | 0.00798931  | 3 | 3 | 28          | 182.3333333  | 154.3333333 | 2.177179497 | 2.49517531  | Higher in META    | 12    | 21    | 51    | 124   | 220   | 203   |
| ENSMUSG00000031780.2  | Ccl17    | 0.000332499 | 0.00798931  | 3 | 3 | 47.66666667 | 637.3333333  | 589.6666667 | 2.686759443 | 3.438690217 | Higher in META    | 34    | 57    | 52    | 1511  | 290   | 111   |
| ENSMUSG00000046756.10 | Mrrp57   | 0.000338295 | 0.008075188 | 3 | 3 | 1551.666667 | 4739.333333  | 3187.666667 | 1.120422681 | 1.155390997 | Higher in META    | 1219  | 1099  | 2337  | 3464  | 3376  | 7378  |
| ENSMUSG00000028161.7  | Ppp3ca   | 0.000342792 | 0.008169121 | 3 | 3 | 6385.333333 | 25111.66667  | 18726.33333 | 1.354170601 | 1.417951581 | Higher in META    | 4983  | 3915  | 10258 | 13187 | 14356 | 47792 |
| ENSMUSG00000019831.14 | Wasf1    | 0.000363763 | 0.008601133 | 3 | 3 | 299.6666667 | 1110.666667  | 811         | 1.387399259 | 1.457060986 | Higher in META    | 200   | 279   | 420   | 1053  | 280   | 828   |
| ENSMUSG00000032036.16 | Kirrel3  | 0.000383118 | 0.008894412 | 3 | 3 | 139         | 909          | 770         | 1.965651868 | 2.190795922 | Higher in META    | 182   | 143   | 92    | 1385  | 441   | 901   |
| ENSMUSG00000042812.5  | Foxf1    | 0.000384535 | 0.008943972 | 3 | 3 | 44.66666667 | 468.6666667  | 424         | 2.415401471 | 2.90538745  | Higher in META    | 39    | 38    | 57    | 55    | 510   | 841   |
| ENSMUSG00000047842.7  | Diras2   | 0.000390517 | 0.009054133 | 3 | 3 | 17          | 146.3333333  | 129.3333333 | 2.330156155 | 2.754135393 | Higher in META    | 4     | 7     | 40    | 131   | 78    | 230   |
| ENSMUSG00000022048.8  | Dpysl2   | 0.000392946 | 0.009081486 | 3 | 3 | 1063.333333 | 4432         | 3368.666667 | 1.401182214 | 1.473973297 | Higher in META    | 1117  | 1109  | 964   | 3104  | 3259  | 6933  |
| ENSMUSG0000001864.13  | Aif1l    | 0.000405929 | 0.00931971  | 3 | 3 | 527.3333333 | 5228         | 4700.666667 | 2.242204962 | 2.610623262 | Higher in META    | 904   | 94    | 584   | 3616  | 1209  | 10859 |
| ENSMUSG00000053647.4  | Gper1    | 0.000406145 | 0.00931971  | 3 | 3 | 63          | 424          | 361         | 2.256478849 | 2.634505029 | Higher in META    | 59    | 27    | 103   | 148   | 645   | 479   |
| ENSMUSG00000039943.16 | Ptcb4    | 0.000406651 | 0.00931971  | 3 | 3 | 449.3333333 | 1862         | 1412.666667 | 1.643012992 | 1.643012992 | Higher in META    | 253   | 440   | 655   | 1642  | 1554  | 2390  |
| ENSMUSG00000032192.9  | Gnb5     | 0.000406962 | 0.00931971  | 3 | 3 | 440         | 1409         | 969         | 1.15252336  | 1.191876305 | Higher in META    | 326   | 379   | 615   | 1284  | 891   | 2052  |
| ENSMUSG00000040963.15 | Asgr2    | 0.0004071   | 0.00931971  | 3 | 3 | 55.66666667 | 1352.666667  | 1297        | 2.934328271 | 4.230296945 | Higher in META    | 18    | 81    | 68    | 3738  | 185   | 135   |
| ENSMUSG00000049036.7  | Tmem121  | 0.000420161 | 0.009543559 | 3 | 3 | 153.6666667 | 813          | 659.3333333 | 1.776492663 | 1.937918256 | Higher in META    | 209   | 134   | 118   | 488   | 825   | 1126  |
| ENSMUSG00000032456.13 | Nmnat3   | 0.000421685 | 0.009598887 | 3 | 3 | 151.3333333 | 574.6666667  | 423.3333333 | 1.417131509 | 1.493629657 | Higher in META    | 108   | 142   | 204   | 485   | 472   | 767   |
| ENSMUSG00000053063.11 | Clec12a  | 0.000444447 | 0.009595929 | 3 | 3 | 300         | 1850         | 1550        | 2.039008705 | 2.300582819 | Higher in META    | 135   | 275   | 490   | 750   | 2216  | 2584  |
| ENSMUSG00000078949.2  | R3hdml   | 0.000439934 | 0.009823843 | 3 | 3 | 8.666666667 | 86           | 77.33333333 | 2.458171074 | 3.000382646 | Higher in META    | 3     | 2     | 21    | 62    | 28    | 138   |
| ENSMUSG00000035498.10 | Cdcp1    | 6.21E-40    | 9.02E-26    | 3 | 3 | 4855.666667 | 125.3333333  | 4730.333333 | 5.31878957  | 5.608241507 | Higher in NONMETA | 4825  | 3158  | 6584  | 157   | 91    | 128   |
| ENSMUSG00000019734.16 | Tme4     | 2.21E-29    | 1.60E-35    | 3 | 3 | 3667        | 132          | 3535        | 5.061118771 | 5.4151667   | Higher in NONMETA | 3288  | 3967  | 3746  | 161   | 49    | 186   |
| ENSMUSG00000054889.9  | Dsp      | 3.93E-28    | 1.90E-24    | 3 | 3 | 7635        | 187          | 7448        | 5.364261131 | 5.819011341 | Higher in NONMETA | 3048  | 5535  | 14322 | 188   | 83    | 290   |
| ENSMUSG00000025383.2  | Il23a    | 3.32E-27    | 1.08E-23    | 3 | 3 | 1259.333333 | 42.66666667  | 1216.666667 | 5.22743077  | 5.662561791 | Higher in NONMETA | 1629  | 1156  | 993   | 21    | 19    | 88    |
| ENSMUSG00000029149.14 | Krtcap3  | 3.70E-27    | 1.08E-23    | 3 | 3 | 1511.333333 | 125.6666667  | 1385.666667 | 3.871261764 | 4.034516038 | Higher in NONMETA | 1888  | 950   | 1696  | 113   | 92    | 172   |
| ENSMUSG00000096215.8  | Smim22   | 2.15E-25    | 5.22E-22    | 3 | 3 | 404.6666667 | 21.66666667  | 383         | 4.350104639 | 4.612716571 | Higher in NONMETA | 433   | 256   | 525   | 23    | 17    | 25    |
| ENSMUSG00000061859.16 | Patj     | 3.61E-21    | 3.61E-21    | 3 | 3 | 2161.333333 | 212.6666667  | 1948.666667 | 3.848903936 | 4.028981747 | Higher in NONMETA | 1851  | 2176  | 2457  | 175   | 87    | 376   |
| ENSMUSG00000024774.15 | Ankrd22  | 7.22E-23    | 1.31E-19    | 3 | 3 | 679.3333333 | 21           | 658.3333333 | 5.205255863 | 5.747017042 | Higher in NONMETA | 797   | 551   | 690   | 5     | 12    | 46    |
| ENSMUSG00000037600.16 | Kdf1     | 1.68E-22    | 2.71E-19    | 3 | 3 | 1071        | 36           | 1035        | 4.885697096 | 5.329531704 | Higher in NONMETA | 997   | 776   | 1440  | 58    | 12    | 38    |
| ENSMUSG00000025504.13 | Eps8l2   | 7.81E-22    | 1.14E-18    | 3 | 3 | 1082.666667 | 91           | 991.6666667 | 3.949265079 | 4.173527277 | Higher in NONMETA | 903   | 747   | 1598  | 87    | 27    | 159   |
| ENSMUSG00000054065.12 | Pkp3     | 1.15E-21    | 1.52E-18    | 3 | 3 | 3769.666667 | 392          | 3377.666667 | 3.518214754 | 3.674517223 | Higher in NONMETA | 2758  | 2916  | 5635  | 449   | 240   | 487   |
| ENSMUSG00000040525.13 | Cblc     | 2.06E-20    | 2.49E-17    | 3 | 3 | 934.3333333 | 40.66666667  | 893.6666667 | 4.621577706 | 5.036343533 | Higher in NONMETA | 760   | 710   | 1333  | 58    | 10    | 54    |
| ENSMUSG00000019312.10 | Grb7     | 6.44E-20    | 7.21E-17    | 3 | 3 | 1746.666667 | 41.66666667  | 1705        | 5.090743313 | 5.696621505 | Higher in NONMETA | 1133  | 1465  | 2642  | 74    | 22    | 29    |
| ENSMUSG00000057454.5  | Lypd3    | 1.36E-19    | 1.42E-16    | 3 | 3 | 2370        | 20.66666667  | 2349.333333 | 5.904803942 | 7.020297221 | Higher in NONMETA | 420   | 1215  | 5475  | 22    | 17    | 23    |
| ENSMUSG00000031995.9  | St14     | 2.54E-19    | 2.46E-16    | 3 | 3 | 8492.333333 | 414.6666667  | 8077.666667 | 4.383222927 | 4.753465254 | Higher in NONMETA | 7763  | 7166  | 10548 | 668   | 200   | 376   |
| ENSMUSG00000018166.8  | Erbb3    | 3.38E-19    | 3.07E-16    | 3 | 3 | 4238.333333 | 230.3333333  | 4008        | 4.402658337 | 4.781805264 | Higher in NONMETA | 3357  | 4896  | 4462  | 319   | 87    | 285   |
| ENSMUSG00000040728.15 | Esrp1    | 3.89E-19    | 3.33E-16    | 3 | 3 | 4114.333333 | 108          | 4006.333333 | 4.983649181 | 5.5732902   | Higher in NONMETA | 2615  | 3375  |       |       |       |       |

|                        |          |          |          |   |   |              |              |              |             |             |                   |       |       |       |      |     |      |
|------------------------|----------|----------|----------|---|---|--------------|--------------|--------------|-------------|-------------|-------------------|-------|-------|-------|------|-----|------|
| ENSMUSG00000037279.13  | Ovol2    | 8.57E-16 | 3.56E-13 | 3 | 3 | 132.6666667  | 9.333333333  | 123.3333333  | 4.038747943 | 4.409092479 | Higher in NONMETA | 125   | 90    | 183   | 8    | 3   | 17   |
| ENSMUSG00000028572.13  | Hook1    | 1.51E-15 | 6.11E-13 | 3 | 3 | 1259         | 144.6666667  | 1114.3333333 | 3.405060303 | 3.615519524 | Higher in NONMETA | 1005  | 680   | 2092  | 156  | 50  | 228  |
| ENSMUSG00000003309.14  | Ap1m2    | 3.44E-15 | 1.35E-12 | 3 | 3 | 2689.3333333 | 81.33333333  | 2608         | 4.692540291 | 5.355038858 | Higher in NONMETA | 4045  | 1093  | 2930  | 148  | 37  | 59   |
| ENSMUSG00000017607.9   | Tns4     | 4.01E-15 | 1.53E-12 | 3 | 3 | 7485.3333333 | 364.6666667  | 7120.666667  | 4.328327231 | 4.822430358 | Higher in NONMETA | 3395  | 8354  | 10707 | 558  | 156 | 380  |
| ENSMUSG00000045314.5   | Sowahb   | 4.81E-15 | 1.79E-12 | 3 | 3 | 404.6666667  | 13           | 391.6666667  | 4.73870637  | 5.454193469 | Higher in NONMETA | 196   | 577   | 441   | 18   | 9   | 12   |
| ENSMUSG00000033590.8   | Myo5c    | 5.51E-15 | 2.00E-12 | 3 | 3 | 331.6666667  | 41.33333333  | 290.3333333  | 3.366247392 | 3.578242165 | Higher in NONMETA | 309   | 195   | 491   | 38   | 13  | 73   |
| ENSMUSG00000022900.14  | Ildr1    | 5.66E-15 | 2.01E-12 | 3 | 3 | 888.6666667  | 57           | 831.6666667  | 3.977204844 | 4.351442698 | Higher in NONMETA | 1125  | 550   | 991   | 91   | 27  | 53   |
| ENSMUSG00000037995.15  | Igsf9    | 5.87E-15 | 2.03E-12 | 3 | 3 | 2076         | 153.6666667  | 1922.333333  | 4.848667883 | 4.182632206 | Higher in NONMETA | 1641  | 2518  | 2069  | 177  | 134 | 150  |
| ENSMUSG00000041782.14  | Lad1     | 7.20E-15 | 2.43E-12 | 3 | 3 | 9217.3333333 | 222          | 8995.333333  | 4.96193005  | 5.811088621 | Higher in NONMETA | 3615  | 15765 | 8272  | 245  | 238 | 183  |
| ENSMUSG00000021118.7   | Plek2    | 1.08E-14 | 3.58E-12 | 3 | 3 | 915          | 152.6666667  | 762.3333333  | 3.09587347  | 3.261416167 | Higher in NONMETA | 667   | 797   | 1281  | 88   | 68  | 302  |
| ENSMUSG00000001672.14  | Marveld3 | 1.21E-14 | 3.90E-12 | 3 | 3 | 896          | 28.33333333  | 867.6666667  | 4.683611149 | 5.382130333 | Higher in NONMETA | 999   | 359   | 1330  | 49   | 5   | 31   |
| ENSMUSG00000026638.15  | Irf6     | 1.35E-14 | 4.27E-12 | 3 | 3 | 2864         | 111.3333333  | 2752.666667  | 4.370644996 | 4.910373458 | Higher in NONMETA | 1968  | 1285  | 5339  | 194  | 50  | 90   |
| ENSMUSG00000042306.11  | S100a14  | 2.13E-14 | 6.57E-12 | 3 | 3 | 7418         | 115.6666667  | 7302.333333  | 5.237916516 | 6.36776392  | Higher in NONMETA | 957   | 10156 | 11141 | 130  | 108 | 109  |
| ENSMUSG00000014791.10  | Elmo3    | 2.40E-14 | 7.28E-12 | 3 | 3 | 789.6666667  | 166          | 623.6666667  | 2.666588613 | 2.772580964 | Higher in NONMETA | 644   | 586   | 1139  | 100  | 113 | 285  |
| ENSMUSG00000084128.10  | Esrp2    | 2.79E-14 | 8.09E-12 | 3 | 3 | 1776.3333333 | 91.66666667  | 1684.666667  | 4.268254428 | 4.77840958  | Higher in NONMETA | 1858  | 472   | 2999  | 97   | 22  | 156  |
| ENSMUSG00000029370.10  | Rassf6   | 2.80E-14 | 8.09E-12 | 3 | 3 | 384.3333333  | 62.33333333  | 322          | 2.952428457 | 3.100736691 | Higher in NONMETA | 449   | 297   | 407   | 64   | 42  | 81   |
| ENSMUSG00000036687.13  | Tmem184a | 3.28E-14 | 9.18E-12 | 3 | 3 | 529.6666667  | 22.66666667  | 507          | 4.292081701 | 4.824215862 | Higher in NONMETA | 638   | 196   | 755   | 37   | 12  | 19   |
| ENSMUSG00000023232.17  | Serinc2  | 4.09E-14 | 1.12E-11 | 3 | 3 | 5813.3333333 | 601.33333333 | 5212         | 3.401211063 | 3.638547432 | Higher in NONMETA | 4646  | 5328  | 7466  | 826  | 417 | 561  |
| ENSMUSG00000035852.11  | Misp     | 6.78E-14 | 2.07E-11 | 3 | 3 | 619.6666667  | 53.66666667  | 566          | 3.731516721 | 4.066828826 | Higher in NONMETA | 698   | 698   | 463   | 37   | 50  | 74   |
| ENSMUSG00000074272.12  | Spint2   | 1.17E-13 | 3.09E-11 | 3 | 3 | 13717.33333  | 760          | 12957.33333  | 4.028542736 | 4.470636762 | Higher in NONMETA | 14511 | 9289  | 17352 | 1363 | 408 | 509  |
| ENSMUSG00000029154.13  | Cwh43    | 1.36E-13 | 3.49E-11 | 3 | 3 | 1143.666667  | 27.33333333  | 1116.333333  | 4.923098848 | 5.885090555 | Higher in NONMETA | 1442  | 230   | 1759  | 36   | 3   | 43   |
| ENSMUSG00000006179.8   | Prss16   | 2.89E-13 | 7.15E-11 | 3 | 3 | 354.6666667  | 43.66666667  | 311          | 3.253414547 | 3.477288514 | Higher in NONMETA | 367   | 315   | 382   | 56   | 27  | 48   |
| ENSMUSG00000021751.13  | Acox2    | 4.12E-13 | 9.99E-11 | 3 | 3 | 268          | 9.666666667  | 258.3333333  | 4.65079575  | 5.467974478 | Higher in NONMETA | 486   | 92    | 226   | 8    | 2   | 19   |
| ENSMUSG00000010080.15  | Epn3     | 4.83E-13 | 1.15E-10 | 3 | 3 | 1096.3333333 | 45           | 1051.333333  | 4.213569424 | 4.774593781 | Higher in NONMETA | 1285  | 468   | 1536  | 74   | 36  | 25   |
| ENSMUSG00000023039.16  | Krt7     | 6.31E-13 | 1.43E-10 | 3 | 3 | 31425.33333  | 621          | 30804.33333  | 4.88340631  | 5.895004984 | Higher in NONMETA | 24981 | 43597 | 25698 | 823  | 843 | 197  |
| ENSMUSG00000021636.14  | Marveld2 | 6.46E-13 | 1.44E-10 | 3 | 3 | 852          | 80           | 772          | 3.595235031 | 3.917593062 | Higher in NONMETA | 756   | 779   | 1021  | 122  | 27  | 91   |
| ENSMUSG00000026994.9   | Galnt3   | 7.06E-13 | 1.55E-10 | 3 | 3 | 3433.3333333 | 492.3333333  | 2941         | 2.93712901  | 3.102175267 | Higher in NONMETA | 3843  | 1700  | 4757  | 525  | 402 | 550  |
| ENSMUSG00000030431.8   | Tmem238  | 8.75E-13 | 1.90E-10 | 3 | 3 | 1099.3333333 | 327          | 772.3333333  | 2.169986664 | 2.233648513 | Higher in NONMETA | 1219  | 645   | 1434  | 268  | 204 | 509  |
| ENSMUSG00000031710.4   | Ucp1     | 1.33E-12 | 2.81E-10 | 3 | 3 | 3563         | 10.66666667  | 3552.333333  | 5.811483301 | 8.90374133  | Higher in NONMETA | 3639  | 26    | 7024  | 6    | 3   | 23   |
| ENSMUSG00000046826.7   | Fam187b  | 1.48E-12 | 3.08E-10 | 3 | 3 | 153.3333333  | 23           | 130.3333333  | 3.060122992 | 3.256624042 | Higher in NONMETA | 126   | 127   | 207   | 23   | 12  | 34   |
| ENSMUSG00000034119.12  | Atp2c2   | 1.67E-12 | 3.41E-10 | 3 | 3 | 673.3333333  | 34.33333333  | 639          | 4.246246488 | 4.859016462 | Higher in NONMETA | 173   | 574   | 1273  | 32   | 11  | 60   |
| ENSMUSG00000003860.12  | Rab25    | 4.47E-12 | 8.91E-10 | 3 | 3 | 1912.666667  | 70.33333333  | 1842.333333  | 4.319523494 | 5.011034737 | Higher in NONMETA | 1204  | 1434  | 3100  | 144  | 31  | 36   |
| ENSMUSG00000038007.14  | Acer2    | 4.48E-12 | 8.91E-10 | 3 | 3 | 747          | 121          | 626          | 3.006350413 | 3.199250694 | Higher in NONMETA | 673   | 402   | 1166  | 113  | 36  | 214  |
| ENSMUSG00000001247.16  | Lsr      | 1.12E-11 | 2.15E-09 | 3 | 3 | 1777         | 103.6666667  | 1673.333333  | 4.016883324 | 4.569070164 | Higher in NONMETA | 1462  | 1833  | 2036  | 194  | 29  | 88   |
| ENSMUSG00000032358.12  | Fam83b   | 1.12E-11 | 2.15E-09 | 3 | 3 | 348.6666667  | 8            | 340.6666667  | 4.857690163 | 6.070748232 | Higher in NONMETA | 171   | 110   | 765   | 5    | 0   | 19   |
| ENSMUSG00000004464.71  | Pard6b   | 1.63E-11 | 3.09E-09 | 3 | 3 | 1150.666667  | 63.33333333  | 1087.333333  | 4.108103367 | 4.724235894 | Higher in NONMETA | 361   | 1784  | 1307  | 75   | 43  | 72   |
| ENSMUSG00000029032.12  | Arhgef16 | 2.36E-11 | 4.41E-09 | 3 | 3 | 1283         | 40.66666667  | 1242.333333  | 4.330818893 | 5.108181307 | Higher in NONMETA | 587   | 849   | 2413  | 77   | 28  | 17   |
| ENSMUSG00000015647.9   | Lama5    | 2.85E-11 | 5.20E-09 | 3 | 3 | 7233         | 1896         | 5337         | 2.488581601 | 2.60298067  | Higher in NONMETA | 6671  | 4737  | 10291 | 1064 | 776 | 3848 |
| ENSMUSG00000031075.18  | Ano1     | 2.86E-11 | 5.20E-09 | 3 | 3 | 11377.66667  | 1675.333333  | 9702.333333  | 3.206149794 | 3.468395103 | Higher in NONMETA | 7137  | 13657 | 13339 | 1718 | 534 | 2174 |
| ENSMUSG00000003051.13  | Elf3     | 3.26E-11 | 5.85E-09 | 3 | 3 | 1996         | 81           | 1915         | 4.174191661 | 4.856498789 | Higher in NONMETA | 3145  | 385   | 2458  | 127  | 52  | 66   |
| ENSMUSG000000042724.8  | Map3k9   | 3.56E-11 | 9.39E-09 | 3 | 3 | 425.3333333  | 53.66666667  | 371.6666667  | 3.160543923 | 3.420924988 | Higher in NONMETA | 319   | 463   | 494   | 67   | 39  | 55   |
| ENSMUSG00000005251.14  | Ripk4    | 6.46E-11 | 1.11E-08 | 3 | 3 | 1457         | 69           | 1388         | 3.927315488 | 4.493288387 | Higher in NONMETA | 1270  | 907   | 2194  | 100  | 78  | 29   |
| ENSMUSG000000044279.15 | Cr3      | 7.38E-11 | 1.25E-08 | 3 | 3 | 802.3333333  | 27.66666667  | 774.6666667  | 4.294887054 | 5.107452287 | Higher in NONMETA | 269   | 506   | 1632  | 53   | 9   | 21   |
| ENSMUSG00000027562.12  | Car2     | 9.59E-11 | 1.60E-08 | 3 | 3 | 5697         | 572.3333333  | 5124.666667  | 3.392138367 | 3.732058641 | Higher in NONMETA | 3798  | 1497  | 11796 | 404  | 279 | 1034 |
| ENSMUSG00000029381.15  | Shroom3  | 1.44E-10 | 2.39E-08 | 3 | 3 | 1956.666667  | 339.6666667  | 1617         | 2.711024628 | 2.875044382 | Higher in NONMETA | 2057  | 1098  | 2715  | 457  | 199 | 363  |
| ENSMUSG00000051431.7   | Gpr87    | 1.77E-10 | 2.89E-08 | 3 | 3 | 873.6666667  | 10.66666667  | 863          | 5.113265276 | 7.262859751 | Higher in NONMETA | 30    | 1510  | 1081  | 8    | 2   | 22   |
| ENSMUSG00000024421.16  | Lama3    | 1.79E-10 | 2.89E-08 | 3 | 3 | 14833.33333  | 192.3333333  | 14641        | 5.008722084 | 6.856651838 | Higher in NONMETA | 1426  | 35668 | 7406  | 128  | 246 | 203  |
| ENSMUSG000000045394.8  | Epcam    | 3.10E-10 | 4.91E-08 | 3 | 3 | 41294        | 1247.666667  | 40046.33333  | 4.259109342 | 5.123735524 | Higher in NONMETA | 18896 | 16962 | 88024 | 2593 | 618 | 532  |
| ENSMUSG000000043430.5  | Psap1    | 3.21E-10 | 5.01E-08 | 3 | 3 | 362.3333333  | 5            | 357.3333333  | 4.846508326 | 6.522429612 | Higher in NONMETA | 63    | 137   | 887   | 8    | 0   | 7    |
| ENSMUSG00000037681.13  | Esy13    | 4.40E-10 | 6.66E-08 | 3 | 3 | 639.3333333  | 41.33333333  | 598          | 3.642666718 | 4.127656735 | Higher in NONMETA | 304   | 273   | 1341  | 61   | 26  | 37   |
| ENSMUSG00000053646.13  | Ptxnb1   | 5.27E-10 | 7.82E-08 | 3 | 3 | 3082.666667  | 623          | 2459.666667  | 2.529002401 | 2.669443933 | Higher in NONMETA | 2088  | 1680  | 5480  | 698  | 346 | 825  |
| ENSMUSG00000033998.9   | Kcnk1    | 6.00E-10 | 8.81E-08 | 3 | 3 | 1639         | 65.66666667  | 1573.333333  | 4.138622333 | 4.949492824 | Higher in NONMETA | 3062  | 734   | 1121  | 129  | 34  | 34   |
| ENSMUSG00000018569.12  | Cldn7    | 6.13E-10 | 8.90E-08 | 3 | 3 | 4069.666667  | 185          | 3884.666667  | 4.052347116 | 4.795265297 | Higher in NONMETA | 4014  | 3868  | 4327  | 407  | 73  | 75   |
| ENSMUSG00000020411.2   | Nipal4   | 6.18E-10 | 8.90E-08 | 3 | 3 | 362.3333333  | 25.66666667  | 336.6666667  | 3.733546245 | 4.276475456 | Higher in NONMETA | 238   | 237   | 612   | 41   | 4   | 32   |
| ENSMUSG00000061517.8   | Sox21    | 1.19E-09 | 1.70E-07 | 3 | 3 | 234          | 10           | 224          | 3.933201721 | 4.655303564 | Higher in NONMETA | 245   | 155   | 302   | 10   | 16  | 4    |
| ENSMUSG00000052566.8   | Hook2    | 1.37E-09 | 1.93E-07 | 3 | 3 | 2274         | 711          | 1563         | 2.249927175 | 2.351716504 | Higher in NONMETA | 2540  | 1555  | 2727  | 383  | 338 | 1412 |
| ENSMUSG00000018554.13  | Ybx2     | 1.41E-09 | 1.97E-07 | 3 | 3 | 80           | 3.333333333  | 76.66666667  | 4.163183597 | 5.092492813 | Higher in NONMETA | 68    | 27    | 145   | 2    | 1   | 7    |
| ENSMUSG000000040434.16 | Large2   | 1.68E-09 | 2.32E-07 | 3 | 3 | 2403.666667  | 33.33333333  | 2370.333333  | 4.720847431 | 6.423810458 | Higher in NONMETA | 4742  | 67    | 2402  | 54   | 19  | 27   |
| ENSMUSG00000038295.14  | Atg9b    | 2.34E-09 | 3.17E-07 | 3 | 3 | 4738         | 256.6666667  | 4481.333333  | 4.18833675  | 5.142324679 | Higher in NONMETA | 742   | 9188  | 4284  | 171  | 91  | 508  |
| ENSMUSG00000064023.4   | Klk8     | 2.49E-09 | 3.35E-07 | 3 | 3 | 8869.3333333 | 176.6666667  | 8692.666667  | 4.714383581 | 6.485010582 | Higher in NONMETA | 387   | 20192 | 6029  | 100  | 128 | 302  |
| ENSMUSG000000041842.15 | Fhdc1    | 2.62E-09 | 3.46E-07 | 3 | 3 | 1768.3333333 | 419          | 1349.333333  | 2.413940894 | 2.546652877 | Higher in NONMETA | 2049  | 755   | 2501  | 430  |     |      |

|                       |               |          |          |   |   |             |             |             |             |              |                   |                   |       |       |       |      |      |      |
|-----------------------|---------------|----------|----------|---|---|-------------|-------------|-------------|-------------|--------------|-------------------|-------------------|-------|-------|-------|------|------|------|
| ENSMUSG00000070473.4  | Cldn3         | 1.62E-08 | 1.81E-06 | 3 | 3 | 5365.333333 | 294.3333333 | 5071        | 3.667752331 | 4.320501374  | Higher in NONMETA | 5020              | 4922  | 6154  | 426   | 371  | 86   |      |
| ENSMUSG00000027376.15 | Prom2         | 1.71E-08 | 1.90E-06 | 3 | 3 | 827         | 77          | 750         | 3.270169008 | 3.69559348   | Higher in NONMETA | 1071              | 423   | 987   | 139   | 43   | 49   |      |
| ENSMUSG00000018907.10 | Alox12e       | 2.16E-08 | 2.37E-06 | 3 | 3 | 857.666667  | 15          | 842.666667  | 4.393630524 | 5.979038942  | Higher in NONMETA | 1174              | 25    | 1374  | 27    | 8    | 10   |      |
| ENSMUSG00000045319.13 | Proser2       | 2.18E-08 | 2.37E-06 | 3 | 3 | 1073.666667 | 214.666667  | 859         | 2.824801748 | 3.082372477  | Higher in NONMETA | 610               | 912   | 1699  | 119   | 59   | 466  |      |
| ENSMUSG00000005373.13 | Mlxip1        | 2.45E-08 | 2.63E-06 | 3 | 3 | 585.666667  | 49.6666667  | 536         | 3.390725414 | 3.891225529  | Higher in NONMETA | 187               | 251   | 1319  | 60    | 19   | 70   |      |
| ENSMUSG00000057092.12 | Fxyd3         | 2.95E-08 | 3.13E-06 | 3 | 3 | 1789.666667 | 63          | 1726.666667 | 4.013060408 | 5.032275843  | Higher in NONMETA | 2146              | 211   | 3012  | 129   | 16   | 44   |      |
| ENSMUSG00000029999.14 | Tgfa          | 3.27E-08 | 3.44E-06 | 3 | 3 | 4876.666667 | 482.666667  | 4394        | 3.515271449 | 4.102919139  | Higher in NONMETA | 1530              | 7199  | 5901  | 557   | 100  | 791  |      |
| ENSMUSG00000024186.15 | Rgs11         | 3.36E-08 | 3.52E-06 | 3 | 3 | 374         | 68          | 306         | 2.785239028 | 3.038887524  | Higher in NONMETA | 182               | 243   | 697   | 42    | 28   | 134  |      |
| ENSMUSG00000001722.15 | Csn3          | 3.45E-08 | 3.58E-06 | 3 | 3 | 59790.66667 | 1081        | 58709.66667 | 4.402535634 | 6.103453709  | Higher in NONMETA | 113475            | 1550  | 64347 | 2053  | 274  | 916  |      |
| ENSMUSG0000002111.15  | Itga6         | 3.67E-08 | 3.79E-06 | 3 | 3 | 20765.33333 | 4580.66667  | 16184.66667 | 2.9392105   | 2.707122856  | 2.9392105         | Higher in NONMETA | 29506 | 20262 | 12528 | 3881 | 1755 | 8106 |
| ENSMUSG00000026147.16 | Col9a1        | 4.29E-08 | 4.39E-06 | 3 | 3 | 6602        | 62.6666667  | 6539.333333 | 4.655666121 | 7.482844951  | Higher in NONMETA | 16330             | 48    | 3428  | 52    | 8    | 128  |      |
| ENSMUSG00000040714.14 | Klc3          | 4.59E-08 | 4.66E-06 | 3 | 3 | 958.666667  | 201.3333333 | 757.3333333 | 2.517896139 | 2.703187387  | Higher in NONMETA | 429               | 846   | 1601  | 194   | 123  | 287  |      |
| ENSMUSG00000079330.8  | Lemd1         | 5.08E-08 | 5.10E-06 | 3 | 3 | 187.666667  | 16          | 171.666667  | 3.723405653 | 4.494645449  | Higher in NONMETA | 311               | 118   | 134   | 4     | 3    | 41   |      |
| ENSMUSG00000067889.4  | Sptbn2        | 5.36E-08 | 5.36E-06 | 3 | 3 | 1470.333333 | 108         | 1362.333333 | 3.469653662 | 4.055915325  | Higher in NONMETA | 2595              | 291   | 1525  | 166   | 63   | 95   |      |
| ENSMUSG00000044433.16 | Camsap3       | 5.47E-08 | 5.41E-06 | 3 | 3 | 507.666667  | 36.33333333 | 471.3333333 | 3.383836563 | 3.919984092  | Higher in NONMETA | 381               | 182   | 960   | 64    | 24   | 21   |      |
| ENSMUSG00000006154.13 | Eps8l1        | 5.98E-08 | 5.84E-06 | 3 | 3 | 428.666667  | 32.6666667  | 396         | 3.315615303 | 3.817177672  | Higher in NONMETA | 368               | 192   | 726   | 53    | 29   | 16   |      |
| ENSMUSG00000009633.3  | G0s2          | 7.72E-08 | 7.43E-06 | 3 | 3 | 2039.666667 | 469.3333333 | 1570.333333 | 2.571636048 | 2.778369283  | Higher in NONMETA | 1242              | 2149  | 2728  | 499   | 140  | 769  |      |
| ENSMUSG00000024903.10 | Lao1          | 7.92E-08 | 7.58E-06 | 3 | 3 | 135.666667  | 9           | 126.666667  | 3.713327619 | 4.5188839749 | Higher in NONMETA | 100               | 59    | 248   | 9     | 0    | 18   |      |
| ENSMUSG00000038167.6  | Plekhg6       | 8.04E-08 | 7.64E-06 | 3 | 3 | 536         | 66.33333333 | 469.666667  | 3.049128256 | 3.423798642  | Higher in NONMETA | 205               | 240   | 1163  | 66    | 25   | 108  |      |
| ENSMUSG00000035818.13 | Plekhs1       | 8.18E-08 | 7.72E-06 | 3 | 3 | 2437        | 37.33333333 | 2399.666667 | 4.430265667 | 6.531069377  | Higher in NONMETA | 4676              | 20    | 2615  | 47    | 8    | 57   |      |
| ENSMUSG00000020159.8  | Gabbr         | 9.38E-08 | 8.80E-06 | 3 | 3 | 1780.333333 | 28          | 1752.333333 | 4.34411589  | 6.214966458  | Higher in NONMETA | 1691              | 19    | 3631  | 45    | 8    | 31   |      |
| ENSMUSG00000030494.13 | Rhpn2         | 1.16E-07 | 1.08E-05 | 3 | 3 | 656.666667  | 115.3333333 | 541.3333333 | 2.82979585  | 3.12597279   | Higher in NONMETA | 732               | 253   | 985   | 104   | 24   | 218  |      |
| ENSMUSG00000026822.14 | Lcn2          | 1.19E-07 | 1.10E-05 | 3 | 3 | 127293.6667 | 1718.666667 | 125575      | 4.394956009 | 6.53155308   | Higher in NONMETA | 289220            | 1275  | 91386 | 3023  | 715  | 1418 |      |
| ENSMUSG0000002297.14  | Fzd6          | 1.20E-07 | 1.10E-05 | 3 | 3 | 2039        | 902.666667  | 1136.333333 | 1.701811147 | 1.758197335  | Higher in NONMETA | 2202              | 1242  | 2673  | 573   | 487  | 1648 |      |
| ENSMUSG00000038980.1  | Rbbp8nl       | 1.59E-07 | 1.43E-05 | 3 | 3 | 97.66666667 | 2.66666667  | 95          | 4.053098686 | 5.480656079  | Higher in NONMETA | 115               | 38    | 140   | 7     | 0    | 1    |      |
| ENSMUSG00000019039.13 | Dalrd3        | 1.62E-07 | 1.45E-05 | 3 | 3 | 1534.333333 | 526.3333333 | 1008        | 1.868426984 | 1.945918466  | Higher in NONMETA | 1072              | 1113  | 2418  | 538   | 343  | 698  |      |
| ENSMUSG00000021638.12 | Ocln          | 1.69E-07 | 1.50E-05 | 3 | 3 | 887.3333333 | 77          | 810.3333333 | 3.514268224 | 4.206093386  | Higher in NONMETA | 432               | 1074  | 1156  | 113   | 7    | 111  |      |
| ENSMUSG00000040350.16 | Trim7         | 1.75E-07 | 1.55E-05 | 3 | 3 | 342         | 100.666667  | 241.3333333 | 2.351671169 | 2.515441333  | Higher in NONMETA | 308               | 376   | 342   | 75    | 38   | 189  |      |
| ENSMUSG00000045180.13 | Shroom2       | 1.89E-07 | 1.66E-05 | 3 | 3 | 790.666667  | 339         | 451.666667  | 1.684326561 | 1.740828703  | Higher in NONMETA | 868               | 570   | 934   | 348   | 176  | 493  |      |
| ENSMUSG00000089876.3  | Tmem102       | 1.96E-07 | 1.70E-05 | 3 | 3 | 641         | 95.6666667  | 545.3333333 | 2.898346918 | 3.237261677  | Higher in NONMETA | 802               | 677   | 444   | 149   | 51   | 87   |      |
| ENSMUSG00000020758.15 | Itgb4         | 2.05E-07 | 1.77E-05 | 3 | 3 | 8197.666667 | 1449.666667 | 6748        | 3.01002125  | 3.398687816  | Higher in NONMETA | 5143              | 11220 | 8230  | 1176  | 260  | 2913 |      |
| ENSMUSG00000029422.1  | Ovol1         | 2.08E-07 | 1.79E-05 | 3 | 3 | 279         | 7.66666667  | 271.3333333 | 3.947762677 | 5.189370526  | Higher in NONMETA | 153               | 20    | 664   | 10    | 7    | 6    |      |
| ENSMUSG00000047281.3  | Sfn           | 2.26E-07 | 1.93E-05 | 3 | 3 | 8727.666667 | 1219.333333 | 7508.333333 | 2.935062073 | 3.29332611   | Higher in NONMETA | 2086              | 5959  | 18138 | 1016  | 603  | 2039 |      |
| ENSMUSG00000019590.16 | Cyb561        | 2.77E-07 | 2.33E-05 | 3 | 3 | 2086        | 807.666667  | 1278.333333 | 1.938839844 | 2.029735198  | Higher in NONMETA | 2024              | 2233  | 2001  | 686   | 408  | 1329 |      |
| ENSMUSG00000054662.8  | Ano9          | 3.13E-07 | 2.62E-05 | 3 | 3 | 421         | 10.33333333 | 410.666667  | 3.988960596 | 5.372444615  | Higher in NONMETA | 57                | 205   | 1001  | 22    | 6    | 3    |      |
| ENSMUSG00000068299.11 | Nat8f4        | 3.17E-07 | 2.64E-05 | 3 | 3 | 254.3333333 | 85.6666667  | 168.666667  | 2.08214199  | 2.19787122   | Higher in NONMETA | 210               | 268   | 285   | 71    | 45   | 141  |      |
| ENSMUSG00000023019.12 | Gpd1          | 3.25E-07 | 2.68E-05 | 3 | 3 | 6452        | 174.666667  | 6277.333333 | 4.012910801 | 5.423413119  | Higher in NONMETA | 4628              | 134   | 14594 | 266   | 49   | 209  |      |
| ENSMUSG00000037145.14 | Z210407C18Rik | 3.35E-07 | 2.75E-05 | 3 | 3 | 179.3333333 | 3.66666667  | 175.666667  | 4.187780488 | 6.128910982  | Higher in NONMETA | 366               | 5     | 167   | 4     | 1    | 6    |      |
| ENSMUSG00000060962.12 | Dmkn          | 4.25E-07 | 3.45E-05 | 3 | 3 | 4446.333333 | 36          | 4410.333333 | 4.360694433 | 7.289604374  | Higher in NONMETA | 1124              | 9     | 12206 | 4     | 13   | 72   |      |
| ENSMUSG00000048485.8  | Inka2         | 4.70E-07 | 3.79E-05 | 3 | 3 | 456.3333333 | 61.33333333 | 395         | 2.945406559 | 3.337048077  | Higher in NONMETA | 803               | 331   | 235   | 48    | 62   | 74   |      |
| ENSMUSG00000062115.15 | Rai1          | 4.75E-07 | 3.81E-05 | 3 | 3 | 2657        | 1463        | 1194        | 1.412278913 | 1.447305773  | Higher in NONMETA | 2543              | 2199  | 3229  | 1260  | 736  | 2393 |      |
| ENSMUSG00000020634.12 | Ubxn2a        | 4.83E-07 | 3.86E-05 | 3 | 3 | 1626.333333 | 758         | 868.3333333 | 1.621898055 | 1.675919947  | Higher in NONMETA | 1811              | 1336  | 1732  | 732   | 388  | 1163 |      |
| ENSMUSG00000028544.14 | Slc5a9        | 5.14E-07 | 4.08E-05 | 3 | 3 | 979.3333333 | 17.33333333 | 962         | 4.215267481 | 6.408953688  | Higher in NONMETA | 1364              | 6     | 1568  | 15    | 2    | 35   |      |
| ENSMUSG00000001420.13 | Tmem79        | 5.41E-07 | 4.27E-05 | 3 | 3 | 474.666667  | 127.3333333 | 347.3333333 | 2.451956118 | 2.659147275  | Higher in NONMETA | 392               | 408   | 624   | 96    | 28   | 258  |      |
| ENSMUSG00000064314.16 | Sxbp6         | 5.94E-07 | 4.67E-05 | 3 | 3 | 1186.666667 | 152.666667  | 1034        | 2.997814048 | 3.423759877  | Higher in NONMETA | 2299              | 391   | 900   | 211   | 64   | 183  |      |
| ENSMUSG00000036292.14 | Gramd1c       | 6.28E-07 | 4.91E-05 | 3 | 3 | 272.666667  | 113.666667  | 159         | 1.679747469 | 1.741569793  | Higher in NONMETA | 252               | 216   | 350   | 96    | 80   | 165  |      |
| ENSMUSG00000026304.13 | Rab17         | 6.38E-07 | 4.96E-05 | 3 | 3 | 410.666667  | 30.33333333 | 380.3333333 | 3.607217678 | 4.517017202  | Higher in NONMETA | 882               | 54    | 296   | 18    | 7    | 66   |      |
| ENSMUSG00000021097.15 | Clnn          | 6.68E-07 | 5.14E-05 | 3 | 3 | 1645.666667 | 106.666667  | 1539        | 3.511813585 | 4.323895758  | Higher in NONMETA | 2587              | 87    | 2263  | 106   | 57   | 157  |      |
| ENSMUSG00000029102.9  | Hgfac         | 7.94E-07 | 6.01E-05 | 3 | 3 | 231         | 3.66666667  | 227.3333333 | 4.215679975 | 6.78348551   | Higher in NONMETA | 4                 | 290   | 399   | 3     | 0    | 8    |      |
| ENSMUSG00000069892.9  | 9930111J21Rik | 8.03E-07 | 6.04E-05 | 3 | 3 | 415.666667  | 169         | 246.666667  | 1.710612481 | 1.777332383  | Higher in NONMETA | 490               | 242   | 515   | 134   | 113  | 260  |      |
| ENSMUSG00000041372.10 | B4galnt3      | 8.53E-07 | 6.33E-05 | 3 | 3 | 343.666667  | 9.66666667  | 334         | 4.146661192 | 6.350797294  | Higher in NONMETA | 19                | 870   | 142   | 6     | 1    | 22   |      |
| ENSMUSG0000000706.15  | Btn1a1        | 8.98E-07 | 6.63E-05 | 3 | 3 | 1487        | 188         | 1299        | 2.966079305 | 3.39347684   | Higher in NONMETA | 1474              | 362   | 2625  | 257   | 42   | 265  |      |
| ENSMUSG00000072825.11 | Cep170b       | 9.31E-07 | 6.84E-05 | 3 | 3 | 5833.333333 | 1893.666667 | 3939.666667 | 2.192311062 | 2.342559742  | Higher in NONMETA | 4770              | 7505  | 5225  | 1666  | 867  | 3148 |      |
| ENSMUSG00000029859.6  | Epha1         | 9.70E-07 | 7.09E-05 | 3 | 3 | 725.3333333 | 182.666667  | 542.666667  | 2.587375177 | 2.850915797  | Higher in NONMETA | 521               | 724   | 931   | 68    | 57   | 423  |      |
| ENSMUSG0000001552.14  | Jup           | 1.00E-06 | 7.23E-05 | 3 | 3 | 10911.33333 | 4025        | 6886.333333 | 1.842903897 | 1.928997204  | Higher in NONMETA | 8886              | 9499  | 14349 | 4887  | 1972 | 5216 |      |
| ENSMUSG00000027356.8  | Fermt1        | 1.14E-06 | 8.16E-05 | 3 | 3 | 2837        | 139.666667  | 2697.333333 | 3.584584781 | 4.544965271  | Higher in NONMETA | 1815              | 4731  | 1965  | 110   | 265  | 44   |      |
| ENSMUSG00000030688.15 | Stard10       | 1.20E-06 | 8.52E-05 | 3 | 3 | 3791        | 735         | 3056        | 2.45723368  | 2.683039193  | Higher in NONMETA | 3563              | 3972  | 3838  | 710   | 831  | 633  |      |
| ENSMUSG00000035873.8  | Pawr          | 1.20E-06 | 8.52E-05 | 3 | 3 | 927.3333333 | 232.666667  | 694.666667  | 2.318599813 | 2.504048166  | Higher in NONMETA | 1005              | 664   | 1113  | 331   | 74   | 293  |      |
| ENSMUSG00000028262.13 | C1ca3a2       | 1.25E-06 | 8.85E-05 | 3 | 3 | 5416.666667 | 108.666667  | 5308        | 3.979593043 | 5.731635906  | Higher in NONMETA | 4661              | 64    | 11525 | 218   | 35   | 73   |      |
| ENSMUSG00000074121.3  | Ntf5          | 1.28E-06 | 8.96E-05 | 3 | 3 | 361         | 44.6666667  | 316.3333333 | 3.054060441 | 3.550337397  | Higher in NONMETA | 440               | 68    | 575   | 43    | 10   | 81   |      |
| ENSMUSG00000062157.6  | Iflnr1        | 1.33E-06 | 9.23E-05 | 3 | 3 | 645.666667  | 54.33333333 | 591.3333333 | 3.736019287 | 3.736019287  | Higher in NONMETA | 778               | 78    | 1081  | 69    | 40   | 52   |      |

|                       |               |          |             |   |   |             |             |             |             |             |                   |       |      |       |      |      |       |
|-----------------------|---------------|----------|-------------|---|---|-------------|-------------|-------------|-------------|-------------|-------------------|-------|------|-------|------|------|-------|
| ENSMUSG00000034949.18 | Zfr2          | 2.50E-06 | 0.000152432 | 3 | 3 | 112         | 39          | 73          | 1.978226689 | 2.096148971 | Higher in NONMETA | 96    | 94   | 146   | 32   | 20   | 65    |
| ENSMUSG00000038605.11 | Samd10        | 2.76E-06 | 0.000166185 | 3 | 3 | 608.6666667 | 185.3333333 | 423.3333333 | 2.166449114 | 2.326940701 | Higher in NONMETA | 489   | 682  | 655   | 223  | 73   | 260   |
| ENSMUSG00000021792.15 | Fam213a       | 2.79E-06 | 0.000167768 | 3 | 3 | 2595.666667 | 893.6666667 | 1702        | 1.918276704 | 2.026019024 | Higher in NONMETA | 2413  | 1089 | 4285  | 525  | 528  | 1628  |
| ENSMUSG00000039087.16 | Rreb1         | 2.82E-06 | 0.000168587 | 3 | 3 | 2312.333333 | 1349.666667 | 962.6666667 | 1.305885175 | 1.337881548 | Higher in NONMETA | 2112  | 1781 | 3044  | 1214 | 657  | 2178  |
| ENSMUSG00000004864.12 | Mapk13        | 2.88E-06 | 0.000171856 | 3 | 3 | 2614        | 468         | 2146        | 2.930859205 | 3.397917968 | Higher in NONMETA | 1269  | 3743 | 2830  | 385  | 67   | 952   |
| ENSMUSG00000026915.16 | Strbp         | 3.09E-06 | 0.000183559 | 3 | 3 | 2405        | 1298        | 1107        | 1.327280862 | 1.361240845 | Higher in NONMETA | 2396  | 1810 | 3009  | 1055 | 937  | 1902  |
| ENSMUSG00000026383.14 | Epb41f5       | 3.35E-06 | 0.000197211 | 3 | 3 | 941         | 405.6666667 | 535.3333333 | 1.553529738 | 1.609528254 | Higher in NONMETA | 777   | 665  | 1381  | 407  | 285  | 525   |
| ENSMUSG00000031372.7  | Trex2         | 3.50E-06 | 0.000205423 | 3 | 3 | 73.33333333 | 0.666666667 | 72.66666667 | 4.008426627 | 6.986549078 | Higher in NONMETA | 9     | 13   | 198   | 1    | 0    | 1     |
| ENSMUSG00000057729.12 | Prtm3         | 3.57E-06 | 0.000208361 | 3 | 3 | 2943.666667 | 65          | 2878.666667 | 3.883944918 | 5.814180122 | Higher in NONMETA | 6632  | 23   | 2176  | 23   | 77   | 95    |
| ENSMUSG00000026971.15 | Irgb6         | 3.72E-06 | 0.000216354 | 3 | 3 | 277         | 63          | 214         | 2.379680807 | 2.607362719 | Higher in NONMETA | 350   | 161  | 320   | 91   | 22   | 76    |
| ENSMUSG00000037685.15 | Atp8a1        | 3.98E-06 | 0.000230234 | 3 | 3 | 1907.333333 | 768.3333333 | 1139        | 1.821235055 | 1.915619693 | Higher in NONMETA | 2492  | 1629 | 1601  | 544  | 503  | 1258  |
| ENSMUSG00000024769.7  | Cdc42bpg      | 4.02E-06 | 0.000231959 | 3 | 3 | 3508.666667 | 1205        | 2303.666667 | 2.107514203 | 2.259706629 | Higher in NONMETA | 3150  | 4542 | 2834  | 1086 | 568  | 1961  |
| ENSMUSG00000028555.15 | Ttc39a        | 4.04E-06 | 0.000231959 | 3 | 3 | 951.6666667 | 71.33333333 | 880.3333333 | 3.329235254 | 4.156780742 | Higher in NONMETA | 1888  | 71   | 896   | 96   | 28   | 90    |
| ENSMUSG00000027570.15 | Col9a3        | 4.16E-06 | 0.000237813 | 3 | 3 | 3276.333333 | 117         | 3159.333333 | 3.742906673 | 5.282007347 | Higher in NONMETA | 7948  | 48   | 1833  | 137  | 54   | 160   |
| ENSMUSG00000039865.8  | Slc44a3       | 4.57E-06 | 0.000257599 | 3 | 3 | 650.6666667 | 78          | 572.6666667 | 2.960699269 | 3.476744634 | Higher in NONMETA | 996   | 72   | 884   | 73   | 40   | 121   |
| ENSMUSG00000035936.6  | Aldh5a1       | 4.64E-06 | 0.000260369 | 3 | 3 | 291.3333333 | 128.3333333 | 163         | 1.646605686 | 1.715904626 | Higher in NONMETA | 283   | 162  | 429   | 98   | 64   | 223   |
| ENSMUSG00000003032.12 | Cdh1          | 4.76E-06 | 0.00026624  | 3 | 3 | 1725.66667  | 1299        | 12426.66667 | 3.0672164   | 3.663600807 | Higher in NONMETA | 12575 | 9683 | 18919 | 2986 | 415  | 496   |
| ENSMUSG00000024940.10 | Ltbp3         | 5.62E-06 | 0.000308242 | 3 | 3 | 12802       | 7781        | 5021        | 1.190620989 | 1.216282816 | Higher in NONMETA | 13173 | 9562 | 15671 | 6412 | 5190 | 11741 |
| ENSMUSG00000033256.14 | Shf           | 5.68E-06 | 0.0003103   | 3 | 3 | 3987        | 1617.333333 | 2369.666667 | 1.793969648 | 1.887154614 | Higher in NONMETA | 5333  | 1878 | 4750  | 1106 | 802  | 2944  |
| ENSMUSG00000026437.11 | Cdk18         | 5.81E-06 | 0.000315426 | 3 | 3 | 1272        | 502         | 770         | 1.841906429 | 1.943701009 | Higher in NONMETA | 1287  | 1384 | 1145  | 357  | 358  | 791   |
| ENSMUSG0000004654.14  | Apoc1         | 5.87E-06 | 0.000317003 | 3 | 3 | 1026        | 60          | 966         | 3.463219991 | 4.527708017 | Higher in NONMETA | 1805  | 42   | 1231  | 86   | 14   | 80    |
| ENSMUSG00000024331.11 | Dsc2          | 5.92E-06 | 0.000318751 | 3 | 3 | 2163.666667 | 252         | 1911.666667 | 3.084388563 | 3.713362979 | Higher in NONMETA | 502   | 1015 | 4974  | 190  | 34   | 532   |
| ENSMUSG00000054342.8  | Kcnn4         | 5.97E-06 | 0.000320378 | 3 | 3 | 7091.666667 | 2941.333333 | 4150.333333 | 1.742000176 | 1.827248545 | Higher in NONMETA | 8272  | 6897 | 6106  | 2542 | 2041 | 4241  |
| ENSMUSG00000029438.9  | Bcl7a         | 6.30E-06 | 0.000336281 | 3 | 3 | 1041        | 276.3333333 | 764.6666667 | 2.139272624 | 2.307089221 | Higher in NONMETA | 864   | 321  | 1938  | 208  | 161  | 460   |
| ENSMUSG00000053414.7  | Hunk          | 6.32E-06 | 0.000336281 | 3 | 3 | 2139.666667 | 92.6666667  | 2047        | 3.651191887 | 5.103489776 | Higher in NONMETA | 5059  | 34   | 1326  | 91   | 33   | 154   |
| ENSMUSG00000001249.14 | Hpn           | 6.34E-06 | 0.000336361 | 3 | 3 | 1390        | 133         | 1257        | 3.060151408 | 3.676173989 | Higher in NONMETA | 2300  | 167  | 1703  | 212  | 61   | 126   |
| ENSMUSG00000004791.7  | Pgf           | 6.62E-06 | 0.000347417 | 3 | 3 | 3665.333333 | 1686.66667  | 1978.666667 | 1.671138864 | 1.746556921 | Higher in NONMETA | 2603  | 2913 | 5480  | 970  | 850  | 3240  |
| ENSMUSG00000074272.10 | Ceacam1       | 6.65E-06 | 0.000347571 | 3 | 3 | 4613.666667 | 246.6666667 | 4367        | 3.535443406 | 4.750329724 | Higher in NONMETA | 10419 | 167  | 3255  | 339  | 55   | 346   |
| ENSMUSG00000032062.2  | Z310030G06Rik | 6.92E-06 | 0.000357191 | 3 | 3 | 729.3333333 | 215         | 514.3333333 | 2.093895778 | 2.251879065 | Higher in NONMETA | 867   | 586  | 735   | 305  | 95   | 245   |
| ENSMUSG00000028115.16 | Bnip1         | 7.32E-06 | 0.00037602  | 3 | 3 | 661         | 38.66666667 | 622.3333333 | 3.417862831 | 4.457909737 | Higher in NONMETA | 1067  | 20   | 866   | 48   | 17   | 51    |
| ENSMUSG00000068744.12 | Psrc1         | 8.03E-06 | 0.000407951 | 3 | 3 | 2451.666667 | 118.6666667 | 2333        | 3.484460117 | 4.653146344 | Higher in NONMETA | 6304  | 183  | 868   | 72   | 149  | 135   |
| ENSMUSG00000074796.10 | Slc4a11       | 8.74E-06 | 0.000439579 | 3 | 3 | 3837        | 249         | 3588        | 3.489210633 | 4.685973563 | Higher in NONMETA | 756   | 9072 | 1683  | 488  | 61   | 198   |
| ENSMUSG00000074277.4  | Phldb3        | 8.93E-06 | 0.000446202 | 3 | 3 | 634         | 252.6666667 | 381.3333333 | 1.620679034 | 1.691356138 | Higher in NONMETA | 497   | 392  | 1013  | 219  | 197  | 343   |
| ENSMUSG00000025507.13 | Pidd1         | 8.98E-06 | 0.000447048 | 3 | 3 | 401.6666667 | 163.3333333 | 238.3333333 | 1.655159065 | 1.73091612  | Higher in NONMETA | 425   | 317  | 463   | 137  | 136  | 216   |
| ENSMUSG00000034382.14 | Al661453      | 9.27E-06 | 0.000459933 | 3 | 3 | 1050        | 194.6666667 | 855.3333333 | 2.602188926 | 2.9496434   | Higher in NONMETA | 414   | 1405 | 1331  | 288  | 89   | 207   |
| ENSMUSG00000020541.12 | Tom11         | 9.31E-06 | 0.000460339 | 3 | 3 | 1023.666667 | 537         | 486.6666667 | 1.496315455 | 1.551310273 | Higher in NONMETA | 934   | 689  | 1448  | 397  | 218  | 996   |
| ENSMUSG00000025500.12 | Lmntd2        | 9.41E-06 | 0.000463312 | 3 | 3 | 175.3333333 | 34          | 141.3333333 | 3.157649365 | 3.157649365 | Higher in NONMETA | 132   | 104  | 290   | 10   | 8    | 84    |
| ENSMUSG00000020021.4  | Fgd6          | 9.43E-06 | 0.000463312 | 3 | 3 | 2131.666667 | 876         | 1255.666667 | 1.955596356 | 2.085848578 | Higher in NONMETA | 1758  | 2322 | 2315  | 519  | 320  | 1789  |
| ENSMUSG00000039063.5  | Echdc3        | 1.03E-05 | 0.000500504 | 3 | 3 | 450.3333333 | 224.3333333 | 226         | 1.513510444 | 1.571115368 | Higher in NONMETA | 423   | 266  | 662   | 162  | 106  | 405   |
| ENSMUSG00000049971.7  | Glt1d1        | 1.07E-05 | 0.000514268 | 3 | 3 | 372.3333333 | 26          | 346.3333333 | 3.474385549 | 4.691712232 | Higher in NONMETA | 575   | 37   | 505   | 10   | 1    | 67    |
| ENSMUSG00000039853.18 | Trim14        | 1.10E-05 | 0.000525661 | 3 | 3 | 362         | 120         | 242         | 1.855315672 | 1.967084537 | Higher in NONMETA | 316   | 254  | 516   | 155  | 73   | 132   |
| ENSMUSG00000006411.12 | Nectin4       | 1.12E-05 | 0.000535018 | 3 | 3 | 1723        | 383         | 1340        | 2.350381605 | 2.597869203 | Higher in NONMETA | 682   | 1943 | 2544  | 494  | 238  | 417   |
| ENSMUSG00000061397.7  | Krt79         | 1.13E-05 | 0.000540029 | 3 | 3 | 2000        | 22          | 1978        | 3.823779807 | 6.442410816 | Higher in NONMETA | 1017  | 2    | 4981  | 33   | 18   | 15    |
| ENSMUSG00000068876.14 | Cgn           | 1.14E-05 | 0.0005407   | 3 | 3 | 1159.666667 | 376.3333333 | 783.3333333 | 2.071707455 | 2.232905133 | Higher in NONMETA | 715   | 1356 | 1408  | 435  | 153  | 541   |
| ENSMUSG00000079620.13 | Muc4          | 1.16E-05 | 0.00054731  | 3 | 3 | 511         | 17.33333333 | 493.6666667 | 3.644363553 | 5.335331222 | Higher in NONMETA | 303   | 4    | 1226  | 10   | 5    | 37    |
| ENSMUSG00000040447.15 | Spns2         | 1.18E-05 | 0.000553514 | 3 | 3 | 4457        | 733.6666667 | 3723.333333 | 2.815446347 | 3.297651285 | Higher in NONMETA | 1809  | 8554 | 3008  | 958  | 374  | 869   |
| ENSMUSG00000040443.15 | Timd2         | 1.18E-05 | 0.000553514 | 3 | 3 | 331.3333333 | 13.33333333 | 318         | 3.601825089 | 5.176339358 | Higher in NONMETA | 654   | 4    | 336   | 13   | 4    | 23    |
| ENSMUSG00000047230.6  | Cldn2         | 1.32E-05 | 0.000613457 | 3 | 3 | 160.3333333 | 6.333333333 | 154         | 3.567780843 | 5.104950007 | Higher in NONMETA | 228   | 4    | 249   | 8    | 1    | 10    |
| ENSMUSG00000034285.15 | Nipsnap1      | 1.37E-05 | 0.000636029 | 3 | 3 | 987.6666667 | 250.6666667 | 737         | 2.156286167 | 2.345019019 | Higher in NONMETA | 1490  | 326  | 1147  | 248  | 181  | 323   |
| ENSMUSG00000031958.16 | Ldhd          | 1.43E-05 | 0.000656188 | 3 | 3 | 893.3333333 | 190         | 700.3333333 | 2.290275021 | 2.523430867 | Higher in NONMETA | 507   | 327  | 1837  | 109  | 159  | 302   |
| ENSMUSG00000034362.7  | Csta1         | 1.44E-05 | 0.000658799 | 3 | 3 | 83.33333333 | 3           | 80.33333333 | 3.59703307  | 5.154098762 | Higher in NONMETA | 66    | 4    | 180   | 1    | 2    | 6     |
| ENSMUSG00000037188.7  | Grlh3         | 1.46E-05 | 0.000665493 | 3 | 3 | 286.3333333 | 5.333333333 | 281         | 3.708099171 | 5.87312104  | Higher in NONMETA | 66    | 3    | 790   | 2    | 5    | 9     |
| ENSMUSG00000042010.16 | Acacb         | 1.47E-05 | 0.000668845 | 3 | 3 | 1555        | 110.6666667 | 1444.333333 | 3.161735504 | 3.973225735 | Higher in NONMETA | 838   | 98   | 3729  | 162  | 44   | 126   |
| ENSMUSG00000076434.9  | Wfdc3         | 1.50E-05 | 0.000680288 | 3 | 3 | 401.6666667 | 41          | 360.6666667 | 3.108633966 | 3.863580453 | Higher in NONMETA | 595   | 28   | 582   | 17   | 19   | 87    |
| ENSMUSG00000073968.4  | Trim68        | 1.53E-05 | 0.000690482 | 3 | 3 | 632         | 344.6666667 | 287.3333333 | 1.360070708 | 1.40305034  | Higher in NONMETA | 554   | 407  | 935   | 235  | 201  | 598   |
| ENSMUSG00000025329.3  | Padi1         | 1.56E-05 | 0.000702842 | 3 | 3 | 630.6666667 | 64.33333333 | 566.3333333 | 3.226049797 | 4.128255169 | Higher in NONMETA | 56    | 1285 | 551   | 49   | 33   | 111   |
| ENSMUSG00000027692.16 | Thk           | 1.69E-05 | 0.000754061 | 3 | 3 | 1877.333333 | 464.6666667 | 1412.666667 | 2.344577205 | 2.344577205 | Higher in NONMETA | 2666  | 1032 | 1934  | 666  | 316  | 412   |
| ENSMUSG00000070780.11 | Rbm47         | 1.71E-05 | 0.00076079  | 3 | 3 | 2137        | 696.3333333 | 1440.666667 | 1.946529715 | 2.083940933 | Higher in NONMETA | 3344  | 978  | 2089  | 520  | 517  | 1052  |
| ENSMUSG00000015134.15 | Aldh1a3       | 1.72E-05 | 0.000765268 | 3 | 3 | 5267.666667 | 382.3333333 | 4885.333333 | 3.295305711 | 4.314023347 | Higher in NONMETA | 4413  | 192  | 11198 | 319  | 51   | 777   |
| ENSMUSG00000055976.6  | Cldn23        | 1.77E-05 | 0.000777263 | 3 | 3 | 268.6666667 | 27.33333333 | 241.3333333 | 2.871520368 | 3.429988332 | Higher in NONMETA | 80    | 142  | 584   | 45   | 18   | 19    |
| ENSMUSG00000053797.10 | Krt16         | 1.87E-05 | 0.000816799 | 3 | 3 | 4005.333333 | 131         |             |             |             |                   |       |      |       |      |      |       |

|                        |               |          |             |   |   |             |             |             |             |              |                   |       |       |       |      |      |      |
|------------------------|---------------|----------|-------------|---|---|-------------|-------------|-------------|-------------|--------------|-------------------|-------|-------|-------|------|------|------|
| ENSMUSG00000027901.12  | Dennd2d       | 2.71E-05 | 0.001117659 | 3 | 3 | 625.6666667 | 103         | 522.6666667 | 2.527540669 | 2.889011009  | Higher in NONMETA | 519   | 102   | 1256  | 114  | 52   | 143  |
| ENSMUSG00000015533.8   | Itga2         | 2.86E-05 | 0.001170174 | 3 | 3 | 778         | 132.3333333 | 645.6666667 | 2.889032322 | 3.502936681  | Higher in NONMETA | 141   | 1262  | 931   | 60   | 41   | 296  |
| ENSMUSG00000078954.9   | Arhgap8       | 3.00E-05 | 0.00122443  | 3 | 3 | 992         | 111.6666667 | 880.3333333 | 3.147144847 | 4.055212273  | Higher in NONMETA | 2040  | 109   | 827   | 36   | 16   | 283  |
| ENSMUSG00000057286.6   | St6galnac2    | 3.17E-05 | 0.001288769 | 3 | 3 | 1928.333333 | 185.3333333 | 1743        | 2.960646409 | 3.655878105  | Higher in NONMETA | 4416  | 266   | 1103  | 233  | 163  | 160  |
| ENSMUSG00000039835.16  | Nhs1          | 3.19E-05 | 0.001294434 | 3 | 3 | 5557.666667 | 1238        | 4319.666667 | 2.389846886 | 2.6911140498 | Higher in NONMETA | 9609  | 1938  | 5126  | 1642 | 365  | 1707 |
| ENSMUSG00000028080.16  | Lrba          | 3.31E-05 | 0.001331916 | 3 | 3 | 1242.333333 | 673         | 569.3333333 | 1.36720586  | 1.414913041  | Higher in NONMETA | 1281  | 958   | 1488  | 721  | 326  | 972  |
| ENSMUSG00000029086.15  | Prom1         | 3.32E-05 | 0.001334154 | 3 | 3 | 2913        | 113.6666667 | 2799.333333 | 3.507246925 | 5.292960318  | Higher in NONMETA | 7174  | 24    | 1541  | 141  | 19   | 181  |
| ENSMUSG00000025306.6   | Pad14         | 3.34E-05 | 0.001339495 | 3 | 3 | 3752        | 959.3333333 | 2792.666667 | 2.409202068 | 2.721494331  | Higher in NONMETA | 1235  | 5491  | 4530  | 875  | 342  | 1661 |
| ENSMUSG00000049265.7   | Kcnk3         | 3.44E-05 | 0.001370007 | 3 | 3 | 334.3333333 | 32.66666667 | 301.6666667 | 2.890309453 | 3.529840481  | Higher in NONMETA | 250   | 30    | 723   | 21   | 30   | 47   |
| ENSMUSG00000027318.17  | Adam33        | 3.45E-05 | 0.001370007 | 3 | 3 | 260.6666667 | 95.66666667 | 165         | 1.744187976 | 1.848660688  | Higher in NONMETA | 205   | 126   | 451   | 73   | 64   | 150  |
| ENSMUSG00000021795.9   | Sftpd         | 3.55E-05 | 0.001404904 | 3 | 3 | 174.3333333 | 19          | 155.3333333 | 3.091049148 | 3.952215487  | Higher in NONMETA | 287   | 23    | 213   | 11   | 2    | 44   |
| ENSMUSG00000025505.16  | Tmem80        | 3.60E-05 | 0.001414534 | 3 | 3 | 658         | 346.6666667 | 311.3333333 | 1.373890758 | 1.422837607  | Higher in NONMETA | 802   | 400   | 772   | 316  | 204  | 520  |
| ENSMUSG00000033006.9   | Sox10         | 3.66E-05 | 0.001433333 | 3 | 3 | 6217        | 222.3333333 | 5994.666667 | 3.467473652 | 5.1584142    | Higher in NONMETA | 12227 | 41    | 6383  | 400  | 52   | 215  |
| ENSMUSG00000002459.17  | Rgs20         | 3.71E-05 | 0.001449333 | 3 | 3 | 388.3333333 | 134.6666667 | 253.6666667 | 1.950198817 | 2.102272527  | Higher in NONMETA | 521   | 149   | 495   | 109  | 53   | 242  |
| ENSMUSG00000021567.15  | Nkd2          | 3.77E-05 | 0.001469687 | 3 | 3 | 9338.333333 | 994.6666667 | 8343.666667 | 2.923762544 | 3.602460942  | Higher in NONMETA | 20050 | 1116  | 6849  | 1602 | 421  | 961  |
| ENSMUSG00000026768.10  | Itga8         | 3.83E-05 | 0.001483807 | 3 | 3 | 1822.333333 | 136.3333333 | 1686        | 3.216855139 | 4.289696222  | Higher in NONMETA | 3322  | 44    | 2101  | 146  | 30   | 233  |
| ENSMUSG00000038859.7   | Baiap2f1      | 3.85E-05 | 0.001489161 | 3 | 3 | 699         | 240.3333333 | 458.6666667 | 1.99770586  | 2.163633633  | Higher in NONMETA | 1177  | 378   | 542   | 168  | 130  | 423  |
| ENSMUSG00000053693.15  | Mast1         | 3.93E-05 | 0.001510477 | 3 | 3 | 158.6666667 | 46.66666667 | 112         | 2.205563798 | 2.439002415  | Higher in NONMETA | 175   | 112   | 189   | 14   | 28   | 98   |
| ENSMUSG0000002786.15   | Tmem54        | 3.99E-05 | 0.001526628 | 3 | 3 | 465.3333333 | 90          | 375.3333333 | 2.394838831 | 2.709320384  | Higher in NONMETA | 711   | 116   | 569   | 51   | 87   | 132  |
| ENSMUSG00000026870.19  | Cutal         | 4.00E-05 | 0.001527932 | 3 | 3 | 155         | 32.66666667 | 122.3333333 | 2.586850339 | 3.006921923  | Higher in NONMETA | 86    | 270   | 109   | 30   | 17   | 51   |
| ENSMUSG00000033268.8   | Duox1         | 4.07E-05 | 0.001538438 | 3 | 3 | 708.3333333 | 61.33333333 | 647         | 3.171019561 | 4.18081073   | Higher in NONMETA | 1197  | 20    | 908   | 35   | 17   | 132  |
| ENSMUSG00000058897.17  | Col25a1       | 4.13E-05 | 0.001554391 | 3 | 3 | 1280.666667 | 89          | 1191.666667 | 3.343305578 | 4.709401837  | Higher in NONMETA | 3036  | 38    | 768   | 47   | 11   | 209  |
| ENSMUSG00000035638.14  | Muc20         | 4.15E-05 | 0.001560544 | 3 | 3 | 376         | 19.33333333 | 356.6666667 | 3.26483482  | 4.462718084  | Higher in NONMETA | 489   | 7     | 632   | 29   | 11   | 18   |
| ENSMUSG00000049128.7   | Isl           | 4.17E-05 | 0.001563391 | 3 | 3 | 405.6666667 | 8.666666667 | 397         | 3.604215546 | 6.256587221  | Higher in NONMETA | 165   | 8     | 1044  | 0    | 1    | 25   |
| ENSMUSG00000031150.12  | Ccdc120       | 4.20E-05 | 0.001569265 | 3 | 3 | 979.6666667 | 531.6666667 | 448         | 1.38399401  | 1.435023312  | Higher in NONMETA | 821   | 919   | 1199  | 526  | 282  | 787  |
| ENSMUSG00000016526.8   | Dyrk3         | 4.24E-05 | 0.001580374 | 3 | 3 | 1691.666667 | 388.6666667 | 1303        | 2.392140426 | 2.7073874    | Higher in NONMETA | 2918  | 1500  | 657   | 466  | 214  | 486  |
| ENSMUSG00000027375.14  | Mal           | 4.26E-05 | 0.001583699 | 3 | 3 | 401.6666667 | 38          | 363.6666667 | 3.146135802 | 4.128824982  | Higher in NONMETA | 76    | 793   | 336   | 68   | 6    | 40   |
| ENSMUSG00000078234.6   | Klhdc7a       | 4.27E-05 | 0.001583699 | 3 | 3 | 2226.666667 | 124         | 2102.666667 | 3.232458037 | 4.364067976  | Higher in NONMETA | 2059  | 90    | 4531  | 246  | 19   | 107  |
| ENSMUSG00000006471.18  | Ndor1         | 4.30E-05 | 0.001591264 | 3 | 3 | 1625        | 1006        | 619         | 1.257715619 | 1.29558798   | Higher in NONMETA | 1434  | 1151  | 2290  | 742  | 344  | 1822 |
| ENSMUSG00000033617.16  | Etl4          | 4.34E-05 | 0.001592698 | 3 | 3 | 1901.333333 | 734.6666667 | 1166.666667 | 1.809406368 | 1.708836905  | Higher in NONMETA | 1698  | 1634  | 2372  | 999  | 493  | 812  |
| ENSMUSG00000078606.8   | Gm4070        | 4.38E-05 | 0.001596818 | 3 | 3 | 455         | 49.66666667 | 405.3333333 | 2.775344886 | 3.337289148  | Higher in NONMETA | 1434  | 63    | 1118  | 48   | 36   | 65   |
| ENSMUSG00000029188.14  | Slc34a2       | 4.38E-05 | 0.001596818 | 3 | 3 | 234         | 26          | 208         | 3.014768882 | 3.817082969  | Higher in NONMETA | 483   | 22    | 247   | 22   | 5    | 51   |
| ENSMUSG00000035967.15  | Lnts6l        | 4.39E-05 | 0.001596818 | 3 | 3 | 758         | 399.6666667 | 358.3333333 | 1.437564613 | 1.495346869  | Higher in NONMETA | 611   | 478   | 1185  | 259  | 197  | 743  |
| ENSMUSG00000028836.14  | Slc30a2       | 4.39E-05 | 0.001596818 | 3 | 3 | 1028.666667 | 33          | 995.6666667 | 3.51294765  | 5.553640778  | Higher in NONMETA | 2876  | 8     | 202   | 16   | 23   | 60   |
| ENSMUSG00000020264.5   | Slc36a2       | 4.45E-05 | 0.001609731 | 3 | 3 | 596.3333333 | 68          | 528.3333333 | 2.865944911 | 3.508228692  | Higher in NONMETA | 466   | 65    | 1258  | 86   | 13   | 105  |
| ENSMUSG00000024913.16  | Lrp5          | 4.46E-05 | 0.001609731 | 3 | 3 | 7203.333333 | 3439.333333 | 3764        | 1.480699638 | 1.544358937  | Higher in NONMETA | 7430  | 6223  | 7957  | 4026 | 2039 | 4253 |
| ENSMUSG00000041936.18  | Agri          | 4.54E-05 | 0.001628868 | 3 | 3 | 13498       | 5568.333333 | 7929.666667 | 1.736252058 | 1.842753578  | Higher in NONMETA | 8708  | 14994 | 16792 | 6207 | 2731 | 7767 |
| ENSMUSG00000028640.11  | Tfap2c        | 4.72E-05 | 0.00168734  | 3 | 3 | 3154        | 116.3333333 | 3037.666667 | 3.417281793 | 5.077294115  | Higher in NONMETA | 5341  | 35    | 4086  | 233  | 14   | 102  |
| ENSMUSG00000019851.8   | Perp          | 4.84E-05 | 0.001723072 | 3 | 3 | 11573.66667 | 1798.666667 | 9775        | 2.983278902 | 3.762055253  | Higher in NONMETA | 3672  | 13176 | 17873 | 269  | 206  | 4921 |
| ENSMUSG00000043782.8   | Bicd2         | 5.05E-05 | 0.001793633 | 3 | 3 | 189         | 36.33333333 | 152.6666667 | 2.367622842 | 2.681230228  | Higher in NONMETA | 80    | 152   | 335   | 52   | 23   | 34   |
| ENSMUSG00000021696.8   | Elovl7        | 5.06E-05 | 0.001793633 | 3 | 3 | 990.3333333 | 208.6666667 | 781.6666667 | 2.50097605  | 2.882621309  | Higher in NONMETA | 590   | 1227  | 1154  | 323  | 37   | 266  |
| ENSMUSG00000024479.2   | Mal2          | 5.08E-05 | 0.001798197 | 3 | 3 | 1962.666667 | 90          | 1872.666667 | 3.380415908 | 4.953941093  | Higher in NONMETA | 4837  | 16    | 1035  | 106  | 36   | 128  |
| ENSMUSG00000019647.16  | Sema6a        | 5.18E-05 | 0.001823833 | 3 | 3 | 1654.333333 | 672.3333333 | 982         | 1.871474102 | 2.010185717  | Higher in NONMETA | 1855  | 1607  | 1501  | 699  | 197  | 1121 |
| ENSMUSG00000030935.15  | Acs3          | 5.40E-05 | 0.001892763 | 3 | 3 | 120.3333333 | 23.66666667 | 96.6666667  | 2.516519663 | 2.909467384  | Higher in NONMETA | 77    | 43    | 241   | 16   | 6    | 49   |
| ENSMUSG00000035640.18  | Cbarp         | 5.52E-05 | 0.00192442  | 3 | 3 | 690.6666667 | 313.6666667 | 377         | 1.49288151  | 1.560046891  | Higher in NONMETA | 514   | 468   | 1090  | 214  | 245  | 482  |
| ENSMUSG00000027513.11  | Pck1          | 5.58E-05 | 0.00193496  | 3 | 3 | 1988.666667 | 149         | 1839.666667 | 3.107931267 | 4.087454888  | Higher in NONMETA | 1837  | 192   | 3937  | 249  | 9    | 189  |
| ENSMUSG00000072949.6   | Acot1         | 5.68E-05 | 0.001957635 | 3 | 3 | 1533.666667 | 155.3333333 | 1378.333333 | 2.993357248 | 3.812144313  | Higher in NONMETA | 3301  | 76    | 1224  | 160  | 65   | 241  |
| ENSMUSG00000040502.5   | 9-Mar         | 5.72E-05 | 0.00196482  | 3 | 3 | 556         | 169.3333333 | 386.6666667 | 2.449257959 | 2.449254788  | Higher in NONMETA | 257   | 596   | 815   | 146  | 41   | 321  |
| ENSMUSG00000027186.14  | Elf5          | 6.07E-05 | 0.002075248 | 3 | 3 | 3501.666667 | 183.3333333 | 3318.333333 | 3.242524115 | 4.507855457  | Higher in NONMETA | 4945  | 79    | 5481  | 367  | 32   | 151  |
| ENSMUSG00000054702.14  | Ap1s3         | 6.12E-05 | 0.002089921 | 3 | 3 | 335.6666667 | 109         | 226.6666667 | 1.883371093 | 2.028671973  | Higher in NONMETA | 422   | 227   | 358   | 150  | 64   | 113  |
| ENSMUSG000000105096.1  | Gbp10         | 6.16E-05 | 0.00209764  | 3 | 3 | 547         | 42.33333333 | 504.6666667 | 3.145849985 | 4.216255696  | Higher in NONMETA | 949   | 11    | 1048  | 29   | 11   | 87   |
| ENSMUSG000000066894.14 | Vsig10        | 6.27E-05 | 0.002128425 | 3 | 3 | 1061.666667 | 646         | 415.6666667 | 1.206521366 | 1.241394724  | Higher in NONMETA | 582   | 942   | 1294  | 574  | 40   | 958  |
| ENSMUSG00000070305.10  | Mplz1         | 6.38E-05 | 0.002162472 | 3 | 3 | 1239        | 453.3333333 | 785.6666667 | 1.791033663 | 1.914544211  | Higher in NONMETA | 1051  | 1427  | 1239  | 415  | 402  | 543  |
| ENSMUSG00000021188.14  | Trip11        | 6.48E-05 | 0.002189657 | 3 | 3 | 2449        | 1623.666667 | 825.3333333 | 1.178130438 | 1.210620293  | Higher in NONMETA | 2170  | 2025  | 3152  | 1238 | 779  | 2854 |
| ENSMUSG00000034177.15  | Rnf43         | 6.71E-05 | 0.00226166  | 3 | 3 | 535         | 55.33333333 | 479.6666667 | 2.928965017 | 3.696692515  | Higher in NONMETA | 861   | 26    | 718   | 64   | 20   | 82   |
| ENSMUSG00000039238.6   | Zfp750        | 6.72E-05 | 0.00226166  | 3 | 3 | 579.6666667 | 15.66666667 | 564         | 3.392393642 | 5.202903465  | Higher in NONMETA | 171   | 19    | 1549  | 38   | 2    | 7    |
| ENSMUSG00000039529.8   | Atp8b1        | 6.84E-05 | 0.002292615 | 3 | 3 | 1299.666667 | 527         | 772.6666667 | 1.756385599 | 1.756385599  | Higher in NONMETA | 833   | 1084  | 1982  | 640  | 260  | 681  |
| ENSMUSG00000041287.5   | Sox15         | 6.87E-05 | 0.002294942 | 3 | 3 | 114.3333333 | 3.666666667 | 110.6666667 | 3.345426385 | 5.032643936  | Higher in NONMETA | 18    | 7     | 318   | 5    | 2    | 4    |
| ENSMUSG00000026831.16  | 1700007K13Rik | 7.05E-05 | 0.002349447 | 3 | 3 | 38.33333333 | 1.333333333 | 37          | 3.402836215 | 5.443142321  | Higher in NONMETA | 90    | 8     | 17    | 2    | 0    | 2    |
| ENSMUSG00000003134.10  | Tbc1d8        | 7.25E-05 | 0.002410398 | 3 | 3 | 1224        | 533         | 691         | 1.594368895 | 1.680294919  | Higher in NONMETA | 1191  | 1160  | 1321  | 655  | 315  | 629  |
| ENSMUSG000000          |               |          |             |   |   |             |             |             |             |              |                   |       |       |       |      |      |      |

|                        |               |             |             |   |   |              |              |              |             |             |                   |       |      |       |      |      |      |
|------------------------|---------------|-------------|-------------|---|---|--------------|--------------|--------------|-------------|-------------|-------------------|-------|------|-------|------|------|------|
| ENSMUSG00000053062.15  | Jam2          | 9.73E-05    | 0.003029391 | 3 | 3 | 1063         | 465.6666667  | 597.3333333  | 1.761803097 | 1.885771955 | Higher in NONMETA | 1032  | 1291 | 866   | 450  | 211  | 736  |
| ENSMUSG00000051397.5   | Tacstd2       | 9.77E-05    | 0.003033591 | 3 | 3 | 3038         | 135          | 2903         | 3.214804783 | 4.605838711 | Higher in NONMETA | 47    | 1547 | 7520  | 265  | 53   | 87   |
| ENSMUSG00000030994.15  | D7Ertdd43e    | 9.88E-05    | 0.003063669 | 3 | 3 | 137          | 39           | 98           | 2.182420133 | 2.440834602 | Higher in NONMETA | 219   | 70   | 122   | 18   | 24   | 75   |
| ENSMUSG00000045349.15  | Sh2d5         | 9.93E-05    | 0.003070943 | 3 | 3 | 3307.3333333 | 978          | 2329.3333333 | 2.183239573 | 2.441806784 | Higher in NONMETA | 1116  | 2913 | 5893  | 395  | 444  | 2095 |
| ENSMUSG00000028454.16  | Pigo          | 9.95E-05    | 0.003070943 | 3 | 3 | 985          | 625.6666667  | 359.3333333  | 1.181035587 | 1.215631573 | Higher in NONMETA | 800   | 765  | 1390  | 539  | 303  | 1035 |
| ENSMUSG00000020183.11  | Cpm           | 0.000100784 | 0.003092172 | 3 | 3 | 1175.666667  | 72.66666667  | 1103         | 3.210302391 | 4.603932339 | Higher in NONMETA | 3144  | 32   | 351   | 94   | 18   | 106  |
| ENSMUSG00000003227.4   | Edar          | 0.000101458 | 0.00310505  | 3 | 3 | 501.6666667  | 21.66666667  | 480          | 3.378161723 | 5.493612654 | Higher in NONMETA | 1378  | 6    | 121   | 5    | 4    | 56   |
| ENSMUSG00000031200.16  | Mtcp1         | 0.000102645 | 0.00313476  | 3 | 3 | 229.3333333  | 104.6666667  | 124.6666667  | 1.52739361  | 1.605863139 | Higher in NONMETA | 159   | 175  | 354   | 104  | 57   | 153  |
| ENSMUSG00000026185.8   | Igfbbp5       | 0.000103334 | 0.00314937  | 3 | 3 | 43084        | 3281.3333333 | 39802.66667  | 2.981191492 | 3.901207588 | Higher in NONMETA | 63997 | 1663 | 63592 | 6318 | 1285 | 2241 |
| ENSMUSG00000021506.7   | Pitx1         | 0.000105211 | 0.003199699 | 3 | 3 | 600          | 17.33333333  | 582.6666667  | 3.427038702 | 6.013802668 | Higher in NONMETA | 1144  | 1    | 655   | 5    | 1    | 46   |
| ENSMUSG00000063130.4   | Calml3        | 0.000106851 | 0.003240911 | 3 | 3 | 415.3333333  | 18.66666667  | 396.6666667  | 3.296196343 | 5.028943124 | Higher in NONMETA | 502   | 2    | 742   | 17   | 2    | 37   |
| ENSMUSG00000032554.15  | Trf           | 0.000107235 | 0.003240911 | 3 | 3 | 2865.3333333 | 438          | 2427.3333333 | 2.613412538 | 3.129407853 | Higher in NONMETA | 5941  | 380  | 2275  | 570  | 209  | 535  |
| ENSMUSG00000024978.10  | Gpam          | 0.000107847 | 0.003248052 | 3 | 3 | 657.3333333  | 321          | 336.3333333  | 1.492940718 | 1.566250084 | Higher in NONMETA | 599   | 394  | 979   | 330  | 119  | 514  |
| ENSMUSG00000025202.7   | Scd3          | 0.000113959 | 0.003415705 | 3 | 3 | 110.3333333  | 11           | 99.33333333  | 3.010005843 | 4.006559627 | Higher in NONMETA | 229   | 9    | 93    | 7    | 3    | 23   |
| ENSMUSG00000012350.15  | Ehf           | 0.000114759 | 0.003427998 | 3 | 3 | 4711.3333333 | 228.6666667  | 4482.666667  | 3.172209834 | 4.517700898 | Higher in NONMETA | 2615  | 62   | 11457 | 411  | 46   | 229  |
| ENSMUSG00000030337.16  | Vamp1         | 0.000114854 | 0.003427998 | 3 | 3 | 610.3333333  | 228          | 382.3333333  | 1.844135869 | 1.991769858 | Higher in NONMETA | 382   | 302  | 1147  | 126  | 96   | 462  |
| ENSMUSG00000006218.4   | Fam131c       | 0.000117871 | 0.003494461 | 3 | 3 | 103.6666667  | 7            | 96.66666667  | 3.167306674 | 4.524873357 | Higher in NONMETA | 197   | 4    | 110   | 6    | 1    | 14   |
| ENSMUSG00000030720.16  | Cln3          | 0.000118564 | 0.003503169 | 3 | 3 | 1937.3333333 | 1301.666667  | 635.6666667  | 1.08411491  | 1.111253201 | Higher in NONMETA | 2171  | 1305 | 2336  | 983  | 791  | 2131 |
| ENSMUSG00000046727.12  | Cystm1        | 0.000121276 | 0.003576037 | 3 | 3 | 2941         | 593          | 2348         | 2.45946777  | 2.874853707 | Higher in NONMETA | 2850  | 4902 | 1071  | 746  | 483  | 550  |
| ENSMUSG00000037110.19  | Ralgapa2      | 0.000123571 | 0.003628999 | 3 | 3 | 940.6666667  | 616.3333333  | 324.3333333  | 1.144535723 | 1.176817854 | Higher in NONMETA | 980   | 604  | 1238  | 511  | 291  | 1047 |
| ENSMUSG000000008167.14 | Fbxw9         | 0.000126069 | 0.003687457 | 3 | 3 | 1746.666667  | 730.3333333  | 1016.3333333 | 1.786857211 | 1.921788303 | Higher in NONMETA | 2505  | 1615 | 1120  | 570  | 450  | 1234 |
| ENSMUSG00000020532.18  | Acaca         | 0.000127706 | 0.003727838 | 3 | 3 | 5166         | 1482         | 3684         | 2.065969027 | 2.287531108 | Higher in NONMETA | 5541  | 1058 | 8899  | 950  | 703  | 2793 |
| ENSMUSG00000044037.15  | Als2cl        | 0.000128062 | 0.003749901 | 3 | 3 | 1098.666667  | 191.3333333  | 907.3333333  | 2.491099714 | 2.932597019 | Higher in NONMETA | 166   | 1092 | 2038  | 242  | 99   | 233  |
| ENSMUSG00000028536.12  | 2610528j11Rik | 0.000129775 | 0.003773069 | 3 | 3 | 206.3333333  | 12.33333333  | 194          | 3.084022251 | 4.273904345 | Higher in NONMETA | 296   | 10   | 313   | 26   | 3    | 8    |
| ENSMUSG00000056973.6   | Ces1d         | 0.000130999 | 0.003799594 | 3 | 3 | 1036.3333333 | 84.66666667  | 951.6666667  | 3.018211069 | 4.062936235 | Higher in NONMETA | 802   | 48   | 2259  | 99   | 6    | 149  |
| ENSMUSG00000028150.14  | Rorc          | 0.000131458 | 0.003799594 | 3 | 3 | 614          | 114.3333333  | 499.6666667  | 2.270481329 | 2.583019878 | Higher in NONMETA | 662   | 153  | 1027  | 171  | 82   | 90   |
| ENSMUSG00000074115.5   | Saa1          | 0.000131471 | 0.003799594 | 3 | 3 | 1022         | 53           | 969          | 3.186521477 | 4.643735509 | Higher in NONMETA | 1574  | 23   | 1469  | 97   | 3    | 59   |
| ENSMUSG00000033508.7   | Asprv1        | 0.000135774 | 0.003916153 | 3 | 3 | 1865.3333333 | 167.3333333  | 1698         | 2.921114477 | 3.811031567 | Higher in NONMETA | 441   | 140  | 5015  | 180  | 32   | 290  |
| ENSMUSG00000041488.16  | Stx3          | 0.000136994 | 0.003943533 | 3 | 3 | 2889.3333333 | 1604.666667  | 1284.666667  | 1.426015059 | 1.49153963  | Higher in NONMETA | 3426  | 2733 | 2509  | 1300 | 875  | 2639 |
| ENSMUSG00000024812.9   | Tjp2          | 0.000143463 | 0.00409729  | 3 | 3 | 6245         | 2150         | 4095         | 1.916703962 | 2.090986536 | Higher in NONMETA | 4329  | 8287 | 6119  | 2859 | 1156 | 2439 |
| ENSMUSG00000063428.8   | Ddo           | 0.000148527 | 0.004233606 | 3 | 3 | 260.6666667  | 31.33333333  | 229.3333333  | 2.829319043 | 3.608685871 | Higher in NONMETA | 283   | 18   | 481   | 26   | 5    | 63   |
| ENSMUSG00000029868.13  | Trpv6         | 0.000151955 | 0.004322842 | 3 | 3 | 585.6666667  | 28           | 557.6666667  | 3.246009143 | 5.034753486 | Higher in NONMETA | 1314  | 29   | 414   | 38   | 0    | 46   |
| ENSMUSG00000040606.13  | Kazn          | 0.000152602 | 0.004332767 | 3 | 3 | 1369.666667  | 486.6666667  | 883          | 1.652851827 | 1.760209363 | Higher in NONMETA | 1422  | 695  | 1992  | 585  | 389  | 486  |
| ENSMUSG00000024726.6   | Zfp397        | 0.000156956 | 0.004447685 | 3 | 3 | 2171.666667  | 1257.666667  | 914          | 1.413494675 | 1.478430463 | Higher in NONMETA | 1688  | 1933 | 2894  | 751  | 561  | 2468 |
| ENSMUSG00000028760.16  | Eif4g3        | 0.000160936 | 0.004533954 | 3 | 3 | 6008.666667  | 4157.666667  | 1851         | 1.091681409 | 1.120592739 | Higher in NONMETA | 5803  | 5099 | 7124  | 3716 | 2058 | 6699 |
| ENSMUSG00000022687.12  | Boc           | 0.000162037 | 0.004556156 | 3 | 3 | 1039.3333333 | 506.6666667  | 532.6666667  | 1.345945705 | 1.401799192 | Higher in NONMETA | 832   | 579  | 1707  | 479  | 350  | 691  |
| ENSMUSG00000034171.13  | Faah          | 0.000164772 | 0.004613755 | 3 | 3 | 296.3333333  | 72.66666667  | 223.6666667  | 2.33804008  | 2.701055671 | Higher in NONMETA | 173   | 519  | 197   | 89   | 40   | 89   |
| ENSMUSG00000057465.5   | Saa2          | 0.000165607 | 0.004629678 | 3 | 3 | 598          | 31.33333333  | 566.6666667  | 3.172526138 | 4.719743992 | Higher in NONMETA | 1014  | 14   | 766   | 51   | 1    | 42   |
| ENSMUSG00000080316.10  | Spaca6        | 0.000168182 | 0.0046747   | 3 | 3 | 1242.666667  | 519          | 723.6666667  | 1.862981919 | 2.02515662  | Higher in NONMETA | 890   | 1211 | 1627  | 178  | 250  | 1129 |
| ENSMUSG00000021950.15  | Anxa8         | 0.000169587 | 0.00470474  | 3 | 3 | 4186         | 2254         | 1932         | 1.320539035 | 1.373444845 | Higher in NONMETA | 2833  | 3256 | 6469  | 2299 | 974  | 3289 |
| ENSMUSG00000027580.17  | Helz2         | 0.000179214 | 0.004936622 | 3 | 3 | 2600.3333333 | 1207         | 1393.3333333 | 1.443332867 | 1.514149868 | Higher in NONMETA | 1528  | 1907 | 4366  | 1007 | 863  | 1751 |
| ENSMUSG00000058886.9   | Deaf1         | 0.000179304 | 0.004936622 | 3 | 3 | 1290.3333333 | 801          | 489.3333333  | 1.093418068 | 1.122922648 | Higher in NONMETA | 1223  | 777  | 1871  | 705  | 524  | 1174 |
| ENSMUSG00000018570.17  | 2810408A11Rik | 0.000182373 | 0.005011638 | 3 | 3 | 192          | 71.66666667  | 120.3333333  | 2.020844737 | 2.237741168 | Higher in NONMETA | 125   | 225  | 226   | 48   | 20   | 147  |
| ENSMUSG00000034227.7   | Foxj1         | 0.000182911 | 0.005016935 | 3 | 3 | 133          | 24.33333333  | 108.6666667  | 2.402636192 | 2.815426025 | Higher in NONMETA | 237   | 47   | 115   | 36   | 14   | 23   |
| ENSMUSG00000039956.8   | Mrap          | 0.00019716  | 0.005384858 | 3 | 3 | 217          | 25.33333333  | 191.6666667  | 2.679297746 | 3.332823018 | Higher in NONMETA | 136   | 17   | 498   | 25   | 14   | 37   |
| ENSMUSG00000040987.14  | Mill2         | 0.000198286 | 0.005397923 | 3 | 3 | 137.3333333  | 45.66666667  | 91.66666667  | 1.862358056 | 2.02978234  | Higher in NONMETA | 88    | 142  | 182   | 52   | 32   | 53   |
| ENSMUSG00000000983.13  | Wfdc18        | 0.000200364 | 0.005434126 | 3 | 3 | 8562         | 632.3333333  | 7929.666667  | 2.92851843  | 3.930453031 | Higher in NONMETA | 10900 | 310  | 14476 | 1337 | 159  | 401  |
| ENSMUSG00000037686.6   | Aspg          | 0.000202953 | 0.005494088 | 3 | 3 | 353.3333333  | 27.66666667  | 325.6666667  | 3.738355255 | 3.738355255 | Higher in NONMETA | 465   | 13   | 582   | 23   | 34   | 26   |
| ENSMUSG00000034981.9   | Parm1         | 0.000203854 | 0.005502591 | 3 | 3 | 2823.666667  | 260.6666667  | 2563         | 2.899020638 | 3.853660647 | Higher in NONMETA | 6040  | 75   | 2356  | 355  | 105  | 322  |
| ENSMUSG00000034282.3   | Evpl          | 0.000204643 | 0.005502591 | 3 | 3 | 471.6666667  | 75.33333333  | 396.3333333  | 2.410058815 | 2.835357992 | Higher in NONMETA | 100   | 407  | 908   | 66   | 60   | 73   |
| ENSMUSG00000038754.4   | Elovl3        | 0.000206977 | 0.005551343 | 3 | 3 | 213          | 6.666666667  | 206.3333333  | 3.252731204 | 5.463831711 | Higher in NONMETA | 352   | 0    | 287   | 7    | 2    | 11   |
| ENSMUSG00000049739.10  | Zfp646        | 0.000209079 | 0.005587098 | 3 | 3 | 1711.3333333 | 1104         | 607.3333333  | 1.1212139   | 1.25375173  | Higher in NONMETA | 1355  | 1440 | 2339  | 866  | 492  | 1954 |
| ENSMUSG00000021375.9   | Kif13a        | 0.000210244 | 0.005607932 | 3 | 3 | 1607.3333333 | 1156.666667  | 450.6666667  | 1.014163004 | 1.038047382 | Higher in NONMETA | 1646  | 1114 | 2062  | 982  | 571  | 1917 |
| ENSMUSG00000055639.16  | Dach1         | 0.000212436 | 0.005656019 | 3 | 3 | 282.3333333  | 128.3333333  | 154          | 1.515452279 | 1.600728924 | Higher in NONMETA | 311   | 251  | 285   | 129  | 97   | 159  |
| ENSMUSG00000034255.17  | Arhgap27      | 0.000214847 | 0.005709754 | 3 | 3 | 1721.3333333 | 805.3333333  | 916          | 1.413319886 | 1.481335387 | Higher in NONMETA | 1351  | 1296 | 2517  | 980  | 502  | 934  |
| ENSMUSG00000022479.15  | Vdr           | 0.000217176 | 0.005750603 | 3 | 3 | 3399.3333333 | 1726.666667  | 1672.666667  | 1.595516179 | 1.696345504 | Higher in NONMETA | 4406  | 1967 | 3825  | 892  | 690  | 3598 |
| ENSMUSG00000014498.9   | Ankrd52       | 0.0002189   | 0.00577522  | 3 | 3 | 2337         | 1498         | 839          | 1.231829426 | 1.275913604 | Higher in NONMETA | 2055  | 2253 | 2703  | 1276 | 711  | 2507 |
| ENSMUSG00000061589.14  | Dot1l         | 0.000225172 | 0.005919218 | 3 | 3 | 2536         | 1597.3333333 | 938.6666667  | 1.105905059 | 1.137486295 | Higher in NONMETA | 2573  | 1554 | 3481  | 1135 | 1115 | 2542 |
| ENSMUSG00000045761.15  | Togaram2      | 0.000226378 | 0.005920837 | 3 | 3 | 755          | 60.33333333  | 694.6666667  | 3.01338098  | 4.241504706 | Higher in NONMETA | 1278  | 7    | 980   | 49   | 14   | 118  |
| ENSMUSG00000019960.    |               |             |             |   |   |              |              |              |             |             |                   |       |      |       |      |      |      |



|                        |          |             |             |   |   |              |              |              |             |             |                   |       |      |       |      |      |      |
|------------------------|----------|-------------|-------------|---|---|--------------|--------------|--------------|-------------|-------------|-------------------|-------|------|-------|------|------|------|
| ENSMUSG00000026450.14  | Chit1    | 0.000295481 | 0.007380434 | 3 | 3 | 102.3333333  | 2            | 100.3333333  | 3.226013628 | 5.993744571 | Higher in NONMETA | 50    | 0    | 257   | 1    | 1    | 4    |
| ENSMUSG00000001665.11  | Gsst3    | 0.000298034 | 0.007431423 | 3 | 3 | 965.6666667  | 459          | 506.6666667  | 1.399586004 | 1.468975214 | Higher in NONMETA | 1182  | 535  | 1180  | 349  | 389  | 639  |
| ENSMUSG00000039196.2   | Orm1     | 0.000303028 | 0.007530126 | 3 | 3 | 448.6666667  | 33.66666667  | 415          | 2.944060014 | 4.126783945 | Higher in NONMETA | 791   | 8    | 547   | 54   | 7    | 40   |
| ENSMUSG00000040154.11  | Wfdc5    | 0.000305142 | 0.007563995 | 3 | 3 | 48           | 1            | 47           | 3.210630995 | 5.93851962  | Higher in NONMETA | 23    | 1    | 120   | 1    | 0    | 2    |
| ENSMUSG00000029307.7   | Dmp1     | 0.000305432 | 0.007563995 | 3 | 3 | 341.6666667  | 45.33333333  | 296.3333333  | 2.67088014  | 3.384902679 | Higher in NONMETA | 611   | 18   | 396   | 48   | 17   | 71   |
| ENSMUSG00000044405.4   | Adig     | 0.00030825  | 0.00761125  | 3 | 3 | 368          | 36.66666667  | 331.3333333  | 2.793917959 | 3.682653561 | Higher in NONMETA | 192   | 23   | 889   | 45   | 5    | 60   |
| ENSMUSG00000073433.10  | Arhgdig  | 0.000308387 | 0.00761125  | 3 | 3 | 222.6666667  | 56           | 166.6666667  | 2.081159711 | 2.34754735  | Higher in NONMETA | 327   | 186  | 155   | 68   | 54   | 46   |
| ENSMUSG00000032496.7   | Ltf      | 0.000309547 | 0.007626914 | 3 | 3 | 9397         | 888.6666667  | 8508.3333333 | 2.705932945 | 3.465934709 | Higher in NONMETA | 8464  | 624  | 19103 | 1814 | 377  | 475  |
| ENSMUSG00000038068.14  | Rnf144b  | 0.00031096  | 0.007648776 | 3 | 3 | 785          | 421.3333333  | 363.6666667  | 1.446254451 | 1.523729061 | Higher in NONMETA | 752   | 425  | 1178  | 299  | 148  | 817  |
| ENSMUSG00000016024.9   | Lbp      | 0.000312911 | 0.007681215 | 3 | 3 | 9883.3333333 | 934.6666667  | 8948.6666667 | 2.805737642 | 3.717014874 | Higher in NONMETA | 22266 | 567  | 6817  | 1803 | 341  | 660  |
| ENSMUSG00000027536.6   | Chmp4c   | 0.000313336 | 0.007681215 | 3 | 3 | 2036.666667  | 689.6666667  | 1347         | 1.755184562 | 1.902209794 | Higher in NONMETA | 1685  | 2132 | 2293  | 831  | 645  | 593  |
| ENSMUSG00000040471.17  | Ggt6     | 0.000315108 | 0.007711665 | 3 | 3 | 86.66666667  | 4.333333333  | 82.33333333  | 3.034309212 | 4.546093896 | Higher in NONMETA | 174   | 4    | 82    | 9    | 2    | 2    |
| ENSMUSG00000041737.8   | Tmem45b  | 0.000326659 | 0.007927612 | 3 | 3 | 408          | 32           | 376          | 2.885029907 | 3.961487625 | Higher in NONMETA | 135   | 12   | 1077  | 35   | 8    | 53   |
| ENSMUSG00000027399.1   | Illa     | 0.000328718 | 0.007951044 | 3 | 3 | 983.6666667  | 136          | 847.6666667  | 2.526398012 | 3.094550631 | Higher in NONMETA | 179   | 569  | 2203  | 250  | 40   | 118  |
| ENSMUSG00000028766.10  | Alpl     | 0.000335806 | 0.008041824 | 3 | 3 | 1123.666667  | 71           | 1052.666667  | 2.892015901 | 3.993989537 | Higher in NONMETA | 1358  | 19   | 1994  | 120  | 58   | 35   |
| ENSMUSG00000024747.3   | Aldh1a7  | 0.000336135 | 0.008041824 | 3 | 3 | 180.3333333  | 11.33333333  | 169          | 2.997533532 | 4.386970032 | Higher in NONMETA | 194   | 2    | 345   | 14   | 2    | 18   |
| ENSMUSG00000032311.17  | Nrg4     | 0.000336344 | 0.008041824 | 3 | 3 | 128.6666667  | 31.66666667  | 97           | 2.184522813 | 2.505590621 | Higher in NONMETA | 124   | 29   | 233   | 19   | 15   | 61   |
| ENSMUSG00000017897.18  | Eya2     | 0.000352957 | 0.008397595 | 3 | 3 | 1161         | 202          | 959          | 2.23766467  | 2.593470009 | Higher in NONMETA | 1686  | 487  | 1310  | 204  | 293  | 109  |
| ENSMUSG00000021223.13  | Papln    | 0.00035547  | 0.008443576 | 3 | 3 | 496.3333333  | 75.66666667  | 420.6666667  | 2.5610426   | 3.174737853 | Higher in NONMETA | 761   | 34   | 694   | 88   | 21   | 118  |
| ENSMUSG00000030546.14  | Plin1    | 0.000359662 | 0.008529207 | 3 | 3 | 1510.666667  | 142          | 1368.666667  | 2.777759541 | 3.680053689 | Higher in NONMETA | 866   | 57   | 3609  | 208  | 25   | 193  |
| ENSMUSG00000042510.7   | AA986860 | 0.000363954 | 0.008601133 | 3 | 3 | 317          | 105.3333333  | 211.6666667  | 2.122360568 | 2.415917005 | Higher in NONMETA | 156   | 515  | 280   | 92   | 37   | 187  |
| ENSMUSG00000046159.16  | Chrm3    | 0.000364447 | 0.008601133 | 3 | 3 | 235          | 20.66666667  | 214.3333333  | 2.928714501 | 4.150788483 | Higher in NONMETA | 292   | 5    | 408   | 14   | 2    | 46   |
| ENSMUSG00000019866.14  | Crybg1   | 0.000366993 | 0.00864665  | 3 | 3 | 3504.3333333 | 1414.3333333 | 2090         | 2.013658115 | 2.256677249 | Higher in NONMETA | 2350  | 4253 | 3910  | 742  | 276  | 3225 |
| ENSMUSG00000028246.13  | Faxc     | 0.000367838 | 0.008652524 | 3 | 3 | 451.6666667  | 220          | 231.6666667  | 1.666083711 | 1.792809186 | Higher in NONMETA | 449   | 478  | 428   | 197  | 66   | 397  |
| ENSMUSG00000010064.15  | Slc38a3  | 0.000371656 | 0.0087822   | 3 | 3 | 284.6666667  | 33.66666667  | 251          | 2.71801409  | 3.521735064 | Higher in NONMETA | 568   | 14   | 272   | 42   | 13   | 46   |
| ENSMUSG00000020566.19  | Atp6v1c2 | 0.000372544 | 0.008734959 | 3 | 3 | 4505.666667  | 181.3333333  | 4324.3333333 | 3.079084735 | 4.876263588 | Higher in NONMETA | 10619 | 33   | 2865  | 431  | 52   | 61   |
| ENSMUSG00000026255.15  | Efh1     | 0.000373578 | 0.008745085 | 3 | 3 | 107.6666667  | 32.66666667  | 75           | 1.898252846 | 2.096887184 | Higher in NONMETA | 110   | 43   | 170   | 40   | 16   | 42   |
| ENSMUSG00000029605.16  | Oas1b    | 0.000381164 | 0.008894412 | 3 | 3 | 571          | 124          | 447          | 2.162898649 | 2.480855754 | Higher in NONMETA | 549   | 89   | 1075  | 75   | 103  | 194  |
| ENSMUSG00000031134.16  | Rbmx     | 0.000382231 | 0.008904642 | 3 | 3 | 1610         | 900.3333333  | 709.6666667  | 1.195530828 | 1.239239796 | Higher in NONMETA | 1647  | 814  | 2369  | 792  | 615  | 1294 |
| ENSMUSG00000047417.17  | Rexo1    | 0.000388881 | 0.009030607 | 3 | 3 | 2216.3333333 | 1370         | 846.3333333  | 1.305844411 | 1.363804934 | Higher in NONMETA | 1873  | 2240 | 2536  | 1177 | 578  | 2355 |
| ENSMUSG00000039481.5   | Nrtn     | 0.000392797 | 0.009081486 | 3 | 3 | 1275.666667  | 98.66666667  | 1177         | 2.843023194 | 3.896003945 | Higher in NONMETA | 2404  | 37   | 1386  | 200  | 42   | 54   |
| ENSMUSG000000303526.11 | Prodh    | 0.000405731 | 0.00931971  | 3 | 3 | 776          | 230.3333333  | 545.6666667  | 2.052661578 | 2.318222702 | Higher in NONMETA | 1565  | 278  | 485   | 190  | 130  | 371  |
| ENSMUSG00000075590.2   | Nrbp2    | 0.000410971 | 0.009382787 | 3 | 3 | 1884.3333333 | 412          | 1472.3333333 | 2.375663846 | 2.838882898 | Higher in NONMETA | 2694  | 191  | 2768  | 248  | 105  | 883  |
| ENSMUSG00000028289.12  | Epha7    | 0.000411146 | 0.009382787 | 3 | 3 | 809.3333333  | 55.33333333  | 754          | 3.014297744 | 4.593945538 | Higher in NONMETA | 1899  | 3    | 526   | 33   | 16   | 117  |
| ENSMUSG00000029165.16  | Agh15    | 0.000417343 | 0.009509281 | 3 | 3 | 707.3333333  | 368.3333333  | 339          | 1.388243895 | 1.45956827  | Higher in NONMETA | 937   | 383  | 802   | 376  | 176  | 553  |
| ENSMUSG00000034917.8   | Tjp3     | 0.000418032 | 0.009510069 | 3 | 3 | 741          | 124.6666667  | 616.3333333  | 2.367183026 | 2.826033895 | Higher in NONMETA | 570   | 63   | 1590  | 124  | 69   | 181  |
| ENSMUSG00000028456.18  | Unc13b   | 0.000422195 | 0.009559887 | 3 | 3 | 656.6666667  | 216.3333333  | 440.3333333  | 2.060103616 | 2.33109959  | Higher in NONMETA | 218   | 826  | 926   | 198  | 63   | 388  |
| ENSMUSG00000026821.15  | Ralgds   | 0.000433375 | 0.009782573 | 3 | 3 | 4504.666667  | 2918.3333333 | 1586.3333333 | 1.198917276 | 1.243904675 | Higher in NONMETA | 5266  | 2753 | 5495  | 2324 | 1207 | 5224 |
| ENSMUSG00000030966.13  | Trim21   | 0.000435471 | 0.009814628 | 3 | 3 | 1420         | 721.3333333  | 698.6666667  | 1.310990449 | 1.37079406  | Higher in NONMETA | 1415  | 640  | 2205  | 553  | 516  | 1095 |
| ENSMUSG00000079559.4   | Colca2   | 0.000437976 | 0.009819334 | 3 | 3 | 109.6666667  | 35.66666667  | 74           | 1.784325025 | 1.95005412  | Higher in NONMETA | 83    | 67   | 179   | 45   | 23   | 39   |
| ENSMUSG00000036304.13  | Zdhhc23  | 0.000438901 | 0.009819334 | 3 | 3 | 65.66666667  | 12.33333333  | 53.33333333  | 2.532129385 | 3.146572777 | Higher in NONMETA | 123   | 23   | 51    | 10   | 2    | 25   |
| ENSMUSG00000032308.7   | S100b    | 0.000439038 | 0.009819334 | 3 | 3 | 480.3333333  | 71.66666667  | 408.6666667  | 2.588886142 | 3.269102143 | Higher in NONMETA | 1025  | 30   | 386   | 46   | 43   | 126  |
| ENSMUSG00000022899.8   | Slc15a2  | 0.000439052 | 0.009819334 | 3 | 3 | 2134         | 514.3333333  | 1619.666667  | 2.328155539 | 2.761882063 | Higher in NONMETA | 4226  | 319  | 1857  | 307  | 159  | 1077 |
| ENSMUSG0000001827.12   | Folr1    | 0.000439057 | 0.009819334 | 3 | 3 | 319.3333333  | 43           | 276.3333333  | 2.638955933 | 3.381924696 | Higher in NONMETA | 425   | 12   | 521   | 34   | 15   | 80   |
| ENSMUSG00000024843.15  | Chka     | 0.000447816 | 0.009984513 | 3 | 3 | 3516         | 2441.3333333 | 1074.666667  | 1.10455879  | 1.139518626 | Higher in NONMETA | 3789  | 2887 | 3872  | 1607 | 1437 | 4280 |
