# Supplementary material for: Mammary-specific expression of Trim24 establishes a mouse model of human metaplastic breast cancer
Source: PubMed Central journal article supplement (PMC8433435; doi:10.1038/s41467-021-25650-z), 2021-09-10
Supplement: 41467_2021_25650_MOESM12_ESM.pdf [file 41467_2021_25650_MOESM12_ESM.pdf]

**Supplementary Table 9: List of human TNBC and MpBC patient tumor details including response to chemotherapy, percentage of vimentin staining and tumor classification.**

| Patient ID | Metaplastic | Vimentin (%) | Pathologic Response | Subtype |
|------------|-------------|--------------|---------------------|---------|
| P01        | N           | 1            | RCB - III           | UNS     |
| P02        | N           | 0            | RCB - II            | MSL     |
| P03        | N           | <1           | RCB - II            | IM      |
| P04        | Y           | 5            | RCB - III           | IM      |
| P05        | N           | 1            | RCB - I             | LAR     |
| P06        | N           | 5            | RCB - I             | UNS     |
| P07        | N           | 30           | pCR                 | IM      |
| P08        | Y           | 15           | RCB - II            | IM      |
| P09        | Y           | 15           | RCB - II            | UNS     |
| P10        | N           | 0            | RCB - II            | LAR     |
| P11        | Y           | 90           | RCB - II            | M       |
| P12        | N           | 10           | RCB - III           | MSL     |
| P13        | N           | 10           | RCB - II            | BL1     |
| P14        | N           | 1            | RCB - III           | BL2     |
| P15        | N           | 0            |                     | IM      |
| P16        | N           | 0            | RCB - II            | UNS     |
| P17        | N           | 75           | RCB - II            | BL1     |
| P18        | Y           | <1           | RCB - II            | M       |
| P19        | N           |              | RCB - II            | BL1     |
| P20        | N           | 2            | RCB - III           | MSL     |
| P21        | N           | 0            | RCB - III           | IM      |
| P22        | Y           | 60           | RCB - II            | M       |
| P23        | N           | 50           | RCB - III           | BL1     |
| P24        | N           |              | RCB - I             | BL1     |
| P25        | Y           | 95           | RCB - II            | MSL     |
| P26        | N           | 0            |                     | LAR     |
| P27        | Y           | 90           | RCB - II            | IM      |
| P28        | N           | 15           | RCB - III           | BL2     |

|            |                                  |
|------------|----------------------------------|
| <b>M*</b>  | <b>Mesenchymal</b>               |
| <b>MSL</b> | <b>Mesenchymal Stem-Like</b>     |
| <b>BL1</b> | <b>Basal-Like 1</b>              |
| <b>BL2</b> | <b>Basal-Like 2</b>              |
| <b>LAR</b> | <b>Luminal Androgen Receptor</b> |
| <b>IM</b>  | <b>Immunomodulatory</b>          |
| <b>UNS</b> | <b>Unspecific</b>                |

|                  |                                               |
|------------------|-----------------------------------------------|
| <b>pCR</b>       | <b>pathological Complete Response</b>         |
| <b>RCB I-III</b> | <b>Residual Cancer Burden (I, II and III)</b> |
